# Supplementary material for: Genome-wide occupancy reveals the localization of H1T2 (H1fnt) to repeat regions and a subset of transcriptionally active chromatin domains in rat spermatids
Source: Epigenetics Chromatin. 2021 Jan 6;14:3. doi: 10.1186/s13072-020-00376-2 (PMC7788777; doi:10.1186/s13072-020-00376-2)
Supplement: Supplementary file 1 — Additional file 1: Table S1. H1T2 ChIP-seq data: MACS 1.4.2 output file with annotations. H1T2 ChIP peaks MACS 1.4.2 with p-value cutoff of 1e-05. A total of 11,570 peaks were identified as overlapping peaks between the two replicates and the H1T2 peaks were annotated using HOMER v4.7. [file 13072_2020_376_MOESM1_ESM.xlsx]

## Sheet: annotation_H1T2_peaks
PeakID (cmd=annotatePeaks.pl H1T2_peaks.bed rn6 -annStats stat_H1T2_peaks)	Chr	Start	End	Strand	Peak Score	Focus Ratio/Region Size	Annotation	Detailed Annotation	Distance to TSS	Nearest PromoterID	Entrez ID	Nearest Unigene	Nearest Refseq	Nearest Ensembl	Gene Name	Gene Alias	Gene Description	Gene Type
MACS_peak_10578	chrUn_AABR07022335v1	1	603	+	889.65	NA	NA	L1M2|LINE|L1	NA	NA
MACS_peak_10588	chrUn_KL568304v1	5907	7226	+	870.22	NA	NA	L1M2|LINE|L1	NA	NA
MACS_peak_10585	chrUn_KL568245v1	2	418	+	751.26	NA	NA	Intergenic	NA	NA
MACS_peak_10587	chrUn_KL568292v1	1166	1525	+	694.72	NA	NA	Intergenic	NA	NA
MACS_peak_8430	chr5	173429327	173430483	+	296.83	NA	intron (NM_130412, intron 1 of 6)	CpG	3983	NM_130412	155173	Rn.12964	NM_130412	ENSRNOG00000019981	Sdf4	-	stromal cell derived factor 4	protein-coding
MACS_peak_7691	chr4	157607087	157608265	+	288.67	NA	Intergenic	CpG	-39083	NM_001191785	314969	Rn.32804	NM_001191785	ENSRNOG00000018453	Nop2	Nol1	NOP2 nucleolar protein	protein-coding
MACS_peak_1930	chr11	36588285	36589603	+	244.49	NA	Intergenic	Intergenic	33528	NM_001127682	498066	Rn.4128	NM_001127682	ENSRNOG00000028238	Sh3bgr	RGD1563599	SH3 domain binding glutamate-rich protein	protein-coding
MACS_peak_775	chr1	162984441	162985207	+	213.2	NA	Intergenic	CpG	86684	NM_153473	266714	Rn.86641	NM_153473	ENSRNOG00000013641	Myo7a	-	myosin VIIA	protein-coding
MACS_peak_3409	chr15	33478042	33479362	+	167.76	NA	Intergenic	Intergenic	48329	NM_152849	260325	Rn.52743	NM_152849	ENSRNOG00000014887	Homez	-	homeobox and leucine zipper encoding	protein-coding
MACS_peak_3872	chr16	51027810	51028177	+	151.25	NA	Intergenic	(CCTAAC)n|Simple_repeat|Simple_repeat	-526277	NM_031819	83720	Rn.8633	NM_031819	ENSRNOG00000030954	Fat1	Fat|Fath	FAT atypical cadherin 1	protein-coding
MACS_peak_9630	chr7	145728134	145728452	+	149.36	NA	Intergenic	(GGTTAG)n|Simple_repeat|Simple_repeat	-255400	NR_104335	102216270		NR_104335		Cistr	Cistr-act	chondrogenesis-associated transcript	ncRNA
MACS_peak_2506	chr13	33508446	33508786	+	145.51	NA	Intergenic	ISAT_RN|Satellite|Satellite	743034	NM_021762	60381	Rn.156195	NM_021762	ENSRNOG00000002319	Tsn	-	translin	protein-coding
MACS_peak_9864	chr8	70269074	70270361	+	142.21	NA	Intergenic	Intergenic	-53998	NM_031152	81830	Rn.1016	NM_031152	ENSRNOG00000011302	Rab11a	-	RAB11a, member RAS oncogene family	protein-coding
MACS_peak_9158	chr7	22323390	22323855	+	133.78	NA	Intergenic	SATI_RN|Satellite|Satellite	619537	NM_001099484	503127	Rn.217634	NM_001099484		Vom2r56	RGD1559561	vomeronasal 2 receptor, 56	protein-coding
MACS_peak_43	chr1	11908999	11913081	+	132.24	NA	intron (NM_001025002, intron 6 of 6).2	CpG	3500	NM_001025002	310926		NM_001025002		LOC310926	Aa1011|Aa1262|Ab2-057|Ac1147	hypothetical protein LOC310926	protein-coding
MACS_peak_902	chr1	180896788	180897147	+	121.93	NA	Intergenic	SATI_RN|Satellite|Satellite	-1886710	NM_001013434	365355	Rn.3271	NM_001013434	ENSRNOG00000012258	Rras2	-	RAS related 2	protein-coding
MACS_peak_9629	chr7	145727570	145727844	+	120.78	NA	Intergenic	(GGTTAG)n|Simple_repeat|Simple_repeat	-254814	NR_104335	102216270		NR_104335		Cistr	Cistr-act	chondrogenesis-associated transcript	ncRNA
MACS_peak_2992	chr14	46649848	46650460	+	119.1	NA	intron (NR_046239, intron 1 of 1)	LSU-rRNA_Hsa|rRNA|rRNA	1672	NM_147136	257642		NM_147136		LOC257642	ribin	rRNA promoter binding protein	protein-coding
MACS_peak_169	chr1	30985740	30986023	+	117.86	NA	Intergenic	Intergenic	-67999	NM_001007734	361465	Rn.4220	NM_001007734	ENSRNOG00000011622	Echdc1	MMCD	ethylmalonyl-CoA decarboxylase 1	protein-coding
MACS_peak_3574	chr15	78122568	78123005	+	117.51	NA	Intergenic	(TAGGGT)n|Simple_repeat|Simple_repeat	-386011	NM_001191688	306091	Rn.232343	NM_001191688		Pcdh9	-	protocadherin 9	protein-coding
MACS_peak_2512	chr13	33592130	33592359	+	116.86	NA	Intergenic	SATI_RN|Satellite|Satellite	659406	NM_021762	60381	Rn.156195	NM_021762	ENSRNOG00000002319	Tsn	-	translin	protein-coding
MACS_peak_2932	chr14	46329499	46329871	+	115.98	NA	Intergenic	LSU-rRNA_Hsa|rRNA|rRNA	-194915	NM_001017500	498368	Rn.29370	NM_001017500	ENSRNOG00000002191	LOC498368	-	similar to RIKEN cDNA 0610040J01	protein-coding
MACS_peak_895	chr1	180858090	180858420	+	115.13	NA	Intergenic	SATI_RN|Satellite|Satellite	-1847998	NM_001013434	365355	Rn.3271	NM_001013434	ENSRNOG00000012258	Rras2	-	RAS related 2	protein-coding
MACS_peak_8109	chr5	91134680	91136468	+	112.75	NA	TTS (NR_046238).7	TTS (NR_046238).7	590	NR_046238	100861534		NR_046238	ENSRNOG00000059852	Rn5-8s	-	5.8S ribosomal RNA	rRNA
MACS_peak_5873	chr2	199044731	199045252	+	111.91	NA	Intergenic	(TAGGGT)n|Simple_repeat|Simple_repeat	-6289	NM_001139486	362003	Rn.160685	NM_001139486	ENSRNOG00000000095	Gpr89b	Gpr89|RGD1304837	G protein-coupled receptor 89B	protein-coding
MACS_peak_8528	chr6	30638594	30639145	+	110.62	NA	TTS (NM_147136).2	TTS (NM_147136).2	420	NM_147136	257642		NM_147136		LOC257642	ribin	rRNA promoter binding protein	protein-coding
MACS_peak_2197	chr12	9544890	9545659	+	109.7	NA	Intergenic	Intergenic	-44063	NM_022852	29535	Rn.54603	NM_022852	ENSRNOG00000046458	Pdx1	Idx1|Ipf1|Stf1	pancreatic and duodenal homeobox 1	protein-coding
MACS_peak_2149	chr11	90463594	90463866	+	105.74	NA	Intergenic	G-rich|Low_complexity|Low_complexity	-57000	NM_013035	25554	Rn.43117	NM_013035	ENSRNOG00000047699	Snai2	Slug	snail family transcriptional repressor 2	protein-coding
MACS_peak_880	chr1	180702225	180702906	+	105.57	NA	Intergenic	SATI_RN|Satellite|Satellite	-1692308	NM_001013434	365355	Rn.3271	NM_001013434	ENSRNOG00000012258	Rras2	-	RAS related 2	protein-coding
MACS_peak_8523	chr6	30629798	30630165	+	105.47	NA	promoter-TSS (NR_046238).6	promoter-TSS (NR_046238).6	-920	NR_046238	100861534		NR_046238	ENSRNOG00000059852	Rn5-8s	-	5.8S ribosomal RNA	rRNA
MACS_peak_7643	chr4	146538771	146539023	+	104.61	NA	Intergenic	IMPB_02|Satellite|Satellite	-59519	NM_001012097	312647	Rn.162765	NM_001012097	ENSRNOG00000007486	Atg7	Apg7l	autophagy related 7	protein-coding
MACS_peak_2989	chr14	46643208	46647636	+	103.95	NA	promoter-TSS (NR_046238).4	promoter-TSS (NR_046238).4	-743	NR_046238	100861534		NR_046238	ENSRNOG00000059852	Rn5-8s	-	5.8S ribosomal RNA	rRNA
MACS_peak_1366	chr1	268524881	268526126	+	103.78	NA	intron (NM_001106367, intron 12 of 26)	CpG	539198	NM_001106367	294043	Rn.46999	NM_001106367	ENSRNOG00000028832	Sorcs3	-	sortilin-related VPS10 domain containing receptor 3	protein-coding
MACS_peak_2958	chr14	46564951	46566527	+	103.45	NA	Intergenic	CpG	-71191	NM_001025002	310926		NM_001025002		LOC310926	Aa1011|Aa1262|Ab2-057|Ac1147	hypothetical protein LOC310926	protein-coding
MACS_peak_8539	chr6	31047205	31047660	+	103.4	NA	Intergenic	LSU-rRNA_Hsa|rRNA|rRNA	-408143	NM_147136	257642		NM_147136		LOC257642	ribin	rRNA promoter binding protein	protein-coding
MACS_peak_883	chr1	180705289	180706248	+	102.98	NA	Intergenic	SATI_RN|Satellite|Satellite	-1695511	NM_001013434	365355	Rn.3271	NM_001013434	ENSRNOG00000012258	Rras2	-	RAS related 2	protein-coding
MACS_peak_6877	chr3	134020564	134020848	+	101.81	NA	Intergenic	ISAT_RN|Satellite|Satellite	385854	NM_001014049	311470	Rn.110539	NM_001014049	ENSRNOG00000004852	Sel1l2	RGD1311278	SEL1L2 ERAD E3 ligase adaptor subunit	protein-coding
MACS_peak_2960	chr14	46588236	46589020	+	101.44	NA	exon (NM_147136, exon 6 of 6)	exon (NM_147136, exon 6 of 6)	-48302	NM_001025002	310926		NM_001025002		LOC310926	Aa1011|Aa1262|Ab2-057|Ac1147	hypothetical protein LOC310926	protein-coding
MACS_peak_181	chr1	36361177	36361437	+	100.96	NA	Intergenic	(GTTAGG)n|Simple_repeat|Simple_repeat	-39136	NM_001107333	306672	Rn.22554	NM_001107333	ENSRNOG00000017613	Papd7	Pols	poly(A) RNA polymerase D7, non-canonical	protein-coding
MACS_peak_897	chr1	180882156	180882557	+	100.58	NA	Intergenic	SATI_RN|Satellite|Satellite	-1872099	NM_001013434	365355	Rn.3271	NM_001013434	ENSRNOG00000012258	Rras2	-	RAS related 2	protein-coding
MACS_peak_9628	chr7	145132630	145133946	+	100.41	NA	intron (NM_022710, intron 2 of 15)	CpG	15337	NM_022710	29691	Rn.53489	NM_022710	ENSRNOG00000036828	Pde1b	Aop2|Pde1b1	phosphodiesterase 1B	protein-coding
MACS_peak_9159	chr7	22327202	22327628	+	99.3	NA	Intergenic	SATI_RN|Satellite|Satellite	615744	NM_001099484	503127	Rn.217634	NM_001099484		Vom2r56	RGD1559561	vomeronasal 2 receptor, 56	protein-coding
MACS_peak_2988	chr14	46640938	46642188	+	98.94	NA	intron (NM_001025002, intron 2 of 6)	SSU-rRNA_Hsa|rRNA|rRNA	-1659	NR_046237	100861533		NR_046237		Rn18s	-	18S ribosomal RNA	rRNA
MACS_peak_8110	chr5	91136722	91137910	+	98.34	NA	Intergenic	LSU-rRNA_Hsa|rRNA|rRNA	2332	NR_046238	100861534		NR_046238	ENSRNOG00000059852	Rn5-8s	-	5.8S ribosomal RNA	rRNA
MACS_peak_2505	chr13	33502416	33505327	+	98.07	NA	Intergenic	SATI_RN|Satellite|Satellite	747779	NM_021762	60381	Rn.156195	NM_021762	ENSRNOG00000002319	Tsn	-	translin	protein-coding
MACS_peak_901	chr1	180893094	180893640	+	97.99	NA	Intergenic	SATI_RN|Satellite|Satellite	-1883110	NM_001013434	365355	Rn.3271	NM_001013434	ENSRNOG00000012258	Rras2	-	RAS related 2	protein-coding
MACS_peak_69	chr1	11960559	11968924	+	97.07	NA	Intergenic	CpG	-5350	NR_046238	100861534		NR_046238	ENSRNOG00000059852	Rn5-8s	-	5.8S ribosomal RNA	rRNA
MACS_peak_1089	chr1	213008609	213009881	+	97.05	NA	Intergenic	CpG	2962	NM_001000236	293598	Rn.141738	NM_001000236	ENSRNOG00000031394	Olr299	ratchr1-200550481-200549552_ORF	olfactory receptor 299	protein-coding
MACS_peak_9160	chr7	22328380	22328807	+	96.24	NA	Intergenic	SATI_RN|Satellite|Satellite	614566	NM_001099484	503127	Rn.217634	NM_001099484		Vom2r56	RGD1559561	vomeronasal 2 receptor, 56	protein-coding
MACS_peak_2937	chr14	46517667	46518300	+	96.07	NA	Intergenic	LSU-rRNA_Hsa|rRNA|rRNA	-118947	NM_001025002	310926		NM_001025002		LOC310926	Aa1011|Aa1262|Ab2-057|Ac1147	hypothetical protein LOC310926	protein-coding
MACS_peak_2148	chr11	90459237	90459540	+	94.69	NA	Intergenic	(AGGGTC)n|Simple_repeat|Simple_repeat	-52658	NM_013035	25554	Rn.43117	NM_013035	ENSRNOG00000047699	Snai2	Slug	snail family transcriptional repressor 2	protein-coding
MACS_peak_2938	chr14	46522388	46524242	+	94.42	NA	Intergenic	LSU-rRNA_Hsa|rRNA|rRNA	-113615	NM_001025002	310926		NM_001025002		LOC310926	Aa1011|Aa1262|Ab2-057|Ac1147	hypothetical protein LOC310926	protein-coding
MACS_peak_8524	chr6	30630405	30632392	+	94.02	NA	TTS (NR_046238).6	TTS (NR_046238).6	497	NR_046238	100861534		NR_046238	ENSRNOG00000059852	Rn5-8s	-	5.8S ribosomal RNA	rRNA
MACS_peak_891	chr1	180808351	180809590	+	93.06	NA	Intergenic	ISAT_RN|Satellite|Satellite	-1798713	NM_001013434	365355	Rn.3271	NM_001013434	ENSRNOG00000012258	Rras2	-	RAS related 2	protein-coding
MACS_peak_4051	chr17	7191519	7192075	+	92.99	NA	Intergenic	(CTAACC)n|Simple_repeat|Simple_repeat	166783	NR_032257	100314096		NR_032257	ENSRNOG00000041300	Mir874	rno-mir-874	microRNA 874	ncRNA
MACS_peak_2991	chr14	46648409	46649502	+	92.87	NA	non-coding (NR_046246, exon 1 of 2)	non-coding (NR_046246, exon 1 of 2)	1860	NR_046246	100861535		NR_046246		Rn28s	-	28S ribosomal RNA	rRNA
MACS_peak_878	chr1	180645736	180646428	+	92.25	NA	Intergenic	SATI_RN|Satellite|Satellite	-1635825	NM_001013434	365355	Rn.3271	NM_001013434	ENSRNOG00000012258	Rras2	-	RAS related 2	protein-coding
MACS_peak_56	chr1	11935603	11936506	+	92.01	NA	Intergenic	RNLTR3-int|LTR|ERVK	-21514	NM_001025002	310926		NM_001025002		LOC310926	Aa1011|Aa1262|Ab2-057|Ac1147	hypothetical protein LOC310926	protein-coding
MACS_peak_890	chr1	180805956	180807468	+	90.77	NA	Intergenic	ISAT_RN|Satellite|Satellite	-1796455	NM_001013434	365355	Rn.3271	NM_001013434	ENSRNOG00000012258	Rras2	-	RAS related 2	protein-coding
MACS_peak_9191	chr7	27563361	27563646	+	90.53	NA	Intergenic	Intergenic	-11425	NM_001246357	282580	Rn.127827	NM_001246357	ENSRNOG00000038948	Stab2	FEEL-2|Hare|RGD1560941	stabilin 2	protein-coding
MACS_peak_8111	chr5	91140276	91141021	+	90.15	NA	Intergenic	LSU-rRNA_Hsa|rRNA|rRNA	5664	NR_046238	100861534		NR_046238	ENSRNOG00000059852	Rn5-8s	-	5.8S ribosomal RNA	rRNA
MACS_peak_2196	chr12	9540291	9540575	+	89.76	NA	Intergenic	Intergenic	-39222	NM_022852	29535	Rn.54603	NM_022852	ENSRNOG00000046458	Pdx1	Idx1|Ipf1|Stf1	pancreatic and duodenal homeobox 1	protein-coding
MACS_peak_5587	chr2	127567686	127567945	+	89.28	NA	Intergenic	(ACCCTA)n|Simple_repeat|Simple_repeat	-57922	NM_001106428	294993	Rn.144829	NM_001106428	ENSRNOG00000010819	Hspa4l	APG-1|OSP94	heat shock protein family A (Hsp70) member 4 like	protein-coding
MACS_peak_881	chr1	180703101	180703998	+	88.67	NA	Intergenic	SATI_RN|Satellite|Satellite	-1693292	NM_001013434	365355	Rn.3271	NM_001013434	ENSRNOG00000012258	Rras2	-	RAS related 2	protein-coding
MACS_peak_4511	chr18	38497605	38497956	+	88.56	NA	Intergenic	SATI_RN|Satellite|Satellite	-168000	NM_001106149	291608	Rn.137959	NM_001106149	ENSRNOG00000039260	RGD1563060	-	similar to AVLV472	protein-coding
MACS_peak_6379	chr3	41642	42101	+	87.01	NA	Intergenic	91ES8_RN|Satellite|Satellite	120867	NM_001024308	499742	Rn.124034	NM_001024308		LOC499742	-	LRRG00137	protein-coding
MACS_peak_4509	chr18	38413824	38415577	+	86.64	NA	Intergenic	SATI_RN|Satellite|Satellite	-84920	NM_001106149	291608	Rn.137959	NM_001106149	ENSRNOG00000039260	RGD1563060	-	similar to AVLV472	protein-coding
MACS_peak_6876	chr3	133999353	133999782	+	86.6	NA	Intergenic	ISAT_RN|Satellite|Satellite	406993	NM_001014049	311470	Rn.110539	NM_001014049	ENSRNOG00000004852	Sel1l2	RGD1311278	SEL1L2 ERAD E3 ligase adaptor subunit	protein-coding
MACS_peak_2199	chr12	9549204	9549490	+	86.24	NA	Intergenic	Intergenic	-48136	NM_022852	29535	Rn.54603	NM_022852	ENSRNOG00000046458	Pdx1	Idx1|Ipf1|Stf1	pancreatic and duodenal homeobox 1	protein-coding
MACS_peak_8107	chr5	91130816	91131778	+	86.13	NA	Intergenic	SSU-rRNA_Hsa|rRNA|rRNA	-1669	NR_046238	100861534		NR_046238	ENSRNOG00000059852	Rn5-8s	-	5.8S ribosomal RNA	rRNA
MACS_peak_877	chr1	180644557	180645229	+	85.84	NA	Intergenic	SATI_RN|Satellite|Satellite	-1634636	NM_001013434	365355	Rn.3271	NM_001013434	ENSRNOG00000012258	Rras2	-	RAS related 2	protein-coding
MACS_peak_879	chr1	180692822	180693178	+	85.35	NA	Intergenic	SATI_RN|Satellite|Satellite	-1682743	NM_001013434	365355	Rn.3271	NM_001013434	ENSRNOG00000012258	Rras2	-	RAS related 2	protein-coding
MACS_peak_73	chr1	11974494	11975082	+	85.24	NA	Intergenic	LSU-rRNA_Hsa|rRNA|rRNA	4697	NR_046238	100861534		NR_046238	ENSRNOG00000059852	Rn5-8s	-	5.8S ribosomal RNA	rRNA
MACS_peak_342	chr1	56789885	56790131	+	83.16	NA	Intergenic	(ACCCTA)n|Simple_repeat|Simple_repeat	-106437	NM_001169138	292406	Rn.165619	NM_001169138	ENSRNOG00000010529	Thbs2	TSP-2	thrombospondin 2	protein-coding
MACS_peak_8522	chr6	30628614	30629643	+	81.61	NA	Intergenic	SSU-rRNA_Hsa|rRNA|rRNA	-1773	NR_046238	100861534		NR_046238	ENSRNOG00000059852	Rn5-8s	-	5.8S ribosomal RNA	rRNA
MACS_peak_905	chr1	180902636	180902944	+	81.41	NA	Intergenic	SATI_RN|Satellite|Satellite	-1892533	NM_001013434	365355	Rn.3271	NM_001013434	ENSRNOG00000012258	Rras2	-	RAS related 2	protein-coding
MACS_peak_2995	chr14	46652891	46656103	+	81.37	NA	non-coding (NR_046246, exon 2 of 2)	non-coding (NR_046246, exon 2 of 2)	-2671	NM_147136	257642		NM_147136		LOC257642	ribin	rRNA promoter binding protein	protein-coding
MACS_peak_2171	chr12	3350349	3352654	+	81.02	NA	Intergenic	SATI_RN|Satellite|Satellite	-525268	NM_001170397	288378	Rn.138846	NM_001170397	ENSRNOG00000029881	Clec4m	Cd209b	C-type lectin domain family 4 member M	protein-coding
MACS_peak_9444	chr7	99152501	99152939	+	80.65	NA	Intergenic	(GTTAGG)n|Simple_repeat|Simple_repeat	-5382	NM_001134844	24300	Rn.228579	NM_001134844	ENSRNOG00000033680	Cyp2b1	Cyp2b-1|Cypbe	cytochrome P450, family 2, subfamily b, polypeptide 1	protein-coding
MACS_peak_10954	chrX	73399679	73401554	+	80.64	NA	Intergenic	(T)n|Simple_repeat|Simple_repeat	-74278	NM_001318118	317308		NM_001318118	ENSRNOG00000029788	Zfp36l3	RGD1559581	zinc finger protein 36, C3H type-like 3	protein-coding
MACS_peak_6127	chr20	2074489	2075724	+	80.64	NA	Intergenic	CpG	-1161	NM_001008853	365527	Rn.163419	NM_001008853	ENSRNOG00000040052	RT1-M6-2	-	RT1 class I, locus M6, gene 2	protein-coding
MACS_peak_2939	chr14	46524429	46526780	+	80.38	NA	Intergenic	LSU-rRNA_Hsa|rRNA|rRNA	-111326	NM_001025002	310926		NM_001025002		LOC310926	Aa1011|Aa1262|Ab2-057|Ac1147	hypothetical protein LOC310926	protein-coding
MACS_peak_3008	chr14	46684906	46685898	+	80.28	NA	intron (NM_001025002, intron 6 of 6)	SSU-rRNA_Hsa|rRNA|rRNA	-1581	NR_046238	100861534		NR_046238	ENSRNOG00000059852	Rn5-8s	-	5.8S ribosomal RNA	rRNA
MACS_peak_8527	chr6	30638038	30638437	+	80.18	NA	TTS (NM_147136).2	TTS (NM_147136).2	1052	NM_147136	257642		NM_147136		LOC257642	ribin	rRNA promoter binding protein	protein-coding
MACS_peak_3006	chr14	46679299	46683899	+	79.05	NA	intron (NM_001025002, intron 6 of 6)	CpG-5608	-5384	NR_046238	100861534		NR_046238	ENSRNOG00000059852	Rn5-8s	-	5.8S ribosomal RNA	rRNA
MACS_peak_8526	chr6	30634836	30635138	+	78.95	NA	Intergenic	LSU-rRNA_Hsa|rRNA|rRNA	4086	NR_046238	100861534		NR_046238	ENSRNOG00000059852	Rn5-8s	-	5.8S ribosomal RNA	rRNA
MACS_peak_2175	chr12	3356350	3357460	+	78.45	NA	Intergenic	SATI_RN|Satellite|Satellite	-530672	NM_001170397	288378	Rn.138846	NM_001170397	ENSRNOG00000029881	Clec4m	Cd209b	C-type lectin domain family 4 member M	protein-coding
MACS_peak_6874	chr3	133995488	133996663	+	78.19	NA	Intergenic	ISAT_RN|Satellite|Satellite	410485	NM_001014049	311470	Rn.110539	NM_001014049	ENSRNOG00000004852	Sel1l2	RGD1311278	SEL1L2 ERAD E3 ligase adaptor subunit	protein-coding
MACS_peak_8529	chr6	30640414	30640720	+	76.59	NA	Intergenic	LSU-rRNA_Hsa|rRNA|rRNA	-1278	NM_147136	257642		NM_147136		LOC257642	ribin	rRNA promoter binding protein	protein-coding
MACS_peak_4192	chr17	44391251	44391505	+	76.36	NA	Intergenic	SATI_RN|Satellite|Satellite	-130766	NM_022686	64627	Rn.1659	NM_022686	ENSRNOG00000054017	Hist1h4b	H1ft|Hist4|Hist4h4	histone cluster 1 H4 family member B	protein-coding
MACS_peak_42	chr1	11907764	11908823	+	75.95	NA	intron (NM_001025002, intron 6 of 6).2	CpG	-1699	NR_046238	100861534		NR_046238	ENSRNOG00000059852	Rn5-8s	-	5.8S ribosomal RNA	rRNA
MACS_peak_9757	chr8	39893009	39893233	+	75.66	NA	3' UTR (NM_001108135, exon 26 of 26)	3' UTR (NM_001108135, exon 26 of 26)	14153	NM_181375	300518	Rn.96119	NM_181375	ENSRNOG00000049289	Robo4	-	roundabout guidance receptor 4	protein-coding
MACS_peak_896	chr1	180861299	180861552	+	74.77	NA	Intergenic	SATI_RN|Satellite|Satellite	-1851168	NM_001013434	365355	Rn.3271	NM_001013434	ENSRNOG00000012258	Rras2	-	RAS related 2	protein-coding
MACS_peak_10806	chrX	36469782	36470472	+	74.41	NA	intron (NM_001190994, intron 19 of 32)	intron (NM_001190994, intron 19 of 32)	455785	NM_001190994	678739	Rn.225026	NM_001190994		Phka2	-	phosphorylase kinase regulatory subunit alpha 2	protein-coding
MACS_peak_10267	chr9	40518062	40518313	+	74.34	NA	Intergenic	(CTCCCTGT)n|Simple_repeat|Simple_repeat	-453902	NM_001013111	301333	Rn.9310	NM_001013111	ENSRNOG00000013415	Ptpn18	PTP20	protein tyrosine phosphatase, non-receptor type 18	protein-coding
MACS_peak_2986	chr14	46636527	46639809	+	74.19	NA	intron (NM_001025002, intron 2 of 6)	CpG-5603	1238	NM_001025002	310926		NM_001025002		LOC310926	Aa1011|Aa1262|Ab2-057|Ac1147	hypothetical protein LOC310926	protein-coding
MACS_peak_40	chr1	11903594	11905146	+	73.72	NA	Intergenic	LSU-rRNA_Hsa|rRNA|rRNA	2224	NR_046238	100861534		NR_046238	ENSRNOG00000059852	Rn5-8s	-	5.8S ribosomal RNA	rRNA
MACS_peak_4721	chr19	5821392	5822777	+	73.64	NA	Intergenic	Intergenic	-209851	NM_053393	84408	Rn.214220	NM_053393	ENSRNOG00000056643	Cdh8	-	cadherin 8	protein-coding
MACS_peak_4729	chr19	5835882	5837122	+	73.59	NA	Intergenic	CpG	-195433	NM_053393	84408	Rn.214220	NM_053393	ENSRNOG00000056643	Cdh8	-	cadherin 8	protein-coding
MACS_peak_9506	chr7	116306835	116307073	+	73.28	NA	Intergenic	(ACCCTA)n|Simple_repeat|Simple_repeat	-49215	NM_001017467	362934	Rn.3321	NM_001017467	ENSRNOG00000007091	Ly6e	-	lymphocyte antigen 6 family member E	protein-coding
MACS_peak_2990	chr14	46647892	46648252	+	72.86	NA	non-coding (NR_046246, exon 1 of 2)	non-coding (NR_046246, exon 1 of 2)	977	NR_046246	100861535		NR_046246		Rn28s	-	28S ribosomal RNA	rRNA
MACS_peak_8525	chr6	30632631	30633796	+	71.31	NA	Intergenic	LSU-rRNA_Hsa|rRNA|rRNA	2312	NR_046238	100861534		NR_046238	ENSRNOG00000059852	Rn5-8s	-	5.8S ribosomal RNA	rRNA
MACS_peak_882	chr1	180704202	180704822	+	71.06	NA	Intergenic	SATI_RN|Satellite|Satellite	-1694255	NM_001013434	365355	Rn.3271	NM_001013434	ENSRNOG00000012258	Rras2	-	RAS related 2	protein-coding
MACS_peak_8106	chr5	91124022	91130515	+	70.98	NA	Intergenic	Intergenic	-5698	NR_046238	100861534		NR_046238	ENSRNOG00000059852	Rn5-8s	-	5.8S ribosomal RNA	rRNA
MACS_peak_4510	chr18	38416030	38417296	+	70.91	NA	Intergenic	SATI_RN|Satellite|Satellite	-86883	NM_001106149	291608	Rn.137959	NM_001106149	ENSRNOG00000039260	RGD1563060	-	similar to AVLV472	protein-coding
MACS_peak_8521	chr6	30628052	30628393	+	70.64	NA	Intergenic	CpG	-2679	NR_046238	100861534		NR_046238	ENSRNOG00000059852	Rn5-8s	-	5.8S ribosomal RNA	rRNA
MACS_peak_912	chr1	180946972	180947203	+	69.5	NA	Intergenic	ISAT_RN|Satellite|Satellite	-1936830	NM_001013434	365355	Rn.3271	NM_001013434	ENSRNOG00000012258	Rras2	-	RAS related 2	protein-coding
MACS_peak_7647	chr4	146546187	146548799	+	69.04	NA	Intergenic	IMPB_02|Satellite|Satellite	-50923	NM_001012097	312647	Rn.162765	NM_001012097	ENSRNOG00000007486	Atg7	Apg7l	autophagy related 7	protein-coding
MACS_peak_2513	chr13	33593267	33593590	+	69.01	NA	Intergenic	ISAT_RN|Satellite|Satellite	658222	NM_021762	60381	Rn.156195	NM_021762	ENSRNOG00000002319	Tsn	-	translin	protein-coding
MACS_peak_903	chr1	180898029	180898470	+	68.48	NA	Intergenic	SATI_RN|Satellite|Satellite	-1887992	NM_001013434	365355	Rn.3271	NM_001013434	ENSRNOG00000012258	Rras2	-	RAS related 2	protein-coding
MACS_peak_1692	chr10	82775783	82776373	+	67.95	NA	exon (NM_001109565, exon 1 of 1)	exon (NM_001109565, exon 1 of 1)	387	NM_001109565	690026	Rn.166909	NM_001109565	ENSRNOG00000024041	Hils1	-	histone linker H1 domain, spermatid-specific 1	protein-coding
MACS_peak_2961	chr14	46590180	46590579	+	67.23	NA	intron (NM_147136, intron 1 of 5)	LSU-rRNA_Hsa|rRNA|rRNA	-46551	NM_001025002	310926		NM_001025002		LOC310926	Aa1011|Aa1262|Ab2-057|Ac1147	hypothetical protein LOC310926	protein-coding
MACS_peak_9445	chr7	99168137	99168614	+	67.06	NA	intron (NM_001134844, intron 1 of 8)	(GTTAGG)n|Simple_repeat|Simple_repeat	10273	NM_001134844	24300	Rn.228579	NM_001134844	ENSRNOG00000033680	Cyp2b1	Cyp2b-1|Cypbe	cytochrome P450, family 2, subfamily b, polypeptide 1	protein-coding
MACS_peak_4989	chr19	56337716	56339243	+	66.87	NA	Intergenic	Intergenic	22035	NM_001039030	361438	Rn.209051	NM_001039030	ENSRNOG00000026964	Gas8	-	growth arrest specific 8	protein-coding
MACS_peak_2959	chr14	46580130	46581498	+	66.4	NA	Intergenic	Intergenic	-56116	NM_001025002	310926		NM_001025002		LOC310926	Aa1011|Aa1262|Ab2-057|Ac1147	hypothetical protein LOC310926	protein-coding
MACS_peak_934	chr1	181186301	181186609	+	65.95	NA	Intergenic	ISAT_RN|Satellite|Satellite	-2176198	NM_001013434	365355	Rn.3271	NM_001013434	ENSRNOG00000012258	Rras2	-	RAS related 2	protein-coding
MACS_peak_70	chr1	11969078	11970869	+	65.09	NA	promoter-TSS (NR_046238).3	promoter-TSS (NR_046238).3	-118	NR_046238	100861534		NR_046238	ENSRNOG00000059852	Rn5-8s	-	5.8S ribosomal RNA	rRNA
MACS_peak_3009	chr14	46686638	46687420	+	64.38	NA	promoter-TSS (NR_046238).5	promoter-TSS (NR_046238).5	46	NR_046238	100861534		NR_046238	ENSRNOG00000059852	Rn5-8s	-	5.8S ribosomal RNA	rRNA
MACS_peak_8541	chr6	31049804	31050198	+	64.34	NA	Intergenic	CpG	-410712	NM_147136	257642		NM_147136		LOC257642	ribin	rRNA promoter binding protein	protein-coding
MACS_peak_944	chr1	181286540	181287062	+	64.23	NA	Intergenic	SATI_RN|Satellite|Satellite	-2276544	NM_001013434	365355	Rn.3271	NM_001013434	ENSRNOG00000012258	Rras2	-	RAS related 2	protein-coding
MACS_peak_2994	chr14	46651755	46652342	+	63.98	NA	promoter-TSS (NM_147136)	promoter-TSS (NM_147136)	-222	NM_147136	257642		NM_147136		LOC257642	ribin	rRNA promoter binding protein	protein-coding
MACS_peak_8540	chr6	31048876	31049270	+	63.71	NA	Intergenic	LSU-rRNA_Hsa|rRNA|rRNA	-409784	NM_147136	257642		NM_147136		LOC257642	ribin	rRNA promoter binding protein	protein-coding
MACS_peak_2174	chr12	3355125	3355862	+	63.48	NA	Intergenic	SATI_RN|Satellite|Satellite	-529260	NM_001170397	288378	Rn.138846	NM_001170397	ENSRNOG00000029881	Clec4m	Cd209b	C-type lectin domain family 4 member M	protein-coding
MACS_peak_6878	chr3	134021433	134021660	+	62.87	NA	Intergenic	ISAT_RN|Satellite|Satellite	385014	NM_001014049	311470	Rn.110539	NM_001014049	ENSRNOG00000004852	Sel1l2	RGD1311278	SEL1L2 ERAD E3 ligase adaptor subunit	protein-coding
MACS_peak_2170	chr12	3340762	3341157	+	62.5	NA	Intergenic	SATI_RN|Satellite|Satellite	-514726	NM_001170397	288378	Rn.138846	NM_001170397	ENSRNOG00000029881	Clec4m	Cd209b	C-type lectin domain family 4 member M	protein-coding
MACS_peak_2998	chr14	46658339	46658685	+	62.16	NA	intron (NM_001025002, intron 2 of 6)	intron (NM_001025002, intron 2 of 6)	-6686	NM_147136	257642		NM_147136		LOC257642	ribin	rRNA promoter binding protein	protein-coding
MACS_peak_4087	chr17	13948552	13948908	+	61.8	NA	Intergenic	(A)n|Simple_repeat|Simple_repeat	109912	NM_001170429	689232	Rn.15096	NM_001170429	ENSRNOG00000014538	Nxnl2	Rdcvf2	nucleoredoxin-like 2	protein-coding
MACS_peak_2993	chr14	46650682	46651095	+	61.7	NA	intron (NR_046239, intron 1 of 1)	LSU-rRNA_Hsa|rRNA|rRNA	938	NM_147136	257642		NM_147136		LOC257642	ribin	rRNA promoter binding protein	protein-coding
MACS_peak_8108	chr5	91131960	91133755	+	61.52	NA	promoter-TSS (NR_046238)	promoter-TSS (NR_046238)	-109	NR_046238	100861534		NR_046238	ENSRNOG00000059852	Rn5-8s	-	5.8S ribosomal RNA	rRNA
MACS_peak_71	chr1	11971463	11972959	+	61.5	NA	Intergenic	LSU-rRNA_Hsa|rRNA|rRNA	2120	NR_046238	100861534		NR_046238	ENSRNOG00000059852	Rn5-8s	-	5.8S ribosomal RNA	rRNA
MACS_peak_8551	chr6	31065936	31066247	+	61.15	NA	Intergenic	Intergenic	-426802	NM_147136	257642		NM_147136		LOC257642	ribin	rRNA promoter binding protein	protein-coding
MACS_peak_8251	chr5	133010086	133010603	+	61.1	NA	Intergenic	RatSatRep2|Unknown|Unknown	715312	NM_134339	171302	Rn.92407	NM_134339	ENSRNOG00000007770	Foxe3	FREAC-8|HFH7|HNF3	forkhead box E3	protein-coding
MACS_peak_45	chr1	11914191	11914718	+	61	NA	promoter-TSS (NM_001025002).2	promoter-TSS (NM_001025002).2	86	NM_001025002	310926		NM_001025002		LOC310926	Aa1011|Aa1262|Ab2-057|Ac1147	hypothetical protein LOC310926	protein-coding
MACS_peak_717	chr1	148642771	148643071	+	60.73	NA	Intergenic	Intergenic	192708	NM_001037659	652956	Rn.189455	NM_001037659		Mpp1	p55	membrane palmitoylated protein 1	protein-coding
MACS_peak_2580	chr13	48490646	48490891	+	60.29	NA	Intergenic	(CCTAAC)n|Simple_repeat|Simple_repeat	-22240	NM_001107172	304784	Rn.218579	NM_001107172	ENSRNOG00000029514	Slc26a9	-	solute carrier family 26 member 9	protein-coding
MACS_peak_4728	chr19	5834871	5835424	+	60.12	NA	Intergenic	CpG	-196788	NM_053393	84408	Rn.214220	NM_053393	ENSRNOG00000056643	Cdh8	-	cadherin 8	protein-coding
MACS_peak_8530	chr6	30640874	30641774	+	59.96	NA	Intergenic	LSU-rRNA_Hsa|rRNA|rRNA	-2035	NM_147136	257642		NM_147136		LOC257642	ribin	rRNA promoter binding protein	protein-coding
MACS_peak_10800	chrX	36446694	36446933	+	59.65	NA	intron (NM_001190994, intron 19 of 32)	intron (NM_001190994, intron 19 of 32)	479099	NM_001190994	678739	Rn.225026	NM_001190994		Phka2	-	phosphorylase kinase regulatory subunit alpha 2	protein-coding
MACS_peak_956	chr1	182009396	182009644	+	59.61	NA	Intergenic	SATI_RN|Satellite|Satellite	1720049	NM_080781	114023	Rn.4327	NM_080781	ENSRNOG00000057623	Copb1	-	coatomer protein complex, subunit beta 1	protein-coding
MACS_peak_7646	chr4	146542676	146543744	+	59.52	NA	Intergenic	IMPB_02|Satellite|Satellite	-55206	NM_001012097	312647	Rn.162765	NM_001012097	ENSRNOG00000007486	Atg7	Apg7l	autophagy related 7	protein-coding
MACS_peak_9312	chr7	59248648	59248866	+	59.48	NA	intron (NM_053594, intron 6 of 13)	(TTAGGG)n|Simple_repeat|Simple_repeat	47816	NM_001113390	94202	Rn.6277	NM_053594	ENSRNOG00000004483	Ptprr	PC12-PTP1|Pcptp1|R-PTP-R	protein tyrosine phosphatase, receptor type, R	protein-coding
MACS_peak_3684	chr16	5673431	5673670	+	59.27	NA	intron (NM_175595, intron 2 of 36)	(AACCCT)n|Simple_repeat|Simple_repeat	122268	NM_175595	306243	Rn.229510	NM_175595	ENSRNOG00000031287	Cacna2d3	-	calcium voltage-gated channel auxiliary subunit alpha2delta 3	protein-coding
MACS_peak_7040	chr4	6877647	6878148	+	59.26	NA	Intergenic	Intergenic	-25301	NM_001106573	296730	Rn.23610	NM_001106573	ENSRNOG00000009226	Crygn	-	crystallin, gamma N	protein-coding
MACS_peak_1870	chr11	18174950	18175565	+	59.22	NA	Intergenic	L1_Rn|LINE|L1	-490354	NM_001105895	288291	Rn.83908	NM_001105895	ENSRNOG00000001916	Tmprss15	Prss7	transmembrane serine protease 15	protein-coding
MACS_peak_11286	chrY	2133152	2133519	+	59.04	NA	Intergenic	RatSatRep2|Unknown|Unknown	-729913	NM_001329902	103694559		NM_001329902	ENSRNOG00000058664	Usp9y	-	ubiquitin specific peptidase 9, Y-linked	protein-coding
MACS_peak_6206	chr20	8045431	8045755	+	58.76	NA	intron (NM_001012174, intron 1 of 10)	intron (NM_001012174, intron 1 of 10)	16131	NM_001012174	361810	Rn.144288	NM_001012174	ENSRNOG00000022523	Fkbp5	-	FK506 binding protein 5	protein-coding
MACS_peak_9267	chr7	46629039	46629384	+	58.42	NA	Intergenic	RatSatRep2|Unknown|Unknown	956926	NM_001171177	299762	Rn.214064	NM_001171177	ENSRNOG00000004585	Tmtc2	RGD1309848	transmembrane and tetratricopeptide repeat containing 2	protein-coding
MACS_peak_6235	chr20	14989391	14989899	+	58.41	NA	intron (NM_001271377, intron 22 of 28)	RatSatRep2|Unknown|Unknown	345100	NM_001271377	690865	Rn.231824	NM_001271377	ENSRNOG00000000606	Pcdh15	-	protocadherin related 15	protein-coding
MACS_peak_2173	chr12	3354118	3354770	+	58.02	NA	Intergenic	SATI_RN|Satellite|Satellite	-528211	NM_001170397	288378	Rn.138846	NM_001170397	ENSRNOG00000029881	Clec4m	Cd209b	C-type lectin domain family 4 member M	protein-coding
MACS_peak_46	chr1	11915450	11917508	+	57.88	NA	Intergenic	CpG-48	-1939	NM_001025002	310926		NM_001025002		LOC310926	Aa1011|Aa1262|Ab2-057|Ac1147	hypothetical protein LOC310926	protein-coding
MACS_peak_2940	chr14	46527211	46527554	+	56.91	NA	Intergenic	CpG	-109548	NM_001025002	310926		NM_001025002		LOC310926	Aa1011|Aa1262|Ab2-057|Ac1147	hypothetical protein LOC310926	protein-coding
MACS_peak_4963	chr19	46756298	46756534	+	56.6	NA	Intergenic	(GGTTAG)n|Simple_repeat|Simple_repeat	-5053	NM_001106188	292041	Rn.229354	NM_001106188		Wwox	-	WW domain-containing oxidoreductase	protein-coding
MACS_peak_4109	chr17	22736934	22737305	+	56.33	NA	Intergenic	L1_Rn|LINE|L1	-58866	NM_001177820	100362172	Rn.157963	NM_001177820	ENSRNOG00000059415	LOC100362172	LRRGT00112	LRRGT00112-like	protein-coding
MACS_peak_2502	chr13	33487803	33488303	+	56.33	NA	Intergenic	SATI_RN|Satellite|Satellite	763597	NM_021762	60381	Rn.156195	NM_021762	ENSRNOG00000002319	Tsn	-	translin	protein-coding
MACS_peak_11136	chrX	125261982	125262332	+	55.84	NA	intron (NM_001109631, intron 1 of 3)	RatSatRep2|Unknown|Unknown	183687	NM_001109631	691215	Rn.218604	NM_001109631	ENSRNOG00000028189	LOC691215	-	hypothetical protein LOC691215	protein-coding
MACS_peak_4470	chr18	30349039	30349413	+	55.77	NA	Intergenic	RatSatRep2|Unknown|Unknown	-26572	NM_001109123	498843	Rn.140789	NM_001109123	ENSRNOG00000039476	Pcdhb2	RGD1563132	protocadherin beta 2	protein-coding
MACS_peak_973	chr1	183874938	183875236	+	55.25	NA	Intergenic	L1_Rn|LINE|L1	-17754	NM_017229	29516	Rn.10322	NM_017229	ENSRNOG00000011417	Pde3b	-	phosphodiesterase 3B	protein-coding
MACS_peak_4570	chr18	51999740	52000423	+	54.98	NA	Intergenic	L1_Rn|LINE|L1	-3097	NM_001007759	364878	Rn.203312	NM_001007759	ENSRNOG00000023013	2019-03-03	-	membrane associated ring-CH-type finger 3	protein-coding
MACS_peak_72	chr1	11973480	11974184	+	54.95	NA	Intergenic	LSU-rRNA_Hsa|rRNA|rRNA	3741	NR_046238	100861534		NR_046238	ENSRNOG00000059852	Rn5-8s	-	5.8S ribosomal RNA	rRNA
MACS_peak_8549	chr6	31062879	31063406	+	54.89	NA	Intergenic	RMER17B_Rn|LTR|ERVK	-423853	NM_147136	257642		NM_147136		LOC257642	ribin	rRNA promoter binding protein	protein-coding
MACS_peak_6251	chr20	20460243	20460706	+	54.85	NA	intron (NM_001033984, intron 45 of 45)	RNHAL1|LINE|L1	-115903	NM_019296	54237	Rn.6934	NM_019296	ENSRNOG00000000632	Cdk1	Cdc2|Cdc2a	cyclin-dependent kinase 1	protein-coding
MACS_peak_41	chr1	11906151	11907421	+	54.74	NA	promoter-TSS (NR_046238).2	promoter-TSS (NR_046238).2	-192	NR_046238	100861534		NR_046238	ENSRNOG00000059852	Rn5-8s	-	5.8S ribosomal RNA	rRNA
MACS_peak_8747	chr6	82459647	82460247	+	54.64	NA	Intergenic	L1_Rn|LINE|L1	-623793	NM_001108024	314164	Rn.224998	NM_001108024	ENSRNOG00000005550	Lrfn5	-	leucine rich repeat and fibronectin type III domain containing 5	protein-coding
MACS_peak_10412	chr9	81148961	81149210	+	54.04	NA	Intergenic	(GGTTAG)n|Simple_repeat|Simple_repeat	251902	NM_001191810	301509	Rn.228393	NM_001191810	ENSRNOG00000014182	Tns1	Tns	tensin 1	protein-coding
MACS_peak_2982	chr14	46629710	46631045	+	53.76	NA	intron (NM_147136, intron 1 of 5)	intron (NM_147136, intron 1 of 5)	-6553	NM_001025002	310926		NM_001025002		LOC310926	Aa1011|Aa1262|Ab2-057|Ac1147	hypothetical protein LOC310926	protein-coding
MACS_peak_10967	chrX	76258406	76258852	+	53.56	NA	Intergenic	L1_Rn|LINE|L1	43216	NR_032273	100314105		NR_032273	ENSRNOG00000035555	Mir384	rno-mir-384	microRNA 384	ncRNA
MACS_peak_7773	chr4	182018886	182019132	+	53.31	NA	intron (NM_001014061, intron 12 of 12)	(ACCCTA)n|Simple_repeat|Simple_repeat	144148	NM_001014061	312863	Rn.42180	NM_001014061	ENSRNOG00000001847	Ccdc91	-	coiled-coil domain containing 91	protein-coding
MACS_peak_1942	chr11	39133623	39133921	+	53.29	NA	Intergenic	RatSatRep2|Unknown|Unknown	-348636	NM_001013184	360704	Rn.4120	NM_001013184	ENSRNOG00000050978	Hmgn1	-	high mobility group nucleosome binding domain 1	protein-coding
MACS_peak_10097	chr9	1431313	1431578	+	53.24	NA	intron (NM_001134762, intron 4 of 21)	CpG	285745	NM_001134762	501088	Rn.203950	NM_001134762	ENSRNOG00000010637	Tbc1d5	RGD1561626	TBC1 domain family, member 5	protein-coding
MACS_peak_52	chr1	11927198	11927477	+	53.07	NA	Intergenic	Intergenic	-12797	NM_001025002	310926		NM_001025002		LOC310926	Aa1011|Aa1262|Ab2-057|Ac1147	hypothetical protein LOC310926	protein-coding
MACS_peak_11288	chrY	2854071	2855432	+	52.97	NA	Intergenic	RatSatRep2|Unknown|Unknown	-1451329	NM_001329902	103694559		NM_001329902	ENSRNOG00000058664	Usp9y	-	ubiquitin specific peptidase 9, Y-linked	protein-coding
MACS_peak_913	chr1	180948980	180949225	+	52.95	NA	Intergenic	SATI_RN|Satellite|Satellite	-1938845	NM_001013434	365355	Rn.3271	NM_001013434	ENSRNOG00000012258	Rras2	-	RAS related 2	protein-coding
MACS_peak_6753	chr3	98738193	98739491	+	52.81	NA	Intergenic	RNHAL1|LINE|L1	441288	NM_012971	25469	Rn.9884	NM_012971	ENSRNOG00000004918	Kcna4	KCHAN|Kv1.4|Kv4|RHK1|RK3	potassium voltage-gated channel subfamily A member 4	protein-coding
MACS_peak_7373	chr4	77406335	77407892	+	52.25	NA	Intergenic	CpG	-60102	NM_001134979	312299	Rn.9027	NM_001134979	ENSRNOG00000006048	Ezh2	-	enhancer of zeste 2 polycomb repressive complex 2 subunit	protein-coding
MACS_peak_8227	chr5	123860548	123861677	+	52.04	NA	Intergenic	L1_Rn|LINE|L1	-160254	NM_153621	266729	Rn.206534	NM_153621	ENSRNOG00000007410	Dab1	-	DAB1, reelin adaptor protein	protein-coding
MACS_peak_7645	chr4	146541791	146542187	+	52	NA	Intergenic	IMPB_02|Satellite|Satellite	-56427	NM_001012097	312647	Rn.162765	NM_001012097	ENSRNOG00000007486	Atg7	Apg7l	autophagy related 7	protein-coding
MACS_peak_3386	chr15	27905972	27906243	+	51.85	NA	Intergenic	(GTTAGG)n|Simple_repeat|Simple_repeat	-27104	NM_001012467	305840	Rn.215812	NM_001012467	ENSRNOG00000010261	Rnase10	RGD1310415|Rah1	ribonuclease A family member 10	protein-coding
MACS_peak_482	chr1	82801078	82801500	+	51.66	NA	Intergenic	(GTTAGG)n|Simple_repeat|Simple_repeat	100628	NM_001170329	292711	Rn.49610	NM_001170329	ENSRNOG00000022679	RGD1564380	-	similar to BC049730 protein	protein-coding
MACS_peak_10876	chrX	49154826	49155163	+	51.47	NA	Intergenic	RatSatRep2|Unknown|Unknown	375884	NM_001109317	501569	Rn.16447	NM_001109317	ENSRNOG00000030418	Tmem47	RGD1564799	transmembrane protein 47	protein-coding
MACS_peak_8914	chr6	130674728	130675833	+	51.45	NA	Intergenic	RatSatRep2|Unknown|Unknown	839361	NM_001012194	362779	Rn.92083	NM_001012194	ENSRNOG00000005274	Vrk1	-	vaccinia related kinase 1	protein-coding
MACS_peak_3853	chr16	46280935	46281163	+	51.2	NA	Intergenic	(TAACCC)n|Simple_repeat|Simple_repeat	-142820	NM_001169133	306451		NM_001169133	ENSRNOG00000012802	Tenm3	Odz3	teneurin transmembrane protein 3	protein-coding
MACS_peak_2110	chr11	85310868	85312042	+	50.96	NA	Intergenic	L1_Rn|LINE|L1	2573	NM_001000042	287969	Rn.142227	NM_001000042	ENSRNOG00000050293	Olr1569	-	olfactory receptor 1569	protein-coding
MACS_peak_2193	chr12	9531850	9532518	+	50.79	NA	Intergenic	Intergenic	-30973	NM_022852	29535	Rn.54603	NM_022852	ENSRNOG00000046458	Pdx1	Idx1|Ipf1|Stf1	pancreatic and duodenal homeobox 1	protein-coding
MACS_peak_10581	chrUn_AABR07024203v1	32	391	+	50.79	NA	Intergenic	RatSatRep2|Unknown|Unknown	59181	NM_053921	116718	Rn.234355	NM_053921	ENSRNOG00000009718	Pex12	-	peroxisomal biogenesis factor 12	protein-coding
MACS_peak_9478	chr7	105809320	105810095	+	50.68	NA	Intergenic	RatSatRep2|Unknown|Unknown	-216903	NM_017142	29241	Rn.10382	NM_017142	ENSRNOG00000004890	Adcy8	Ac8	adenylate cyclase 8	protein-coding
MACS_peak_898	chr1	180883814	180884401	+	50.56	NA	Intergenic	SATI_RN|Satellite|Satellite	-1873850	NM_001013434	365355	Rn.3271	NM_001013434	ENSRNOG00000012258	Rras2	-	RAS related 2	protein-coding
MACS_peak_918	chr1	180972285	180973046	+	50.37	NA	Intergenic	SATI_RN|Satellite|Satellite	-1962408	NM_001013434	365355	Rn.3271	NM_001013434	ENSRNOG00000012258	Rras2	-	RAS related 2	protein-coding
MACS_peak_2941	chr14	46528221	46528981	+	50.3	NA	Intergenic	Intergenic	-108329	NM_001025002	310926		NM_001025002		LOC310926	Aa1011|Aa1262|Ab2-057|Ac1147	hypothetical protein LOC310926	protein-coding
MACS_peak_6313	chr20	40883246	40883851	+	50.18	NA	Intergenic	Intergenic	104526	NM_001005539	294422	Rn.8142	NM_001005539	ENSRNOG00000000815	Smpdl3a	-	sphingomyelin phosphodiesterase, acid-like 3A	protein-coding
MACS_peak_1079	chr1	210836975	210837314	+	50.1	NA	Intergenic	L1_Rn|LINE|L1	-97544	NM_001130077	361669	Rn.220537	NM_001130077	ENSRNOG00000016737	Tcerg1l	RGD1562437	transcription elongation regulator 1-like	protein-coding
MACS_peak_3165	chr14	88129932	88130597	+	50.05	NA	Intergenic	RatSatRep2|Unknown|Unknown	-413366	NM_001271241	100911576	Rn.101929	NM_001271241	ENSRNOG00000050800	LOC100911576	-	heterogeneous nuclear ribonucleoproteins C1/C2-like	protein-coding
MACS_peak_5217	chr2	33698997	33699254	+	49.91	NA	Intergenic	L1_Rn|LINE|L1	129796	NM_020092	56763	Rn.53896	NM_020092	ENSRNOG00000032735	Srek1	Sfrs12|Srrp86|Srsf12	splicing regulatory glutamic acid and lysine rich protein 1	protein-coding
MACS_peak_6312	chr20	40882111	40882948	+	49.86	NA	Intergenic	Intergenic	103507	NM_001005539	294422	Rn.8142	NM_001005539	ENSRNOG00000000815	Smpdl3a	-	sphingomyelin phosphodiesterase, acid-like 3A	protein-coding
MACS_peak_1348	chr1	265469249	265469645	+	49.85	NA	Intergenic	CpG	29384	NM_133286	29349	Rn.73565	NM_133286	ENSRNOG00000017524	Fgf8	-	fibroblast growth factor 8	protein-coding
MACS_peak_9276	chr7	48295456	48295948	+	49.6	NA	Intergenic	L1_Rn|LINE|L1	-253754	NM_001108745	362876	Rn.208769	NM_001108745	ENSRNOG00000004353	Ppfia2	-	PTPRF interacting protein alpha 2	protein-coding
MACS_peak_7369	chr4	77401175	77401712	+	49.38	NA	Intergenic	CpG	-54432	NM_001134979	312299	Rn.9027	NM_001134979	ENSRNOG00000006048	Ezh2	-	enhancer of zeste 2 polycomb repressive complex 2 subunit	protein-coding
MACS_peak_54	chr1	11928477	11930569	+	49.28	NA	Intergenic	Intergenic	-14983	NM_001025002	310926		NM_001025002		LOC310926	Aa1011|Aa1262|Ab2-057|Ac1147	hypothetical protein LOC310926	protein-coding
MACS_peak_6581	chr3	60067191	60067660	+	49.22	NA	intron (NM_001107811, intron 10 of 15)	RatSatRep2|Unknown|Unknown	37817	NM_001107811	311730	Rn.2051	NM_001107811	ENSRNOG00000018485	Gpr155	-	G protein-coupled receptor 155	protein-coding
MACS_peak_2984	chr14	46633803	46634753	+	48.87	NA	intron (NM_147136, intron 1 of 5)	CpG	-2652	NM_001025002	310926		NM_001025002		LOC310926	Aa1011|Aa1262|Ab2-057|Ac1147	hypothetical protein LOC310926	protein-coding
MACS_peak_885	chr1	180718981	180719792	+	48.66	NA	Intergenic	SATI_RN|Satellite|Satellite	-1709129	NM_001013434	365355	Rn.3271	NM_001013434	ENSRNOG00000012258	Rras2	-	RAS related 2	protein-coding
MACS_peak_5664	chr2	147973383	147974001	+	48.09	NA	intron (NM_001109444, intron 4 of 9)	L1_Rat1|LINE|L1	-14125	NM_030873	81531	Rn.203100	NM_030873	ENSRNOG00000017427	Pfn2	-	profilin 2	protein-coding
MACS_peak_943	chr1	181259812	181260069	+	48	NA	Intergenic	SATI_RN|Satellite|Satellite	-2249683	NM_001013434	365355	Rn.3271	NM_001013434	ENSRNOG00000012258	Rras2	-	RAS related 2	protein-coding
MACS_peak_992	chr1	187609464	187609774	+	47.97	NA	Intergenic	(GTGA)n|Simple_repeat|Simple_repeat	156131	NM_053982	117053	Rn.2890	NM_053982	ENSRNOG00000018320	Rps15a	-	ribosomal protein S15a	protein-coding
MACS_peak_1849	chr11	10687482	10687769	+	47.92	NA	Intergenic	RatSatRep2|Unknown|Unknown	897909	NM_032106	84409	Rn.24350	NM_032106	ENSRNOG00000029598	Robo2	-	roundabout guidance receptor 2	protein-coding
MACS_peak_10164	chr9	12093819	12094166	+	47.74	NA	Intergenic	Intergenic	-539998	NM_001109414	680486	Rn.136288	NM_001109414	ENSRNOG00000023474	Dazl	-	deleted in azoospermia-like	protein-coding
MACS_peak_8730	chr6	79230735	79231089	+	47.71	NA	Intergenic	RatSatRep2|Unknown|Unknown	-23427	NM_012719	25033	Rn.42915	NM_012719	ENSRNOG00000048145	Sstr1	Gpcrrna	somatostatin receptor 1	protein-coding
MACS_peak_2983	chr14	46631657	46633429	+	47.7	NA	intron (NM_147136, intron 1 of 5)	CpG	-4387	NM_001025002	310926		NM_001025002		LOC310926	Aa1011|Aa1262|Ab2-057|Ac1147	hypothetical protein LOC310926	protein-coding
MACS_peak_2508	chr13	33528627	33529339	+	47.54	NA	Intergenic	ISAT_RN|Satellite|Satellite	722667	NM_021762	60381	Rn.156195	NM_021762	ENSRNOG00000002319	Tsn	-	translin	protein-coding
MACS_peak_7771	chr4	180140828	180141100	+	47.53	NA	Intergenic	Intergenic	78165	NM_001191753	312846	Rn.228969	NM_001191753	ENSRNOG00000015986	Rassf8	RGD1308820	Ras association domain family member 8	protein-coding
MACS_peak_7211	chr4	44905568	44906019	+	47.53	NA	Intergenic	(TGGTGG)n|Simple_repeat|Simple_repeat	-30497	NM_001009180	493810	Rn.17868	NM_001009180	ENSRNOG00000056207	Capza2	-	capping actin protein of muscle Z-line alpha subunit 2	protein-coding
MACS_peak_9462	chr7	102457959	102458418	+	47.48	NA	Intergenic	RatSatRep2|Unknown|Unknown	-128125	NM_012603	24577	Rn.12072	NM_012603		Myc	RNCMYC|c-myc|mMyc	MYC proto-oncogene, bHLH transcription factor	protein-coding
MACS_peak_10801	chrX	36450389	36451186	+	47.46	NA	intron (NM_001190994, intron 19 of 32)	intron (NM_001190994, intron 19 of 32)	475125	NM_001190994	678739	Rn.225026	NM_001190994		Phka2	-	phosphorylase kinase regulatory subunit alpha 2	protein-coding
MACS_peak_7599	chr4	130409846	130410307	+	47.4	NA	intron (NM_001191089, intron 7 of 9)	L1_Rn|LINE|L1	237220	NM_001191089	25094	Rn.31427	NM_001191089	ENSRNOG00000008658	Mitf	-	melanogenesis associated transcription factor	protein-coding
MACS_peak_10853	chrX	45153432	45154606	+	46.83	NA	Intergenic	RatSatRep2|Unknown|Unknown	-29749	NM_001033963	501563	Rn.16741	NM_001033963	ENSRNOG00000060168	Prkx	-	protein kinase, X-linked	protein-coding
MACS_peak_1311	chr1	256057076	256057369	+	46.75	NA	intron (NM_001169112, intron 8 of 21)	L1_Rn|LINE|L1	21356	NM_001169112	171304	Rn.58850	NM_001169112	ENSRNOG00000056069	Kif11	Knsl1	kinesin family member 11	protein-coding
MACS_peak_8184	chr5	113818817	113819435	+	46.59	NA	intron (NM_001105737, intron 12 of 22)	RatSatRep2|Unknown|Unknown	61785	NM_001039345	500502	Rn.126103	NM_001039345	ENSRNOG00000026323	Eqtn	Afaf	equatorin	protein-coding
MACS_peak_938	chr1	181198902	181199669	+	46.43	NA	Intergenic	ISAT_RN|Satellite|Satellite	-2189028	NM_001013434	365355	Rn.3271	NM_001013434	ENSRNOG00000012258	Rras2	-	RAS related 2	protein-coding
MACS_peak_1068	chr1	205303958	205304512	+	46.4	NA	Intergenic	RatSatRep2|Unknown|Unknown	-273670	NM_053335	81717	Rn.138124	NM_053335	ENSRNOG00000017326	Ctbp2	-	C-terminal binding protein 2	protein-coding
MACS_peak_6666	chr3	79492207	79492812	+	46.29	NA	Intergenic	L1_Rn|LINE|L1	-3730	NM_001107744	311182	Rn.21145	NM_001107744	ENSRNOG00000028215	Nup160	-	nucleoporin 160	protein-coding
MACS_peak_715	chr1	148307609	148308628	+	46.26	NA	Intergenic	RatSatRep2|Unknown|Unknown	-142095	NM_001037659	652956	Rn.189455	NM_001037659		Mpp1	p55	membrane palmitoylated protein 1	protein-coding
MACS_peak_4246	chr17	53518695	53519752	+	46.1	NA	intron (NM_001106117, intron 14 of 27)	RatSatRep2|Unknown|Unknown	194141	NM_053421	84481	Rn.47249	NM_053421	ENSRNOG00000049751	Arid4b	Bcaa	AT-rich interaction domain 4B	protein-coding
MACS_peak_904	chr1	180899636	180900164	+	46.06	NA	Intergenic	SATI_RN|Satellite|Satellite	-1889643	NM_001013434	365355	Rn.3271	NM_001013434	ENSRNOG00000012258	Rras2	-	RAS related 2	protein-coding
MACS_peak_10591	chrUn_KL568337v1	28537	28833	+	45.95	NA	NA	CpG	NA	NA
MACS_peak_856	chr1	177963946	177964196	+	45.9	NA	Intergenic	(AGTG)n|Simple_repeat|Simple_repeat	-74992	NM_024362	29657	Rn.14532	NM_024362	ENSRNOG00000014448	Arntl	Bmal1	aryl hydrocarbon receptor nuclear translocator-like	protein-coding
MACS_peak_4032	chr16	90665215	90666017	+	45.62	NA	Intergenic	(GGTTAG)n|Simple_repeat|Simple_repeat	340419	NM_017222	29500	Rn.85891	NM_017222	ENSRNOG00000037753	Slc10a2	ASBT|IBAT|ISBAT|ISBT	solute carrier family 10 member 2	protein-coding
MACS_peak_2954	chr14	46551873	46552727	+	45.58	NA	Intergenic	(CGAGAGAG)n|Simple_repeat|Simple_repeat	-84630	NM_001025002	310926		NM_001025002		LOC310926	Aa1011|Aa1262|Ab2-057|Ac1147	hypothetical protein LOC310926	protein-coding
MACS_peak_10603	chrUn_KL568391v1	10494	10785	+	45.55	NA	NA	Intergenic	NA	NA
MACS_peak_2204	chr12	10458112	10458481	+	45.53	NA	Intergenic	Intergenic	103039	NM_001109061	498140	Rn.1331	NM_001109061		Cdk8	RGD1560888	cyclin-dependent kinase 8	protein-coding
MACS_peak_4705	chr19	329388	329710	+	45.52	NA	Intergenic	Intergenic	-158161	NM_144743	246252	Rn.83638	NM_144743	ENSRNOG00000011330	Ces2a	Ces6	carboxylesterase 2A	protein-coding
MACS_peak_1446	chr10	12716694	12717642	+	45.39	NA	Intergenic	RatSatRep2|Unknown|Unknown	14729	NM_214828	287086	Rn.142193	NM_214828	ENSRNOG00000030412	Olr1378	-	olfactory receptor 1378	protein-coding
MACS_peak_9906	chr8	84511125	84511713	+	45	NA	Intergenic	RNHAL1|LINE|L1	-190705	NM_001005549	300846	Rn.43851	NM_001005549	ENSRNOG00000058120	Tinag	-	tubulointerstitial nephritis antigen	protein-coding
MACS_peak_2944	chr14	46531722	46532749	+	44.95	NA	Intergenic	Intergenic	-104695	NM_001025002	310926		NM_001025002		LOC310926	Aa1011|Aa1262|Ab2-057|Ac1147	hypothetical protein LOC310926	protein-coding
MACS_peak_9458	chr7	101322165	101322578	+	44.81	NA	Intergenic	RatSatRep2|Unknown|Unknown	-103308	NM_001008878	362921	Rn.214922	NM_001008878	ENSRNOG00000033584	LOC362921	-	Ac2-224	protein-coding
MACS_peak_7378	chr4	77447657	77448543	+	44.76	NA	Intergenic	(ACAACG)n|Simple_repeat|Simple_repeat	41435	NM_053849	116598	Rn.39305	NM_053849	ENSRNOG00000006228	Pdia4	ERp-72|Erp70|Erp72	protein disulfide isomerase family A, member 4	protein-coding
MACS_peak_1967	chr11	43976936	43977566	+	44.75	NA	Intergenic	RatSatRep2|Unknown|Unknown	15452	NM_001006955	288182	Rn.101823	NM_001006955	ENSRNOG00000001657	Cldnd1	-	claudin domain containing 1	protein-coding
MACS_peak_2829	chr14	12755100	12755427	+	44.7	NA	Intergenic	L1_Rn|LINE|L1	240321	NM_022211	60662	Rn.44445	NM_022211	ENSRNOG00000022631	Fgf5	-	fibroblast growth factor 5	protein-coding
MACS_peak_2147	chr11	90323213	90323742	+	44.6	NA	Intergenic	L1_Rn|LINE|L1	83253	NM_013035	25554	Rn.43117	NM_013035	ENSRNOG00000047699	Snai2	Slug	snail family transcriptional repressor 2	protein-coding
MACS_peak_9574	chr7	132571999	132572323	+	44.56	NA	intron (NM_133611, intron 4 of 9)	L1_Rn|LINE|L1	185397	NM_133611	171147	Rn.7568	NM_133611	ENSRNOG00000015741	Slc2a13	Hmit	solute carrier family 2 member 13	protein-coding
MACS_peak_10659	chrX	5509019	5509494	+	44.47	NA	Intergenic	L1_Rn|LINE|L1	-40212	NM_001025027	363442	Rn.22678	NM_001025027	ENSRNOG00000003470	Fundc1	-	FUN14 domain containing 1	protein-coding
MACS_peak_346	chr1	59448216	59448595	+	44.21	NA	Intergenic	L1_Rn|LINE|L1	-64061	NM_001113403	171105	Rn.10614	NM_133574	ENSRNOG00000047387	Lnpep	GP160|IRAP|OTase|P-LAP|Vp165	leucyl and cystinyl aminopeptidase	protein-coding
MACS_peak_9057	chr7	9549500	9549821	+	44.19	NA	Intergenic	RatSatRep2|Unknown|Unknown	42340	NM_001000063	288823	Rn.138131	NM_001000063	ENSRNOG00000008464	Olr1071	ratchr7-8424998-8424057_ORF	olfactory receptor 1071	protein-coding
MACS_peak_10980	chrX	79710749	79711020	+	44.17	NA	Intergenic	L1_Rn|LINE|L1	164260	NM_001106935	302366	Rn.218687	NM_001106935	ENSRNOG00000033458	RGD1562871	-	similar to BMI1-like protein	protein-coding
MACS_peak_7380	chr4	77452596	77453257	+	44.1	NA	Intergenic	CpG	36609	NM_053849	116598	Rn.39305	NM_053849	ENSRNOG00000006228	Pdia4	ERp-72|Erp70|Erp72	protein disulfide isomerase family A, member 4	protein-coding
MACS_peak_7370	chr4	77401869	77403194	+	44.02	NA	Intergenic	RMER12B|LTR|ERVK	-55520	NM_001134979	312299	Rn.9027	NM_001134979	ENSRNOG00000006048	Ezh2	-	enhancer of zeste 2 polycomb repressive complex 2 subunit	protein-coding
MACS_peak_2161	chr12	1510113	1510702	+	43.94	NA	TTS (NR_033176)	TTS (NR_033176)	110	NR_033176	24720		NR_033176	ENSRNOG00000050259	Rn5s	Rn5s2	5S RNA	rRNA
MACS_peak_2953	chr14	46549041	46550377	+	43.91	NA	Intergenic	Intergenic	-87221	NM_001025002	310926		NM_001025002		LOC310926	Aa1011|Aa1262|Ab2-057|Ac1147	hypothetical protein LOC310926	protein-coding
MACS_peak_10841	chrX	43581175	43581510	+	43.84	NA	intron (NM_001013960, intron 3 of 14)	RatSatRep2|Unknown|Unknown	10858	NM_001013960	302640	Rn.8792	NM_001013960	ENSRNOG00000003782	Acot9	Acate2	acyl-CoA thioesterase 9	protein-coding
MACS_peak_2892	chr14	32925509	32926031	+	43.82	NA	Intergenic	RNHAL1|LINE|L1	-84530	NM_001013048	289560	Rn.203012	NM_001013048	ENSRNOG00000002050	Igfbp7	-	insulin-like growth factor binding protein 7	protein-coding
MACS_peak_4201	chr17	45115762	45116614	+	43.82	NA	Intergenic	L1_Rn2|LINE|L1	37632	NM_001100574	306974	Rn.69941	NM_001100574	ENSRNOG00000053635	Zkscan8	Zfp192	zinc finger with KRAB and SCAN domains 8	protein-coding
MACS_peak_933	chr1	181169037	181169400	+	43.68	NA	Intergenic	ISAT_RN|Satellite|Satellite	-2158961	NM_001013434	365355	Rn.3271	NM_001013434	ENSRNOG00000012258	Rras2	-	RAS related 2	protein-coding
MACS_peak_4395	chr18	8868554	8869334	+	43.65	NA	Intergenic	RatSatRep2|Unknown|Unknown	-502919	NM_031333	83501	Rn.23200	NM_031333	ENSRNOG00000015602	Cdh2	N-cadherin	cadherin 2	protein-coding
MACS_peak_9452	chr7	100304367	100305046	+	43.61	NA	Intergenic	SATI_RN|Satellite|Satellite	78191	NM_001145141	500876	Rn.141036	NM_001145141	ENSRNOG00000004914	LOC500876	-	LOC500876	protein-coding
MACS_peak_2176	chr12	3652517	3652804	+	43.59	NA	Intergenic	ISAT_RN|Satellite|Satellite	-316833	NM_001099466	288396	Rn.195584	NM_001099466	ENSRNOG00000045674	Vom2r59	RGD1566381	vomeronasal 2 receptor, 59	protein-coding
MACS_peak_7718	chr4	166272120	166272817	+	43.58	NA	intron (NM_012632, intron 5 of 5)	RatSatRep2|Unknown|Unknown	60821	NM_012632	24687	Rn.9841	NM_012632	ENSRNOG00000028983	Prp15	Prp|Prpb|RATRP13|Rp13	proline-rich protein 15	protein-coding
MACS_peak_65	chr1	11948264	11949071	+	43.53	NA	Intergenic	Intergenic	-21424	NR_046238	100861534		NR_046238	ENSRNOG00000059852	Rn5-8s	-	5.8S ribosomal RNA	rRNA
MACS_peak_5165	chr2	16696641	16696930	+	43.5	NA	Intergenic	RatSatRep2|Unknown|Unknown	-1657757	NM_019189	29331	Rn.50531	NM_019189	ENSRNOG00000032002	Hapln1	Crtl1	hyaluronan and proteoglycan link protein 1	protein-coding
MACS_peak_6879	chr3	134034393	134034661	+	43.4	NA	Intergenic	SATI_RN|Satellite|Satellite	372033	NM_001014049	311470	Rn.110539	NM_001014049	ENSRNOG00000004852	Sel1l2	RGD1311278	SEL1L2 ERAD E3 ligase adaptor subunit	protein-coding
MACS_peak_2710	chr13	89440120	89441977	+	43.34	NA	Intergenic	CpG	-39010	NM_001109075	498278	Rn.7902	NM_001109075	ENSRNOG00000034221	Cfap126	RGD1562658	cilia and flagella associated protein 126	protein-coding
MACS_peak_9141	chr7	20012933	20013243	+	43.1	NA	Intergenic	RatSatRep2|Unknown|Unknown	-924116	NM_001099474	299683	Rn.198782	NM_001099474	ENSRNOG00000039136	Vom2r57	RGD1562007	vomeronasal 2 receptor, 57	protein-coding
MACS_peak_2507	chr13	33514930	33515298	+	43.05	NA	Intergenic	ISAT_RN|Satellite|Satellite	736536	NM_021762	60381	Rn.156195	NM_021762	ENSRNOG00000002319	Tsn	-	translin	protein-coding
MACS_peak_3462	chr15	49388610	49389251	+	42.63	NA	Intergenic	RatSatRep2|Unknown|Unknown	78244	NM_020301	29641	Rn.10357	NM_020301	ENSRNOG00000014054	Adam7	ADAM|ADAM 7|EAP|EAP I|EAPI|I	ADAM metallopeptidase domain 7	protein-coding
MACS_peak_10943	chrX	68359203	68359712	+	42.5	NA	intron (NM_001107848, intron 8 of 25)	RatSatRep2|Unknown|Unknown	203680	NM_001107848	312108	Rn.51010	NM_001107848	ENSRNOG00000026573	Ophn1	Opn1	oligophrenin 1	protein-coding
MACS_peak_10268	chr9	40522483	40522791	+	42.46	NA	Intergenic	Intergenic	-449452	NM_001013111	301333	Rn.9310	NM_001013111	ENSRNOG00000013415	Ptpn18	PTP20	protein tyrosine phosphatase, non-receptor type 18	protein-coding
MACS_peak_11543	chrY_KL568162v1_random	4689679	4690261	+	42.46	NA	NA	RatSatRep2|Unknown|Unknown	NA	NA
MACS_peak_7635	chr4	143106813	143107095	+	42.39	NA	intron (NM_031040, intron 7 of 9)	L1_Rn|LINE|L1	654338	NM_031040	81672	Rn.10409	NM_031040	ENSRNOG00000005662	Grm7	-	glutamate metabotropic receptor 7	protein-coding
MACS_peak_549	chr1	99055935	99056833	+	42.35	NA	intron (NM_001099487, intron 4 of 4)	intron (NM_001099487, intron 4 of 4)	79593	NM_001099487	690356	Rn.217935	NM_001099487	ENSRNOG00000043280	Vom2r37	-	vomeronasal 2 receptor, 37	protein-coding
MACS_peak_957	chr1	182011971	182012222	+	42.26	NA	Intergenic	SATI_RN|Satellite|Satellite	1717473	NM_080781	114023	Rn.4327	NM_080781	ENSRNOG00000057623	Copb1	-	coatomer protein complex, subunit beta 1	protein-coding
MACS_peak_1412	chr10	2922595	2922815	+	42.23	NA	Intergenic	(CTAACC)n|Simple_repeat|Simple_repeat	-256641	NM_001135846	304714	Rn.159763	NM_001135846	ENSRNOG00000003326	Rrn3	RGD1305001	RRN3 homolog, RNA polymerase I transcription factor	protein-coding
MACS_peak_11056	chrX	106168344	106168603	+	42.05	NA	Intergenic	Intergenic	-102246	NM_001037216	501621	Rn.24735	NM_001037216	ENSRNOG00000023256	Nxf7	-	nuclear RNA export factor 7	protein-coding
MACS_peak_2401	chr13	2809262	2809567	+	42.03	NA	Intergenic	L1_Rn|LINE|L1	-860851	NM_001305281	297865		NM_001305281	ENSRNOG00000032307	Dsel	RGD1307724	dermatan sulfate epimerase-like	protein-coding
MACS_peak_5847	chr2	193572249	193573431	+	42.02	NA	Intergenic	Intergenic	-237838	NM_001109500	688413	Rn.133217	NM_001109500	ENSRNOG00000009581	Lce1m	-	late cornified envelope 1M	protein-coding
MACS_peak_7868	chr5	25070843	25071292	+	42.02	NA	intron (NM_001107915, intron 3 of 24)	RatSatRep2|Unknown|Unknown	28295	NM_001107915	313061	Rn.102580	NM_001107915	ENSRNOG00000014664	Virma	RGD1559904	vir like m6A methyltransferase associated	protein-coding
MACS_peak_485	chr1	83557166	83558077	+	41.76	NA	intron (NM_017156, intron 9 of 10)	RatSatRep2|Unknown|Unknown	46454	NM_017156	29295	Rn.144570	NM_017156	ENSRNOG00000031529	Cyp2b12	Cyp2b15	cytochrome P450, family 2, subfamily b, polypeptide 12	protein-coding
MACS_peak_8162	chr5	106857009	106857618	+	41.73	NA	Intergenic	L1_Rn|LINE|L1	8433	NM_019127	24481	Rn.138105	NM_019127	ENSRNOG00000006268	Ifnb1	Ifnb	interferon beta 1	protein-coding
MACS_peak_3017	chr14	48022582	48023084	+	41.6	NA	Intergenic	SATI_RN|Satellite|Satellite	-146896	NM_001271306	686295	Rn.3259	NM_001271306	ENSRNOG00000048441	Wdr82	-	WD repeat domain 82	protein-coding
MACS_peak_7782	chr5	945789	946165	+	41.52	NA	Intergenic	RatSatRep2|Unknown|Unknown	-126744	NM_001106917	301489	Rn.109878	NM_001106917	ENSRNOG00000017686	Pi15	-	peptidase inhibitor 15	protein-coding
MACS_peak_6314	chr20	40898536	40898936	+	41.47	NA	Intergenic	Intergenic	119714	NM_001005539	294422	Rn.8142	NM_001005539	ENSRNOG00000000815	Smpdl3a	-	sphingomyelin phosphodiesterase, acid-like 3A	protein-coding
MACS_peak_908	chr1	180912643	180913023	+	41.45	NA	Intergenic	SATI_RN|Satellite|Satellite	-1902576	NM_001013434	365355	Rn.3271	NM_001013434	ENSRNOG00000012258	Rras2	-	RAS related 2	protein-coding
MACS_peak_8062	chr5	74857606	74858171	+	41.44	NA	Intergenic	RatSatRep2|Unknown|Unknown	-84203	NM_001011974	298024	Rn.101657	NM_001011974	ENSRNOG00000011504	Akap2	AKAP-2	A-kinase anchoring protein 2	protein-coding
MACS_peak_2957	chr14	46554875	46555103	+	41.44	NA	Intergenic	Intergenic	-81941	NM_001025002	310926		NM_001025002		LOC310926	Aa1011|Aa1262|Ab2-057|Ac1147	hypothetical protein LOC310926	protein-coding
MACS_peak_5	chr1	270799	271028	+	41.39	NA	Intergenic	(CCCTAA)n|Simple_repeat|Simple_repeat	-125787	NM_001099460	502213	Rn.217622	NM_001099460		Vom2r3	RGD1565892	vomeronasal 2 receptor, 3	protein-coding
MACS_peak_2503	chr13	33488766	33489224	+	41.35	NA	Intergenic	SATI_RN|Satellite|Satellite	762655	NM_021762	60381	Rn.156195	NM_021762	ENSRNOG00000002319	Tsn	-	translin	protein-coding
MACS_peak_9432	chr7	95230935	95231383	+	41.28	NA	intron (NM_001130548, intron 40 of 47)	RatSatRep2|Unknown|Unknown	-78769	NM_001130717	500870	Rn.34858	NM_001130717	ENSRNOG00000004412	Mtbp	RGD1565672	MDM2 binding protein	protein-coding
MACS_peak_2003	chr11	52337090	52337781	+	41.28	NA	Intergenic	RatSatRep2|Unknown|Unknown	-743590	NM_001079938	303970	Rn.229412	NM_001079938	ENSRNOG00000001971	Bbx	-	BBX, HMG-box containing	protein-coding
MACS_peak_3015	chr14	47988925	47989178	+	41.28	NA	Intergenic	ISAT_RN|Satellite|Satellite	-180678	NM_001271306	686295	Rn.3259	NM_001271306	ENSRNOG00000048441	Wdr82	-	WD repeat domain 82	protein-coding
MACS_peak_8545	chr6	31056376	31056649	+	41.2	NA	Intergenic	Intergenic	-417223	NM_147136	257642		NM_147136		LOC257642	ribin	rRNA promoter binding protein	protein-coding
MACS_peak_4693	chr18	87751594	87751830	+	41.15	NA	Intergenic	SATI_RN|Satellite|Satellite	-873570	NM_001191943	498898	Rn.225508	NM_001191943	ENSRNOG00000038190	Dok6	RGD1564376	docking protein 6	protein-coding
MACS_peak_9567	chr7	131347023	131347776	+	40.97	NA	Intergenic	RNHAL1|LINE|L1	16486	NM_139101	245960	Rn.234407	NM_139101	ENSRNOG00000014511	Alg10	Alg10b|KCR1	ALG10, alpha-1,2-glucosyltransferase	protein-coding
MACS_peak_6617	chr3	70798784	70799567	+	40.97	NA	Intergenic	RatSatRep2|Unknown|Unknown	-221359	NM_001010963	362154	Rn.129005	NM_001010963	ENSRNOG00000005256	Zc3h15	-	zinc finger CCCH-type containing 15	protein-coding
MACS_peak_9258	chr7	45684883	45685403	+	40.81	NA	Intergenic	L1_Rn|LINE|L1	356918	NM_172321	282712	Rn.9716	NM_172321	ENSRNOG00000027468	Slc6a15	Ntt73	solute carrier family 6 member 15	protein-coding
MACS_peak_9192	chr7	27579340	27579616	+	40.79	NA	Intergenic	Intergenic	-27400	NM_001246357	282580	Rn.127827	NM_001246357	ENSRNOG00000038948	Stab2	FEEL-2|Hare|RGD1560941	stabilin 2	protein-coding
MACS_peak_4663	chr18	79163618	79164343	+	40.72	NA	Intergenic	L1_Rn|LINE|L1	94587	NM_012958	50577		NM_012958	ENSRNOG00000016654	Galr1	Galnr1	galanin receptor 1	protein-coding
MACS_peak_7333	chr4	69554313	69555027	+	40.72	NA	Intergenic	RatSatRep2|Unknown|Unknown	-286334	NM_173127	286911	Rn.9817	NM_173127	ENSRNOG00000013382	Prss3	Try3	protease, serine, 3	protein-coding
MACS_peak_11025	chrX	97887679	97888407	+	40.35	NA	Intergenic	L1_Rn|LINE|L1	813333	NM_001106968	302776	Rn.218606	NM_001106968	ENSRNOG00000042823	RGD1561230	-	similar to RIKEN cDNA 4921511C20 gene	protein-coding
MACS_peak_6629	chr3	72925662	72926444	+	40.19	NA	Intergenic	RatSatRep2|Unknown|Unknown	-48221	NM_001000285	295715	Rn.142987	NM_001000285	ENSRNOG00000050082	Olr443	-	olfactory receptor 443	protein-coding
MACS_peak_11454	chrY_KL568157v1_random	3373687	3374432	+	40.11	NA	NA	L1_Rn|LINE|L1	NA	NA
MACS_peak_11041	chrX	101806351	101806939	+	40.1	NA	Intergenic	RatSatRep2|Unknown|Unknown	2687069	NM_001169129	317183	Rn.24970	NM_001169129	ENSRNOG00000003929	Pcdh19	RGD1565392	protocadherin 19	protein-coding
MACS_peak_3874	chr16	51628565	51629218	+	40.07	NA	Intergenic	RNHAL1|LINE|L1	-121899	NM_001135090	685846	Rn.145279	NM_001135090		Adam34	Adam26b	a disintegrin and metallopeptidase domain 34	protein-coding
MACS_peak_1172	chr1	225342209	225343381	+	40.07	NA	Intergenic	RatSatRep2|Unknown|Unknown	-13052	NM_145089	246307	Rn.22774	NM_145089	ENSRNOG00000020202	Asrgl1	Gliap|Hiob2	asparaginase like 1	protein-coding
MACS_peak_8538	chr6	31046666	31046996	+	39.94	NA	Intergenic	RNLTR3-int|LTR|ERVK	-407542	NM_147136	257642		NM_147136		LOC257642	ribin	rRNA promoter binding protein	protein-coding
MACS_peak_4222	chr17	49358070	49358469	+	39.82	NA	intron (NM_001101002, intron 5 of 14)	RatSatRep2|Unknown|Unknown	-252279	NM_001107356	306994	Rn.8045	NM_001107356	ENSRNOG00000013438	Yae1d1	RGD1306613	Yae1 domain containing 1	protein-coding
MACS_peak_2978	chr14	46620072	46620948	+	39.79	NA	intron (NM_147136, intron 1 of 5)	B1_Mur3|SINE|Alu	-16420	NM_001025002	310926		NM_001025002		LOC310926	Aa1011|Aa1262|Ab2-057|Ac1147	hypothetical protein LOC310926	protein-coding
MACS_peak_7875	chr5	27866650	27867169	+	39.54	NA	Intergenic	RatSatRep2|Unknown|Unknown	264224	NM_001106638	297910	Rn.109484	NM_001106638	ENSRNOG00000006096	Slc26a7	-	solute carrier family 26 member 7	protein-coding
MACS_peak_10233	chr9	29526718	29526964	+	39.49	NA	Intergenic	CpG	-15794	NR_031843	100314011		NR_031843	ENSRNOG00000035646	Mir30a	rno-mir-30a	microRNA 30a	ncRNA
MACS_peak_648	chr1	132908463	132909072	+	39.47	NA	Intergenic	RatSatRep2|Unknown|Unknown	594386	NM_001191625	308742	Rn.220729	NM_001191625	ENSRNOG00000009932	Mctp2	RGD1562967	multiple C2 and transmembrane domain containing 2	protein-coding
MACS_peak_4722	chr19	5824010	5824251	+	39.44	NA	Intergenic	BC1_Rn|scRNA|scRNA	-207805	NM_053393	84408	Rn.214220	NM_053393	ENSRNOG00000056643	Cdh8	-	cadherin 8	protein-coding
MACS_peak_2319	chr12	32382221	32382484	+	39.43	NA	intron (NM_198727, intron 3 of 9)	RatSatRep2|Unknown|Unknown	-371472	NM_144758	246280	Rn.10770	NM_144758	ENSRNOG00000000962	Slc15a4	-	solute carrier family 15 member 4	protein-coding
MACS_peak_7091	chr4	24268753	24269093	+	39.36	NA	Intergenic	L1_Rn|LINE|L1	-343264	NM_001025632	289752	Rn.52785	NM_001025632	ENSRNOG00000009437	Ewsr1	-	EWS RNA-binding protein 1	protein-coding
MACS_peak_1608	chr10	60124890	60125176	+	39.22	NA	TTS (NM_001000943)	TTS (NM_001000943)	1669	NM_001000943	405285	Rn.142095	NM_001000943		Olr1474	-	olfactory receptor 1474	protein-coding
MACS_peak_4328	chr17	83958628	83958877	+	39.21	NA	Intergenic	L1_Rn|LINE|L1	288286	NM_001191694	307189	Rn.234519	NM_001191694	ENSRNOG00000049452	Nebl	Lasp-2	nebulette	protein-coding
MACS_peak_224	chr1	44537211	44537783	+	39.13	NA	Intergenic	RatSatRep2|Unknown|Unknown	-62823	NM_181474	308140	Rn.62385	NM_181474	ENSRNOG00000056223	Tfb1m	-	transcription factor B1, mitochondrial	protein-coding
MACS_peak_9162	chr7	22336728	22336959	+	38.89	NA	Intergenic	SATI_RN|Satellite|Satellite	606316	NM_001099484	503127	Rn.217634	NM_001099484		Vom2r56	RGD1559561	vomeronasal 2 receptor, 56	protein-coding
MACS_peak_6824	chr3	120703295	120703839	+	38.89	NA	intron (NM_001106508, intron 19 of 19)	L1_Rn|LINE|L1	-23339	NM_171988	64547	Rn.82709	NM_022612	ENSRNOG00000016551	Bcl2l11	Bim|BimL|Bod	BCL2 like 11	protein-coding
MACS_peak_4438	chr18	20562852	20563261	+	38.86	NA	Intergenic	RatSatRep2|Unknown|Unknown	-1287783	NM_001287621	102547344		NM_001287621	ENSRNOG00000030156	LOC102547344	LRRGT00172	lateral signaling target protein 2 homolog	protein-coding
MACS_peak_5393	chr2	77426927	77427193	+	38.86	NA	Intergenic	L1_Rat1|LINE|L1	205566	NM_022300	64160	Rn.37779	NM_022300		Basp1	NAP22	brain abundant, membrane attached signal protein 1	protein-coding
MACS_peak_9758	chr8	39957304	39957636	+	38.82	NA	Intergenic	L1_Rn|LINE|L1	-40405	NM_001004245	300519	Rn.17089	NM_001004245	ENSRNOG00000033217	Esam	-	endothelial cell adhesion molecule	protein-coding
MACS_peak_4249	chr17	53816569	53818144	+	38.78	NA	Intergenic	RatSatRep2|Unknown|Unknown	-103992	NM_053421	84481	Rn.47249	NM_053421	ENSRNOG00000049751	Arid4b	Bcaa	AT-rich interaction domain 4B	protein-coding
MACS_peak_4366	chr18	1243128	1243428	+	38.72	NA	Intergenic	RatSatRep2|Unknown|Unknown	-26899	NM_001008301	291796	Rn.11790	NM_001008301	ENSRNOG00000014981	Usp14	-	ubiquitin specific peptidase 14	protein-coding
MACS_peak_5658	chr2	146854822	146855221	+	38.72	NA	Intergenic	RatSatRep2|Unknown|Unknown	537041	NM_001106434	295061	Rn.24712	NM_001106434	ENSRNOG00000015812	Tm4sf1	-	transmembrane 4 L six family member 1	protein-coding
MACS_peak_4009	chr16	83696524	83696841	+	38.72	NA	Intergenic	Intergenic	-127833	NM_001168633	29376	Rn.10718	NM_001168633	ENSRNOG00000023509	Irs2	4PS|IRS-2	insulin receptor substrate 2	protein-coding
MACS_peak_8698	chr6	71825142	71826379	+	38.68	NA	Intergenic	RatSatRep2|Unknown|Unknown	-266434	NM_001106726	299002	Rn.126080	NM_001106726	ENSRNOG00000004232	G2e3	RGD1310263	G2/M-phase specific E3 ubiquitin protein ligase	protein-coding
MACS_peak_193	chr1	38434009	38434356	+	38.52	NA	Intergenic	Intergenic	-195180	NR_037334	100526572		NR_037334	ENSRNOG00000035509	Mir3556b	rno-mir-3556b	microRNA 3556b	ncRNA
MACS_peak_7149	chr4	31452103	31452898	+	38.49	NA	Intergenic	(ACCACCACC)n|Simple_repeat|Simple_repeat	65080	NM_022396	64199	Rn.892	NM_022396	ENSRNOG00000047914	Gng11	-	guanine nucleotide binding protein (G protein), gamma 11	protein-coding
MACS_peak_3490	chr15	54600867	54601342	+	38.46	NA	Intergenic	L1_Rn|LINE|L1	-72624	NM_001107278	306022		NM_001107278	ENSRNOG00000014478	Fndc3a	Fndc3	fibronectin type III domain containing 3a	protein-coding
MACS_peak_7258	chr4	54485678	54485986	+	38.46	NA	intron (NM_022202, intron 8 of 9)	L1_Rn|LINE|L1	696633	NR_032747	100314270		NR_032747	ENSRNOG00000036461	Mir592	rno-mir-592	microRNA 592	ncRNA
MACS_peak_6656	chr3	77470986	77472263	+	38.46	NA	Intergenic	RatSatRep2|Unknown|Unknown	11698	NM_001000925	405243	Rn.142840	NM_001000925	ENSRNOG00000046340	Olr661	-	olfactory receptor 661	protein-coding
MACS_peak_5032	chr2	1700770	1701106	+	38.4	NA	Intergenic	L1_Rat1|LINE|L1	-139474	NM_001033716	25403	Rn.17481	NM_053295	ENSRNOG00000010286	Cast	-	calpastatin	protein-coding
MACS_peak_10710	chrX	16512244	16512517	+	38.29	NA	Intergenic	L1_Rn|LINE|L1	-206302	NM_024402	79254	Rn.10777	NM_024402	ENSRNOG00000002921	Akap4	-	A-kinase anchoring protein 4	protein-coding
MACS_peak_10804	chrX	36467520	36467756	+	38.19	NA	intron (NM_001190994, intron 19 of 32)	intron (NM_001190994, intron 19 of 32)	458274	NM_001190994	678739	Rn.225026	NM_001190994		Phka2	-	phosphorylase kinase regulatory subunit alpha 2	protein-coding
MACS_peak_1325	chr1	260646448	260646729	+	38.14	NA	Intergenic	RatSatRep2|Unknown|Unknown	-7772	NM_001106368	294048	Rn.15411	NM_001106368	ENSRNOG00000013309	Pik3ap1	-	phosphoinositide-3-kinase adaptor protein 1	protein-coding
MACS_peak_117	chr1	22610771	22611016	+	38.04	NA	Intergenic	(CTAACC)n|Simple_repeat|Simple_repeat	14241	NM_001025623	29142	Rn.16319	NM_001025623	ENSRNOG00000016219	Vnn1	Tiff66	vanin 1	protein-coding
MACS_peak_1274	chr1	248909560	248910093	+	38.01	NA	Intergenic	RNHAL1|LINE|L1	-11251	NM_001106350	293897	Rn.214343	NM_001106350	ENSRNOG00000011692	Dkk1	-	dickkopf WNT signaling pathway inhibitor 1	protein-coding
MACS_peak_9627	chr7	144869247	144869512	+	38.01	NA	3' UTR (NM_017248, exon 10 of 11)	3' UTR (NM_017248, exon 10 of 11)	3739	NM_017248	29578	Rn.25771	NM_017248	ENSRNOG00000036839	Hnrnpa1	Hnrpa1|hnRNP A1	heterogeneous nuclear ribonucleoprotein A1	protein-coding
MACS_peak_5831	chr2	186353933	186354566	+	37.94	NA	Intergenic	RatSatRep2|Unknown|Unknown	-20444	NM_017079	25109	Rn.11120	NM_017079	ENSRNOG00000016451	Cd1d1	Cd1|Cd1d	CD1d1 molecule	protein-coding
MACS_peak_1318	chr1	259164229	259164510	+	37.9	NA	Intergenic	L1_Rn|LINE|L1	-74737	NM_001108524	361755	Rn.3148	NM_001108524	ENSRNOG00000060047	Aldh18a1	Pycs	aldehyde dehydrogenase 18 family, member A1	protein-coding
MACS_peak_6564	chr3	52956075	52956987	+	37.88	NA	Intergenic	RatSatRep2|Unknown|Unknown	-106620	NM_031686	64155	Rn.54541	NM_031686	ENSRNOG00000029342	Scn7a	Na-G|Scn6a	sodium voltage-gated channel alpha subunit 7	protein-coding
MACS_peak_10138	chr9	8376725	8377408	+	37.86	NA	Intergenic	Intergenic	321014	NM_001007558	450235	Rn.162355	NM_001007558	ENSRNOG00000050325	Adgre4	Adgre4p|Emr4|Emr4p	adhesion G protein-coupled receptor E4	protein-coding
MACS_peak_930	chr1	181077240	181077760	+	37.85	NA	Intergenic	ISAT_RN|Satellite|Satellite	-2067243	NM_001013434	365355	Rn.3271	NM_001013434	ENSRNOG00000012258	Rras2	-	RAS related 2	protein-coding
MACS_peak_11287	chrY	2692986	2693513	+	37.84	NA	Intergenic	L1_Rn|LINE|L1	-1289827	NM_001329902	103694559		NM_001329902	ENSRNOG00000058664	Usp9y	-	ubiquitin specific peptidase 9, Y-linked	protein-coding
MACS_peak_58	chr1	11937994	11938571	+	37.83	NA	Intergenic	RNLTR3-int|LTR|ERVK	-23742	NM_001025002	310926		NM_001025002		LOC310926	Aa1011|Aa1262|Ab2-057|Ac1147	hypothetical protein LOC310926	protein-coding
MACS_peak_2881	chr14	28440890	28441096	+	37.81	NA	intron (NM_130822, intron 19 of 24)	SATI_RN|Satellite|Satellite	415322	NM_130822	170641	Rn.203386	NM_130822	ENSRNOG00000030149	Adgrl3	Cirl3|Lec3|Lphn3	adhesion G protein-coupled receptor L3	protein-coding
MACS_peak_4365	chr18	1242280	1242642	+	37.81	NA	Intergenic	RatSatRep2|Unknown|Unknown	-26082	NM_001008301	291796	Rn.11790	NM_001008301	ENSRNOG00000014981	Usp14	-	ubiquitin specific peptidase 14	protein-coding
MACS_peak_9957	chr8	96906023	96906419	+	37.81	NA	Intergenic	L1_Rn|LINE|L1	176886	NM_001004249	300888	Rn.98226	NM_001004249	ENSRNOG00000013889	Tmed3	-	transmembrane p24 trafficking protein 3	protein-coding
MACS_peak_2943	chr14	46530878	46531275	+	37.75	NA	Intergenic	RNLTR4-int|LTR|ERVK	-105854	NM_001025002	310926		NM_001025002		LOC310926	Aa1011|Aa1262|Ab2-057|Ac1147	hypothetical protein LOC310926	protein-coding
MACS_peak_7342	chr4	70876339	70876695	+	37.74	NA	Intergenic	L1_Rn|LINE|L1	-26736	NM_001107857	312275	Rn.125930	NM_001107857	ENSRNOG00000014367	Ephb6	-	Eph receptor B6	protein-coding
MACS_peak_5661	chr2	147325864	147326386	+	37.74	NA	Intergenic	RNHAL1|LINE|L1	65937	NM_001106434	295061	Rn.24712	NM_001106434	ENSRNOG00000015812	Tm4sf1	-	transmembrane 4 L six family member 1	protein-coding
MACS_peak_354	chr1	60308348	60309417	+	37.74	NA	Intergenic	RatSatRep2|Unknown|Unknown	60187	NM_001167548	100312667	Rn.222400	NM_001167548		Vom1r13	-	vomeronasal 1 receptor 13	protein-coding
MACS_peak_10661	chrX	5641839	5642177	+	37.67	NA	Intergenic	L1_Rn|LINE|L1	92540	NM_001025027	363442	Rn.22678	NM_001025027	ENSRNOG00000003470	Fundc1	-	FUN14 domain containing 1	protein-coding
MACS_peak_8559	chr6	32404266	32404529	+	37.63	NA	Intergenic	RatSatRep2|Unknown|Unknown	-772429	NM_019287	54225	Rn.33815	NM_019287	ENSRNOG00000005542	Apob	Aa1064|Ac1-060|Apo B-100|ApoB-100|ApoB-48	apolipoprotein B	protein-coding
MACS_peak_4767	chr19	16270599	16270901	+	37.56	NA	Intergenic	RatSatRep2|Unknown|Unknown	145036	NR_132649	106456572	Rn.39276	NR_132649		Crnde	-	colorectal neoplasia differentially expressed	ncRNA
MACS_peak_5446	chr2	91365836	91366345	+	37.43	NA	Intergenic	RatSatRep2|Unknown|Unknown	131001	NM_017091	25204	Rn.11384	NM_017091	ENSRNOG00000011107	Pcsk1	BDP|PC1|PC3	proprotein convertase subtilisin/kexin type 1	protein-coding
MACS_peak_6513	chr3	37771886	37772127	+	37.36	NA	Intergenic	L1_Rat1|LINE|L1	175428	NM_053979	117050	Rn.2803	NM_053979	ENSRNOG00000006839	Arl5a	Arl5	ADP-ribosylation factor like GTPase 5A	protein-coding
MACS_peak_5860	chr2	197079708	197079921	+	37.36	NA	Intergenic	SATI_RN|Satellite|Satellite	424345	NM_031560	29175	Rn.5598	NM_031560	ENSRNOG00000021155	Ctsk	-	cathepsin K	protein-coding
MACS_peak_4611	chr18	59152565	59153108	+	37.32	NA	intron (NM_023975, intron 11 of 26)	L1_Rn|LINE|L1	44210	NM_023975	66031	Rn.211985	NM_023975	ENSRNOG00000018387	Wdr7	Trag|Wd7	WD repeat domain 7	protein-coding
MACS_peak_4045	chr17	4314836	4315149	+	37.27	NA	intron (NM_001107335, intron 19 of 25)	L1_Rn|LINE|L1	102102	NM_173132	286916	Rn.10029	NM_173132	ENSRNOG00000018028	Testin	-	testin gene	protein-coding
MACS_peak_7195	chr4	43109822	43110167	+	37.27	NA	Intergenic	RatSatRep2|Unknown|Unknown	-13595	NM_001114401	282587	Rn.16244	NM_001114401	ENSRNOG00000061845	Cttnbp2	Cbp90|Cortbp2	cortactin binding protein 2	protein-coding
MACS_peak_11107	chrX	118164628	118165179	+	37.27	NA	intron (NM_012765, intron 2 of 5)	RatSatRep2|Unknown|Unknown	-25309	NR_106693	102465159		NR_106693	ENSRNOG00000041538	Mir1298	rno-mir-1298	microRNA 1298	ncRNA
MACS_peak_2516	chr13	33630098	33630757	+	37.22	NA	Intergenic	SATI_RN|Satellite|Satellite	621223	NM_021762	60381	Rn.156195	NM_021762	ENSRNOG00000002319	Tsn	-	translin	protein-coding
MACS_peak_6938	chr3	156825445	156826146	+	37.15	NA	Intergenic	RatSatRep2|Unknown|Unknown	-47796	NM_001047097	311604	Rn.225061	NM_001047097	ENSRNOG00000027988	Zhx3	Tix1	zinc fingers and homeoboxes 3	protein-coding
MACS_peak_800	chr1	168914423	168915475	+	37.14	NA	Intergenic	RatSatRep2|Unknown|Unknown	-9290	NM_001001026	405911	Rn.141868	NM_001001026	ENSRNOG00000034039	Olr127	-	olfactory receptor 127	protein-coding
MACS_peak_1235	chr1	238867059	238867365	+	37.09	NA	Intergenic	RNHAL1|LINE|L1	20339	NM_001106356	293960	Rn.4050	NM_001106356	ENSRNOG00000018107	Zfand5	Zfp216	zinc finger AN1-type containing 5	protein-coding
MACS_peak_8350	chr5	157337174	157337501	+	36.96	NA	Intergenic	Intergenic	9680	NM_001106696	298581	Rn.86225	NM_001106696	ENSRNOG00000017024	Pla2g2e	-	phospholipase A2, group IIE	protein-coding
MACS_peak_8385	chr5	162231856	162232772	+	36.96	NA	Intergenic	L1_Rat1|LINE|L1	48917	NM_001135782	502994	Rn.221349	NM_001135782	ENSRNOG00000027278	Pramef8	RGD1564061	PRAME family member 8	protein-coding
MACS_peak_11019	chrX	96497393	96497719	+	36.94	NA	Intergenic	L1_Rn|LINE|L1	-31280	NM_001106967	302773	Rn.218608	NM_001106967	ENSRNOG00000031294	RGD1563104	-	similar to Vigilin (High density lipoprotein-binding protein)	protein-coding
MACS_peak_2971	chr14	46606786	46607058	+	36.92	NA	intron (NM_147136, intron 1 of 5)	RMER17B_Rn|LTR|ERVK	-30008	NM_001025002	310926		NM_001025002		LOC310926	Aa1011|Aa1262|Ab2-057|Ac1147	hypothetical protein LOC310926	protein-coding
MACS_peak_3880	chr16	52901353	52901619	+	36.86	NA	Intergenic	L1_Rat1|LINE|L1	-773895	NM_001191690	290766	Rn.228221	NM_001191690	ENSRNOG00000028299	Triml2	RGD1565382	tripartite motif family-like 2	protein-coding
MACS_peak_2302	chr12	29616180	29616436	+	36.81	NA	intron (NM_001077201, intron 2 of 5)	L1_Rn|LINE|L1	127397	NM_001077201	363909	Rn.202895	NM_001077201	ENSRNOG00000000886	Caln1	-	calneuron 1	protein-coding
MACS_peak_3037	chr14	56829895	56830216	+	36.75	NA	Intergenic	L1_Rn|LINE|L1	-1748504	NM_001004087	360942	Rn.228266	NM_001004087	ENSRNOG00000012367	Pcdh7	-	protocadherin 7	protein-coding
MACS_peak_9045	chr7	6577846	6579123	+	36.75	NA	Intergenic	RatSatRep2|Unknown|Unknown	47801	NM_001001073	405963	Rn.143374	NM_001001073	ENSRNOG00000047818	Olr964	-	olfactory receptor 964	protein-coding
MACS_peak_154	chr1	26598945	26599183	+	36.7	NA	Intergenic	SATI_RN|Satellite|Satellite	-759866	NM_021666	59299	Rn.41863	NM_021666	ENSRNOG00000012609	Trdn	-	triadin	protein-coding
MACS_peak_4559	chr18	51111194	51112383	+	36.7	NA	Intergenic	RatSatRep2|Unknown|Unknown	-380408	NM_001014011	307288	Rn.53932	NM_001014011	ENSRNOG00000015225	Gramd3	Gramd2b|RGD1311016	GRAM domain containing 3	protein-coding
MACS_peak_5086	chr2	6291999	6292566	+	36.7	NA	Intergenic	RatSatRep2|Unknown|Unknown	-712388	NM_031130	81808	Rn.89710	NM_031130	ENSRNOG00000014795	Nr2f1	COUP-TFI	nuclear receptor subfamily 2, group F, member 1	protein-coding
MACS_peak_6717	chr3	92437261	92438519	+	36.68	NA	intron (NM_001107755, intron 1 of 6)	RatSatRep2|Unknown|Unknown	34241	NM_001107755	311252	Rn.230588	NM_001107755	ENSRNOG00000005348	Pamr1	RGD1308745|Ramp	peptidase domain containing associated with muscle regeneration 1	protein-coding
MACS_peak_2947	chr14	46537367	46539426	+	36.65	NA	Intergenic	Intergenic	-98534	NM_001025002	310926		NM_001025002		LOC310926	Aa1011|Aa1262|Ab2-057|Ac1147	hypothetical protein LOC310926	protein-coding
MACS_peak_1646	chr10	70456987	70457525	+	36.64	NA	Intergenic	RatSatRep2|Unknown|Unknown	-32321	NM_001270386	688925	Rn.157280	NM_001270386		LOC688925	LRRGT00083	similar to Glutathione S-transferase alpha-4	protein-coding
MACS_peak_6467	chr3	23549892	23550174	+	36.54	NA	Intergenic	RatSatRep2|Unknown|Unknown	-39074	NM_133589	171121	Rn.9573	NM_133589	ENSRNOG00000015145	Ppp6c	-	protein phosphatase 6, catalytic subunit	protein-coding
MACS_peak_7509	chr4	104396983	104397319	+	36.51	NA	Intergenic	L1_Rn|LINE|L1	-552445	NM_001170573	293862	Rn.106134	NM_001106344	ENSRNOG00000058439	Fam50a	RGD1560964	family with sequence similarity 50, member A	protein-coding
MACS_peak_63	chr1	11946016	11946428	+	36.47	NA	Intergenic	RNLTR3-int|LTR|ERVK	-23869	NR_046238	100861534		NR_046238	ENSRNOG00000059852	Rn5-8s	-	5.8S ribosomal RNA	rRNA
MACS_peak_5181	chr2	20462876	20463153	+	36.47	NA	Intergenic	(AGGGTT)n|Simple_repeat|Simple_repeat	-310130	NM_001109505	688555	Rn.21798	NM_001109505	ENSRNOG00000016342	Atg10	-	autophagy related 10	protein-coding
MACS_peak_7071	chr4	15076986	15077222	+	36.42	NA	Intergenic	RatSatRep2|Unknown|Unknown	428179	NM_017017	24446	Rn.10468	NM_017017	ENSRNOG00000007027	Hgf	HPTA	hepatocyte growth factor	protein-coding
MACS_peak_10964	chrX	75650278	75650889	+	36.42	NA	Intergenic	RatSatRep2|Unknown|Unknown	-84102	NM_001039101	317235	Rn.84994	NM_001039101	ENSRNOG00000002751	Zdhhc15	-	zinc finger, DHHC-type containing 15	protein-coding
MACS_peak_9779	chr8	43543130	43543457	+	36.42	NA	Intergenic	L1_Rn|LINE|L1	-19073	NM_001000469	300616	Rn.143482	NM_001000469	ENSRNOG00000048263	Olr1315	-	olfactory receptor 1315	protein-coding
MACS_peak_7632	chr4	142103602	142103983	+	36.4	NA	Intergenic	RNHAL1|LINE|L1	-348824	NM_031040	81672	Rn.10409	NM_031040	ENSRNOG00000005662	Grm7	-	glutamate metabotropic receptor 7	protein-coding
MACS_peak_2976	chr14	46612235	46613334	+	36.4	NA	intron (NM_147136, intron 1 of 5)	intron (NM_147136, intron 1 of 5)	-24146	NM_001025002	310926		NM_001025002		LOC310926	Aa1011|Aa1262|Ab2-057|Ac1147	hypothetical protein LOC310926	protein-coding
MACS_peak_7728	chr4	169515077	169515357	+	36.4	NA	Intergenic	RatSatRep2|Unknown|Unknown	353589	NM_012843	25314	Rn.19723	NM_012843	ENSRNOG00000008676	Emp1	CL-20|EMP-1|ENP1MR|TMP	epithelial membrane protein 1	protein-coding
MACS_peak_6636	chr3	74551124	74551414	+	36.4	NA	Intergenic	L1_Rn|LINE|L1	-6028	NM_001001051	405939	Rn.142925	NM_001001051	ENSRNOG00000057929	Olr531	-	olfactory receptor 531	protein-coding
MACS_peak_7371	chr4	77403666	77404733	+	36.36	NA	Intergenic	Intergenic	-57188	NM_001134979	312299	Rn.9027	NM_001134979	ENSRNOG00000006048	Ezh2	-	enhancer of zeste 2 polycomb repressive complex 2 subunit	protein-coding
MACS_peak_2162	chr12	1512044	1512577	+	36.29	NA	Intergenic	BC1_Rn|scRNA|scRNA	-1793	NR_033176	24720		NR_033176	ENSRNOG00000050259	Rn5s	Rn5s2	5S RNA	rRNA
MACS_peak_5412	chr2	79796108	79796372	+	36.24	NA	Intergenic	Intergenic	-335326	NM_053714	114506	Rn.211841	NM_053714	ENSRNOG00000010960	Ankh	Ank|SLC61A1	ANKH inorganic pyrophosphate transport regulator	protein-coding
MACS_peak_9317	chr7	63168140	63168669	+	36.24	NA	Intergenic	RatSatRep2|Unknown|Unknown	73449	NM_053738	114557	Rn.74256	NM_053738	ENSRNOG00000004476	Wif1	-	Wnt inhibitory factor 1	protein-coding
MACS_peak_5471	chr2	96233749	96234368	+	36.22	NA	Intergenic	RatSatRep2|Unknown|Unknown	-196710	NM_013110	25647	Rn.10793	NM_013110	ENSRNOG00000011973	Il7	-	interleukin 7	protein-coding
MACS_peak_940	chr1	181210555	181210791	+	36.2	NA	Intergenic	SATI_RN|Satellite|Satellite	-2200416	NM_001013434	365355	Rn.3271	NM_001013434	ENSRNOG00000012258	Rras2	-	RAS related 2	protein-coding
MACS_peak_6046	chr2	245405631	245406454	+	36.13	NA	Intergenic	RatSatRep2|Unknown|Unknown	884343	NM_001100993	499719	Rn.215031	NM_001100993	ENSRNOG00000023457	Stpg2	-	sperm-tail PG-rich repeat containing 2	protein-coding
MACS_peak_2969	chr14	46604007	46604232	+	36.11	NA	intron (NM_147136, intron 1 of 5)	intron (NM_147136, intron 1 of 5)	-32811	NM_001025002	310926		NM_001025002		LOC310926	Aa1011|Aa1262|Ab2-057|Ac1147	hypothetical protein LOC310926	protein-coding
MACS_peak_128	chr1	23737273	23737635	+	36.08	NA	Intergenic	L1_Rn|LINE|L1	-169263	NM_001032397	252856	Rn.1671	NM_001032397	ENSRNOG00000016700	Tcf21	Capsulin|Msf-1|Pod1	transcription factor 21	protein-coding
MACS_peak_6473	chr3	24635580	24636339	+	36.08	NA	Intergenic	RNHAL1|LINE|L1	-1125000	NM_133589	171121	Rn.9573	NM_133589	ENSRNOG00000015145	Ppp6c	-	protein phosphatase 6, catalytic subunit	protein-coding
MACS_peak_536	chr1	97533951	97534285	+	36.03	NA	Intergenic	L1_Rn|LINE|L1	-98355	NM_001108479	361560	Rn.65503	NM_001108479	ENSRNOG00000017456	Vstm2b	RGD1306235	V-set and transmembrane domain containing 2B	protein-coding
MACS_peak_5694	chr2	154496469	154497153	+	35.99	NA	intron (NM_001127562, intron 3 of 4)	RNHAL1|LINE|L1	11830	NM_001127562	499630	Rn.162590	NM_001127562	ENSRNOG00000021324	RGD1565059	-	similar to hypothetical protein E130311K13	protein-coding
MACS_peak_10119	chr9	5219025	5219404	+	35.99	NA	Intergenic	L1_Rn|LINE|L1	111608	NM_053521	85426	Rn.44872	NM_053521	ENSRNOG00000010597	Slc5a7	Cht1	solute carrier family 5 member 7	protein-coding
MACS_peak_3705	chr16	13111567	13112676	+	35.97	NA	Intergenic	RNHAL1|LINE|L1	-918003	NM_001113787	498591	Rn.122857	NM_001113787	ENSRNOG00000045563	RGD1559804	-	similar to hypothetical protein 4930474N05	protein-coding
MACS_peak_2572	chr13	46973462	46973953	+	35.97	NA	Intergenic	RatSatRep2|Unknown|Unknown	179814	NM_022269	64036	Rn.18841	NM_022269	ENSRNOG00000003927	Cd55	Daf|Daf1	CD55 molecule	protein-coding
MACS_peak_7629	chr4	139620399	139620978	+	35.9	NA	Intergenic	RatSatRep2|Unknown|Unknown	-49404	NM_001037363	500280	Rn.96330	NM_001037363	ENSRNOG00000006802	Lrrn1	-	leucine rich repeat neuronal 1	protein-coding
MACS_peak_306	chr1	55650765	55651731	+	35.9	NA	Intergenic	Intergenic	244388	NM_001099465	685666	Rn.217930	NM_001099465	ENSRNOG00000013671	Vom2r9	RGD1564755	vomeronasal 2 receptor, 9	protein-coding
MACS_peak_10799	chrX	36443695	36443926	+	35.88	NA	intron (NM_001190994, intron 19 of 32)	intron (NM_001190994, intron 19 of 32)	482102	NM_001190994	678739	Rn.225026	NM_001190994		Phka2	-	phosphorylase kinase regulatory subunit alpha 2	protein-coding
MACS_peak_2568	chr13	46398470	46398844	+	35.77	NA	intron (NM_001191669, intron 4 of 26)	RatSatRep2|Unknown|Unknown	228694	NM_001191669	289007	Rn.225282	NM_001191669	ENSRNOG00000003878	Thsd7b	RGD1306938	thrombospondin type 1 domain containing 7B	protein-coding
MACS_peak_8627	chr6	52950740	52951005	+	35.77	NA	Intergenic	RatSatRep2|Unknown|Unknown	199766	NM_001108707	362728	Rn.13221	NM_001108707	ENSRNOG00000010750	Twistnb	-	TWIST neighbor	protein-coding
MACS_peak_10021	chr8	113973446	113973720	+	35.76	NA	intron (NM_131907, intron 19 of 30)	intron (NM_131907, intron 19 of 30)	-36486	NM_001108182	315978	Rn.105331	NM_001108182	ENSRNOG00000042432	Nek11	-	NIMA-related kinase 11	protein-coding
MACS_peak_11413	chrY_KL568151v1_random	3450497	3450843	+	35.75	NA	NA	L1_Rn|LINE|L1	NA	NA
MACS_peak_4607	chr18	58787672	58787934	+	35.75	NA	Intergenic	L1_Rn|LINE|L1	298448	NM_080887	140922	Rn.40430	NM_080887	ENSRNOG00000018818	Txnl1	Txnl	thioredoxin-like 1	protein-coding
MACS_peak_8550	chr6	31064191	31065086	+	35.72	NA	Intergenic	Intergenic	-425349	NM_147136	257642		NM_147136		LOC257642	ribin	rRNA promoter binding protein	protein-coding
MACS_peak_2707	chr13	89437982	89438467	+	35.72	NA	Intergenic	CpG	-41834	NM_001109075	498278	Rn.7902	NM_001109075	ENSRNOG00000034221	Cfap126	RGD1562658	cilia and flagella associated protein 126	protein-coding
MACS_peak_195	chr1	38444039	38444833	+	35.56	NA	Intergenic	Intergenic	-205434	NR_037334	100526572		NR_037334	ENSRNOG00000035509	Mir3556b	rno-mir-3556b	microRNA 3556b	ncRNA
MACS_peak_6589	chr3	63113530	63114322	+	35.54	NA	intron (NM_080893, intron 2 of 19)	L1_Rn|LINE|L1	-19392	NM_001127481	140928	Rn.88630	NM_080893	ENSRNOG00000024457	Pde11a	-	phosphodiesterase 11A	protein-coding
MACS_peak_4258	chr17	56790743	56791265	+	35.54	NA	Intergenic	RatSatRep2|Unknown|Unknown	118671	NM_139082	83837	Rn.25267	NM_139082	ENSRNOG00000016066	Bambi	-	BMP and activin membrane-bound inhibitor	protein-coding
MACS_peak_7277	chr4	55556931	55557223	+	35.54	NA	Intergenic	RatSatRep2|Unknown|Unknown	-31002	NM_001109225	500057	Rn.219941	NM_001109225	ENSRNOG00000007662	Zfp800	RGD1560157	zinc finger protein 800	protein-coding
MACS_peak_3420	chr15	35494899	35495502	+	35.54	NA	Intergenic	RatSatRep2|Unknown|Unknown	-9645	NM_001000462	300602	Rn.143493	NM_001000462		Olr1301	-	olfactory receptor 1301	protein-coding
MACS_peak_3661	chr15	108653500	108654042	+	35.54	NA	intron (NM_001100685, intron 1 of 7)	intron (NM_001100685, intron 1 of 7)	45568	NM_001100685	306198	Rn.137340	NM_001100685	ENSRNOG00000014075	Clybl	-	citrate lyase beta like	protein-coding
MACS_peak_874	chr1	180573200	180573441	+	35.5	NA	Intergenic	SATI_RN|Satellite|Satellite	-1563063	NM_001013434	365355	Rn.3271	NM_001013434	ENSRNOG00000012258	Rras2	-	RAS related 2	protein-coding
MACS_peak_3480	chr15	53264033	53264416	+	35.36	NA	Intergenic	RatSatRep2|Unknown|Unknown	496782	NM_001017376	290356	Rn.11689	NM_001017376	ENSRNOG00000049071	Phyhip	-	phytanoyl-CoA 2-hydroxylase interacting protein	protein-coding
MACS_peak_7344	chr4	71144711	71145013	+	35.32	NA	Intergenic	L1_Rn|LINE|L1	-148467	NM_001191611	297025	Rn.163642	NM_001191611	ENSRNOG00000015682	Kel	RGD1565470	Kell blood group, metallo-endopeptidase	protein-coding
MACS_peak_1072	chr1	206743659	206744897	+	35.26	NA	Intergenic	RatSatRep2|Unknown|Unknown	-156339	NM_001143858	309081	Rn.1482	NM_001143858	ENSRNOG00000018683	Dock1	RGD1566072	dedicator of cyto-kinesis 1	protein-coding
MACS_peak_67	chr1	11951503	11951802	+	35.26	NA	Intergenic	RNLTR3-int|LTR|ERVK	-18439	NR_046238	100861534		NR_046238	ENSRNOG00000059852	Rn5-8s	-	5.8S ribosomal RNA	rRNA
MACS_peak_4534	chr18	45575696	45575999	+	35.22	NA	Intergenic	L1_Rat1|LINE|L1	-195117	NM_001106146	291585	Rn.225791	NM_001106146	ENSRNOG00000025422	Pudp	Fam16ax|Hdhd1|Hdhd1a	pseudouridine 5'-phosphatase	protein-coding
MACS_peak_10803	chrX	36466458	36467022	+	35.15	NA	intron (NM_001190994, intron 19 of 32)	intron (NM_001190994, intron 19 of 32)	459172	NM_001190994	678739	Rn.225026	NM_001190994		Phka2	-	phosphorylase kinase regulatory subunit alpha 2	protein-coding
MACS_peak_3014	chr14	47988092	47988759	+	35.15	NA	Intergenic	ISAT_RN|Satellite|Satellite	-181304	NM_001271306	686295	Rn.3259	NM_001271306	ENSRNOG00000048441	Wdr82	-	WD repeat domain 82	protein-coding
MACS_peak_1275	chr1	249349409	249350117	+	35.14	NA	intron (NM_001105731, intron 5 of 16)	RatSatRep2|Unknown|Unknown	-225191	NM_001107586	309338	Rn.1661	NM_001107586	ENSRNOG00000050289	Cstf2t	-	cleavage stimulation factor subunit 2, tau variant	protein-coding
MACS_peak_7765	chr4	179683384	179683703	+	35.1	NA	intron (NM_001191980, intron 5 of 8)	intron (NM_001191980, intron 5 of 8)	16587	NM_001191980	500362	Rn.225654	NM_001191980	ENSRNOG00000015910	Lmntd1	Ifltd1|RGD1560077	lamin tail domain containing 1	protein-coding
MACS_peak_2494	chr13	32749247	32749650	+	35.08	NA	Intergenic	RatSatRep2|Unknown|Unknown	-322432	NM_001009448	360835	Rn.34446	NM_001009448	ENSRNOG00000029841	Cdh19	-	cadherin 19	protein-coding
MACS_peak_10463	chr9	94000720	94001144	+	35.04	NA	intron (NM_001172159, intron 12 of 23)	L1_Rn|LINE|L1	200152	NM_022665	24197	Rn.48774	NM_022665	ENSRNOG00000030020	Alpi	Alp1|S51097	alkaline phosphatase, intestinal	protein-coding
MACS_peak_3007	chr14	46684085	46684415	+	35.01	NA	intron (NM_001025002, intron 6 of 6)	SSU-rRNA_Hsa|rRNA|rRNA	-2733	NR_046238	100861534		NR_046238	ENSRNOG00000059852	Rn5-8s	-	5.8S ribosomal RNA	rRNA
MACS_peak_3891	chr16	55035038	55035799	+	34.99	NA	Intergenic	RNHAL1|LINE|L1	-33096	NM_145096	246326	Rn.17310	NM_145096	ENSRNOG00000022686	Zdhhc2	DHHC2|srec	zinc finger, DHHC-type containing 2	protein-coding
MACS_peak_3120	chr14	76302989	76303703	+	34.95	NA	Intergenic	L1_Rn|LINE|L1	422926	NM_053391	84406	Rn.17364	NM_053391	ENSRNOG00000010598	Hs3st1	3OST-I	heparan sulfate-glucosamine 3-sulfotransferase 1	protein-coding
MACS_peak_5685	chr2	152853624	152854284	+	34.89	NA	intron (NM_138891, intron 3 of 3)	RNHAL1|LINE|L1	-29407	NM_001107678	310461	Rn.2744	NM_001107678	ENSRNOG00000014599	Dhx36	-	DEAH-box helicase 36	protein-coding
MACS_peak_6290	chr20	33168853	33169167	+	34.88	NA	intron (NM_012874, intron 25 of 43)	RNHAL1|LINE|L1	91904	NM_001107630	309772	Rn.17643	NM_001107630	ENSRNOG00000000405	Vgll2	-	vestigial-like family member 2	protein-coding
MACS_peak_10781	chrX	32921033	32921427	+	34.83	NA	Intergenic	L1_Rn|LINE|L1	174971	NM_012706	24938	Rn.10316	NM_012706	ENSRNOG00000004124	Grpr	-	gastrin releasing peptide receptor	protein-coding
MACS_peak_5907	chr2	208793725	208794213	+	34.79	NA	intron (NM_207586, intron 10 of 12)	L1_Rn|LINE|L1	43615	NM_207586	113901	Rn.43692	NM_207586	ENSRNOG00000033162	Chia	-	chitinase, acidic	protein-coding
MACS_peak_10813	chrX	38806710	38807083	+	34.79	NA	Intergenic	RatSatRep2|Unknown|Unknown	-339074	NM_001289778	317508	Rn.231886	NM_001289778	ENSRNOG00000005176	Map7d2	Brelin|Mtap7d2|RGD1564852	MAP7 domain containing 2	protein-coding
MACS_peak_5810	chr2	182098196	182098930	+	34.74	NA	Intergenic	RatSatRep2|Unknown|Unknown	58225	NM_021757	60376	Rn.44181	NM_021757	ENSRNOG00000006655	Plrg1	-	pleiotropic regulator 1	protein-coding
MACS_peak_7763	chr4	179675730	179675988	+	34.71	NA	intron (NM_001191980, intron 6 of 8)	intron (NM_001191980, intron 6 of 8)	24271	NM_001191980	500362	Rn.225654	NM_001191980	ENSRNOG00000015910	Lmntd1	Ifltd1|RGD1560077	lamin tail domain containing 1	protein-coding
MACS_peak_4191	chr17	44301718	44301921	+	34.58	NA	Intergenic	ISAT_RN|Satellite|Satellite	-220325	NM_022686	64627	Rn.1659	NM_022686	ENSRNOG00000054017	Hist1h4b	H1ft|Hist4|Hist4h4	histone cluster 1 H4 family member B	protein-coding
MACS_peak_2824	chr14	10473058	10473627	+	34.58	NA	intron (NM_001014134, intron 11 of 17)	intron (NM_001014134, intron 11 of 17)	26361	NM_001014134	360912	Rn.104354	NM_001014134	ENSRNOG00000002181	Helq	Hel308	helicase, POLQ-like	protein-coding
MACS_peak_6121	chr20	1674824	1675559	+	34.57	NA	Intergenic	L1_Rn|LINE|L1	20192	NM_001000510	309583	Rn.215180	NM_001000510		Olr1733	ratchr20-1291348-1290419_ORF	olfactory receptor 1733	protein-coding
MACS_peak_916	chr1	180971469	180971712	+	34.46	NA	Intergenic	SATI_RN|Satellite|Satellite	-1961333	NM_001013434	365355	Rn.3271	NM_001013434	ENSRNOG00000012258	Rras2	-	RAS related 2	protein-coding
MACS_peak_936	chr1	181189517	181189761	+	34.39	NA	Intergenic	ISAT_RN|Satellite|Satellite	-2179382	NM_001013434	365355	Rn.3271	NM_001013434	ENSRNOG00000012258	Rras2	-	RAS related 2	protein-coding
MACS_peak_11506	chrY_KL568161v1_random	5097992	5098324	+	34.36	NA	NA	RatSatRep2|Unknown|Unknown	NA	NA
MACS_peak_5641	chr2	142613986	142614341	+	34.33	NA	Intergenic	RatSatRep2|Unknown|Unknown	-72561	NM_001107676	310417	Rn.38949	NM_001107676	ENSRNOG00000010980	Proser1	RGD1309403	proline and serine rich 1	protein-coding
MACS_peak_4856	chr19	28127235	28128212	+	34.28	NA	Intergenic	Intergenic	-264896	NM_001014221	363337	Rn.198445	NM_001014221	ENSRNOG00000042971	LOC363337	-	similar to RIKEN cDNA 1700081O22	protein-coding
MACS_peak_4475	chr18	30698999	30699352	+	34.25	NA	Intergenic	RatSatRep2|Unknown|Unknown	76226	NM_001106152	291640	Rn.218546	NM_001106152	ENSRNOG00000027359	Slc25a2	-	solute carrier family 25 member 2	protein-coding
MACS_peak_4806	chr19	26429763	26430207	+	34.22	NA	Intergenic	Intergenic	233148	NM_199404	361378	Rn.102840	NM_199404	ENSRNOG00000023910	Man2b1	Manb	mannosidase, alpha, class 2B, member 1	protein-coding
MACS_peak_7216	chr4	45074359	45074681	+	34.2	NA	intron (NM_001004102, intron 1 of 14)	L1_Rn|LINE|L1	73465	NM_001004102	296911	Rn.24435	NM_001004102	ENSRNOG00000056243	ST7	-	suppression of tumorigenicity 7	protein-coding
MACS_peak_6008	chr2	236612959	236613176	+	34.2	NA	intron (NM_001106471, intron 1 of 10)	intron (NM_001106471, intron 1 of 10)	7372	NM_001106471	295443	Rn.3507	NM_001106471	ENSRNOG00000011311	Papss1	-	3'-phosphoadenosine 5'-phosphosulfate synthase 1	protein-coding
MACS_peak_4518	chr18	40246496	40246951	+	34.2	NA	intron (NM_001109124, intron 1 of 9)	L1_Rn|LINE|L1	8122	NM_001109124	498858	Rn.23933	NM_001109124	ENSRNOG00000003559	Ccdc112	RGD1561942	coiled-coil domain containing 112	protein-coding
MACS_peak_10218	chr9	24156639	24157187	+	34.2	NA	Intergenic	RatSatRep2|Unknown|Unknown	61139	NM_001012130	316265	Rn.50944	NM_001012130	ENSRNOG00000013600	Pgk2	-	phosphoglycerate kinase 2	protein-coding
MACS_peak_5410	chr2	79711459	79711728	+	34.17	NA	Intergenic	RatSatRep2|Unknown|Unknown	-271606	NM_001108545	361907	Rn.45065	NM_001108545	ENSRNOG00000024433	Fbxl7	-	F-box and leucine-rich repeat protein 7	protein-coding
MACS_peak_5978	chr2	226909208	226909528	+	34.17	NA	intron (NM_133584, intron 1 of 21)	RatSatRep2|Unknown|Unknown	8749	NM_133584	171115	Rn.10861	NM_133584	ENSRNOG00000014443	Pde5a	PDE5A2	phosphodiesterase 5A	protein-coding
MACS_peak_10738	chrX	23046060	23046448	+	34.15	NA	Intergenic	RatSatRep2|Unknown|Unknown	93440	NM_012621	24638	Rn.10115	NM_012621	ENSRNOG00000000165	Pfkfb1	PFRX|Pfkfb01	6-phosphofructo-2-kinase/fructose-2,6-biphosphatase 1	protein-coding
MACS_peak_5287	chr2	53229125	53229463	+	34.09	NA	intron (NM_017094, intron 3 of 9)	L1_Rn|LINE|L1	84590	NM_017094	25235	Rn.2178	NM_017094	ENSRNOG00000015654	Ghr	GHR/BP	growth hormone receptor	protein-coding
MACS_peak_1642	chr10	69523432	69524074	+	34.08	NA	Intergenic	L1_Rat1|LINE|L1	14083	NM_001191092	688605	Rn.157282	NM_001191092	ENSRNOG00000021851	Ccl1	-	C-C motif chemokine ligand 1	protein-coding
MACS_peak_11217	chrX	149333060	149333337	+	34.08	NA	Intergenic	L1_Rn|LINE|L1	911571	NM_001109322	501655	Rn.126531	NM_001109322	ENSRNOG00000012560	Ctag2	RGD1561702	cancer/testis antigen 2	protein-coding
MACS_peak_3669	chr15	110437072	110437418	+	34.02	NA	intron (NM_022223, intron 3 of 4)	L1_Rn|LINE|L1	175436	NM_022223	63851	Rn.44476	NM_022223	ENSRNOG00000009288	Fgf14	Fhf4	fibroblast growth factor 14	protein-coding
MACS_peak_4290	chr17	64840749	64841077	+	33.99	NA	Intergenic	RatSatRep2|Unknown|Unknown	-377691	NM_012527	24260	Rn.87735	NM_012527	ENSRNOG00000049410	Chrm3	-	cholinergic receptor, muscarinic 3	protein-coding
MACS_peak_7041	chr4	6879151	6879654	+	33.96	NA	Intergenic	Intergenic	-23796	NM_001106573	296730	Rn.23610	NM_001106573	ENSRNOG00000009226	Crygn	-	crystallin, gamma N	protein-coding
MACS_peak_60	chr1	11942619	11943497	+	33.93	NA	Intergenic	B1_Mur3|SINE|Alu	-27033	NR_046238	100861534		NR_046238	ENSRNOG00000059852	Rn5-8s	-	5.8S ribosomal RNA	rRNA
MACS_peak_10888	chrX	52705729	52705990	+	33.86	NA	Intergenic	RatSatRep2|Unknown|Unknown	-654949	NM_001005244	24907	Rn.10307	NM_012698	ENSRNOG00000046366	Dmd	DNADMD1	dystrophin	protein-coding
MACS_peak_7377	chr4	77446421	77446872	+	33.85	NA	Intergenic	RMER12B|LTR|ERVK	42889	NM_053849	116598	Rn.39305	NM_053849	ENSRNOG00000006228	Pdia4	ERp-72|Erp70|Erp72	protein disulfide isomerase family A, member 4	protein-coding
MACS_peak_7686	chr4	157086600	157086901	+	33.85	NA	Intergenic	(CAGCCC)n|Simple_repeat|Simple_repeat	-8737	NM_134376	171393	Rn.162785	NM_134376	ENSRNOG00000011156	Clstn3	Cs3|Cstn3	calsyntenin 3	protein-coding
MACS_peak_6319	chr20	41642572	41643730	+	33.81	NA	Intergenic	RatSatRep2|Unknown|Unknown	376585	NM_024368	79209	Rn.10556	NM_024368	ENSRNOG00000000543	Frk	-	fyn-related Src family tyrosine kinase	protein-coding
MACS_peak_2946	chr14	46535285	46535706	+	33.72	NA	Intergenic	RNLTR3-int|LTR|ERVK	-101435	NM_001025002	310926		NM_001025002		LOC310926	Aa1011|Aa1262|Ab2-057|Ac1147	hypothetical protein LOC310926	protein-coding
MACS_peak_9387	chr7	81479694	81480175	+	33.7	NA	intron (NM_053546, intron 1 of 8)	RatSatRep2|Unknown|Unknown	112365	NM_053546	89807	Rn.161953	NM_053546	ENSRNOG00000005854	Angpt1	Agpt|Agpt1|Ang-1	angiopoietin 1	protein-coding
MACS_peak_1216	chr1	232282019	232282910	+	33.7	NA	Intergenic	L1_Rn|LINE|L1	-751678	NM_019141	25565	Rn.53972	NM_019141	ENSRNOG00000013239	Tle4	Esp2|Grg-4	transducin-like enhancer of split 4	protein-coding
MACS_peak_1916	chr11	31012237	31012455	+	33.63	NA	Intergenic	(GGGAGACA)n|Simple_repeat|Simple_repeat	-34923	NM_001191661	304104	Rn.95642	NM_001191661	ENSRNOG00000002080	Urb1	RGD1304621	URB1 ribosome biogenesis 1 homolog (S. cerevisiae)	protein-coding
MACS_peak_910	chr1	180928426	180928674	+	33.63	NA	Intergenic	ISAT_RN|Satellite|Satellite	-1918293	NM_001013434	365355	Rn.3271	NM_001013434	ENSRNOG00000012258	Rras2	-	RAS related 2	protein-coding
MACS_peak_10354	chr9	64469150	64469912	+	33.63	NA	Intergenic	L1_Rn|LINE|L1	104294	NM_001113370	501143	Rn.145717	NM_001113370	ENSRNOG00000054379	Boll	RGD1559527	boule homolog, RNA binding protein	protein-coding
MACS_peak_8646	chr6	58622589	58623015	+	33.63	NA	Intergenic	L1_Rn|LINE|L1	154611	NM_001163156	362733	Rn.56219	NM_001108709	ENSRNOG00000006867	Etv1	-	ets variant 1	protein-coding
MACS_peak_11460	chrY_KL568157v1_random	4950035	4950470	+	33.63	NA	NA	RNHAL1|LINE|L1	NA	NA
MACS_peak_7265	chr4	54827739	54828332	+	33.61	NA	intron (NM_022202, intron 6 of 9)	RatSatRep2|Unknown|Unknown	354430	NR_032747	100314270		NR_032747	ENSRNOG00000036461	Mir592	rno-mir-592	microRNA 592	ncRNA
MACS_peak_10589	chrUn_KL568337v1	25151	25381	+	33.61	NA	NA	CpG	NA	NA
MACS_peak_7958	chr5	50159035	50159399	+	33.57	NA	intron (NM_001079701, intron 11 of 12)	RatSatRep2|Unknown|Unknown	-20742	NM_001107924	313139	Rn.24337	NM_001107924	ENSRNOG00000008908	Slc35a1	-	solute carrier family 35 member A1	protein-coding
MACS_peak_10183	chr9	12821015	12821385	+	33.5	NA	intron (NM_001135011, intron 2 of 9)	intron (NM_001135011, intron 2 of 9)	80315	NM_001135011	501095	Rn.204423	NM_001135011	ENSRNOG00000011321	Rftn1	2310015n21rik|RGD1310777|RGD1563347	raftlin lipid raft linker 1	protein-coding
MACS_peak_7375	chr4	77409433	77411397	+	33.38	NA	Intergenic	RLTR18|LTR|ERVK	-63404	NM_001134979	312299	Rn.9027	NM_001134979	ENSRNOG00000006048	Ezh2	-	enhancer of zeste 2 polycomb repressive complex 2 subunit	protein-coding
MACS_peak_4961	chr19	45479108	45479366	+	33.38	NA	Intergenic	L1_Rn|LINE|L1	-459678	NM_001107433	307868	Rn.225132	NM_001107433	ENSRNOG00000011552	Mon1b	RGD1309977	MON1 homolog B, secretory trafficking associated	protein-coding
MACS_peak_7376	chr4	77413770	77415599	+	33.36	NA	Intergenic	Intergenic	-67673	NM_001134979	312299	Rn.9027	NM_001134979	ENSRNOG00000006048	Ezh2	-	enhancer of zeste 2 polycomb repressive complex 2 subunit	protein-coding
MACS_peak_3561	chr15	75415906	75417848	+	33.33	NA	Intergenic	RatSatRep2|Unknown|Unknown	2319898	NM_001191688	306091	Rn.232343	NM_001191688		Pcdh9	-	protocadherin 9	protein-coding
MACS_peak_2758	chr13	105480300	105481019	+	33.32	NA	Intergenic	L1_Rn|LINE|L1	72480	NM_001108858	364073	Rn.218622	NM_001108858	ENSRNOG00000002501	Ddx3y	RGD1309586	DEAD-box helicase 3, Y-linked	protein-coding
MACS_peak_9715	chr8	25612998	25613240	+	33.21	NA	intron (NM_001191791, intron 10 of 22)	(ACCCTC)n|Simple_repeat|Simple_repeat	56275	NM_001191791	315496	Rn.22725	NM_001191791	ENSRNOG00000026589	Dpy19l1	RGD1305822	dpy-19 like C-mannosyltransferase 1	protein-coding
MACS_peak_4342	chr17	87224405	87224661	+	33.21	NA	Intergenic	(TAACCC)n|Simple_repeat|Simple_repeat	625196	NM_001191693	307178	Rn.162259	NM_001191693	ENSRNOG00000008659	Arhgap21	-	Rho GTPase activating protein 21	protein-coding
MACS_peak_11298	chrY_KL568139v1_random	961123	962252	+	33.17	NA	Intergenic	RatSatRep2|Unknown|Unknown	-7196559	NM_001166307	498592		NM_001166307		LOC498592	-	similar to CG32662-PA	protein-coding
MACS_peak_10996	chrX	88650580	88652174	+	33.17	NA	Intergenic	RatSatRep2|Unknown|Unknown	49242	NM_001106969	302783	Rn.218603	NM_001106969	ENSRNOG00000029736	H2afb3	RGD1561666	H2A histone family, member B3	protein-coding
MACS_peak_2498	chr13	33475882	33476133	+	33.07	NA	Intergenic	SATI_RN|Satellite|Satellite	775643	NM_021762	60381	Rn.156195	NM_021762	ENSRNOG00000002319	Tsn	-	translin	protein-coding
MACS_peak_8328	chr5	152436256	152436493	+	33.07	NA	Intergenic	Intergenic	21631	NM_001039011	298545	Rn.79548	NM_001039011	ENSRNOG00000022838	Cnksr1	-	connector enhancer of kinase suppressor of Ras 1	protein-coding
MACS_peak_7787	chr5	1682868	1683456	+	33.06	NA	Intergenic	RNHAL1|LINE|L1	265684	NM_001106630	297748	Rn.152547	NM_001106630	ENSRNOG00000006110	Jph1	-	junctophilin 1	protein-coding
MACS_peak_11279	chrY	1588659	1589079	+	33.03	NA	Intergenic	L1_Rat1|LINE|L1	-185447	NM_001329902	103694559		NM_001329902	ENSRNOG00000058664	Usp9y	-	ubiquitin specific peptidase 9, Y-linked	protein-coding
MACS_peak_2500	chr13	33485627	33485833	+	32.97	NA	Intergenic	SATI_RN|Satellite|Satellite	765920	NM_021762	60381	Rn.156195	NM_021762	ENSRNOG00000002319	Tsn	-	translin	protein-coding
MACS_peak_7379	chr4	77449302	77451347	+	32.97	NA	Intergenic	RLTR18B|LTR|ERVK	39211	NM_053849	116598	Rn.39305	NM_053849	ENSRNOG00000006228	Pdia4	ERp-72|Erp70|Erp72	protein disulfide isomerase family A, member 4	protein-coding
MACS_peak_10422	chr9	83389179	83390369	+	32.96	NA	Intergenic	L1_Rn|LINE|L1	-136316	NM_001162411	316539	Rn.6202	NM_001162411	ENSRNOG00000013213	Epha4	RGD1560587	Eph receptor A4	protein-coding
MACS_peak_7100	chr4	25455372	25455731	+	32.88	NA	Intergenic	RatSatRep2|Unknown|Unknown	19666	NM_001106629	297738	Rn.51773	NM_001106629	ENSRNOG00000000017	Steap1	Steap	STEAP family member 1	protein-coding
MACS_peak_7276	chr4	55555797	55556146	+	32.88	NA	Intergenic	RatSatRep2|Unknown|Unknown	-29896	NM_001109225	500057	Rn.219941	NM_001109225	ENSRNOG00000007662	Zfp800	RGD1560157	zinc finger protein 800	protein-coding
MACS_peak_6643	chr3	75826865	75827139	+	32.82	NA	Intergenic	RatSatRep2|Unknown|Unknown	-7768	NM_001000662	404862	Rn.142892	NM_001000662	ENSRNOG00000046448	Olr582	-	olfactory receptor 582	protein-coding
MACS_peak_5157	chr2	15774871	15775366	+	32.79	NA	Intergenic	RatSatRep2|Unknown|Unknown	-1073215	NM_001134705	100188937	Rn.105968	NM_001134705	ENSRNOG00000030237	Cox7c	Cox7c1	cytochrome c oxidase subunit 7C	protein-coding
MACS_peak_7420	chr4	86614145	86614602	+	32.79	NA	intron (NM_031078, intron 3 of 18)	RatSatRep2|Unknown|Unknown	219077	NM_031078	81742	Rn.10289	NM_031078	ENSRNOG00000012337	Pde1c	-	phosphodiesterase 1C	protein-coding
MACS_peak_9644	chr8	5034747	5035240	+	32.79	NA	Intergenic	RatSatRep2|Unknown|Unknown	401976	NM_023024	65209	Rn.44896	NM_023024	ENSRNOG00000032070	Dync2h1	Dhc1b|Dnch2|Dnchc2	dynein cytoplasmic 2 heavy chain 1	protein-coding
MACS_peak_4730	chr19	6117482	6117768	+	32.79	NA	intron (NM_053393, intron 3 of 12)	L1_Rn|LINE|L1	85690	NM_053393	84408	Rn.214220	NM_053393	ENSRNOG00000056643	Cdh8	-	cadherin 8	protein-coding
MACS_peak_9927	chr8	88341454	88342214	+	32.79	NA	Intergenic	RatSatRep2|Unknown|Unknown	-461946	NM_023958	66014	Rn.64488	NM_023958	ENSRNOG00000012479	Impg1	Mlgapc	interphotoreceptor matrix proteoglycan 1	protein-coding
MACS_peak_2108	chr11	85099773	85100415	+	32.76	NA	Intergenic	L1_Rn|LINE|L1	-58397	NM_001000908	405218	Rn.142231	NM_001000908	ENSRNOG00000048434	Olr1565	-	olfactory receptor 1565	protein-coding
MACS_peak_7457	chr4	93677799	93678129	+	32.76	NA	Intergenic	RatSatRep2|Unknown|Unknown	-390778	NM_024379	79220	Rn.10046	NM_024379	ENSRNOG00000006174	Grid2	GluD2	glutamate ionotropic receptor delta type subunit 2	protein-coding
MACS_peak_10807	chrX	36471321	36471983	+	32.71	NA	intron (NM_001190994, intron 19 of 32)	intron (NM_001190994, intron 19 of 32)	454260	NM_001190994	678739	Rn.225026	NM_001190994		Phka2	-	phosphorylase kinase regulatory subunit alpha 2	protein-coding
MACS_peak_5311	chr2	60199554	60200046	+	32.7	NA	intron (NM_012630, intron 1 of 10)	RatSatRep2|Unknown|Unknown	19585	NM_012630	24684	Rn.9757	NM_012630	ENSRNOG00000057557	Prlr	RATPRLR	prolactin receptor	protein-coding
MACS_peak_3175	chr14	91544929	91545221	+	32.65	NA	intron (NM_001025139, intron 2 of 7)	RatSatRep2|Unknown|Unknown	11030	NM_001025139	498415	Rn.144060	NM_001025139	ENSRNOG00000027801	Zpbp	-	zona pellucida binding protein	protein-coding
MACS_peak_1183	chr1	227100086	227100394	+	32.65	NA	Intergenic	L1_Rn|LINE|L1	12242	NR_102351	100910973	Rn.107400	NR_102351		LOC100910973	-	uncharacterized LOC100910973	ncRNA
MACS_peak_29	chr1	6295535	6296302	+	32.65	NA	Intergenic	L1_Rn|LINE|L1	674122	NM_013070	25600	Rn.9901	NM_013070	ENSRNOG00000011058	Utrn	-	utrophin	protein-coding
MACS_peak_9129	chr7	18298288	18298772	+	32.65	NA	Intergenic	L1_Rn|LINE|L1	-12094	NM_001108077	314659	Rn.98963	NM_001108077	ENSRNOG00000049571	Actl9	Actl9a|RGD1306886	actin-like 9	protein-coding
MACS_peak_8547	chr6	31059025	31059287	+	32.64	NA	Intergenic	A-rich|Low_complexity|Low_complexity	-419867	NM_147136	257642		NM_147136		LOC257642	ribin	rRNA promoter binding protein	protein-coding
MACS_peak_2972	chr14	46607775	46608109	+	32.6	NA	intron (NM_147136, intron 1 of 5)	RNLTR3-int|LTR|ERVK	-28988	NM_001025002	310926		NM_001025002		LOC310926	Aa1011|Aa1262|Ab2-057|Ac1147	hypothetical protein LOC310926	protein-coding
MACS_peak_10169	chr9	12387689	12388424	+	32.57	NA	Intergenic	Intergenic	-245934	NM_001109414	680486	Rn.136288	NM_001109414	ENSRNOG00000023474	Dazl	-	deleted in azoospermia-like	protein-coding
MACS_peak_8696	chr6	71451373	71452137	+	32.47	NA	Intergenic	RatSatRep2|Unknown|Unknown	-102506	NM_001276715	85421	Rn.144619	NM_001276715	ENSRNOG00000004165	Prkd1	Pkcm|Prkcm|nPKC-D1|nPKC-mu	protein kinase D1	protein-coding
MACS_peak_3293	chr15	6090492	6090773	+	32.47	NA	Intergenic	RatSatRep2|Unknown|Unknown	-195824	NM_134459	171485	Rn.20204	NM_134459	ENSRNOG00000023841	Cd99l2	Mic2l1|vms-tm2	CD99 molecule-like 2	protein-coding
MACS_peak_1905	chr11	27678973	27679237	+	32.47	NA	Intergenic	RatSatRep2|Unknown|Unknown	313910	NM_001107113	304127	Rn.29793	NM_001107113	ENSRNOG00000001582	Bach1	-	BTB domain and CNC homolog 1	protein-coding
MACS_peak_10170	chr9	12391633	12391840	+	32.46	NA	Intergenic	CpG	-242254	NM_001109414	680486	Rn.136288	NM_001109414	ENSRNOG00000023474	Dazl	-	deleted in azoospermia-like	protein-coding
MACS_peak_3336	chr15	17268688	17269215	+	32.45	NA	Intergenic	L1_Rn|LINE|L1	-395887	NM_001014137	361016	Rn.203376	NM_001014137	ENSRNOG00000007206	LOC361016	-	similar to RIKEN cDNA 4933406L09	protein-coding
MACS_peak_6496	chr3	29770888	29771491	+	32.45	NA	intron (NM_001024274, intron 1 of 9)	RatSatRep2|Unknown|Unknown	31137	NM_001024274	362129	Rn.104170	NM_001024274	ENSRNOG00000031038	Gtdc1	-	glycosyltransferase-like domain containing 1	protein-coding
MACS_peak_3993	chr16	81836862	81837086	+	32.44	NA	Intergenic	Intergenic	-2051	NM_152846	260320	Rn.86416	NM_152846	ENSRNOG00000032737	F7	-	coagulation factor VII	protein-coding
MACS_peak_5187	chr2	21727054	21727366	+	32.44	NA	Intergenic	L1_Rn|LINE|L1	-28273	NM_053721	114513	Rn.210995	NM_053721		Rasgrf2	-	RAS protein-specific guanine nucleotide-releasing factor 2	protein-coding
MACS_peak_740	chr1	154322407	154322786	+	32.44	NA	Intergenic	L1_Rn|LINE|L1	-54909	NM_053554	89816	Rn.24871	NM_053554	ENSRNOG00000018322	Picalm	Calm	phosphatidylinositol binding clathrin assembly protein	protein-coding
MACS_peak_6761	chr3	100931904	100932452	+	32.38	NA	Intergenic	L1_Rn|LINE|L1	-78745	NM_021851	60442	Rn.9461	NM_021851	ENSRNOG00000045698	Lin7c	Veli3	lin-7 homolog C, crumbs cell polarity complex component	protein-coding
MACS_peak_718	chr1	148643403	148644583	+	32.34	NA	Intergenic	Intergenic	193780	NM_001037659	652956	Rn.189455	NM_001037659		Mpp1	p55	membrane palmitoylated protein 1	protein-coding
MACS_peak_1090	chr1	213135402	213135871	+	32.31	NA	Intergenic	L1_Rn|LINE|L1	4006	NM_001001039	405925	Rn.141734	NM_001001039	ENSRNOG00000049502	Olr304	-	olfactory receptor 304	protein-coding
MACS_peak_9246	chr7	42373627	42373918	+	32.19	NA	Intergenic	RatSatRep2|Unknown|Unknown	103988	NM_021844	60427	Rn.44216	NM_021843	ENSRNOG00000005386	Kitlg	Kitl|Mgf|SCF	KIT ligand	protein-coding
MACS_peak_9244	chr7	41845172	41845602	+	32.15	NA	Intergenic	RatSatRep2|Unknown|Unknown	370224	NM_053883	116663	Rn.4313	NM_053883	ENSRNOG00000023896	Dusp6	Mkp3	dual specificity phosphatase 6	protein-coding
MACS_peak_9996	chr8	105859518	105860132	+	32.15	NA	intron (NM_134377, intron 1 of 17)	RatSatRep2|Unknown|Unknown	176870	NM_134377	171394	Rn.212755	NM_134377	ENSRNOG00000043085	Clstn2	Cs2|Cstn2	calsyntenin 2	protein-coding
MACS_peak_2805	chr14	4972264	4972495	+	32.04	NA	Intergenic	Intergenic	128798	NM_001008338	305131	Rn.7626	NM_001008338	ENSRNOG00000002121	Lrrc8d	Lrrc5	leucine rich repeat containing 8 VRAC subunit D	protein-coding
MACS_peak_9746	chr8	35536659	35537115	+	32.03	NA	Intergenic	L1_Rn|LINE|L1	-155638	NM_001048215	315546	Rn.7602	NM_001048215	ENSRNOG00000009772	Kirrel3	-	kirre like nephrin family adhesion molecule 3	protein-coding
MACS_peak_1320	chr1	259226971	259228386	+	32.02	NA	Intergenic	RatSatRep2|Unknown|Unknown	59988	NM_138512	171518	Rn.88025	NM_138512	ENSRNOG00000021924	Cyp2c22	Cyp2c70	cytochrome P450, family 2, subfamily c, polypeptide 22	protein-coding
MACS_peak_9632	chr8	240742	241138	+	32.02	NA	Intergenic	L1_Rn|LINE|L1	-167061	NM_023956	66012	Rn.209304	NM_023956	ENSRNOG00000029876	Gucy1a2	-	guanylate cyclase 1 soluble subunit alpha 2	protein-coding
MACS_peak_1407	chr10	1547644	1548229	+	32.02	NA	Intergenic	RNHAL1|LINE|L1	-26973	NM_017176	29359	Rn.6828	NM_017176	ENSRNOG00000003164	Pla2g10	PLA2GX|sPLA2-X	phospholipase A2, group X	protein-coding
MACS_peak_4877	chr19	28875681	28876099	+	32.01	NA	Intergenic	Intergenic	-1013063	NM_001014221	363337	Rn.198445	NM_001014221	ENSRNOG00000042971	LOC363337	-	similar to RIKEN cDNA 1700081O22	protein-coding
MACS_peak_3075	chr14	66733088	66733739	+	32.01	NA	intron (NM_181365, intron 5 of 8)	RatSatRep2|Unknown|Unknown	-189670	NR_037348	100526634		NR_037348	ENSRNOG00000035486	Mir3565	Mir218b|rno-mir-218b|rno-mir-3565	microRNA 3565	ncRNA
MACS_peak_3793	chr16	30838055	30838337	+	32.01	NA	Intergenic	L1_Rn|LINE|L1	1134311	NM_182672	359725	Rn.3599	NM_182672	ENSRNOG00000024411	Cbr4	-	carbonyl reductase 4	protein-coding
MACS_peak_11154	chrX	128681968	128682202	+	31.97	NA	Intergenic	L1_Rat1|LINE|L1	188471	NM_001173507	313304	Rn.29288	NM_001173507	ENSRNOG00000029885	Stag2	RGD1562042	stromal antigen 2	protein-coding
MACS_peak_8902	chr6	125730558	125730918	+	31.97	NA	Intergenic	Intergenic	-6781	NM_019153	29158	Rn.1699	NM_019153	ENSRNOG00000050539	Fbln5	-	fibulin 5	protein-coding
MACS_peak_3330	chr15	14966051	14966384	+	31.94	NA	Intergenic	L1_Rat1|LINE|L1	-228513	NM_023974	66030	Rn.211986	NM_023974		Synpr	-	synaptoporin	protein-coding
MACS_peak_5676	chr2	150715574	150716177	+	31.93	NA	Intergenic	RatSatRep2|Unknown|Unknown	-40383	NM_001191566	282635	Rn.164556	NM_001191566	ENSRNOG00000014076	Mbnl1	Mbnl	muscleblind-like splicing regulator 1	protein-coding
MACS_peak_8535	chr6	30650504	30650814	+	31.89	NA	Intergenic	RNLTR3-int|LTR|ERVK	-11370	NM_147136	257642		NM_147136		LOC257642	ribin	rRNA promoter binding protein	protein-coding
MACS_peak_5947	chr2	218307575	218308252	+	31.88	NA	Intergenic	RatSatRep2|Unknown|Unknown	344537	NM_145777	252920	Rn.27711	NM_145777	ENSRNOG00000017969	Olfm3	-	olfactomedin 3	protein-coding
MACS_peak_8816	chr6	101819900	101820461	+	31.87	NA	intron (NM_022865, intron 15 of 20)	L1_Rn|LINE|L1	-45737	NM_001017469	366671	Rn.123282	NM_001017469	ENSRNOG00000028351	Fam71d	-	family with sequence similarity 71, member D	protein-coding
MACS_peak_3818	chr16	35660848	35661184	+	31.85	NA	intron (NM_001135756, intron 6 of 11)	RatSatRep2|Unknown|Unknown	-274043	NM_022926	29750	Rn.207200	NM_022926	ENSRNOG00000012037	Galnt7	-	polypeptide N-acetylgalactosaminyltransferase 7	protein-coding
MACS_peak_3068	chr14	63644420	63644743	+	31.84	NA	Intergenic	(AGA)n|Simple_repeat|Simple_repeat	548754	NM_031347	83516	Rn.19172	NM_031347	ENSRNOG00000004473	Ppargc1a	Ppargc1	PPARG coactivator 1 alpha	protein-coding
MACS_peak_6498	chr3	30612336	30612595	+	31.84	NA	Intergenic	RNHAL1|LINE|L1	617712	NR_132636	103691779	Rn.167850	NR_132636		Zeb2os	-	zinc finger E-box binding homeobox 2, opposite strand	ncRNA
MACS_peak_8775	chr6	88203413	88204278	+	31.83	NA	Intergenic	RNHAL1|LINE|L1	1088182	NM_199269	314180	Rn.205097	NM_199269	ENSRNOG00000000618	Mdga2	Mamdc1	MAM domain containing glycosylphosphatidylinositol anchor 2	protein-coding
MACS_peak_7468	chr4	95853358	95853567	+	31.83	NA	Intergenic	RNHAL1|LINE|L1	-31281	NM_001107864	312398	Rn.7758	NM_001107864	ENSRNOG00000006391	Smarcad1	-	SWI/SNF-related, matrix-associated actin-dependent regulator of chromatin, subfamily a, containing DEAD/H box 1	protein-coding
MACS_peak_1842	chr11	8778011	8778485	+	31.83	NA	Intergenic	RNHAL1|LINE|L1	-431320	NM_022188	58946	Rn.44468	NM_022188	ENSRNOG00000029614	Robo1	-	roundabout guidance receptor 1	protein-coding
MACS_peak_1189	chr1	228024555	228024894	+	31.79	NA	Intergenic	RNHAL1|LINE|L1	-59412	NM_012845	25316	Rn.10922	NM_012845	ENSRNOG00000020993	Ms4a2	FCIGA|Fcer1b|Ms4a1	membrane spanning 4-domains A2	protein-coding
MACS_peak_920	chr1	181008661	181008970	+	31.76	NA	Intergenic	SATI_RN|Satellite|Satellite	-1998558	NM_001013434	365355	Rn.3271	NM_001013434	ENSRNOG00000012258	Rras2	-	RAS related 2	protein-coding
MACS_peak_9269	chr7	47046979	47047268	+	31.73	NA	Intergenic	RatSatRep2|Unknown|Unknown	539014	NM_001171177	299762	Rn.214064	NM_001171177	ENSRNOG00000004585	Tmtc2	RGD1309848	transmembrane and tetratricopeptide repeat containing 2	protein-coding
MACS_peak_1599	chr10	57761846	57762155	+	31.68	NA	Intergenic	L1_Rn|LINE|L1	-22891	NM_001145755	360557	Rn.12490	NM_001145755	ENSRNOG00000023143	Nlrp1a	Nalp1|Nlrp1	NLR family, pyrin domain containing 1A	protein-coding
MACS_peak_5172	chr2	18176056	18176427	+	31.66	NA	Intergenic	RNHAL1|LINE|L1	-178301	NM_019189	29331	Rn.50531	NM_019189	ENSRNOG00000032002	Hapln1	Crtl1	hyaluronan and proteoglycan link protein 1	protein-coding
MACS_peak_8174	chr5	110961374	110961615	+	31.62	NA	Intergenic	RatSatRep2|Unknown|Unknown	-634554	NM_001109357	502968	Rn.218625	NM_001109357	ENSRNOG00000033600	Zfp352	RGD1563227	zinc finger protein 352	protein-coding
MACS_peak_8534	chr6	30646951	30647790	+	31.56	NA	Intergenic	Intergenic	-8081	NM_147136	257642		NM_147136		LOC257642	ribin	rRNA promoter binding protein	protein-coding
MACS_peak_9418	chr7	89823406	89824023	+	31.46	NA	Intergenic	RatSatRep2|Unknown|Unknown	494507	NM_001134837	299897	Rn.229882	NM_001134837	ENSRNOG00000024998	Trps1	-	transcriptional repressor GATA binding 1	protein-coding
MACS_peak_3385	chr15	27669353	27669582	+	31.39	NA	Intergenic	L1_Rn|LINE|L1	-16150	NM_001000970	405325	Rn.142438	NM_001000970	ENSRNOG00000031108	Olr1635	-	olfactory receptor 1635	protein-coding
MACS_peak_11009	chrX	93128066	93129683	+	31.39	NA	intron (NM_001271228, intron 14 of 15)	RatSatRep2|Unknown|Unknown	532513	NM_001271228	317204	Rn.234112	NM_001271228		Pcdh11x	RGD1562864	protocadherin 11 X-linked	protein-coding
MACS_peak_7743	chr4	173973141	173973824	+	31.36	NA	intron (NM_053923, intron 21 of 33)	RatSatRep2|Unknown|Unknown	207247	NM_001012234	497197	Rn.123184	NM_001012234	ENSRNOG00000008514	Plcz1	-	phospholipase C, zeta 1	protein-coding
MACS_peak_10145	chr9	8493459	8493768	+	31.36	NA	Intergenic	CpG	437561	NM_001007558	450235	Rn.162355	NM_001007558	ENSRNOG00000050325	Adgre4	Adgre4p|Emr4|Emr4p	adhesion G protein-coupled receptor E4	protein-coding
MACS_peak_7038	chr4	6337379	6337692	+	31.33	NA	intron (NM_001025148, intron 7 of 8)	(GAGCAGAGGT)n|Simple_repeat|Simple_repeat	-6770	NM_001271319	311952	Rn.211885	NM_199393	ENSRNOG00000008117	Galnt11	-	polypeptide N-acetylgalactosaminyltransferase 11	protein-coding
MACS_peak_5227	chr2	35665986	35666652	+	31.31	NA	Intergenic	RNHAL1|LINE|L1	-47234	NM_001012347	294715	Rn.198108	NM_001012347		Rgs7bp	R7bp|RGD1309360	regulator of G-protein signaling 7 binding protein	protein-coding
MACS_peak_1958	chr11	43109956	43110279	+	31.29	NA	Intergenic	RatSatRep2|Unknown|Unknown	-10705	NM_138897	192258	Rn.10670	NM_138897	ENSRNOG00000001679	Gabrr3	-	gamma-aminobutyric acid type A receptor rho3 subunit	protein-coding
MACS_peak_11410	chrY_KL568151v1_random	2475762	2476604	+	31.29	NA	NA	(TCC)n|Simple_repeat|Simple_repeat	NA	NA
MACS_peak_787	chr1	166353961	166354258	+	31.29	NA	intron (NM_001107539, intron 11 of 18)	L1_Rat1|LINE|L1	50970	NM_001001021	405904	Rn.141923	NM_001001021	ENSRNOG00000015424	Olr51	-	olfactory receptor 51	protein-coding
MACS_peak_5882	chr2	201897189	201898114	+	31.27	NA	Intergenic	RatSatRep2|Unknown|Unknown	453223	NM_017265	29632	Rn.109394	NM_017265		Hsd3b2	Hsd3b1|Hsd3b2l1|Hsd3b6	hydroxy-delta-5-steroid dehydrogenase, 3 beta- and steroid delta-isomerase 2	protein-coding
MACS_peak_941	chr1	181215199	181215814	+	31.27	NA	Intergenic	SATI_RN|Satellite|Satellite	-2205249	NM_001013434	365355	Rn.3271	NM_001013434	ENSRNOG00000012258	Rras2	-	RAS related 2	protein-coding
MACS_peak_823	chr1	170075599	170075924	+	31.27	NA	Intergenic	L1_Rn|LINE|L1	-2288	NM_001000187	293338	Rn.141815	NM_001000187	ENSRNOG00000060953	Olr196	ratchr1-163062782-163061832_ORF	olfactory receptor 196	protein-coding
MACS_peak_6044	chr2	244931278	244931651	+	31.23	NA	intron (NM_001100993, intron 12 of 13)	RatSatRep2|Unknown|Unknown	409765	NM_001100993	499719	Rn.215031	NM_001100993	ENSRNOG00000023457	Stpg2	-	sperm-tail PG-rich repeat containing 2	protein-coding
MACS_peak_4164	chr17	38277351	38277651	+	31.23	NA	Intergenic	RNHAL1|LINE|L1	-46132	NM_138527	171556	Rn.18140	NM_138527	ENSRNOG00000016307	Prl5a1	Ghd1|Prlpl	prolactin family 5, subfamily a, member 1	protein-coding
MACS_peak_4600	chr18	56815962	56816272	+	31.17	NA	Intergenic	L1_Rat1|LINE|L1	54722	NM_001100974	307398	Rn.211792	NM_001100974	ENSRNOG00000025502	Arhgef37	RGD1560471	Rho guanine nucleotide exchange factor 37	protein-coding
MACS_peak_4685	chr18	86178061	86178392	+	31.12	NA	intron (NM_001170436, intron 31 of 48)	RatSatRep2|Unknown|Unknown	106342	NM_001170436	291377	Rn.139347	NM_001170436		Rttn	-	rotatin	protein-coding
MACS_peak_813	chr1	169377388	169377668	+	31.11	NA	Intergenic	RatSatRep2|Unknown|Unknown	-4991	NM_001000166	293289	Rn.141851	NM_001000166	ENSRNOG00000017138	Olr149	ratchr1-162109360-162108410_ORF	olfactory receptor 149	protein-coding
MACS_peak_5263	chr2	49807814	49808791	+	31.05	NA	Intergenic	L1_Rn|LINE|L1	125539	NM_053719	114511	Rn.16221	NM_053719	ENSRNOG00000060329	Emb	-	embigin	protein-coding
MACS_peak_6221	chr20	11883588	11883835	+	31.01	NA	intron (NM_001008307, intron 3 of 5)	intron (NM_001008307, intron 3 of 5)	20566	NM_001008307	294333	Rn.22122	NM_001008307	ENSRNOG00000001225	Fam207a	RGD1311257	family with sequence similarity 207, member A	protein-coding
MACS_peak_4030	chr16	90471325	90472284	+	30.97	NA	Intergenic	RatSatRep2|Unknown|Unknown	146607	NM_017222	29500	Rn.85891	NM_017222	ENSRNOG00000037753	Slc10a2	ASBT|IBAT|ISBAT|ISBT	solute carrier family 10 member 2	protein-coding
MACS_peak_9127	chr7	18048341	18048732	+	30.96	NA	Intergenic	L1_Rn|LINE|L1	-262088	NM_001108077	314659	Rn.98963	NM_001108077	ENSRNOG00000049571	Actl9	Actl9a|RGD1306886	actin-like 9	protein-coding
MACS_peak_1536	chr10	42043641	42044293	+	30.91	NA	Intergenic	RatSatRep2|Unknown|Unknown	-397756	NM_031608	50592	Rn.29971	NM_031608	ENSRNOG00000045816	Gria1	GluA1|gluR-A	glutamate ionotropic receptor AMPA type subunit 1	protein-coding
MACS_peak_11407	chrY_KL568151v1_random	2470128	2470516	+	30.9	NA	NA	(CCT)n|Simple_repeat|Simple_repeat	NA	NA
MACS_peak_5133	chr2	11419148	11419691	+	30.88	NA	Intergenic	RatSatRep2|Unknown|Unknown	-465252	NR_031813	100313995		NR_031813		Mir9-2	Mir9a-2|rno-mir-9-2|rno-mir-9a-2	microRNA 9-2	ncRNA
MACS_peak_2442	chr13	18819630	18819896	+	30.88	NA	Intergenic	RatSatRep2|Unknown|Unknown	-2858749	NM_001047873	301650	Rn.202933	NM_001047873	ENSRNOG00000032206	Cntnap5b	Caspr5-2|Caspr5-3|Cntnap5c|RGD1565194	contactin associated protein-like 5B	protein-coding
MACS_peak_10711	chrX	16512769	16513061	+	30.88	NA	Intergenic	RNHAL1|LINE|L1	-206837	NM_024402	79254	Rn.10777	NM_024402	ENSRNOG00000002921	Akap4	-	A-kinase anchoring protein 4	protein-coding
MACS_peak_10577	chrM	15484	16198	+	30.81	NA	NA	Intergenic	NA	NA
MACS_peak_6254	chr20	21707298	21707646	+	30.81	NA	intron (NM_001107624, intron 1 of 14)	L1_Rn|LINE|L1	-17817	NM_001107623	309724	Rn.50686	NM_001107623	ENSRNOG00000027859	Tmem26	-	transmembrane protein 26	protein-coding
MACS_peak_9400	chr7	85584994	85585263	+	30.8	NA	Intergenic	RatSatRep2|Unknown|Unknown	-1561923	NM_021697	60326	Rn.42920	NM_021697	ENSRNOG00000004117	Kcnv1	Kv8.1	potassium voltage-gated channel modifier subfamily V member 1	protein-coding
MACS_peak_10909	chrX	57167627	57168756	+	30.77	NA	Intergenic	RatSatRep2|Unknown|Unknown	-402298	NM_177935	317553	Rn.214479	NM_177935	ENSRNOG00000029663	Il1rapl1	Il1rapl	interleukin 1 receptor accessory protein-like 1	protein-coding
MACS_peak_4808	chr19	26461750	26462304	+	30.76	NA	Intergenic	Intergenic	265190	NM_199404	361378	Rn.102840	NM_199404	ENSRNOG00000023910	Man2b1	Manb	mannosidase, alpha, class 2B, member 1	protein-coding
MACS_peak_8244	chr5	131366051	131366464	+	30.7	NA	intron (NM_001350232, intron 6 of 12)	L1_Rn|LINE|L1	109130	NM_001108672	362564	Rn.87596	NM_001108672	ENSRNOG00000008025	Bend5	-	BEN domain containing 5	protein-coding
MACS_peak_2681	chr13	79546113	79546558	+	30.7	NA	Intergenic	L1_Rat1|LINE|L1	159370	NM_012908	25385	Rn.9725	NM_012908	ENSRNOG00000002978	Faslg	Apt1Lg1|CD95-L|Fasl|Tnfsf6|Tnlg1a	Fas ligand	protein-coding
MACS_peak_7194	chr4	42908952	42909396	+	30.69	NA	Intergenic	RatSatRep2|Unknown|Unknown	187225	NM_001114401	282587	Rn.16244	NM_001114401	ENSRNOG00000061845	Cttnbp2	Cbp90|Cortbp2	cortactin binding protein 2	protein-coding
MACS_peak_10215	chr9	23123476	23123727	+	30.62	NA	Intergenic	RNHAL1|LINE|L1	-228670	NM_001014215	363198	Rn.155071	NM_001014215		Cenpq	-	centromere protein Q	protein-coding
MACS_peak_10304	chr9	52350632	52350934	+	30.62	NA	Intergenic	RatSatRep2|Unknown|Unknown	-112048	NM_053488	85250	Rn.2875	NM_053488	ENSRNOG00000003736	Col5a2	-	collagen type V alpha 2 chain	protein-coding
MACS_peak_9011	chr7	1014080	1014384	+	30.61	NA	Intergenic	Intergenic	-130770	NM_001109460	685180	Rn.198434	NM_001109460		Stx19	-	syntaxin 19	protein-coding
MACS_peak_8458	chr6	7644130	7645260	+	30.59	NA	intron (NM_001191769, intron 21 of 36)	RNHAL1|LINE|L1	94686	NM_001191769	313865	Rn.222825	NM_001191769	ENSRNOG00000025899	Thada	RGD1560519	THADA, armadillo repeat containing	protein-coding
MACS_peak_2964	chr14	46596028	46596957	+	30.59	NA	intron (NM_147136, intron 1 of 5)	(ACAG)n|Simple_repeat|Simple_repeat	-40438	NM_001025002	310926		NM_001025002		LOC310926	Aa1011|Aa1262|Ab2-057|Ac1147	hypothetical protein LOC310926	protein-coding
MACS_peak_8071	chr5	81776018	81776626	+	30.58	NA	intron (NM_001271363, intron 6 of 22)	L1_Rn|LINE|L1	344722	NM_001012103	313264	Rn.4118	NM_001012103	ENSRNOG00000010303	Trim32	-	tripartite motif-containing 32	protein-coding
MACS_peak_44	chr1	11913372	11913800	+	30.45	NA	exon (NM_001025002, exon 2 of 7).2	exon (NM_001025002, exon 2 of 7).2	954	NM_001025002	310926		NM_001025002		LOC310926	Aa1011|Aa1262|Ab2-057|Ac1147	hypothetical protein LOC310926	protein-coding
MACS_peak_3389	chr15	28382451	28383612	+	30.43	NA	intron (NM_001271313, intron 3 of 24)	CpG	5035	NM_001271313	361034	Rn.98243	NM_001271313	ENSRNOG00000052354	Arhgef40	RGD1308093	Rho guanine nucleotide exchange factor 40	protein-coding
MACS_peak_9185	chr7	26045481	26045797	+	30.43	NA	intron (NM_001271382, intron 2 of 5)	(GGTGGT)n|Simple_repeat|Simple_repeat	95626	NM_001013172	314678	Rn.67823	NM_001013172	ENSRNOG00000006998	Fhl4	-	four and a half LIM domains 4	protein-coding
MACS_peak_3058	chr14	62240957	62241288	+	30.42	NA	Intergenic	RatSatRep2|Unknown|Unknown	-82392	NM_001100172	364148	Rn.114785	NM_001100172		Kctd8	-	potassium channel tetramerization domain containing 8	protein-coding
MACS_peak_6339	chr20	47009119	47009417	+	30.42	NA	Intergenic	CpG	199544	NM_001037656	502479	Rn.24314	NM_001037656		Afg1l	Lace1	AFG1 like ATPase	protein-coding
MACS_peak_10453	chr9	91231822	91232217	+	30.37	NA	Intergenic	L1_Rn|LINE|L1	351405	NM_001271284	301563	Rn.93479	NM_001039015	ENSRNOG00000048016	Mff	RGD1310230	mitochondrial fission factor	protein-coding
MACS_peak_6028	chr2	242907675	242908304	+	30.37	NA	Intergenic	RatSatRep2|Unknown|Unknown	25557	NM_080399	140582	Rn.19672	NM_080399		Ddit4l2	Ddit4l|Smhs1	DNA-damage-inducible transcript 4-like 2	protein-coding
MACS_peak_797	chr1	168715880	168716368	+	30.37	NA	Intergenic	RatSatRep2|Unknown|Unknown	-5664	NM_001000951	405297	Rn.141877	NM_001000951	ENSRNOG00000048293	Olr114	-	olfactory receptor 114	protein-coding
MACS_peak_5842	chr2	190209582	190210106	+	30.28	NA	Intergenic	L1_Rn|LINE|L1	82789	NM_001191708	310611	Rn.225271	NM_001191708	ENSRNOG00000021798	Pglyrp4	-	peptidoglycan recognition protein 4	protein-coding
MACS_peak_10810	chrX	38697908	38698238	+	30.26	NA	Intergenic	L1_Rn|LINE|L1	-230251	NM_001289778	317508	Rn.231886	NM_001289778	ENSRNOG00000005176	Map7d2	Brelin|Mtap7d2|RGD1564852	MAP7 domain containing 2	protein-coding
MACS_peak_7489	chr4	99337002	99337367	+	30.26	NA	Intergenic	RatSatRep2|Unknown|Unknown	-62036	NM_053438	84508	Rn.45685	NM_053438	ENSRNOG00000007272	Rnf103	Adrg34|Kf1|Zfp103	ring finger protein 103	protein-coding
MACS_peak_4247	chr17	53614579	53615757	+	30.26	NA	intron (NM_001106117, intron 22 of 27)	RatSatRep2|Unknown|Unknown	98196	NM_053421	84481	Rn.47249	NM_053421	ENSRNOG00000049751	Arid4b	Bcaa	AT-rich interaction domain 4B	protein-coding
MACS_peak_10371	chr9	68828424	68828694	+	30.26	NA	intron (NM_001191808, intron 3 of 22)	L1_Rn|LINE|L1	414220	NM_001191808	301455	Rn.214104	NM_001191808	ENSRNOG00000024345	Pard3b	-	par-3 family cell polarity regulator beta	protein-coding
MACS_peak_2015	chr11	54495397	54496046	+	30.19	NA	Intergenic	RatSatRep2|Unknown|Unknown	18720	NM_181625	288135	Rn.90340	NM_181625	ENSRNOG00000001943	Retnlg	retn1g	resistin-like gamma	protein-coding
MACS_peak_1285	chr1	251708764	251709234	+	30.14	NA	Intergenic	RatSatRep2|Unknown|Unknown	287185	NM_031606	50557	Rn.22158	NM_031606	ENSRNOG00000020723	Pten	MMAC1|Mmac|TEP1	phosphatase and tensin homolog	protein-coding
MACS_peak_4689	chr18	87086419	87086864	+	30.14	NA	Intergenic	RatSatRep2|Unknown|Unknown	-208499	NM_001191943	498898	Rn.225508	NM_001191943	ENSRNOG00000038190	Dok6	RGD1564376	docking protein 6	protein-coding
MACS_peak_11421	chrY_KL568155v1_random	504130	504448	+	30.14	NA	NA	RNHAL1|LINE|L1	NA	NA
MACS_peak_9926	chr8	88226922	88227305	+	30.11	NA	Intergenic	L1_Rn|LINE|L1	-347225	NM_023958	66014	Rn.64488	NM_023958	ENSRNOG00000012479	Impg1	Mlgapc	interphotoreceptor matrix proteoglycan 1	protein-coding
MACS_peak_11168	chrX	134446117	134446773	+	30.1	NA	Intergenic	L1_Rn|LINE|L1	272669	NM_001271190	317575	Rn.39117	NM_001271190	ENSRNOG00000003762	Smarca1	RGD1561046	SWI/SNF related, matrix associated, actin dependent regulator of chromatin, subfamily a, member 1	protein-coding
MACS_peak_3668	chr15	110436488	110436826	+	30.1	NA	intron (NM_022223, intron 3 of 4)	L1_Rn|LINE|L1	176024	NM_022223	63851	Rn.44476	NM_022223	ENSRNOG00000009288	Fgf14	Fhf4	fibroblast growth factor 14	protein-coding
MACS_peak_313	chr1	55672338	55672575	+	30.1	NA	Intergenic	B4|SINE|B4	223180	NM_001099465	685666	Rn.217930	NM_001099465	ENSRNOG00000013671	Vom2r9	RGD1564755	vomeronasal 2 receptor, 9	protein-coding
MACS_peak_9358	chr7	73728409	73729015	+	30.09	NA	intron (NM_031735, intron 8 of 10)	L1_Rn|LINE|L1	140540	NM_023966	66022	Rn.64498	NM_023966	ENSRNOG00000011369	Kcns2	-	potassium voltage-gated channel, modifier subfamily S, member 2	protein-coding
MACS_peak_1239	chr1	240575896	240576153	+	30.09	NA	intron (NM_017272, intron 14 of 17)	L1_Rn|LINE|L1	25765	NM_017272	29651	Rn.74044	NM_017272		Aldh1a7	Aldh1a4|Aldhpb	aldehyde dehydrogenase family 1, subfamily A7	protein-coding
MACS_peak_6685	chr3	84456857	84457186	+	30.09	NA	Intergenic	L1_Rn|LINE|L1	-964148	NM_001107753	311236	Rn.219303	NM_001107753	ENSRNOG00000029798	Lrrc4c	RGD1311013	leucine rich repeat containing 4C	protein-coding
MACS_peak_5818	chr2	183588901	183589258	+	30.09	NA	Intergenic	RatSatRep2|Unknown|Unknown	-6526	NM_021763	60382	Rn.162603	NM_021763	ENSRNOG00000010533	Arfip1	-	ADP-ribosylation factor interacting protein 1	protein-coding
MACS_peak_8030	chr5	68437497	68437837	+	30.05	NA	Intergenic	RatSatRep2|Unknown|Unknown	-181535	NM_001000402	298044	Rn.143205	NM_001000402	ENSRNOG00000049790	Olr848	ratchr5-70217666-70218619_ORF	olfactory receptor 848	protein-coding
MACS_peak_11006	chrX	92550086	92550898	+	30.02	NA	Intergenic	L1_Rn|LINE|L1	-45869	NM_001271228	317204	Rn.234112	NM_001271228		Pcdh11x	RGD1562864	protocadherin 11 X-linked	protein-coding
MACS_peak_3884	chr16	53874884	53875582	+	29.92	NA	Intergenic	RNHAL1|LINE|L1	-82625	NM_001290133	686103		NM_001290133	ENSRNOG00000009846	Frg1	-	FSHD region gene 1	protein-coding
MACS_peak_8113	chr5	91752372	91752629	+	29.89	NA	Intergenic	RatSatRep2|Unknown|Unknown	286646	NM_001206675	298147	Rn.2448	NM_001206675	ENSRNOG00000023946	Dmac1	RGD1309148|Tmem261	distal membrane arm assembly complex 1	protein-coding
MACS_peak_11174	chrX	136145610	136146136	+	29.85	NA	Intergenic	RatSatRep2|Unknown|Unknown	591857	NM_001000489	302821	Rn.143700	NM_001000489	ENSRNOG00000030722	Olr1765	ratchrX-136309468-136308530_ORF	olfactory receptor 1765	protein-coding
MACS_peak_4614	chr18	61306430	61306892	+	29.82	NA	intron (NM_001107382, intron 2 of 9)	intron (NM_001107382, intron 2 of 9)	45243	NM_001107382	307362	Rn.55564	NM_001107382	ENSRNOG00000017116	Zfp532	Znf532	zinc finger protein 532	protein-coding
MACS_peak_11404	chrY_KL568151v1_random	2207291	2207589	+	29.82	NA	NA	L1_Rn|LINE|L1	NA	NA
MACS_peak_51	chr1	11925822	11926555	+	29.79	NA	Intergenic	Intergenic	-11648	NM_001025002	310926		NM_001025002		LOC310926	Aa1011|Aa1262|Ab2-057|Ac1147	hypothetical protein LOC310926	protein-coding
MACS_peak_10135	chr9	8282808	8283212	+	29.79	NA	Intergenic	Intergenic	226958	NM_001007558	450235	Rn.162355	NM_001007558	ENSRNOG00000050325	Adgre4	Adgre4p|Emr4|Emr4p	adhesion G protein-coupled receptor E4	protein-coding
MACS_peak_291	chr1	55220961	55221494	+	29.76	NA	Intergenic	Intergenic	604558	NM_001099463	685557	Rn.217943	NM_001099463		Vom2r7	-	vomeronasal 2 receptor, 7	protein-coding
MACS_peak_822	chr1	169835446	169836271	+	29.73	NA	Intergenic	RatSatRep2|Unknown|Unknown	9629	NM_001000949	405294	Rn.141828	NM_001000949	ENSRNOG00000048628	Olr179	-	olfactory receptor 179	protein-coding
MACS_peak_6853	chr3	128017119	128017436	+	29.73	NA	intron (NM_001077641, intron 4 of 32)	RatSatRep2|Unknown|Unknown	296033	NM_001077641	24654	Rn.45523	NM_001077641	ENSRNOG00000004810	Plcb1	PLC'1|PLCbeta1|Phosphb|RATPHOSPHB	phospholipase C beta 1	protein-coding
MACS_peak_6553	chr3	51150683	51151065	+	29.73	NA	Intergenic	RatSatRep2|Unknown|Unknown	-96427	NM_031623	58844	Rn.30028	NM_031623	ENSRNOG00000052498	Grb14	-	growth factor receptor bound protein 14	protein-coding
MACS_peak_1896	chr11	25243206	25243589	+	29.69	NA	Intergenic	L1_Rn|LINE|L1	107541	NM_024400	79252	Rn.7897	NM_024400	ENSRNOG00000001607	Adamts1	-	ADAM metallopeptidase with thrombospondin type 1 motif, 1	protein-coding
MACS_peak_7372	chr4	77405536	77405816	+	29.66	NA	Intergenic	Intergenic	-58665	NM_001134979	312299	Rn.9027	NM_001134979	ENSRNOG00000006048	Ezh2	-	enhancer of zeste 2 polycomb repressive complex 2 subunit	protein-coding
MACS_peak_733	chr1	152606920	152607364	+	29.62	NA	Intergenic	L1_Rn|LINE|L1	489038	NM_001013896	293098	Rn.19940	NM_001013896	ENSRNOG00000016815	Tmem135	PMP52|RGD1309948	transmembrane protein 135	protein-coding
MACS_peak_10087	chr8	132951561	132952121	+	29.62	NA	Intergenic	RNHAL1|LINE|L1	-32731	NM_001106871	301086	Rn.127077	NM_001106871	ENSRNOG00000006620	Xcr1	-	X-C motif chemokine receptor 1	protein-coding
MACS_peak_1356	chr1	266886037	266886973	+	29.62	NA	intron (NM_001107604, intron 18 of 35)	(CTTCTTCTT)n|Simple_repeat|Simple_repeat	19574	NM_001107604	309458	Rn.136636	NM_001107604	ENSRNOG00000020304	Pdcd11	-	programmed cell death 11	protein-coding
MACS_peak_1952	chr11	40652606	40652882	+	29.62	NA	Intergenic	L1_Rn|LINE|L1	1170336	NM_001013184	360704	Rn.4120	NM_001013184	ENSRNOG00000050978	Hmgn1	-	high mobility group nucleosome binding domain 1	protein-coding
MACS_peak_4531	chr18	45175490	45176265	+	29.61	NA	Intergenic	RatSatRep2|Unknown|Unknown	148796	NM_001126293	498864	Rn.231132	NM_001126293	ENSRNOG00000015834	Fam170a	RGD1565393	family with sequence similarity 170, member A	protein-coding
MACS_peak_3516	chr15	60536919	60537403	+	29.6	NA	Intergenic	RatSatRep2|Unknown|Unknown	-24457	NM_057149	117516	Rn.64517	NM_057149	ENSRNOG00000049547	Tnfsf11	RANKL	TNF superfamily member 11	protein-coding
MACS_peak_8953	chr6	138445024	138445390	+	29.59	NA	Intergenic	L1_Rn|LINE|L1	12657	NM_138906	192271	Rn.24189	NM_138906	ENSRNOG00000037524	Adam6	TMDCIV	a disintegrin and metallopeptidase domain 6	protein-coding
MACS_peak_10134	chr9	8281602	8281978	+	29.58	NA	Intergenic	CpG	225738	NM_001007558	450235	Rn.162355	NM_001007558	ENSRNOG00000050325	Adgre4	Adgre4p|Emr4|Emr4p	adhesion G protein-coupled receptor E4	protein-coding
MACS_peak_6036	chr2	244544529	244545070	+	29.58	NA	intron (NM_001100993, intron 4 of 13)	L1_Rn|LINE|L1	23100	NM_001100993	499719	Rn.215031	NM_001100993	ENSRNOG00000023457	Stpg2	-	sperm-tail PG-rich repeat containing 2	protein-coding
MACS_peak_6105	chr2	266405105	266405373	+	29.57	NA	intron (NM_001085353, intron 10 of 11)	RNHAL1|LINE|L1	90197	NM_001085353	362065	Rn.103639	NM_199408	ENSRNOG00000036816	Wls	Gpr177	wntless Wnt ligand secretion mediator	protein-coding
MACS_peak_7480	chr4	98216034	98216726	+	29.54	NA	Intergenic	RatSatRep2|Unknown|Unknown	-97561	NM_001191750	171334	Rn.207395	NM_001191750	ENSRNOG00000007270	Il12rb2	-	interleukin 12 receptor subunit beta 2	protein-coding
MACS_peak_6123	chr20	1795735	1795989	+	29.53	NA	Intergenic	RatSatRep2|Unknown|Unknown	8516	NM_001006599	406039	Rn.199072	NM_001006599	ENSRNOG00000029883	Olr1738	Or12	olfactory receptor 1738	protein-coding
MACS_peak_8757	chr6	85691775	85692066	+	29.53	NA	Intergenic	RatSatRep2|Unknown|Unknown	531132	NM_001271107	500659	Rn.162868	NM_001271107	ENSRNOG00000032241	Fscb	-	fibrous sheath CABYR binding protein	protein-coding
MACS_peak_9997	chr8	105871377	105872007	+	29.52	NA	intron (NM_134377, intron 1 of 17)	RatSatRep2|Unknown|Unknown	165003	NM_134377	171394	Rn.212755	NM_134377	ENSRNOG00000043085	Clstn2	Cs2|Cstn2	calsyntenin 2	protein-coding
MACS_peak_2028	chr11	57604532	57605203	+	29.5	NA	Intergenic	RatSatRep2|Unknown|Unknown	99183	NM_031676	63837	Rn.10998	NM_031676	ENSRNOG00000059539	Tagln3	Np22|Np25	transgelin 3	protein-coding
MACS_peak_8542	chr6	31051387	31051724	+	29.45	NA	Intergenic	B2_Rat4|SINE|B2	-412266	NM_147136	257642		NM_147136		LOC257642	ribin	rRNA promoter binding protein	protein-coding
MACS_peak_10887	chrX	52502304	52502717	+	29.44	NA	Intergenic	L1_Rn|LINE|L1	-858298	NM_001005244	24907	Rn.10307	NM_012698	ENSRNOG00000046366	Dmd	DNADMD1	dystrophin	protein-coding
MACS_peak_7343	chr4	71072429	71072961	+	29.44	NA	Intergenic	RatSatRep2|Unknown|Unknown	-76300	NM_001191611	297025	Rn.163642	NM_001191611	ENSRNOG00000015682	Kel	RGD1565470	Kell blood group, metallo-endopeptidase	protein-coding
MACS_peak_2974	chr14	46610221	46610588	+	29.38	NA	intron (NM_147136, intron 1 of 5)	intron (NM_147136, intron 1 of 5)	-26526	NM_001025002	310926		NM_001025002		LOC310926	Aa1011|Aa1262|Ab2-057|Ac1147	hypothetical protein LOC310926	protein-coding
MACS_peak_3382	chr15	27626200	27626647	+	29.23	NA	Intergenic	RatSatRep2|Unknown|Unknown	26849	NM_001000835	405124	Rn.142439	NM_001000835	ENSRNOG00000053992	Olr1633	-	olfactory receptor 1633	protein-coding
MACS_peak_2934	chr14	46496327	46497205	+	29.23	NA	Intergenic	RatSatRep2|Unknown|Unknown	-140164	NM_001025002	310926		NM_001025002		LOC310926	Aa1011|Aa1262|Ab2-057|Ac1147	hypothetical protein LOC310926	protein-coding
MACS_peak_7482	chr4	98319455	98319716	+	29.09	NA	Intergenic	RatSatRep2|Unknown|Unknown	23302	NM_001009540	494343	Rn.24809	NM_001009540	ENSRNOG00000007740	Tacstd2	Prp1|Trop2	tumor-associated calcium signal transducer 2	protein-coding
MACS_peak_5414	chr2	80427672	80427896	+	29.07	NA	Intergenic	Intergenic	-19112	NM_001037648	310190	Rn.162566	NM_001037648	ENSRNOG00000012109	Otulinl	Fam105a	OTU deubiquitinase with linear linkage specificity like	protein-coding
MACS_peak_5259	chr2	49358115	49358320	+	29.05	NA	Intergenic	91ES8_RN|Satellite|Satellite	-324546	NM_053719	114511	Rn.16221	NM_053719	ENSRNOG00000060329	Emb	-	embigin	protein-coding
MACS_peak_7740	chr4	173878619	173879418	+	29.03	NA	intron (NM_053923, intron 17 of 33)	L1_Rn|LINE|L1	146770	NM_053923	116720	Rn.14870	NM_053923	ENSRNOG00000034228	Pik3c2g	-	phosphatidylinositol-4-phosphate 3-kinase, catalytic subunit type 2 gamma	protein-coding
MACS_peak_10986	chrX	84346611	84346843	+	29	NA	Intergenic	RatSatRep2|Unknown|Unknown	-179010	NM_001106934	302328	Rn.141102	NM_001106934	ENSRNOG00000004795	Pof1b	RGD1560798	POF1B, actin binding protein	protein-coding
MACS_peak_723	chr1	150166688	150167055	+	28.96	NA	Intergenic	L1_Rn|LINE|L1	6445	NM_001000936	405258	Rn.141944	NM_001000936	ENSRNOG00000050559	Olr27	-	olfactory receptor 27	protein-coding
MACS_peak_1873	chr11	18640533	18640877	+	28.93	NA	Intergenic	L1_Rn|LINE|L1	-955802	NM_001105895	288291	Rn.83908	NM_001105895	ENSRNOG00000001916	Tmprss15	Prss7	transmembrane serine protease 15	protein-coding
MACS_peak_816	chr1	169585437	169585817	+	28.92	NA	Intergenic	L1_Rn|LINE|L1	-4681	NM_001000168	293302	Rn.141847	NM_001000168	ENSRNOG00000017234	Olr155	ratchr1-162335141-162336112_ORF	olfactory receptor 155	protein-coding
MACS_peak_4081	chr17	11904861	11905473	+	28.92	NA	Intergenic	L1_Rat1|LINE|L1	-48385	NM_001107339	306782	Rn.211583	NM_001107339	ENSRNOG00000053232	Ror2	-	receptor tyrosine kinase-like orphan receptor 2	protein-coding
MACS_peak_9937	chr8	90675691	90676005	+	28.92	NA	Intergenic	L1_Rat1|LINE|L1	-11294	NM_001201355	113990	Rn.106652	NM_001007020	ENSRNOG00000031032	Hmgn3	-	high mobility group nucleosomal binding domain 3	protein-coding
MACS_peak_7982	chr5	56161124	56161836	+	28.92	NA	Intergenic	RNHAL1|LINE|L1	-263596	NM_017321	50655	Rn.35934	NM_017321	ENSRNOG00000005849	Aco1	AH|Acon1|IRP1	aconitase 1	protein-coding
MACS_peak_7612	chr4	135544436	135544720	+	28.92	NA	Intergenic	RatSatRep2|Unknown|Unknown	-474608	NM_019329	54279	Rn.10043	NM_019329	ENSRNOG00000006144	Cntn3	BIG-1|Pang	contactin 3	protein-coding
MACS_peak_312	chr1	55671171	55671402	+	28.92	NA	Intergenic	Intergenic	224350	NM_001099465	685666	Rn.217930	NM_001099465	ENSRNOG00000013671	Vom2r9	RGD1564755	vomeronasal 2 receptor, 9	protein-coding
MACS_peak_753	chr1	157600387	157600653	+	28.91	NA	Intergenic	L1_Rat1|LINE|L1	-45653	NM_001015012	308821	Rn.161854	NM_001015012	ENSRNOG00000010224	Rab30	Rsb30	RAB30, member RAS oncogene family	protein-coding
MACS_peak_652	chr1	134421718	134421988	+	28.9	NA	Intergenic	RatSatRep2|Unknown|Unknown	-277200	NM_001107524	308739	Rn.22326	NM_001107524	ENSRNOG00000012874	Rgma	-	repulsive guidance molecule BMP co-receptor a	protein-coding
MACS_peak_893	chr1	180852542	180852899	+	28.9	NA	Intergenic	SATI_RN|Satellite|Satellite	-1842463	NM_001013434	365355	Rn.3271	NM_001013434	ENSRNOG00000012258	Rras2	-	RAS related 2	protein-coding
MACS_peak_4187	chr17	43759763	43760422	+	28.9	NA	Intergenic	Intergenic	-19082	NM_001107354	306970	Rn.199026	NM_001107354		Hist1h2an	-	histone cluster 1, H2an	protein-coding
MACS_peak_5418	chr2	81289805	81290307	+	28.9	NA	Intergenic	RatSatRep2|Unknown|Unknown	-881384	NM_001037648	310190	Rn.162566	NM_001037648	ENSRNOG00000012109	Otulinl	Fam105a	OTU deubiquitinase with linear linkage specificity like	protein-coding
MACS_peak_9740	chr8	32259029	32259320	+	28.82	NA	intron (NM_053635, intron 1 of 18)	L1_Rn|LINE|L1	21639	NM_053635	114093	Rn.49170	NM_053635	ENSRNOG00000005903	St14	MT-SP1	suppression of tumorigenicity 14	protein-coding
MACS_peak_3537	chr15	66455237	66455842	+	28.82	NA	Intergenic	RatSatRep2|Unknown|Unknown	-947555	NM_017326	50663	Rn.5968	NM_017326		Calm2	CaMII|Cam|Cam2|Camb	calmodulin 2	protein-coding
MACS_peak_6838	chr3	123449951	123450798	+	28.74	NA	intron (NM_031351, intron 1 of 28)	RNHAL1|LINE|L1	15965	NM_031351	83526	Rn.53846	NM_031351	ENSRNOG00000021240	Atrn	-	attractin	protein-coding
MACS_peak_9436	chr7	96196443	96196798	+	28.69	NA	Intergenic	L1_Rn|LINE|L1	267429	NM_013153	25694	Rn.87393	NM_013153	ENSRNOG00000004854	Has2	-	hyaluronan synthase 2	protein-coding
MACS_peak_2870	chr14	23773385	23773850	+	28.68	NA	Intergenic	RatSatRep2|Unknown|Unknown	161708	NM_001004098	305270	Rn.85211	NM_001004098	ENSRNOG00000021776	Cenpc	Cenpc1	centromere protein C	protein-coding
MACS_peak_5986	chr2	228601723	228602866	+	28.68	NA	Intergenic	RatSatRep2|Unknown|Unknown	57876	NM_001107724	310846	Rn.103881	NM_001107724	ENSRNOG00000009835	Tram1l1	-	translocation associated membrane protein 1-like 1	protein-coding
MACS_peak_7138	chr4	29649633	29650313	+	28.67	NA	Intergenic	Intergenic	119929	NM_001002023	432360	Rn.185815	NM_001002023	ENSRNOG00000046905	Sgce	-	sarcoglycan, epsilon	protein-coding
MACS_peak_2042	chr11	63793422	63794334	+	28.63	NA	Intergenic	L1_Rn|LINE|L1	624504	NM_001047922	498084	Rn.202906	NM_001047922		LOC498084	-	Ab2-093	protein-coding
MACS_peak_7916	chr5	37020819	37021396	+	28.58	NA	Intergenic	L1_Rn|LINE|L1	-337751	NM_172085	29588	Rn.82733	NM_172085	ENSRNOG00000006908	Pou3f2	Brn-2|OTF-7|oct-7	POU class 3 homeobox 2	protein-coding
MACS_peak_2945	chr14	46533923	46534954	+	28.52	NA	Intergenic	Intergenic	-102492	NM_001025002	310926		NM_001025002		LOC310926	Aa1011|Aa1262|Ab2-057|Ac1147	hypothetical protein LOC310926	protein-coding
MACS_peak_7882	chr5	28561913	28562817	+	28.49	NA	intron (NM_022302, intron 6 of 12)	RatSatRep2|Unknown|Unknown	166848	NM_001024900	362490	Rn.16907	NM_001024900	ENSRNOG00000006697	Pip4p2	RGD1306225|Tmem55a	phosphatidylinositol-4,5-bisphosphate 4-phosphatase 2	protein-coding
MACS_peak_7337	chr4	70397911	70398365	+	28.47	NA	Intergenic	RatSatRep2|Unknown|Unknown	-216386	NM_001108626	362347	Rn.225509	NM_001108626	ENSRNOG00000031385	Try4	-	trypsin 4	protein-coding
MACS_peak_7391	chr4	79595296	79595617	+	28.46	NA	Intergenic	RNHAL1|LINE|L1	21446	NM_012614	24604	Rn.9714	NM_012614	ENSRNOG00000009768	Npy	NPY02|RATNPY|RATNPY02	neuropeptide Y	protein-coding
MACS_peak_4140	chr17	32895643	32895968	+	28.45	NA	Intergenic	L1_Rn|LINE|L1	-7284	NM_001031642	291091	Rn.103402	NM_001031642	ENSRNOG00000016581	Serpinb1a	Serpinb1	serpin family B member 1A	protein-coding
MACS_peak_2227	chr12	15223459	15223859	+	28.45	NA	Intergenic	RatSatRep2|Unknown|Unknown	-666543	NM_031034	81663	Rn.10497	NM_031034	ENSRNOG00000001235	Gna12	-	G protein subunit alpha 12	protein-coding
MACS_peak_7436	chr4	88164468	88164881	+	28.41	NA	Intergenic	L1_Rn|LINE|L1	-276393	NM_001108630	362374	Rn.154707	NM_001108630	ENSRNOG00000006646	Vopp1	Ecop|RGD1306494	VOPP1, WBP1/VOPP1 family member	protein-coding
MACS_peak_7236	chr4	51349041	51349749	+	28.41	NA	Intergenic	L1_Rn|LINE|L1	-149918	NM_031651	58980	Rn.9699	NM_031651	ENSRNOG00000008121	Slc13a1	-	solute carrier family 13 member 1	protein-coding
MACS_peak_10713	chrX	17228054	17228288	+	28.41	NA	Intergenic	L1_Rn|LINE|L1	211340	NM_021670	59302	Rn.42867	NM_021670	ENSRNOG00000002984	Bmp15	Gdf-9b	bone morphogenetic protein 15	protein-coding
MACS_peak_2085	chr11	78980280	78980754	+	28.41	NA	Intergenic	RatSatRep2|Unknown|Unknown	-118772	NM_001108320	360731	Rn.67389	NM_001108320	ENSRNOG00000001923	Tprg1	RGD1306226|Svap30|Tprg	tumor protein p63 regulated 1	protein-coding
MACS_peak_9320	chr7	63882647	63882948	+	28.4	NA	Intergenic	L1_Rn|LINE|L1	-40074	NM_001271273	500843	Rn.234089	NM_001109287	ENSRNOG00000028782	RGD1565498	-	similar to Hypothetical protein LOC270802	protein-coding
MACS_peak_3003	chr14	46671868	46672488	+	28.39	NA	intron (NM_001025002, intron 2 of 6)	intron (NM_001025002, intron 2 of 6)	-14805	NR_046238	100861534		NR_046238	ENSRNOG00000059852	Rn5-8s	-	5.8S ribosomal RNA	rRNA
MACS_peak_2520	chr13	33723801	33724669	+	28.39	NA	Intergenic	SATI_RN|Satellite|Satellite	527415	NM_021762	60381	Rn.156195	NM_021762	ENSRNOG00000002319	Tsn	-	translin	protein-coding
MACS_peak_8269	chr5	137822087	137822607	+	28.37	NA	Intergenic	L1_Rn|LINE|L1	-9338	NM_001000410	298474	Rn.143175	NM_001000410	ENSRNOG00000058382	Olr865	-	olfactory receptor 865	protein-coding
MACS_peak_11118	chrX	119758209	119758564	+	28.37	NA	Intergenic	RatSatRep2|Unknown|Unknown	367243	NM_012494	24182	Rn.162367	NM_012494	ENSRNOG00000050006	Agtr2	AT2-R|AT2R|AT<sub>2</sub>R	angiotensin II receptor, type 2	protein-coding
MACS_peak_2141	chr11	89425877	89426411	+	28.37	NA	Intergenic	L1_Rn|LINE|L1	-85047	NM_033651	29728	Rn.8341	NM_033651	ENSRNOG00000001833	Mcm4	Mcmd4	minichromosome maintenance complex component 4	protein-coding
MACS_peak_9679	chr8	15320660	15321768	+	28.33	NA	Intergenic	RatSatRep2|Unknown|Unknown	-309618	NM_138544	191571	Rn.210528	NM_138544	ENSRNOG00000011585	Fat3	-	FAT atypical cadherin 3	protein-coding
MACS_peak_915	chr1	180954563	180954796	+	28.32	NA	Intergenic	SATI_RN|Satellite|Satellite	-1944422	NM_001013434	365355	Rn.3271	NM_001013434	ENSRNOG00000012258	Rras2	-	RAS related 2	protein-coding
MACS_peak_8553	chr6	31068157	31069195	+	28.31	NA	Intergenic	BC1_Rn|scRNA|scRNA	-429387	NM_147136	257642		NM_147136		LOC257642	ribin	rRNA promoter binding protein	protein-coding
MACS_peak_10979	chrX	79432747	79433219	+	28.27	NA	Intergenic	RNHAL1|LINE|L1	-113641	NM_001106935	302366	Rn.218687	NM_001106935	ENSRNOG00000033458	RGD1562871	-	similar to BMI1-like protein	protein-coding
MACS_peak_6642	chr3	75700459	75700700	+	28.25	NA	Intergenic	RatSatRep2|Unknown|Unknown	-11904	NM_001000327	295813	Rn.142897	NM_001000327	ENSRNOG00000046025	Olr575	-	olfactory receptor 575	protein-coding
MACS_peak_11337	chrY_KL568141v1_random	690840	691164	+	28.2	NA	NA	L1_Rn|LINE|L1	NA	NA
MACS_peak_6858	chr3	130296064	130296321	+	28.2	NA	Intergenic	L1_Rn|LINE|L1	-181411	NM_019147	29146	Rn.88804	NM_019147	ENSRNOG00000007443	Jag1	-	jagged 1	protein-coding
MACS_peak_6630	chr3	73027522	73028026	+	28.1	NA	Intergenic	L1_Rn|LINE|L1	12275	NM_001000287	295720	Rn.142982	NM_001000287	ENSRNOG00000009526	Olr448	-	olfactory receptor 448	protein-coding
MACS_peak_2726	chr13	91206027	91208104	+	28.09	NA	Intergenic	Intergenic	23174	NM_001135992	498276	Rn.6050	NM_001135992		LOC498276	-	Fc gamma receptor II beta	protein-coding
MACS_peak_10540	chr9	114205143	114205512	+	28.08	NA	Intergenic	L1_Rn|LINE|L1	183292	NM_001107920	313121	Rn.24019	NM_001107920	ENSRNOG00000005724	Map3k7	Tak1	mitogen activated protein kinase kinase kinase 7	protein-coding
MACS_peak_6122	chr20	1712046	1712504	+	28.02	NA	Intergenic	RatSatRep2|Unknown|Unknown	-16892	NM_001000510	309583	Rn.215180	NM_001000510		Olr1733	ratchr20-1291348-1290419_ORF	olfactory receptor 1733	protein-coding
MACS_peak_11355	chrY_KL568147v1_random	330549	331224	+	28.02	NA	NA	(GAA)n|Simple_repeat|Simple_repeat	NA	NA
MACS_peak_9163	chr7	22337606	22337839	+	28	NA	Intergenic	SATI_RN|Satellite|Satellite	605437	NM_001099484	503127	Rn.217634	NM_001099484		Vom2r56	RGD1559561	vomeronasal 2 receptor, 56	protein-coding
MACS_peak_9652	chr8	5546808	5547200	+	27.95	NA	Intergenic	RatSatRep2|Unknown|Unknown	24265	NM_133530	171052	Rn.10997	NM_133530	ENSRNOG00000008478	Mmp13	-	matrix metallopeptidase 13	protein-coding
MACS_peak_876	chr1	180593018	180593241	+	27.89	NA	Intergenic	ISAT_RN|Satellite|Satellite	-1582872	NM_001013434	365355	Rn.3271	NM_001013434	ENSRNOG00000012258	Rras2	-	RAS related 2	protein-coding
MACS_peak_2586	chr13	50304420	50304789	+	27.88	NA	Intergenic	L1_Rn|LINE|L1	-43166	NM_001047925	498231	Rn.162321	NM_001047925	ENSRNOG00000029418	LOC498231	-	LRRGT00144	protein-coding
MACS_peak_1048	chr1	199185863	199186936	+	27.84	NA	Intergenic	CpG	-9034	NM_001135800	293515	Rn.160600	NM_001135800	ENSRNOG00000030907	Ctf2	Ctf2p	cardiotrophin 2	protein-coding
MACS_peak_2473	chr13	27768659	27768971	+	27.84	NA	Intergenic	L1_Rn|LINE|L1	-120580	NM_001105948	288937	Rn.104823	NM_001105948	ENSRNOG00000002396	Serpinb8	-	serpin family B member 8	protein-coding
MACS_peak_1031	chr1	195981919	195982410	+	27.83	NA	Intergenic	RatSatRep2|Unknown|Unknown	-755463	NM_001145762	100271845	Rn.222094	NM_001145762	ENSRNOG00000042706	LOC100271845	-	hypothetical protein LOC100271845	protein-coding
MACS_peak_2648	chr13	69785706	69786378	+	27.81	NA	Intergenic	RatSatRep2|Unknown|Unknown	-5023	NM_001105958	289083	Rn.137840	NM_001105958	ENSRNOG00000002352	Tsen15	RGD1308584	tRNA splicing endonuclease subunit 15	protein-coding
MACS_peak_2203	chr12	10456236	10457022	+	27.8	NA	Intergenic	Intergenic	104706	NM_001109061	498140	Rn.1331	NM_001109061		Cdk8	RGD1560888	cyclin-dependent kinase 8	protein-coding
MACS_peak_8557	chr6	32014318	32014596	+	27.79	NA	Intergenic	RNHAL1|LINE|L1	-1162369	NM_019287	54225	Rn.33815	NM_019287	ENSRNOG00000005542	Apob	Aa1064|Ac1-060|Apo B-100|ApoB-100|ApoB-48	apolipoprotein B	protein-coding
MACS_peak_3680	chr16	2404412	2404869	+	27.77	NA	Intergenic	RatSatRep2|Unknown|Unknown	-37571	NM_001013998	306231	Rn.225980	NM_001013998	ENSRNOG00000059442	Pde12	LRRGT00074|RGD1310975	phosphodiesterase 12	protein-coding
MACS_peak_622	chr1	121700763	121701289	+	27.76	NA	Intergenic	RNHAL1|LINE|L1	-507791	NR_037392	100526625		NR_037392	ENSRNOG00000049100	Mir344b-1	rno-mir-344b-1	microRNA 344b-1	ncRNA
MACS_peak_5010	chr19	62113918	62114266	+	27.76	NA	Intergenic	L1_Rn|LINE|L1	436550	NM_017022	24511	Rn.25733	NM_017022	ENSRNOG00000010966	Itgb1	-	integrin subunit beta 1	protein-coding
MACS_peak_9113	chr7	14941184	14941625	+	27.76	NA	Intergenic	RatSatRep2|Unknown|Unknown	50342	NM_173123	286904	Rn.10170	NM_173123	ENSRNOG00000032895	Cyp4f4	-	cytochrome P450, family 4, subfamily f, polypeptide 4	protein-coding
MACS_peak_2268	chr12	20531534	20531773	+	27.74	NA	intron (NM_001099509, intron 1 of 9)	RNHAL1|LINE|L1	57489	NM_001099509	501816	Rn.217928	NM_001099509	ENSRNOG00000050572	Vom2r62	-	vomeronasal 2 receptor, 62	protein-coding
MACS_peak_9651	chr8	5546116	5546509	+	27.74	NA	Intergenic	RatSatRep2|Unknown|Unknown	23573	NM_133530	171052	Rn.10997	NM_133530	ENSRNOG00000008478	Mmp13	-	matrix metallopeptidase 13	protein-coding
MACS_peak_9441	chr7	98479758	98480093	+	27.74	NA	Intergenic	L1_Rat1|LINE|L1	177119	NM_001127578	689997	Rn.8212	NM_001127578	ENSRNOG00000008271	Fam91a1	-	family with sequence similarity 91, member A1	protein-coding
MACS_peak_2950	chr14	46546000	46546483	+	27.71	NA	Intergenic	Intergenic	-90689	NM_001025002	310926		NM_001025002		LOC310926	Aa1011|Aa1262|Ab2-057|Ac1147	hypothetical protein LOC310926	protein-coding
MACS_peak_406	chr1	66753602	66753863	+	27.7	NA	Intergenic	RNHAL1|LINE|L1	-620340	NR_036045	100314273		NR_036045	ENSRNOG00000060612	Mir295-1	Mir295|rno-mir-295|rno-mir-295-1	microRNA 295-1	ncRNA
MACS_peak_6881	chr3	135108968	135109672	+	27.7	NA	Intergenic	RatSatRep2|Unknown|Unknown	-412734	NM_001126291	366205	Rn.220263	NM_001126291		Flrt3	RGD1566005	fibronectin leucine rich transmembrane protein 3	protein-coding
MACS_peak_11203	chrX	145459305	145460063	+	27.65	NA	Intergenic	RatSatRep2|Unknown|Unknown	102131	NM_001025713	317590	Rn.8063	NM_001025713	ENSRNOG00000026265	Magec2	-	MAGE family member C2	protein-coding
MACS_peak_311	chr1	55659433	55659734	+	27.65	NA	Intergenic	Intergenic	236053	NM_001099465	685666	Rn.217930	NM_001099465	ENSRNOG00000013671	Vom2r9	RGD1564755	vomeronasal 2 receptor, 9	protein-coding
MACS_peak_2603	chr13	57111754	57112092	+	27.62	NA	Intergenic	RatSatRep2|Unknown|Unknown	-19472	NM_198762	304827	Rn.212417	NM_198762	ENSRNOG00000013312	Kcnt2	Slick	potassium sodium-activated channel subfamily T member 2	protein-coding
MACS_peak_10013	chr8	110805104	110805315	+	27.52	NA	intron (NM_001104528, intron 1 of 15)	SATI_RN|Satellite|Satellite	7791	NM_001104528	24338	Rn.46606	NM_001104528	ENSRNOG00000007865	Ephb1	Ephb2|Erk|elk	Eph receptor B1	protein-coding
MACS_peak_11128	chrX	122364147	122364364	+	27.52	NA	Intergenic	L1_Rat1|LINE|L1	-143119	NM_001191760	313438	Rn.22563	NM_001191760	ENSRNOG00000013321	Dock11	-	dedicator of cytokinesis 11	protein-coding
MACS_peak_1201	chr1	229970510	229971443	+	27.46	NA	Intergenic	RatSatRep2|Unknown|Unknown	-40149	NM_001000256	293793	Rn.141688	NM_001000256	ENSRNOG00000054590	Olr352	-	olfactory receptor 352	protein-coding
MACS_peak_3268	chr14	114905268	114905812	+	27.45	NA	intron (NM_001169145, intron 3 of 3)	RNHAL1|LINE|L1	-37205	NM_001109095	498431	Rn.141252	NM_001109095	ENSRNOG00000006356	RGD1562229	-	similar to hypothetical protein FLJ40298	protein-coding
MACS_peak_3253	chr14	110495838	110496156	+	27.45	NA	Intergenic	RNHAL1|LINE|L1	-180093	NM_001191684	305600	Rn.82534	NM_001191684	ENSRNOG00000027249	Fancl	-	Fanconi anemia, complementation group L	protein-coding
MACS_peak_5610	chr2	133852708	133853044	+	27.45	NA	Intergenic	L1_Rn|LINE|L1	-3194674	NM_001106429	295010	Rn.218503	NM_001106429	ENSRNOG00000029749	Pabpc4l	RGD1559517	poly(A) binding protein, cytoplasmic 4-like	protein-coding
MACS_peak_136	chr1	24917690	24917942	+	27.44	NA	Intergenic	Intergenic	-255273	NM_001108459	361459	Rn.230112	NM_001108459		Clvs2	Clavesin-2|RGD1306801|Rlbp1l2	clavesin 2	protein-coding
MACS_peak_11101	chrX	116711045	116711453	+	27.43	NA	Intergenic	RatSatRep2|Unknown|Unknown	-72756	NM_181085	300286	Rn.92478	NM_181085	ENSRNOG00000027601	Lhfpl1	Lhfp	LHFPL tetraspan subfamily member 1	protein-coding
MACS_peak_2963	chr14	46593882	46594272	+	27.42	NA	intron (NM_147136, intron 1 of 5)	(GAG)n|Simple_repeat|Simple_repeat	-42853	NM_001025002	310926		NM_001025002		LOC310926	Aa1011|Aa1262|Ab2-057|Ac1147	hypothetical protein LOC310926	protein-coding
MACS_peak_8486	chr6	17270930	17271216	+	27.4	NA	Intergenic	L1_Rn|LINE|L1	-1550749	NM_001013047	288762	Rn.23921	NM_001013047	ENSRNOG00000002516	Mtm1	-	myotubularin 1	protein-coding
MACS_peak_11382	chrY_KL568149v1_random	450217	450759	+	27.4	NA	NA	(CTT)n|Simple_repeat|Simple_repeat	NA	NA
MACS_peak_1204	chr1	230028128	230028891	+	27.35	NA	Intergenic	RatSatRep2|Unknown|Unknown	-2405	NM_001001045	405931	Rn.141687	NM_001001045	ENSRNOG00000061455	Olr354	-	olfactory receptor 354	protein-coding
MACS_peak_4742	chr19	9451535	9451977	+	27.34	NA	Intergenic	L1_Rat1|LINE|L1	-135881	NM_013177	25721	Rn.98650	NM_013177	ENSRNOG00000011782	Got2	ASPATA|mAAT	glutamic-oxaloacetic transaminase 2	protein-coding
MACS_peak_1550	chr10	44825129	44825337	+	27.33	NA	Intergenic	IMPB_02|Satellite|Satellite	20602	NM_001000769	405044	Rn.142118	NM_001000769	ENSRNOG00000046759	Olr1460	-	olfactory receptor 1460	protein-coding
MACS_peak_866	chr1	179684648	179684980	+	27.28	NA	Intergenic	(TTC)n|Simple_repeat|Simple_repeat	-674557	NM_001013434	365355	Rn.3271	NM_001013434	ENSRNOG00000012258	Rras2	-	RAS related 2	protein-coding
MACS_peak_2906	chr14	37611121	37611706	+	27.28	NA	Intergenic	Intergenic	-135995	NM_001013874	289590	Rn.98296	NM_001013874	ENSRNOG00000002205	Ociad1	-	OCIA domain containing 1	protein-coding
MACS_peak_2267	chr12	20025985	20026300	+	27.28	NA	Intergenic	RatSatRep2|Unknown|Unknown	-32232	NM_001099508	501815	Rn.217945	NM_001099508		Vom2r61	RGD1562930	vomeronasal 2 receptor, 61	protein-coding
MACS_peak_5070	chr2	4720583	4721185	+	27.28	NA	Intergenic	RatSatRep2|Unknown|Unknown	-79481	NM_001000193	293353	Rn.141805	NM_001000193	ENSRNOG00000049967	Olr206	-	olfactory receptor 206	protein-coding
MACS_peak_5971	chr2	224898158	224898656	+	27.28	NA	intron (NM_001014176, intron 3 of 3)	intron (NM_001014176, intron 3 of 3)	47024	NM_001014176	362031	Rn.136923	NM_001014176	ENSRNOG00000011528	Alg14	RGD1312003	ALG14, UDP-N-acetylglucosaminyltransferase subunit	protein-coding
MACS_peak_7586	chr4	126249146	126249364	+	27.28	NA	intron (NM_001030045, intron 1 of 22)	(GAA)n|Simple_repeat|Simple_repeat	50155	NM_001030045	500261	Rn.95239	NM_001030045	ENSRNOG00000022060	Magi1	BAP-1|Baiap1|MAGI-1	membrane associated guanylate kinase, WW and PDZ domain containing 1	protein-coding
MACS_peak_11023	chrX	97492179	97492454	+	27.28	NA	Intergenic	RNHAL1|LINE|L1	417606	NM_001106968	302776	Rn.218606	NM_001106968	ENSRNOG00000042823	RGD1561230	-	similar to RIKEN cDNA 4921511C20 gene	protein-coding
MACS_peak_748	chr1	156449413	156450094	+	27.27	NA	intron (NM_022282, intron 2 of 22)	RNHAL1|LINE|L1	-122401	NM_001134833	293107	Rn.108932	NM_001134833	ENSRNOG00000022766	Ccdc89	RGD1305335	coiled-coil domain containing 89	protein-coding
MACS_peak_7829	chr5	14375401	14375653	+	27.25	NA	Intergenic	RNHAL1|LINE|L1	-7629	NM_001013929	297797	Rn.21454	NM_001013929	ENSRNOG00000030862	Atp6v1h	CGI-11|SFD|SFDalpha|SFDbeta|VMA13	ATPase H+ transporting V1 subunit H	protein-coding
MACS_peak_1065	chr1	205000847	205001189	+	27.25	NA	TTS (NM_053335)	TTS (NM_053335)	29547	NM_053335	81717	Rn.138124	NM_053335	ENSRNOG00000017326	Ctbp2	-	C-terminal binding protein 2	protein-coding
MACS_peak_8790	chr6	91680254	91680471	+	27.25	NA	non-coding (NR_110377, exon 1 of 1).2	non-coding (NR_110377, exon 1 of 1).2	162	NR_110377	102723236		NR_110377	ENSRNOG00000061096	Rn7sl1	-	RNA, 7SL, cytoplasmic 1	ncRNA
MACS_peak_6756	chr3	99391077	99391319	+	27.22	NA	Intergenic	RatSatRep2|Unknown|Unknown	973058	NM_001024981	295985	Rn.160141	NM_001024981	ENSRNOG00000004926	Mettl15	RGD1304978	methyltransferase like 15	protein-coding
MACS_peak_11068	chrX	108066430	108067033	+	27.22	NA	Intergenic	L1_Rn|LINE|L1	-220303	NM_001166342	300913	Rn.208232	NM_001166342	ENSRNOG00000062221	Il1rapl2	RGD1561761	interleukin 1 receptor accessory protein-like 2	protein-coding
MACS_peak_3885	chr16	53882616	53883053	+	27.22	NA	Intergenic	RatSatRep2|Unknown|Unknown	-75024	NM_001290133	686103		NM_001290133	ENSRNOG00000009846	Frg1	-	FSHD region gene 1	protein-coding
MACS_peak_10231	chr9	28403940	28404602	+	27.21	NA	Intergenic	RNHAL1|LINE|L1	-263157	NM_001134643	259273	Rn.32232	NM_001134643	ENSRNOG00000013781	Kcnq5	Kcnq5l	potassium voltage-gated channel subfamily Q member 5	protein-coding
MACS_peak_6882	chr3	135442993	135443228	+	27.2	NA	Intergenic	L1_Rn|LINE|L1	-746524	NM_001126291	366205	Rn.220263	NM_001126291		Flrt3	RGD1566005	fibronectin leucine rich transmembrane protein 3	protein-coding
MACS_peak_9875	chr8	73402743	73403113	+	27.17	NA	Intergenic	RatSatRep2|Unknown|Unknown	132067	NR_131088	100911360		NR_131088		LOC100911360	-	uncharacterized LOC100911360	ncRNA
MACS_peak_7588	chr4	127553908	127554818	+	27.16	NA	intron (NM_001100750, intron 10 of 10)	L1_Rn|LINE|L1	270607	NM_001100750	362404	Rn.234329	NM_001100750	ENSRNOG00000005686	Suclg2	-	succinate-CoA ligase, GDP-forming, beta subunit	protein-coding
MACS_peak_5507	chr2	105021190	105021455	+	27.14	NA	intron (NM_019300, intron 9 of 10)	L1_Rn|LINE|L1	26667	NM_019300	54242	Rn.10700	NM_019300	ENSRNOG00000011181	Cpa3	-	carboxypeptidase A3	protein-coding
MACS_peak_10361	chr9	66868348	66868664	+	27.14	NA	intron (NM_199410, intron 2 of 12)	L1_Rn|LINE|L1	9464	NM_199410	363237	Rn.106890	NM_199410	ENSRNOG00000017340	Wdr12	-	WD repeat domain 12	protein-coding
MACS_peak_7426	chr4	87283100	87283594	+	27.12	NA	Intergenic	RatSatRep2|Unknown|Unknown	-2212	NM_001107862	312373	Rn.36789	NM_001107862	ENSRNOG00000005981	Nt5c3a	Nt5c3	5'-nucleotidase, cytosolic IIIA	protein-coding
MACS_peak_945	chr1	181295007	181295237	+	27.07	NA	Intergenic	ISAT_RN|Satellite|Satellite	-2284865	NM_001013434	365355	Rn.3271	NM_001013434	ENSRNOG00000012258	Rras2	-	RAS related 2	protein-coding
MACS_peak_314	chr1	55701074	55701597	+	27.02	NA	Intergenic	Intergenic	194301	NM_001099465	685666	Rn.217930	NM_001099465	ENSRNOG00000013671	Vom2r9	RGD1564755	vomeronasal 2 receptor, 9	protein-coding
MACS_peak_48	chr1	11919550	11919912	+	27	NA	Intergenic	Intergenic	-5191	NM_001025002	310926		NM_001025002		LOC310926	Aa1011|Aa1262|Ab2-057|Ac1147	hypothetical protein LOC310926	protein-coding
MACS_peak_7946	chr5	46756598	46757184	+	26.96	NA	Intergenic	L1_Rn|LINE|L1	-429667	NM_001107920	313121	Rn.24019	NM_001107920	ENSRNOG00000005724	Map3k7	Tak1	mitogen activated protein kinase kinase kinase 7	protein-coding
MACS_peak_11397	chrY_KL568151v1_random	1321304	1321640	+	26.96	NA	NA	RatSatRep2|Unknown|Unknown	NA	NA
MACS_peak_7212	chr4	44921978	44922611	+	26.96	NA	Intergenic	L1_Rn|LINE|L1	-13996	NM_001009180	493810	Rn.17868	NM_001009180	ENSRNOG00000056207	Capza2	-	capping actin protein of muscle Z-line alpha subunit 2	protein-coding
MACS_peak_78	chr1	12969754	12970120	+	26.96	NA	Intergenic	RatSatRep2|Unknown|Unknown	54156	NM_001135859	308622	Rn.165855	NM_001135859	ENSRNOG00000060021	Txlnb	RGD1307979	taxilin beta	protein-coding
MACS_peak_6115	chr20	547932	548197	+	26.95	NA	Intergenic	L1_Rn|LINE|L1	8918	NM_001000269	294150	Rn.142692	NM_001000269	ENSRNOG00000047702	Olr1683	-	olfactory receptor 1683	protein-coding
MACS_peak_4346	chr17	88439330	88439645	+	26.91	NA	intron (NM_001170326, intron 2 of 10)	(TTC)n|Simple_repeat|Simple_repeat	224356	NM_001170326	291352	Rn.146822	NM_001170326	ENSRNOG00000024832	Gpr158	-	G protein-coupled receptor 158	protein-coding
MACS_peak_5923	chr2	212797165	212797447	+	26.88	NA	intron (NM_001106465, intron 3 of 7)	L1_Rn|LINE|L1	275164	NM_001106465	295382	Rn.162628	NM_001106465	ENSRNOG00000031136	Ntng1	RGD1563465	netrin G1	protein-coding
MACS_peak_10872	chrX	48259855	48260675	+	26.88	NA	Intergenic	L1_Rn|LINE|L1	-518845	NM_001109317	501569	Rn.16447	NM_001109317	ENSRNOG00000030418	Tmem47	RGD1564799	transmembrane protein 47	protein-coding
MACS_peak_3005	chr14	46678442	46678701	+	26.88	NA	intron (NM_001025002, intron 2 of 6)	CpG	-8412	NR_046238	100861534		NR_046238	ENSRNOG00000059852	Rn5-8s	-	5.8S ribosomal RNA	rRNA
MACS_peak_3194	chr14	94542808	94543038	+	26.85	NA	Intergenic	Intergenic	-2047029	NM_001107236	305497	Rn.114948	NM_001107236	ENSRNOG00000004281	Cobl	-	cordon-bleu WH2 repeat protein	protein-coding
MACS_peak_5630	chr2	138620311	138620598	+	26.83	NA	Intergenic	RatSatRep2|Unknown|Unknown	213411	NM_001100524	295027	Rn.61115	NM_001100524	ENSRNOG00000009949	Pcdh18	-	protocadherin 18	protein-coding
MACS_peak_3719	chr16	15169428	15169737	+	26.83	NA	Intergenic	RatSatRep2|Unknown|Unknown	-57997	NM_001115040	683469	Rn.219079	NM_001115040	ENSRNOG00000039601	LOC683469	-	similar to RNA polymerase II transcription factor SIII subunit A2 (Elongin A2) (EloA2) (Transcription elongation factor B polypeptide 3B)	protein-coding
MACS_peak_7169	chr4	38404024	38404295	+	26.83	NA	Intergenic	L1_Rn|LINE|L1	148977	NM_001110492	500030	Rn.117647	NM_001110492	ENSRNOG00000005775	Phf14	RGD1563764	PHD finger protein 14	protein-coding
MACS_peak_7770	chr4	180139582	180140079	+	26.81	NA	Intergenic	Intergenic	77031	NM_001191753	312846	Rn.228969	NM_001191753	ENSRNOG00000015986	Rassf8	RGD1308820	Ras association domain family member 8	protein-coding
MACS_peak_3539	chr15	67130074	67130414	+	26.8	NA	Intergenic	RNHAL1|LINE|L1	-425591	NM_001107279	306055	Rn.225010	NM_001107279	ENSRNOG00000008970	Pcdh17	-	protocadherin 17	protein-coding
MACS_peak_7208	chr4	44493641	44494075	+	26.8	NA	Intergenic	L1_Rat1|LINE|L1	-79406	NM_131914	363425	Rn.81070	NM_131914	ENSRNOG00000057713	Cav2	-	caveolin 2	protein-coding
MACS_peak_8862	chr6	114889820	114890050	+	26.78	NA	Intergenic	L1_Rat2|LINE|L1	-280934	NM_012888	25360	Rn.87913	NM_012888	ENSRNOG00000003972	Tshr	TSHRA	thyroid stimulating hormone receptor	protein-coding
MACS_peak_4212	chr17	46335241	46335551	+	26.77	NA	Intergenic	RatSatRep2|Unknown|Unknown	-220370	NM_001191940	498757	Rn.163362	NM_001191940	ENSRNOG00000054964	Aoah	RGD1560514	acyloxyacyl hydrolase	protein-coding
MACS_peak_10103	chr9	2002229	2002465	+	26.75	NA	Intergenic	MLTR11A|LTR|ERVK	-17693	NM_001106880	301173	Rn.204118	NM_001106880	ENSRNOG00000013368	Plcl2	-	phospholipase C-like 2	protein-coding
MACS_peak_3411	chr15	34075895	34076221	+	26.74	NA	Intergenic	L1_Rn|LINE|L1	-79446	NM_153315	266686	Rn.12783	NM_153315	ENSRNOG00000018239	Dhrs4	PSCD	dehydrogenase/reductase 4	protein-coding
MACS_peak_6328	chr20	43454720	43455268	+	26.71	NA	Intergenic	RatSatRep2|Unknown|Unknown	-346796	NM_053447	84577	Rn.1797	NM_053447	ENSRNOG00000000604	Hdac2	-	histone deacetylase 2	protein-coding
MACS_peak_11187	chrX	139755886	139756273	+	26.68	NA	intron (NM_012774, intron 2 of 9)	RatSatRep2|Unknown|Unknown	191014	NM_012774	25236	Rn.9717	NM_012774	ENSRNOG00000060179	Gpc3	OCI-5	glypican 3	protein-coding
MACS_peak_11499	chrY_KL568161v1_random	4048181	4048658	+	26.68	NA	NA	RatSatRep2|Unknown|Unknown	NA	NA
MACS_peak_11095	chrX	115220959	115221202	+	26.68	NA	Intergenic	RatSatRep2|Unknown|Unknown	-45781	NM_053379	84394	Rn.121471	NM_053379	ENSRNOG00000047712	Dcx	-	doublecortin	protein-coding
MACS_peak_10144	chr9	8481519	8481930	+	26.68	NA	Intergenic	NICER19B-int|LTR|ERV1	425672	NM_001007558	450235	Rn.162355	NM_001007558	ENSRNOG00000050325	Adgre4	Adgre4p|Emr4|Emr4p	adhesion G protein-coupled receptor E4	protein-coding
MACS_peak_6062	chr2	253375013	253375364	+	26.68	NA	Intergenic	L1_Rn|LINE|L1	-683302	NM_001077645	293508	Rn.202491	NM_001077645	ENSRNOG00000004978	Prkacb	-	protein kinase cAMP-activated catalytic subunit beta	protein-coding
MACS_peak_9899	chr8	82586336	82586560	+	26.62	NA	intron (NM_053856, intron 11 of 11)	(GGTGGT)n|Simple_repeat|Simple_repeat	25687	NM_001106839	300839	Rn.7432	NM_001106839	ENSRNOG00000010642	Lysmd2	RGD1304585	LysM domain containing 2	protein-coding
MACS_peak_4628	chr18	66433006	66433779	+	26.59	NA	Intergenic	RatSatRep2|Unknown|Unknown	619366	NM_001115025	680172	Rn.4085	NM_001115025	ENSRNOG00000011853	Mbd2	-	methyl-CpG binding domain protein 2	protein-coding
MACS_peak_10341	chr9	61494076	61494352	+	26.58	NA	intron (NM_001191807, intron 1 of 27)	RatSatRep2|Unknown|Unknown	35266	NM_001191807	301415	Rn.136174	NM_001191807	ENSRNOG00000021384	Ankrd44	RGD1561893	ankyrin repeat domain 44	protein-coding
MACS_peak_1718	chr10	87743838	87744170	+	26.58	NA	Intergenic	L1_Rn|LINE|L1	-88762	NM_001109409	680454	Rn.218570	NM_001109409	ENSRNOG00000036838	Krtap31-1	-	keratin associated protein 31-1	protein-coding
MACS_peak_7034	chr4	4208674	4208988	+	26.58	NA	intron (NM_022850, intron 6 of 25)	RatSatRep2|Unknown|Unknown	249191	NM_001107844	311944	Rn.136961	NM_001107844	ENSRNOG00000007131	Paxip1	-	PAX interacting protein 1	protein-coding
MACS_peak_11502	chrY_KL568161v1_random	4950729	4950948	+	26.57	NA	NA	RatSatRep2|Unknown|Unknown	NA	NA
MACS_peak_8621	chr6	51936534	51937114	+	26.56	NA	Intergenic	L1_Rn|LINE|L1	-185261	NM_177928	297508	Rn.203508	NM_177928	ENSRNOG00000009754	Nampt	Pbef|Pbef1	nicotinamide phosphoribosyltransferase	protein-coding
MACS_peak_2564	chr13	42791915	42792357	+	26.56	NA	Intergenic	L1_Rn|LINE|L1	-529112	NM_001007727	360838	Rn.231867	NM_001007727	ENSRNOG00000003453	Lypd1	Lypdc1	Ly6/Plaur domain containing 1	protein-coding
MACS_peak_3321	chr15	11613022	11613241	+	26.56	NA	Intergenic	L1_Rn|LINE|L1	299785	NM_001270861	117955	Rn.26856	NM_058211	ENSRNOG00000005957	Slc4a7	NBC3|NBCn1	solute carrier family 4 member 7	protein-coding
MACS_peak_6583	chr3	60902910	60903201	+	26.51	NA	Intergenic	L1_Rn|LINE|L1	-89187	NM_001361400	114630	Rn.2180	NM_053756	ENSRNOG00000001596	Atp5mc3	Atp5g3	ATP synthase membrane subunit c locus 3	protein-coding
MACS_peak_2404	chr13	5171581	5171854	+	26.49	NA	Intergenic	RNIAP1a|LTR|ERVK	-1141160	NM_001047866	297846	Rn.234265	NM_001047866	ENSRNOG00000043185	Cntnap5c	Caspr5-4|Cntnap5|Cntnap5d|RGD1566343	contactin associated protein-like 5C	protein-coding
MACS_peak_10613	chrUn_KL568458v1	25345	25850	+	26.48	NA	Intergenic	Intergenic	81216	NM_021753	60372	Rn.43875	NM_021753	ENSRNOG00000054671	Pga5	Pepf	pepsinogen 5, group I	protein-coding
MACS_peak_10491	chr9	101430448	101431253	+	26.42	NA	Intergenic	RatSatRep2|Unknown|Unknown	-42031	NM_001015019	316643	Rn.108412	NM_001015019	ENSRNOG00000051180	Chchd2	-	coiled-coil-helix-coiled-coil-helix domain containing 2	protein-coding
MACS_peak_10082	chr8	132016813	132017141	+	26.42	NA	Intergenic	RatSatRep2|Unknown|Unknown	12488	NM_001047920	367195	Rn.202516	NM_001047920	ENSRNOG00000031912	LOC367195	Ab2-073	similar to 60S RIBOSOMAL PROTEIN L7	protein-coding
MACS_peak_4829	chr19	27819762	27820109	+	26.35	NA	Intergenic	(GA)n|Simple_repeat|Simple_repeat	42892	NM_001014221	363337	Rn.198445	NM_001014221	ENSRNOG00000042971	LOC363337	-	similar to RIKEN cDNA 1700081O22	protein-coding
MACS_peak_10905	chrX	55946741	55947519	+	26.31	NA	intron (NM_177935, intron 4 of 9)	L1_Rn|LINE|L1	818763	NM_177935	317553	Rn.214479	NM_177935	ENSRNOG00000029663	Il1rapl1	Il1rapl	interleukin 1 receptor accessory protein-like 1	protein-coding
MACS_peak_8870	chr6	115783582	115784128	+	26.31	NA	Intergenic	RatSatRep2|Unknown|Unknown	-166997	NM_177933	314352	Rn.162892	NM_177933	ENSRNOG00000004464	Sel1l	Sel1h	SEL1L ERAD E3 ligase adaptor subunit	protein-coding
MACS_peak_1999	chr11	51435114	51435846	+	26.31	NA	Intergenic	RatSatRep2|Unknown|Unknown	-232777	NM_133601	171136	Rn.21799	NM_133601	ENSRNOG00000001982	Cblb	-	Cbl proto-oncogene B	protein-coding
MACS_peak_4384	chr18	5383501	5383811	+	26.27	NA	Intergenic	RatSatRep2|Unknown|Unknown	-69145	NM_001107403	307579	Rn.102276	NM_001107403	ENSRNOG00000016874	Zfp521	Znf521	zinc finger protein 521	protein-coding
MACS_peak_10230	chr9	28103091	28103411	+	26.24	NA	intron (NM_001134643, intron 2 of 15)	L1_Rn|LINE|L1	37863	NM_001134643	259273	Rn.32232	NM_001134643	ENSRNOG00000013781	Kcnq5	Kcnq5l	potassium voltage-gated channel subfamily Q member 5	protein-coding
MACS_peak_2527	chr13	33819637	33820425	+	26.19	NA	Intergenic	SATI_RN|Satellite|Satellite	431619	NM_021762	60381	Rn.156195	NM_021762	ENSRNOG00000002319	Tsn	-	translin	protein-coding
MACS_peak_6855	chr3	128627983	128628250	+	26.17	NA	intron (NM_024353, intron 1 of 38)	L1_Rn|LINE|L1	26786	NM_024353	25031	Rn.6155	NM_024353	ENSRNOG00000033119	Plcb4	Beta4aa|RATBETA4AA	phospholipase C, beta 4	protein-coding
MACS_peak_7099	chr4	25454660	25455125	+	26.17	NA	Intergenic	L1_Rn|LINE|L1	19007	NM_001106629	297738	Rn.51773	NM_001106629	ENSRNOG00000000017	Steap1	Steap	STEAP family member 1	protein-coding
MACS_peak_7385	chr4	78545897	78546576	+	26.17	NA	Intergenic	L1_Rn|LINE|L1	-17389	NM_199233	312316	Rn.79162	NM_199233	ENSRNOG00000023612	Doxl1	-	diamine oxidase-like protein 1	protein-coding
MACS_peak_5815	chr2	182830129	182830477	+	26.17	NA	Intergenic	L1_Rn|LINE|L1	15758	NM_198769	310553	Rn.46387	NM_198769	ENSRNOG00000009822	Tlr2	-	toll-like receptor 2	protein-coding
MACS_peak_7967	chr5	52235041	52235302	+	26.17	NA	Intergenic	L1_Rat1|LINE|L1	226553	NR_032756	100314210		NR_032756	ENSRNOG00000041320	Mir876	rno-mir-876	microRNA 876	ncRNA
MACS_peak_5800	chr2	179348036	179348384	+	26.16	NA	Intergenic	L1_Rn|LINE|L1	243211	NR_037389	100526643		NR_037389	ENSRNOG00000047006	Mir2985	rno-mir-2985	microRNA 2985	ncRNA
MACS_peak_3110	chr14	74041913	74042690	+	26.16	NA	Intergenic	RNHAL1|LINE|L1	152964	NM_053978	117049	Rn.4023	NM_053978	ENSRNOG00000017074	Rab28	-	RAB28, member RAS oncogene family	protein-coding
MACS_peak_6646	chr3	75887987	75888749	+	26.16	NA	Intergenic	L1_Rn|LINE|L1	-8652	NM_001000661	404861	Rn.142890	NM_001000661	ENSRNOG00000005742	Olr584	-	olfactory receptor 584	protein-coding
MACS_peak_10165	chr9	12099512	12099872	+	26.16	NA	Intergenic	Intergenic	-534298	NM_001109414	680486	Rn.136288	NM_001109414	ENSRNOG00000023474	Dazl	-	deleted in azoospermia-like	protein-coding
MACS_peak_7182	chr4	42114074	42114764	+	26.16	NA	Intergenic	RatSatRep2|Unknown|Unknown	-88419	NM_001105668	362325	Rn.18295	NM_001105668	ENSRNOG00000053787	Mdfic	Kdt1	MyoD family inhibitor domain containing	protein-coding
MACS_peak_1	chr1	50256	50472	+	26.13	NA	Intergenic	(CCCTAA)n|Simple_repeat|Simple_repeat	-346336	NM_001099460	502213	Rn.217622	NM_001099460		Vom2r3	RGD1565892	vomeronasal 2 receptor, 3	protein-coding
MACS_peak_749	chr1	156788532	156788788	+	26.12	NA	intron (NM_022282, intron 7 of 22)	L1_Rat1|LINE|L1	-461308	NM_001134833	293107	Rn.108932	NM_001134833	ENSRNOG00000022766	Ccdc89	RGD1305335	coiled-coil domain containing 89	protein-coding
MACS_peak_9631	chr8	181876	182212	+	26.07	NA	Intergenic	Intergenic	-225957	NM_023956	66012	Rn.209304	NM_023956	ENSRNOG00000029876	Gucy1a2	-	guanylate cyclase 1 soluble subunit alpha 2	protein-coding
MACS_peak_5344	chr2	67655061	67655342	+	26.06	NA	Intergenic	L1_Rn2|LINE|L1	662888	NM_001168630	29163	Rn.222436	NM_001168630	ENSRNOG00000033837	Cdh9	-	cadherin 9	protein-coding
MACS_peak_10225	chr9	26114595	26114854	+	26.03	NA	Intergenic	L1_Rn|LINE|L1	-677040	NR_031921	100314052		NR_031921	ENSRNOG00000035498	Mir206	rno-mir-206	microRNA 206	ncRNA
MACS_peak_11261	chrY	360924	361426	+	26.03	NA	Intergenic	RatSatRep2|Unknown|Unknown	33999	NM_012772	25221		NM_012772	ENSRNOG00000062090	Sry	SRYGENE|Sry1|Sry3BI|Tdf|Tdy	sex determining region Y	protein-coding
MACS_peak_8178	chr5	111787961	111788192	+	26.03	NA	Intergenic	RNHAL1|LINE|L1	-1461136	NM_001109357	502968	Rn.218625	NM_001109357	ENSRNOG00000033600	Zfp352	RGD1563227	zinc finger protein 352	protein-coding
MACS_peak_6813	chr3	117321666	117322034	+	26.03	NA	Intergenic	RNHAL1|LINE|L1	-13362	NM_001107769	311387	Rn.162699	NM_001107769	ENSRNOG00000005158	Slc24a5	-	solute carrier family 24 member 5	protein-coding
MACS_peak_9469	chr7	104192232	104192603	+	26.02	NA	Intergenic	RatSatRep2|Unknown|Unknown	294293	NM_001134495	299908	Rn.82172	NM_001134495	ENSRNOG00000054576	Gsdmc	Gsdmc1|Mlze	gasdermin C	protein-coding
MACS_peak_1934	chr11	36817846	36818526	+	26.02	NA	Intergenic	L1_Rn|LINE|L1	-32849	NM_013002	25510	Rn.9736	NM_013002	ENSRNOG00000001628	Pcp4	PEPZ19|pep-19	Purkinje cell protein 4	protein-coding
MACS_peak_3482	chr15	53794900	53795249	+	26	NA	Intergenic	L1_Rat1|LINE|L1	733406	NM_001107278	306022		NM_001107278	ENSRNOG00000014478	Fndc3a	Fndc3	fibronectin type III domain containing 3a	protein-coding
MACS_peak_2266	chr12	19991749	19992050	+	26	NA	intron (NM_001099508, intron 2 of 8)	RatSatRep2|Unknown|Unknown	2011	NM_001099508	501815	Rn.217945	NM_001099508		Vom2r61	RGD1562930	vomeronasal 2 receptor, 61	protein-coding
MACS_peak_1347	chr1	265444882	265445586	+	26	NA	Intergenic	RNHAL1|LINE|L1	-24731	NM_001107600	309444	Rn.219325	NM_001107600	ENSRNOG00000046211	Fbxw4	-	F-box and WD repeat domain containing 4	protein-coding
MACS_peak_4716	chr19	4938263	4938570	+	26	NA	Intergenic	L1_Rn|LINE|L1	-1093519	NM_053393	84408	Rn.214220	NM_053393	ENSRNOG00000056643	Cdh8	-	cadherin 8	protein-coding
MACS_peak_2574	chr13	47275958	47276399	+	25.99	NA	Intergenic	L1_Rn|LINE|L1	55009	NM_001270845	289010	Rn.97596	NM_182815	ENSRNOG00000025862	Zp3r	sp56	zona pellucida 3 receptor	protein-coding
MACS_peak_10140	chr9	8381540	8381837	+	25.98	NA	Intergenic	Intergenic	325636	NM_001007558	450235	Rn.162355	NM_001007558	ENSRNOG00000050325	Adgre4	Adgre4p|Emr4|Emr4p	adhesion G protein-coupled receptor E4	protein-coding
MACS_peak_848	chr1	175287725	175287969	+	25.97	NA	intron (NM_001134970, intron 2 of 39)	RatSatRep2|Unknown|Unknown	132259	NM_001134970	691042	Rn.37595	NM_001134970	ENSRNOG00000009812	Sbf2	Mtmr13|RGD1559442	SET binding factor 2	protein-coding
MACS_peak_8831	chr6	105147807	105148330	+	25.97	NA	Intergenic	RNHAL1|LINE|L1	12402	NM_020305	57022	Rn.209651	NM_020305	ENSRNOG00000038275	Adam4	tMDCV	a disintegrin and metalloprotease domain 4	protein-coding
MACS_peak_7483	chr4	98417310	98417826	+	25.87	NA	Intergenic	RatSatRep2|Unknown|Unknown	-74681	NM_001009540	494343	Rn.24809	NM_001009540	ENSRNOG00000007740	Tacstd2	Prp1|Trop2	tumor-associated calcium signal transducer 2	protein-coding
MACS_peak_2714	chr13	89445458	89446393	+	25.85	NA	Intergenic	MTD-int|LTR|ERVL-MaLR	-34133	NM_001109075	498278	Rn.7902	NM_001109075	ENSRNOG00000034221	Cfap126	RGD1562658	cilia and flagella associated protein 126	protein-coding
MACS_peak_4106	chr17	21981173	21981932	+	25.83	NA	Intergenic	RatSatRep2|Unknown|Unknown	161772	NM_012548	24323	Rn.10918	NM_012548	ENSRNOG00000014361	Edn1	Et1	endothelin 1	protein-coding
MACS_peak_9965	chr8	97787485	97788276	+	25.81	NA	Intergenic	L1_Rn|LINE|L1	-140808	NM_001108175	315880	Rn.1821	NM_001108175	ENSRNOG00000014543	Tbc1d2b	RGD1307436	TBC1 domain family, member 2B	protein-coding
MACS_peak_10091	chr9	72429	73545	+	25.8	NA	intron (NM_001106879, intron 5 of 12)	RatSatRep2|Unknown|Unknown	24999	NM_001106879	301168	Rn.163039	NM_001106879	ENSRNOG00000012618	Efhb	RGD1566407	EF hand domain family, member B	protein-coding
MACS_peak_8167	chr5	108365100	108365324	+	25.8	NA	Intergenic	RatSatRep2|Unknown|Unknown	86995	NM_001107945	313352	Rn.43064	NM_001107945	ENSRNOG00000024093	Dmrta1	-	DMRT-like family A1	protein-coding
MACS_peak_899	chr1	180886120	180886364	+	25.78	NA	Intergenic	SATI_RN|Satellite|Satellite	-1875985	NM_001013434	365355	Rn.3271	NM_001013434	ENSRNOG00000012258	Rras2	-	RAS related 2	protein-coding
MACS_peak_2510	chr13	33570685	33571530	+	25.76	NA	Intergenic	SATI_RN|Satellite|Satellite	680543	NM_021762	60381	Rn.156195	NM_021762	ENSRNOG00000002319	Tsn	-	translin	protein-coding
MACS_peak_6677	chr3	83214552	83215077	+	25.75	NA	intron (NM_001107752, intron 22 of 24)	RatSatRep2|Unknown|Unknown	-77421	NR_031792	100313984		NR_031792	ENSRNOG00000035542	Mir129-2	rno-mir-129-2	microRNA 129-2	ncRNA
MACS_peak_2996	chr14	46656876	46657097	+	25.75	NA	intron (NM_001025002, intron 2 of 6)	intron (NM_001025002, intron 2 of 6)	-5160	NM_147136	257642		NM_147136		LOC257642	ribin	rRNA promoter binding protein	protein-coding
MACS_peak_10602	chrUn_KL568387v1	30445	30648	+	25.72	NA	NA	Intergenic	NA	NA
MACS_peak_755	chr1	157605876	157606154	+	25.71	NA	Intergenic	RatSatRep2|Unknown|Unknown	-40158	NM_001015012	308821	Rn.161854	NM_001015012	ENSRNOG00000010224	Rab30	Rsb30	RAB30, member RAS oncogene family	protein-coding
MACS_peak_6875	chr3	133996920	133997485	+	25.69	NA	Intergenic	ISAT_RN|Satellite|Satellite	409358	NM_001014049	311470	Rn.110539	NM_001014049	ENSRNOG00000004852	Sel1l2	RGD1311278	SEL1L2 ERAD E3 ligase adaptor subunit	protein-coding
MACS_peak_208	chr1	39967187	39967470	+	25.68	NA	Intergenic	L1_Rat1|LINE|L1	-119185	NM_001025000	308129	Rn.34836	NM_001025000	ENSRNOG00000016286	Iyd	RGD1309288	iodotyrosine deiodinase	protein-coding
MACS_peak_9315	chr7	61988561	61989095	+	25.66	NA	Intergenic	L1_Rn|LINE|L1	173623	NM_054004	117152	Rn.32934	NM_054004	ENSRNOG00000007834	Cand1	Tip120|Tip120A	cullin-associated and neddylation-dissociated 1	protein-coding
MACS_peak_1400	chr10	191046	191702	+	25.66	NA	Intergenic	RatSatRep2|Unknown|Unknown	163131	NM_133421	170946	Rn.27366	NM_133421	ENSRNOG00000056248	Marf1	Lkap	meiosis regulator and mRNA stability factor 1	protein-coding
MACS_peak_3935	chr16	66367303	66367771	+	25.66	NA	Intergenic	Intergenic	-680555	NM_001107319	306534	Rn.231130	NM_001107319	ENSRNOG00000011858	Unc5d	-	unc-5 netrin receptor D	protein-coding
MACS_peak_2444	chr13	18982790	18983084	+	25.62	NA	Intergenic	L1_Rat1|LINE|L1	-2695575	NM_001047873	301650	Rn.202933	NM_001047873	ENSRNOG00000032206	Cntnap5b	Caspr5-2|Caspr5-3|Cntnap5c|RGD1565194	contactin associated protein-like 5B	protein-coding
MACS_peak_3469	chr15	51116747	51117069	+	25.62	NA	Intergenic	L1_Rn|LINE|L1	51476	NM_001013996	306000	Rn.102664	NM_001013996	ENSRNOG00000015495	Slc25a37	Mscp|RGD1359361	solute carrier family 25 member 37	protein-coding
MACS_peak_8801	chr6	93818607	93818864	+	25.62	NA	Intergenic	L1_Rat2|LINE|L1	-256421	NR_075101	171139	Rn.8459	NM_133604	ENSRNOG00000008222	Timm9	Tim9|Tim9a|Timm9a	translocase of inner mitochondrial membrane 9	protein-coding
MACS_peak_5395	chr2	77652244	77652714	+	25.62	NA	Intergenic	L1_Rn|LINE|L1	-19853	NM_022300	64160	Rn.37779	NM_022300		Basp1	NAP22	brain abundant, membrane attached signal protein 1	protein-coding
MACS_peak_3829	chr16	41101395	41101869	+	25.62	NA	intron (NM_001170346, intron 1 of 10)	RatSatRep2|Unknown|Unknown	22188	NM_001170346	290729	Rn.84721	NM_001170346	ENSRNOG00000011688	Neil3	RGD1310562	nei-like DNA glycosylase 3	protein-coding
MACS_peak_1268	chr1	247769062	247769350	+	25.62	NA	Intergenic	L1_Rat1|LINE|L1	52522	NM_184050	373544	Rn.99609	NM_184050	ENSRNOG00000010915	Ermp1	Fxna	endoplasmic reticulum metallopeptidase 1	protein-coding
MACS_peak_7813	chr5	9675119	9675705	+	25.62	NA	Intergenic	RatSatRep2|Unknown|Unknown	-243069	NM_001079699	297784	Rn.228976	NM_001079699	ENSRNOG00000007240	Rrs1	-	ribosome biogenesis regulator homolog	protein-coding
MACS_peak_8294	chr5	146405865	146406141	+	25.6	NA	Intergenic	(TCCTCC)n|Simple_repeat|Simple_repeat	40224	NM_001109463	685271	Rn.172241	NM_001109463	ENSRNOG00000032889	Hmgb4	-	high-mobility group box 4	protein-coding
MACS_peak_5946	chr2	218307032	218307317	+	25.53	NA	Intergenic	RatSatRep2|Unknown|Unknown	343798	NM_145777	252920	Rn.27711	NM_145777	ENSRNOG00000017969	Olfm3	-	olfactomedin 3	protein-coding
MACS_peak_780	chr1	164295214	164295573	+	25.52	NA	Intergenic	(GTGGTG)n|Simple_repeat|Simple_repeat	12914	NM_017173	29345	Rn.98199	NM_017173	ENSRNOG00000016831	Serpinh1	Cbp2|Serpinh2	serpin family H member 1	protein-coding
MACS_peak_5682	chr2	152425714	152426249	+	25.52	NA	Intergenic	L1_Rn|LINE|L1	398566	NM_001107678	310461	Rn.2744	NM_001107678	ENSRNOG00000014599	Dhx36	-	DEAH-box helicase 36	protein-coding
MACS_peak_9392	chr7	82268667	82269062	+	25.5	NA	Intergenic	RNHAL1|LINE|L1	-69775	NM_001113785	362905	Rn.203197	NM_001113785		Emc2	RGD1310430|Ttc35	ER membrane protein complex subunit 2	protein-coding
MACS_peak_4091	chr17	15963663	15963957	+	25.49	NA	intron (NM_001191556, intron 1 of 26)	L1_Rn|LINE|L1	39762	NM_001191556	306811	Rn.30163	NM_001191556	ENSRNOG00000016684	Wnk2	RGD1307284	WNK lysine deficient protein kinase 2	protein-coding
MACS_peak_10840	chrX	43562980	43563961	+	25.49	NA	intron (NM_001013960, intron 5 of 14)	RatSatRep2|Unknown|Unknown	28730	NM_001013960	302640	Rn.8792	NM_001013960	ENSRNOG00000003782	Acot9	Acate2	acyl-CoA thioesterase 9	protein-coding
MACS_peak_5042	chr2	1841965	1842470	+	25.49	NA	Intergenic	L1_Rn|LINE|L1	-280753	NM_001033716	25403	Rn.17481	NM_053295	ENSRNOG00000010286	Cast	-	calpastatin	protein-coding
MACS_peak_10446	chr9	89263640	89264047	+	25.43	NA	Intergenic	RatSatRep2|Unknown|Unknown	-68570	NM_001127492	316561	Rn.15453	NM_001127492	ENSRNOG00000016388	Sphkap	RGD1311951|Skip	SPHK1 interactor, AKAP domain containing	protein-coding
MACS_peak_431	chr1	72971365	72971808	+	25.43	NA	intron (NM_001108468, intron 3 of 6)	RatSatRep2|Unknown|Unknown	15569	NM_001108468	361504	Rn.228894	NM_001108468	ENSRNOG00000027919	Rdh13	-	retinol dehydrogenase 13	protein-coding
MACS_peak_3102	chr14	72880775	72881253	+	25.43	NA	Intergenic	RatSatRep2|Unknown|Unknown	-8231	NM_022692	64633	Rn.44477	NM_022692		Rab5a	-	RAB5A, member RAS oncogene family	protein-coding
MACS_peak_4703	chr19	291211	291410	+	25.42	NA	Intergenic	Intergenic	-196400	NM_144743	246252	Rn.83638	NM_144743	ENSRNOG00000011330	Ces2a	Ces6	carboxylesterase 2A	protein-coding
MACS_peak_10151	chr9	9187299	9187534	+	25.4	NA	Intergenic	L1_Rn|LINE|L1	-44216	NM_001025755	367620	Rn.155021	NM_001025755	ENSRNOG00000033341	MGC116197	RGD1563862	similar to RIKEN cDNA 1700001E04	protein-coding
MACS_peak_3487	chr15	54510432	54510818	+	25.4	NA	intron (NM_001107278, intron 1 of 22)	L1_Rn|LINE|L1	17855	NM_001107278	306022		NM_001107278	ENSRNOG00000014478	Fndc3a	Fndc3	fibronectin type III domain containing 3a	protein-coding
MACS_peak_11482	chrY_KL568160v1_random	1845912	1846693	+	25.39	NA	NA	L1_Rn|LINE|L1	NA	NA
MACS_peak_8622	chr6	52015762	52016071	+	25.39	NA	Intergenic	L1_Rn|LINE|L1	-106169	NM_177928	297508	Rn.203508	NM_177928	ENSRNOG00000009754	Nampt	Pbef|Pbef1	nicotinamide phosphoribosyltransferase	protein-coding
MACS_peak_6315	chr20	40915342	40915770	+	25.37	NA	Intergenic	Intergenic	136534	NM_001005539	294422	Rn.8142	NM_001005539	ENSRNOG00000000815	Smpdl3a	-	sphingomyelin phosphodiesterase, acid-like 3A	protein-coding
MACS_peak_3171	chr14	89721503	89722064	+	25.37	NA	intron (NM_001106020, intron 47 of 62)	L1_Rn|LINE|L1	337271	NM_001106020	289797	Rn.214144	NM_001106020	ENSRNOG00000025645	Abca13	-	ATP binding cassette subfamily A member 13	protein-coding
MACS_peak_11464	chrY_KL568158v1_random	475498	475854	+	25.36	NA	NA	RatSatRep2|Unknown|Unknown	NA	NA
MACS_peak_2511	chr13	33591121	33591400	+	25.33	NA	Intergenic	SATI_RN|Satellite|Satellite	660390	NM_021762	60381	Rn.156195	NM_021762	ENSRNOG00000002319	Tsn	-	translin	protein-coding
MACS_peak_61	chr1	11943733	11944566	+	25.32	NA	Intergenic	BC1_Rn|scRNA|scRNA	-25942	NR_046238	100861534		NR_046238	ENSRNOG00000059852	Rn5-8s	-	5.8S ribosomal RNA	rRNA
MACS_peak_4211	chr17	46323663	46324240	+	25.31	NA	Intergenic	Intergenic	-208925	NM_001191940	498757	Rn.163362	NM_001191940	ENSRNOG00000054964	Aoah	RGD1560514	acyloxyacyl hydrolase	protein-coding
MACS_peak_6483	chr3	26885384	26885621	+	25.31	NA	intron (NM_001107843, intron 2 of 99)	(GAAGGA)n|Simple_repeat|Simple_repeat	462624	NM_001107843	311926	Rn.234597	NM_001107843		Lrp1b	-	LDL receptor related protein 1B	protein-coding
MACS_peak_6332	chr20	44325297	44325610	+	25.31	NA	Intergenic	Intergenic	-70389	NM_001170483	499461	Rn.141375	NM_001170483	ENSRNOG00000000597	Wisp3	RGD1564120	WNT1 inducible signaling pathway protein 3	protein-coding
MACS_peak_5678	chr2	151389677	151390018	+	25.31	NA	Intergenic	L1_Rat1|LINE|L1	75029	NM_012800	25265	Rn.10217	NM_012800	ENSRNOG00000014232	P2ry1	P2y|P2y1	purinergic receptor P2Y1	protein-coding
MACS_peak_6738	chr3	95302391	95302709	+	25.31	NA	intron (NM_001144862, intron 1 of 2)	RatSatRep2|Unknown|Unknown	70384	NM_001144862	691083	Rn.221906	NM_001144862	ENSRNOG00000013437	LOC691083	RGD1306990	hypothetical protein LOC691083	protein-coding
MACS_peak_10007	chr8	108326819	108327083	+	25.31	NA	Intergenic	(AGCATCCCGC)n|Simple_repeat|Simple_repeat	-217150	NM_001106850	300954	Rn.141574	NM_001106850	ENSRNOG00000022084	Sox14	-	SRY box 14	protein-coding
MACS_peak_11528	chrY_KL568162v1_random	1535415	1535638	+	25.3	NA	NA	(CTT)n|Simple_repeat|Simple_repeat	NA	NA
MACS_peak_7585	chr4	125613830	125614532	+	25.27	NA	Intergenic	RNHAL1|LINE|L1	685229	NM_001030045	500261	Rn.95239	NM_001030045	ENSRNOG00000022060	Magi1	BAP-1|Baiap1|MAGI-1	membrane associated guanylate kinase, WW and PDZ domain containing 1	protein-coding
MACS_peak_9389	chr7	82030862	82031228	+	25.26	NA	intron (NM_001130575, intron 1 of 3)	L1_Rn|LINE|L1	28614	NM_001130575	500863	Rn.225158	NM_001130575	ENSRNOG00000037687	Rspo2	RGD1562331	R-spondin 2	protein-coding
MACS_peak_11029	chrX	99024040	99024304	+	25.26	NA	Intergenic	RNHAL1|LINE|L1	1949462	NM_001106968	302776	Rn.218606	NM_001106968	ENSRNOG00000042823	RGD1561230	-	similar to RIKEN cDNA 4921511C20 gene	protein-coding
MACS_peak_4359	chr17	90654531	90654817	+	25.22	NA	Intergenic	L1_Rat1|LINE|L1	-36436	NM_001105978	289287	Rn.60453	NM_001105978	ENSRNOG00000002480	Gpr137b	Tm7sf1	G protein-coupled receptor 137B	protein-coding
MACS_peak_11282	chrY	1630848	1631502	+	25.22	NA	Intergenic	RatSatRep2|Unknown|Unknown	-227753	NM_001329902	103694559		NM_001329902	ENSRNOG00000058664	Usp9y	-	ubiquitin specific peptidase 9, Y-linked	protein-coding
MACS_peak_11244	chrX	155472783	155473156	+	25.17	NA	Intergenic	L1_Rn|LINE|L1	128793	NR_037380	100526600		NR_037380	ENSRNOG00000057982	Mir3585	rno-mir-3585	microRNA 3585	ncRNA
MACS_peak_7751	chr4	175274070	175274991	+	25.17	NA	Intergenic	RatSatRep2|Unknown|Unknown	-157374	NM_017337	50678	Rn.44403	NM_017337	ENSRNOG00000025042	Pde3a	RNPDE3A	phosphodiesterase 3A	protein-coding
MACS_peak_9735	chr8	30677580	30678288	+	25.17	NA	Intergenic	RatSatRep2|Unknown|Unknown	-198521	NM_017354	50864	Rn.10075	NM_017354	ENSRNOG00000023720	Ntm	Hnt|RNU16845	neurotrimin	protein-coding
MACS_peak_7089	chr4	23670181	23670495	+	25.13	NA	Intergenic	L1_Rn|LINE|L1	47709	NM_001077681	499993	Rn.141465	NM_001077681	ENSRNOG00000008594	Tex47	RGD1564345	testis expressed 47	protein-coding
MACS_peak_177	chr1	34239501	34240122	+	25.13	NA	Intergenic	RatSatRep2|Unknown|Unknown	328899	NM_001107331	306659	Rn.46018	NM_001107331	ENSRNOG00000033609	Irx1	-	iroquois homeobox 1	protein-coding
MACS_peak_8823	chr6	103355164	103355439	+	25.12	NA	Intergenic	RatSatRep2|Unknown|Unknown	-42227	NM_017172	29344	Rn.6142	NM_017172	ENSRNOG00000058646	Zfp36l1	Berg36|Brf1|ERF1|TIS11b|cMG1	zinc finger protein 36, C3H type-like 1	protein-coding
MACS_peak_9231	chr7	38501676	38502037	+	25.11	NA	Intergenic	RatSatRep2|Unknown|Unknown	-240394	NM_024129	29139	Rn.106103	NM_024129	ENSRNOG00000004554	Dcn	-	decorin	protein-coding
MACS_peak_9164	chr7	22389958	22390178	+	25.08	NA	Intergenic	L1VL4a|LINE|L1	553091	NM_001099484	503127	Rn.217634	NM_001099484		Vom2r56	RGD1559561	vomeronasal 2 receptor, 56	protein-coding
MACS_peak_459	chr1	79801752	79802322	+	25.08	NA	intron (NM_001106229, intron 5 of 13)	ZP3AR|Satellite|Satellite	11158	NM_053373	84387	Rn.2834	NM_053373	ENSRNOG00000013395	Pglyrp1	Pglyrp|Pgrp	peptidoglycan recognition protein 1	protein-coding
MACS_peak_7651	chr4	147116449	147116998	+	25.03	NA	intron (NM_001034020, intron 1 of 14)	L1_Rn|LINE|L1	46744	NM_001109393	680130	Rn.155651	NM_001109393	ENSRNOG00000007955	Timp4	Timp-4	TIMP metallopeptidase inhibitor 4	protein-coding
MACS_peak_11490	chrY_KL568161v1_random	702235	702873	+	25.03	NA	NA	RNHAL1|LINE|L1	NA	NA
MACS_peak_4063	chr17	10008051	10008382	+	25	NA	Intergenic	Intergenic	-3895	NM_001109904	25114	Rn.24104	NM_001109904	ENSRNOG00000016763	Fgfr4	-	fibroblast growth factor receptor 4	protein-coding
MACS_peak_2377	chr12	50992279	50992882	+	25	NA	Intergenic	RMER12C|LTR|ERVK	257650	NM_001191928	498194	Rn.16035	NM_001191928	ENSRNOG00000027489	Mn1	RGD1565571	MN1 proto-oncogene, transcriptional regulator	protein-coding
MACS_peak_6736	chr3	95053005	95053571	+	25	NA	Intergenic	RatSatRep2|Unknown|Unknown	-45598	NM_001168523	295975	Rn.3390	NM_001168523	ENSRNOG00000012738	Eif3m	RGD1565840	eukaryotic translation initiation factor 3, subunit M	protein-coding
MACS_peak_7268	chr4	54899229	54899500	+	25	NA	intron (NM_022202, intron 5 of 9)	L1_Rat1|LINE|L1	283101	NR_032747	100314270		NR_032747	ENSRNOG00000036461	Mir592	rno-mir-592	microRNA 592	ncRNA
MACS_peak_10622	chrUn_KL568475v1	2337	2905	+	25	NA	NA	RNHAL1|LINE|L1	NA	NA
MACS_peak_8515	chr6	30077084	30077322	+	24.97	NA	intron (NM_001014074, intron 2 of 8)	L1_Rn|LINE|L1	2791	NM_001014074	313936	Rn.140455	NM_001014074	ENSRNOG00000050114	Fam228a	-	family with sequence similarity 228, member A	protein-coding
MACS_peak_9972	chr8	98688617	98688847	+	24.97	NA	Intergenic	RatSatRep2|Unknown|Unknown	49465	NM_022677	64618	Rn.161923	NM_022677	ENSRNOG00000014644	Zic1	-	Zic family member 1	protein-coding
MACS_peak_7930	chr5	40672432	40672763	+	24.97	NA	Intergenic	RatSatRep2|Unknown|Unknown	188037	NM_080785	140808	Rn.10855	NM_080785	ENSRNOG00000008626	Manea	Enman	mannosidase, endo-alpha	protein-coding
MACS_peak_10471	chr9	98050671	98050889	+	24.96	NA	Intergenic	CpG	-22258	NM_001012135	316620	Rn.124575	NM_001012135	ENSRNOG00000019763	Mlph	-	melanophilin	protein-coding
MACS_peak_8293	chr5	146405063	146405662	+	24.96	NA	Intergenic	(TCCTCC)n|Simple_repeat|Simple_repeat	40865	NM_001109463	685271	Rn.172241	NM_001109463	ENSRNOG00000032889	Hmgb4	-	high-mobility group box 4	protein-coding
MACS_peak_10736	chrX	22680943	22681642	+	24.96	NA	Intergenic	RNHAL1|LINE|L1	-262419	NM_022255	64021	Rn.53986	NM_022255		Gpr173	Sreb3	G-protein coupled receptor 173	protein-coding
MACS_peak_1413	chr10	2987102	2987457	+	24.96	NA	Intergenic	RatSatRep2|Unknown|Unknown	-192067	NM_001135846	304714	Rn.159763	NM_001135846	ENSRNOG00000003326	Rrn3	RGD1305001	RRN3 homolog, RNA polymerase I transcription factor	protein-coding
MACS_peak_3263	chr14	113193684	113194357	+	24.9	NA	Intergenic	RatSatRep2|Unknown|Unknown	-8425	NM_001012039	305604	Rn.163265	NM_001012039	ENSRNOG00000003553	Efemp1	T16	EGF containing fibulin extracellular matrix protein 1	protein-coding
MACS_peak_2172	chr12	3352912	3353650	+	24.89	NA	Intergenic	SATI_RN|Satellite|Satellite	-527048	NM_001170397	288378	Rn.138846	NM_001170397	ENSRNOG00000029881	Clec4m	Cd209b	C-type lectin domain family 4 member M	protein-coding
MACS_peak_1987	chr11	49907601	49908223	+	24.88	NA	Intergenic	L1_Rn|LINE|L1	-198806	NM_001329881	498072	Rn.2874	NM_001329881	ENSRNOG00000033321	Hmgb2l1	HMG2|RGD1564519	high mobility group box 2-like 1	protein-coding
MACS_peak_9586	chr7	134396149	134396502	+	24.84	NA	Intergenic	L1_Rat1|LINE|L1	99510	NM_001100887	300173	Rn.14826	NM_001100887	ENSRNOG00000005234	Gxylt1	Glt8d3	glucoside xylosyltransferase 1	protein-coding
MACS_peak_608	chr1	115337937	115338322	+	24.84	NA	Intergenic	RNHAL1|LINE|L1	-635214	NM_001141935	365266	Rn.208837	NM_001141935	ENSRNOG00000056228	Atp10a	-	ATPase phospholipid transporting 10A (putative)	protein-coding
MACS_peak_2790	chr14	1690272	1691164	+	24.84	NA	Intergenic	RatSatRep2|Unknown|Unknown	-58340	NM_001011914	289881	Rn.6666	NM_001011914	ENSRNOG00000048308	Dr1	-	down-regulator of transcription 1, TBP-binding (negative cofactor 2)	protein-coding
MACS_peak_4455	chr18	25710854	25711209	+	24.84	NA	Intergenic	L1_Rn|LINE|L1	-38073	NM_012727	25050	Rn.11046	NM_012727	ENSRNOG00000020478	Camk4	Ccdpk|RATCCDPK	calcium/calmodulin-dependent protein kinase IV	protein-coding
MACS_peak_235	chr1	47580527	47581093	+	24.84	NA	Intergenic	RNHAL1|LINE|L1	-45289	NM_001038615	308099	Rn.20633	NM_001038615	ENSRNOG00000030210	Fndc1	-	fibronectin type III domain containing 1	protein-coding
MACS_peak_6768	chr3	102594666	102594878	+	24.82	NA	Intergenic	LSU-rRNA_Hsa|rRNA|rRNA	15326	NM_001000368	296005	Rn.142769	NM_001000368	ENSRNOG00000050411	Olr754	-	olfactory receptor 754	protein-coding
MACS_peak_8857	chr6	113417438	113417961	+	24.82	NA	intron (NM_053817, intron 16 of 22)	Lx4B|LINE|L1	1071744	NM_031720	65162	Rn.88380	NM_022688		Dio2	5DII|DIOII	iodothyronine deiodinase 2	protein-coding
MACS_peak_6009	chr2	236796272	236796774	+	24.82	NA	Intergenic	L1_Rn|LINE|L1	190828	NM_001106471	295443	Rn.3507	NM_001106471	ENSRNOG00000011311	Papss1	-	3'-phosphoadenosine 5'-phosphosulfate synthase 1	protein-coding
MACS_peak_580	chr1	107740728	107740982	+	24.8	NA	Intergenic	L1_Rn|LINE|L1	-355598	NM_001195599	499158	Rn.52198	NM_001195599	ENSRNOG00000049297	Ccdc179	RGD1559980	coiled-coil domain containing 179	protein-coding
MACS_peak_10243	chr9	35920426	35920887	+	24.8	NA	Intergenic	RatSatRep2|Unknown|Unknown	1223359	NM_001108791	363210	Rn.21075	NM_001108791	ENSRNOG00000011756	Phf3	-	PHD finger protein 3	protein-coding
MACS_peak_7505	chr4	102836987	102837640	+	24.8	NA	Intergenic	L1_Rn|LINE|L1	-1443984	NM_001109242	500204	Rn.46644	NM_001109242	ENSRNOG00000024604	RGD1562515	-	similar to RIKEN cDNA 4931417E11	protein-coding
MACS_peak_5356	chr2	70173767	70174053	+	24.8	NA	Intergenic	RatSatRep2|Unknown|Unknown	758516	NM_001168631	29181	Rn.83592	NM_001168631	ENSRNOG00000009771	Cdh10	-	cadherin 10	protein-coding
MACS_peak_10440	chr9	88865289	88865547	+	24.8	NA	Intergenic	L1_Rn|LINE|L1	-37006	NM_001108228	316559	Rn.218520	NM_001108228	ENSRNOG00000057256	Slc19a3	-	solute carrier family 19 member 3	protein-coding
MACS_peak_10700	chrX	13843930	13844286	+	24.8	NA	Intergenic	L1_Rn|LINE|L1	-145293	NM_001134598	367734	Rn.112507	NM_001134598	ENSRNOG00000021452	Hypm	RGD1563155	huntingtin interacting protein M	protein-coding
MACS_peak_3571	chr15	75987074	75987444	+	24.8	NA	Intergenic	RatSatRep2|Unknown|Unknown	1749516	NM_001191688	306091	Rn.232343	NM_001191688		Pcdh9	-	protocadherin 9	protein-coding
MACS_peak_6783	chr3	108949535	108950060	+	24.8	NA	Intergenic	RatSatRep2|Unknown|Unknown	85335	NR_032290	100314115		NR_032290	ENSRNOG00000040429	Mir674	rno-mir-674	microRNA 674	ncRNA
MACS_peak_4002	chr16	82841633	82841923	+	24.8	NA	Intergenic	RatSatRep2|Unknown|Unknown	158049	NM_001017508	498664	Rn.195390	NM_001017508	ENSRNOG00000033585	Tex29	-	testis expressed 29	protein-coding
MACS_peak_3303	chr15	7516312	7516642	+	24.8	NA	intron (NM_001108371, intron 1 of 3)	L1_Rn|LINE|L1	114230	NM_001108371	361013	Rn.15203	NM_001108371		Ube2e2	-	ubiquitin-conjugating enzyme E2E 2	protein-coding
MACS_peak_3010	chr14	46687772	46688239	+	24.8	NA	TTS (NR_046238).5	TTS (NR_046238).5	1022	NR_046238	100861534		NR_046238	ENSRNOG00000059852	Rn5-8s	-	5.8S ribosomal RNA	rRNA
MACS_peak_5701	chr2	155952129	155952546	+	24.7	NA	intron (NM_017303, intron 7 of 13)	L1_Rn|LINE|L1	71516	NM_031120	81784	Rn.3264	NM_031120		Ssr3	-	signal sequence receptor subunit 3	protein-coding
MACS_peak_3707	chr16	13183288	13183660	+	24.7	NA	Intergenic	L1_Rn|LINE|L1	-989356	NM_001113787	498591	Rn.122857	NM_001113787	ENSRNOG00000045563	RGD1559804	-	similar to hypothetical protein 4930474N05	protein-coding
MACS_peak_8146	chr5	103871090	103871421	+	24.7	NA	Intergenic	RNHAL1|LINE|L1	391488	NM_053935	116743	Rn.10787	NM_053935	ENSRNOG00000006761	Sh3gl2	Sh3d2a|Sh3p4	SH3 domain containing GRB2 like 2, endophilin A1	protein-coding
MACS_peak_1543	chr10	43968306	43968672	+	24.7	NA	Intergenic	L1_Rn|LINE|L1	-20995	NM_001000009	287314	Rn.142151	NM_001000009	ENSRNOG00000046967	Olr1416	ratchr10-44162573-44161644_ORF	olfactory receptor 1416	protein-coding
MACS_peak_3944	chr16	70037170	70037530	+	24.6	NA	Intergenic	RatSatRep2|Unknown|Unknown	-138275	NM_012928	25411	Rn.10384	NM_012928		Cnga2	Cncg4|OLFCH	cyclic nucleotide gated channel alpha 2	protein-coding
MACS_peak_2501	chr13	33486002	33486363	+	24.54	NA	Intergenic	SATI_RN|Satellite|Satellite	765468	NM_021762	60381	Rn.156195	NM_021762	ENSRNOG00000002319	Tsn	-	translin	protein-coding
MACS_peak_9039	chr7	5011880	5012156	+	24.51	NA	Intergenic	L1_Rn|LINE|L1	94690	NM_001000060	288816	Rn.143400	NM_001000060	ENSRNOG00000029961	Olr892	-	olfactory receptor 892	protein-coding
MACS_peak_2391	chr13	1654742	1655403	+	24.51	NA	Intergenic	L1_Rn|LINE|L1	293491	NM_001305281	297865		NM_001305281	ENSRNOG00000032307	Dsel	RGD1307724	dermatan sulfate epimerase-like	protein-coding
MACS_peak_5628	chr2	138556110	138556382	+	24.49	NA	Intergenic	L1_Rat1|LINE|L1	277619	NM_001100524	295027	Rn.61115	NM_001100524	ENSRNOG00000009949	Pcdh18	-	protocadherin 18	protein-coding
MACS_peak_11532	chrY_KL568162v1_random	2317829	2318149	+	24.48	NA	NA	RatSatRep2|Unknown|Unknown	NA	NA
MACS_peak_2609	chr13	59007408	59007690	+	24.48	NA	Intergenic	RatSatRep2|Unknown|Unknown	-1428397	NM_001109492	686081	Rn.164870	NM_001109492	ENSRNOG00000003251	B3galt2	-	Beta-1,3-galactosyltransferase 2	protein-coding
MACS_peak_10870	chrX	48095834	48096168	+	24.48	NA	Intergenic	L1_Rn|LINE|L1	-683109	NM_001109317	501569	Rn.16447	NM_001109317	ENSRNOG00000030418	Tmem47	RGD1564799	transmembrane protein 47	protein-coding
MACS_peak_5351	chr2	69703549	69703767	+	24.48	NA	Intergenic	L1_Rn|LINE|L1	288264	NM_001168631	29181	Rn.83592	NM_001168631	ENSRNOG00000009771	Cdh10	-	cadherin 10	protein-coding
MACS_peak_8230	chr5	125523429	125523811	+	24.48	NA	Intergenic	L1_Rn|LINE|L1	-373105	NM_001271206	313427	Rn.74199	NM_001271206	ENSRNOG00000005802	Usp24	-	ubiquitin specific peptidase 24	protein-coding
MACS_peak_3608	chr15	88776540	88777028	+	24.46	NA	Intergenic	L1_Rn|LINE|L1	-106459	NM_001108389	361088	Rn.154151	NM_001108389	ENSRNOG00000009690	Rnf219	RGD1564706	ring finger protein 219	protein-coding
MACS_peak_9688	chr8	17382573	17383237	+	24.46	NA	Intergenic	RNHAL1|LINE|L1	-38647	NM_001108128	315447	Rn.6136	NM_001108128	ENSRNOG00000026643	Chordc1	CHP-1	cysteine and histidine rich domain containing 1	protein-coding
MACS_peak_6381	chr3	596412	596892	+	24.43	NA	Intergenic	RatSatRep2|Unknown|Unknown	-135001	NM_001134447	296532	Rn.198620	NM_001134447	ENSRNOG00000005070	Spopl	RGD1305847	speckle type BTB/POZ protein like	protein-coding
MACS_peak_2985	chr14	46634927	46635562	+	24.43	NA	intron (NM_147136, intron 1 of 5)	CpG	-1686	NM_001025002	310926		NM_001025002		LOC310926	Aa1011|Aa1262|Ab2-057|Ac1147	hypothetical protein LOC310926	protein-coding
MACS_peak_11566	chrY_KL568162v1_random	10616548	10617068	+	24.42	NA	NA	(AGA)n|Simple_repeat|Simple_repeat	NA	NA
MACS_peak_4167	chr17	38802728	38802998	+	24.42	NA	Intergenic	L1_Rat1|LINE|L1	55528	NM_001044271	502122	Rn.194900	NM_001044271	ENSRNOG00000039058	Prl2c1	Ghd4|RGD1562878	Prolactin family 2, subfamily c, member 1	protein-coding
MACS_peak_2863	chr14	22707031	22707277	+	24.4	NA	intron (NM_022228, intron 9 of 12)	intron (NM_022228, intron 9 of 12)	-17245	NM_173295	286954	Rn.9969	NM_173295	ENSRNOG00000001990	Ugt2b1	2B1|Udpgtr2|Ugt2b17	UDP glucuronosyltransferase 2 family, polypeptide B1	protein-coding
MACS_peak_1309	chr1	255429378	255429746	+	24.4	NA	Intergenic	RatSatRep2|Unknown|Unknown	-49699	NM_001107607	309512	Rn.75288	NM_001107607	ENSRNOG00000059776	Tnks2	-	tankyrase 2	protein-coding
MACS_peak_2966	chr14	46600458	46601106	+	24.39	NA	intron (NM_147136, intron 1 of 5)	RNLTR3-int|LTR|ERVK	-36148	NM_001025002	310926		NM_001025002		LOC310926	Aa1011|Aa1262|Ab2-057|Ac1147	hypothetical protein LOC310926	protein-coding
MACS_peak_11350	chrY_KL568147v1_random	146293	147099	+	24.38	NA	NA	RatSatRep2|Unknown|Unknown	NA	NA
MACS_peak_7281	chr4	55641491	55641851	+	24.38	NA	Intergenic	RatSatRep2|Unknown|Unknown	-74073	NM_024149	79117	Rn.28244	NM_024149	ENSRNOG00000007806	Arf5	-	ADP-ribosylation factor 5	protein-coding
MACS_peak_10938	chrX	66266795	66267239	+	24.38	NA	Intergenic	L1_Rn|LINE|L1	-47399	NM_001106583	296867	Rn.218317	NM_001106583	ENSRNOG00000021547	Pgr15l	RGD1562685	G protein-coupled receptor 15-like	protein-coding
MACS_peak_10241	chr9	34114051	34114461	+	24.38	NA	Intergenic	L1_Rn|LINE|L1	-2092158	NM_001106898	301309	Rn.204758	NM_001106898	ENSRNOG00000012045	Adgrb3	Bai3	adhesion G protein-coupled receptor B3	protein-coding
MACS_peak_6559	chr3	52061653	52062286	+	24.36	NA	intron (NM_001271225, intron 4 of 7)	intron (NM_001271225, intron 4 of 7)	137342	NM_001015032	366061	Rn.78014	NM_001015032	ENSRNOG00000005727	Galnt3	-	polypeptide N-acetylgalactosaminyltransferase 3	protein-coding
MACS_peak_8636	chr6	56276346	56276589	+	24.31	NA	Intergenic	L1_Rat1|LINE|L1	-349301	NM_017149	29279	Rn.34890	NM_017149	ENSRNOG00000006588	Meox2	-	mesenchyme homeobox 2	protein-coding
MACS_peak_7849	chr5	17984334	17984941	+	24.27	NA	Intergenic	RatSatRep2|Unknown|Unknown	-320910	NM_001008772	312952	Rn.65720	NM_001008772	ENSRNOG00000046647	Impad1	IMP 3|RGD1306455|gPAPP	inositol monophosphatase domain containing 1	protein-coding
MACS_peak_11551	chrY_KL568162v1_random	6531169	6531625	+	24.25	NA	NA	RatSatRep2|Unknown|Unknown	NA	NA
MACS_peak_8856	chr6	113101174	113102182	+	24.24	NA	intron (NM_053817, intron 16 of 22)	RatSatRep2|Unknown|Unknown	968474	NM_053817	116508	Rn.10926	NM_053817	ENSRNOG00000047574	Nrxn3	-	neurexin 3	protein-coding
MACS_peak_11221	chrX	151137522	151138256	+	24.22	NA	Intergenic	RatSatRep2|Unknown|Unknown	34313	NM_001107587	309349	Rn.106231	NM_001107587	ENSRNOG00000011562	Slitrk2	RGD1561361	SLIT and NTRK-like family, member 2	protein-coding
MACS_peak_11467	chrY_KL568158v1_random	699897	700261	+	24.22	NA	NA	L1_Rn|LINE|L1	NA	NA
MACS_peak_5855	chr2	195044023	195044408	+	24.22	NA	Intergenic	L1_Rn|LINE|L1	379451	NM_001329893	103689947	Rn.16617	NM_001329893	ENSRNOG00000047158	LOC103689947	rSBP	selenium-binding protein 1	protein-coding
MACS_peak_5609	chr2	133574133	133574399	+	24.21	NA	Intergenic	L1_Rn|LINE|L1	-2916064	NM_001106429	295010	Rn.218503	NM_001106429	ENSRNOG00000029749	Pabpc4l	RGD1559517	poly(A) binding protein, cytoplasmic 4-like	protein-coding
MACS_peak_2955	chr14	46552905	46553229	+	24.18	NA	Intergenic	(TCCCC)n|Simple_repeat|Simple_repeat	-83863	NM_001025002	310926		NM_001025002		LOC310926	Aa1011|Aa1262|Ab2-057|Ac1147	hypothetical protein LOC310926	protein-coding
MACS_peak_6476	chr3	25589662	25590365	+	24.14	NA	intron (NM_001107843, intron 43 of 99)	L1_Rn|LINE|L1	1758113	NM_001107843	311926	Rn.234597	NM_001107843		Lrp1b	-	LDL receptor related protein 1B	protein-coding
MACS_peak_7363	chr4	75929221	75929507	+	24.12	NA	Intergenic	L1_Rn|LINE|L1	-1282450	NM_001108627	362356	Rn.68078	NM_001108627	ENSRNOG00000005310	Cul1	-	cullin 1	protein-coding
MACS_peak_10783	chrX	33319464	33319863	+	24.12	NA	Intergenic	RatSatRep2|Unknown|Unknown	-123523	NM_012521	24249	Rn.9974	NM_012521	ENSRNOG00000004222	S100g	Cabp|Calb3|Cbpi|Rncalbd9	S100 calcium binding protein G	protein-coding
MACS_peak_10395	chr9	76880386	76880592	+	24.12	NA	Intergenic	RatSatRep2|Unknown|Unknown	-111683	NM_001106916	301476	Rn.229574	NM_001106916	ENSRNOG00000027430	Ikzf2	Zfpn1a2	IKAROS family zinc finger 2	protein-coding
MACS_peak_2091	chr11	79767304	79767563	+	24.12	NA	Intergenic	Intergenic	-60295	NR_132630	106455137	Rn.19747	NR_132630		Lppos	-	LIM domain containing preferred translocation partner in lipoma, opposite strand	ncRNA
MACS_peak_2563	chr13	42425522	42426314	+	24.07	NA	Intergenic	L1_Rn|LINE|L1	-162894	NM_001007727	360838	Rn.231867	NM_001007727	ENSRNOG00000003453	Lypd1	Lypdc1	Ly6/Plaur domain containing 1	protein-coding
MACS_peak_9584	chr7	133218945	133219228	+	24.04	NA	Intergenic	RatSatRep2|Unknown|Unknown	170359	NM_001004449	446171	Rn.81962	NM_001004449	ENSRNOG00000037025	Smgc	-	submandibular gland protein C	protein-coding
MACS_peak_6680	chr3	83511582	83512156	+	24.04	NA	Intergenic	L1_Rn|LINE|L1	-175909	NM_001127379	362170	Rn.103083	NM_001127379	ENSRNOG00000009689	Api5	-	apoptosis inhibitor 5	protein-coding
MACS_peak_1837	chr11	6592060	6592893	+	24.04	NA	Intergenic	RatSatRep2|Unknown|Unknown	-617693	NM_001100502	288333	Rn.29938	NM_001100502		Gbe1	-	1,4-alpha-glucan branching enzyme 1	protein-coding
MACS_peak_8046	chr5	71466137	71466802	+	24.03	NA	Intergenic	RatSatRep2|Unknown|Unknown	-637235	NM_001025275	298012	Rn.67042	NM_001025275	ENSRNOG00000016137	Rad23b	-	RAD23 homolog B, nucleotide excision repair protein	protein-coding
MACS_peak_6363	chr20	53208875	53209363	+	24.02	NA	Intergenic	RNHAL1|LINE|L1	1308572	NM_019309	54257	Rn.87696	NM_019309	ENSRNOG00000000368	Grik2	GluK2|GluR6	glutamate ionotropic receptor kainate type subunit 2	protein-coding
MACS_peak_4369	chr18	1450768	1451470	+	24.01	NA	Intergenic	RatSatRep2|Unknown|Unknown	-53059	NM_031105	81769	Rn.112597	NM_031105	ENSRNOG00000031022	Rpl36al	-	ribosomal protein L36a-like	protein-coding
MACS_peak_10205	chr9	20437246	20437538	+	24.01	NA	Intergenic	(AAGAAG)n|Simple_repeat|Simple_repeat	157753	NM_001198725	100362005	Rn.1223	NM_001198725	ENSRNOG00000025810	Grcc10	-	gene rich cluster, C10 gene	protein-coding
MACS_peak_1641	chr10	69257993	69258250	+	24.01	NA	intron (NM_001034014, intron 1 of 8)	L1_Rn|LINE|L1	89102	NM_001034014	25364	Rn.37523	NM_012892	ENSRNOG00000058308	Asic2	Accn1|BNC1k|BNaC1|MDEG|MDEG1|MDEG2	acid sensing ion channel subunit 2	protein-coding
MACS_peak_6078	chr2	260380868	260381181	+	24.01	NA	intron (NM_019123, intron 2 of 10)	RatSatRep2|Unknown|Unknown	-63203	NM_001134594	365962	Rn.139574	NM_001134594	ENSRNOG00000042332	Slc44a5	RGD1564620	solute carrier family 44, member 5	protein-coding
MACS_peak_3850	chr16	45140349	45140589	+	24.01	NA	Intergenic	L1_Rn|LINE|L1	-1283400	NM_001169133	306451		NM_001169133	ENSRNOG00000012802	Tenm3	Odz3	teneurin transmembrane protein 3	protein-coding
MACS_peak_5699	chr2	155517492	155517754	+	24.01	NA	Intergenic	L1_Rn|LINE|L1	-135784	NM_001099506	365807	Rn.111884	NM_001099506	ENSRNOG00000028345	Vom2r47	-	vomeronasal 2 receptor, 47	protein-coding
MACS_peak_1764	chr10	101621756	101622014	+	24.01	NA	Intergenic	L1_Rat2|LINE|L1	74453	NR_031941	100314063		NR_031941	ENSRNOG00000036251	Mir297	rno-mir-297	microRNA 297	ncRNA
MACS_peak_6347	chr20	49610174	49610488	+	24.01	NA	Intergenic	L1_Rn|LINE|L1	-123786	NM_001107639	309871	Rn.8012	NM_001107639	ENSRNOG00000000323	Prdm1	-	PR/SET domain 1	protein-coding
MACS_peak_3890	chr16	54945094	54945705	+	24	NA	intron (NM_145096, intron 10 of 13)	L1_Rn|LINE|L1	45947	NM_001107313	306492	Rn.101873	NM_001107313	ENSRNOG00000012263	Cnot7	-	CCR4-NOT transcription complex, subunit 7	protein-coding
MACS_peak_2499	chr13	33480924	33481450	+	23.97	NA	Intergenic	SATI_RN|Satellite|Satellite	770463	NM_021762	60381	Rn.156195	NM_021762	ENSRNOG00000002319	Tsn	-	translin	protein-coding
MACS_peak_888	chr1	180755940	180756497	+	23.96	NA	Intergenic	ISAT_RN|Satellite|Satellite	-1745961	NM_001013434	365355	Rn.3271	NM_001013434	ENSRNOG00000012258	Rras2	-	RAS related 2	protein-coding
MACS_peak_2709	chr13	89439275	89439825	+	23.93	NA	Intergenic	tRNA-Glu-GAG_|tRNA|tRNA	-40508	NM_001109075	498278	Rn.7902	NM_001109075	ENSRNOG00000034221	Cfap126	RGD1562658	cilia and flagella associated protein 126	protein-coding
MACS_peak_9352	chr7	72446398	72446614	+	23.91	NA	Intergenic	RNHAL1|LINE|L1	-325934	NM_133398	170910	Rn.6864	NM_133398	ENSRNOG00000006870	Mtdh	Lyric	metadherin	protein-coding
MACS_peak_4733	chr19	7039571	7039793	+	23.9	NA	Intergenic	RatSatRep2|Unknown|Unknown	1007747	NM_053393	84408	Rn.214220	NM_053393	ENSRNOG00000056643	Cdh8	-	cadherin 8	protein-coding
MACS_peak_2968	chr14	46603077	46603731	+	23.9	NA	intron (NM_147136, intron 1 of 5)	B1_Mur3|SINE|Alu	-33526	NM_001025002	310926		NM_001025002		LOC310926	Aa1011|Aa1262|Ab2-057|Ac1147	hypothetical protein LOC310926	protein-coding
MACS_peak_5271	chr2	50813216	50813439	+	23.87	NA	Intergenic	RatSatRep2|Unknown|Unknown	236076	NM_001106412	294767	Rn.9312	NM_001106412	ENSRNOG00000012136	Mrps30	-	mitochondrial ribosomal protein S30	protein-coding
MACS_peak_160	chr1	27226453	27226672	+	23.87	NA	Intergenic	L1_Rn|LINE|L1	-1075398	NM_001106204	292188	Rn.9080	NM_001106204		Rnf217	Ibrdc1	ring finger protein 217	protein-coding
MACS_peak_10381	chr9	71988939	71989517	+	23.87	NA	Intergenic	L1_Rn|LINE|L1	-63738	NM_031089	81753	Rn.10601	NM_031089	ENSRNOG00000015259	Pth2r	Pthr2	parathyroid hormone 2 receptor	protein-coding
MACS_peak_4158	chr17	37136241	37136902	+	23.87	NA	Intergenic	RNHAL1|LINE|L1	364932	NM_001191915	117097	Rn.230449	NM_001191915	ENSRNOG00000011335	Gpr50	H9	G protein-coupled receptor 50	protein-coding
MACS_peak_3735	chr16	19991009	19991250	+	23.87	NA	Intergenic	L1_Rn|LINE|L1	5587	NM_001271341	306342	Rn.48965	NM_001107302	ENSRNOG00000042658	Nxnl1	Txnl6	nucleoredoxin-like 1	protein-coding
MACS_peak_2979	chr14	46621189	46622151	+	23.85	NA	intron (NM_147136, intron 1 of 5)	intron (NM_147136, intron 1 of 5)	-15260	NM_001025002	310926		NM_001025002		LOC310926	Aa1011|Aa1262|Ab2-057|Ac1147	hypothetical protein LOC310926	protein-coding
MACS_peak_336	chr1	56053969	56054436	+	23.83	NA	Intergenic	Intergenic	114149	NM_001107464	308212	Rn.100050	NM_001107464	ENSRNOG00000022921	Dact2	-	dishevelled-binding antagonist of beta-catenin 2	protein-coding
MACS_peak_7979	chr5	55621391	55621645	+	23.81	NA	Intergenic	L1_Rat1|LINE|L1	-803558	NM_017321	50655	Rn.35934	NM_017321	ENSRNOG00000005849	Aco1	AH|Acon1|IRP1	aconitase 1	protein-coding
MACS_peak_859	chr1	178243751	178244347	+	23.79	NA	Intergenic	L1_Rn|LINE|L1	-25288	NM_017044	24694	Rn.9768	NM_017044	ENSRNOG00000014318	Pth	PTH-(1-84)|Pth1|Pthr1	parathyroid hormone	protein-coding
MACS_peak_3713	chr16	14869178	14869600	+	23.79	NA	Intergenic	L1_Rn|LINE|L1	242196	NM_001115040	683469	Rn.219079	NM_001115040	ENSRNOG00000039601	LOC683469	-	similar to RNA polymerase II transcription factor SIII subunit A2 (Elongin A2) (EloA2) (Transcription elongation factor B polypeptide 3B)	protein-coding
MACS_peak_2778	chr13_KL568051v1_random	23396	23678	+	23.79	NA	NA	CpG	NA	NA
MACS_peak_2116	chr11	85570859	85571163	+	23.77	NA	Intergenic	RatSatRep2|Unknown|Unknown	172032	NM_001000041	287968	Rn.142226	NM_001000041		Olr1570	ratchr11-83815769-83816710_ORF	olfactory receptor 1570	protein-coding
MACS_peak_7086	chr4	22244172	22244562	+	23.77	NA	intron (NM_012623, intron 22 of 27)	L1_Rat1|LINE|L1	-51895	NM_012690	24891	Rn.82691	NM_012690	ENSRNOG00000008012	Abcb4	Mdr2|Pgy3	ATP binding cassette subfamily B member 4	protein-coding
MACS_peak_11049	chrX	104637681	104638793	+	23.77	NA	Intergenic	RatSatRep2|Unknown|Unknown	-46439	NM_022290	64104	Rn.26691	NM_022290	ENSRNOG00000060970	Tnmd	ChM1L	tenomodulin	protein-coding
MACS_peak_101	chr1	19538648	19538868	+	23.77	NA	Intergenic	L1_Rn|LINE|L1	-162457	NM_001170575	293947	Rn.106138	NM_001106354	ENSRNOG00000011245	Arhgap18	-	Rho GTPase activating protein 18	protein-coding
MACS_peak_9477	chr7	105518372	105518826	+	23.76	NA	intron (NM_017142, intron 2 of 17)	RatSatRep2|Unknown|Unknown	74205	NM_017142	29241	Rn.10382	NM_017142	ENSRNOG00000004890	Adcy8	Ac8	adenylate cyclase 8	protein-coding
MACS_peak_1610	chr10	60667390	60667810	+	23.76	NA	intron (NM_001000942, intron 1 of 1)	RatSatRep2|Unknown|Unknown	17969	NM_001000942	405281	Rn.142083	NM_001000942		Olr1500	-	olfactory receptor 1500	protein-coding
MACS_peak_7137	chr4	29649111	29649406	+	23.76	NA	Intergenic	Intergenic	119404	NM_053356	84352	Rn.107239	NM_053356	ENSRNOG00000011292	Col1a2	-	collagen type I alpha 2 chain	protein-coding
MACS_peak_6608	chr3	70058309	70058588	+	23.75	NA	Intergenic	RatSatRep2|Unknown|Unknown	-962086	NM_001010963	362154	Rn.129005	NM_001010963	ENSRNOG00000005256	Zc3h15	-	zinc finger CCCH-type containing 15	protein-coding
MACS_peak_6296	chr20	35733506	35733910	+	23.74	NA	Intergenic	RNHAL1|LINE|L1	-284428	NM_001033656	294410	Rn.3576	NM_001033656	ENSRNOG00000000800	Man1a1	Aa2-166|Man1a	mannosidase, alpha, class 1A, member 1	protein-coding
MACS_peak_5297	chr2	55467448	55467707	+	23.74	NA	Intergenic	RatSatRep2|Unknown|Unknown	-279779	NM_024159	79128	Rn.161784	NM_024159	ENSRNOG00000028930	Dab2	Doc-2|Doc2	DAB2, clathrin adaptor protein	protein-coding
MACS_peak_2025	chr11	56184021	56184273	+	23.69	NA	Intergenic	L1_Rn|LINE|L1	686913	NM_001000771	405046	Rn.142123	NM_001000771	ENSRNOG00000045676	Olr1455	-	olfactory receptor 1455	protein-coding
MACS_peak_7388	chr4	78648656	78649213	+	23.69	NA	Intergenic	RatSatRep2|Unknown|Unknown	9262	NM_199095	297081	Rn.56148	NM_199095	ENSRNOG00000008714	Svs1	-	seminal vesicle secretory protein 1	protein-coding
MACS_peak_2636	chr13	66000687	66001133	+	23.69	NA	Intergenic	RatSatRep2|Unknown|Unknown	450237	NM_001109538	689412	Rn.1279	NM_001109538	ENSRNOG00000027254	LOC689412	-	similar to CG4025-PA	protein-coding
MACS_peak_12	chr1	4044473	4045179	+	23.66	NA	Intergenic	L1_Rn|LINE|L1	-33315	NM_030843	81022	Rn.96029	NM_030843	ENSRNOG00000013351	Stxbp5	-	syntaxin binding protein 5	protein-coding
MACS_peak_4321	chr17	80976313	80977410	+	23.65	NA	intron (NM_213624, intron 1 of 4)	RatSatRep2|Unknown|Unknown	25970	NM_213624	291325	Rn.104457	NM_213624	ENSRNOG00000051684	St8sia6	Siat8f	ST8 alpha-N-acetyl-neuraminide alpha-2,8-sialyltransferase 6	protein-coding
MACS_peak_2035	chr11	58341879	58342240	+	23.65	NA	Intergenic	RatSatRep2|Unknown|Unknown	-282139	NM_017195	29423	Rn.10928	NM_017195	ENSRNOG00000001528	Gap43	Basp2	growth associated protein 43	protein-coding
MACS_peak_3078	chr14	66862518	66862888	+	23.65	NA	intron (NM_022632, intron 30 of 36)	RatSatRep2|Unknown|Unknown	-60380	NR_037348	100526634		NR_037348	ENSRNOG00000035486	Mir3565	Mir218b|rno-mir-218b|rno-mir-3565	microRNA 3565	ncRNA
MACS_peak_11530	chrY_KL568162v1_random	1944900	1945468	+	23.65	NA	NA	L1_Rn|LINE|L1	NA	NA
MACS_peak_1205	chr1	230175316	230175910	+	23.65	NA	Intergenic	RatSatRep2|Unknown|Unknown	15248	NM_001000556	365413	Rn.138177	NM_001000556	ENSRNOG00000053372	Olr361	ratchr1-216570414-216571346_ORF	olfactory receptor 361	protein-coding
MACS_peak_241	chr1	49914852	49915336	+	23.64	NA	intron (NM_020093, intron 1 of 10)	L1_Rn|LINE|L1	154904	NM_020093	56816	Rn.207194	NM_020093		Prkn	Park|Park2	parkin RBR E3 ubiquitin protein ligase	protein-coding
MACS_peak_1019	chr1	193714521	193715181	+	23.62	NA	Intergenic	RatSatRep2|Unknown|Unknown	289983	NM_019158	29172	Rn.6315	NM_019158	ENSRNOG00000014652	Aqp8	AQP-8	aquaporin 8	protein-coding
MACS_peak_11481	chrY_KL568160v1_random	1608187	1608691	+	23.59	NA	NA	L1_Rn|LINE|L1	NA	NA
MACS_peak_2269	chr12	20787044	20787335	+	23.59	NA	intron (NM_001099509, intron 1 of 9)	RatSatRep2|Unknown|Unknown	190921	NM_001099513	681079	Rn.217926	NM_001099513	ENSRNOG00000047568	Vom2r64	-	vomeronasal 2 receptor, 64	protein-coding
MACS_peak_7207	chr4	44383366	44383924	+	23.57	NA	Intergenic	RatSatRep2|Unknown|Unknown	61762	NM_001039344	500040	Rn.44847	NM_001039344	ENSRNOG00000051952	Tes	-	testin LIM domain protein	protein-coding
MACS_peak_6333	chr20	45166772	45167031	+	23.57	NA	intron (NM_138831, intron 3 of 5)	RNHAL1|LINE|L1	-59369	NM_176080	337920	Rn.22741	NM_176080	ENSRNOG00000000590	Naglt1	Mfsd4b	Na+ dependent glucose transporter 1	protein-coding
MACS_peak_4846	chr19	27992714	27992982	+	23.55	NA	Intergenic	Intergenic	-130021	NM_001014221	363337	Rn.198445	NM_001014221	ENSRNOG00000042971	LOC363337	-	similar to RIKEN cDNA 1700081O22	protein-coding
MACS_peak_4897	chr19	29283844	29284106	+	23.53	NA	Intergenic	Intergenic	1057467	NM_053917	116699	Rn.10829	NM_053917	ENSRNOG00000018382	Inpp4b	-	inositol polyphosphate-4-phosphatase type II B	protein-coding
MACS_peak_3563	chr15	75418889	75419332	+	23.47	NA	Intergenic	RatSatRep2|Unknown|Unknown	2317665	NM_001191688	306091	Rn.232343	NM_001191688		Pcdh9	-	protocadherin 9	protein-coding
MACS_peak_1963	chr11	43536978	43537301	+	23.43	NA	Intergenic	RNHAL1|LINE|L1	16085	NM_001000727	404981	Rn.142259	NM_001000727	ENSRNOG00000046134	Olr1551	-	olfactory receptor 1551	protein-coding
MACS_peak_11445	chrY_KL568157v1_random	2116403	2116649	+	23.43	NA	NA	L1_Rn|LINE|L1	NA	NA
MACS_peak_8716	chr6	76104759	76105062	+	23.4	NA	intron (NM_001106730, intron 3 of 6)	L1_Rat1|LINE|L1	25030	NM_001106730	299050	Rn.35652	NM_001106730	ENSRNOG00000007043	RGD1305089	Mrpp3	similar to 1110008L16Rik protein	protein-coding
MACS_peak_922	chr1	181028040	181028281	+	23.38	NA	Intergenic	SATI_RN|Satellite|Satellite	-2017903	NM_001013434	365355	Rn.3271	NM_001013434	ENSRNOG00000012258	Rras2	-	RAS related 2	protein-coding
MACS_peak_5643	chr2	143486809	143487884	+	23.35	NA	intron (NM_080396, intron 1 of 9)	RatSatRep2|Unknown|Unknown	12023	NM_080396	84494	Rn.10853	NM_053434	ENSRNOG00000011133	Trpc4	Trp4|Trrp4	transient receptor potential cation channel, subfamily C, member 4	protein-coding
MACS_peak_10993	chrX	88150822	88151229	+	23.35	NA	Intergenic	RatSatRep2|Unknown|Unknown	170805	NM_001007700	312689	Rn.91427	NM_001007700	ENSRNOG00000059373	M6pr	-	mannose-6-phosphate receptor, cation dependent	protein-coding
MACS_peak_4927	chr19	36139304	36139569	+	23.34	NA	Intergenic	L1_Rn|LINE|L1	-885943	NM_001106175	291952	Rn.151252	NM_001106175	ENSRNOG00000013808	Ces2g	Ces2l|RGD1308358	carboxylesterase 2G	protein-coding
MACS_peak_8546	chr6	31057772	31058589	+	23.33	NA	Intergenic	Intergenic	-418891	NM_147136	257642		NM_147136		LOC257642	ribin	rRNA promoter binding protein	protein-coding
MACS_peak_1665	chr10	78149583	78149791	+	23.32	NA	intron (NM_001107038, intron 4 of 16)	intron (NM_001107038, intron 4 of 16)	18922	NM_001107038	303443	Rn.49449	NM_001107038	ENSRNOG00000032768	Stxbp4	-	syntaxin binding protein 4	protein-coding
MACS_peak_7568	chr4	121863393	121863646	+	23.31	NA	Intergenic	L1_Rn|LINE|L1	105927	NM_001166760	685880	Rn.222409	NM_001166760	ENSRNOG00000053093	Vom1r99	Vom1r-ps113	vomeronasal 1 receptor 99	protein-coding
MACS_peak_5113	chr2	9209584	9210029	+	23.29	NA	Intergenic	L1_Rn|LINE|L1	-316407	NM_001009698	315923	Rn.146128	NM_001009698	ENSRNOG00000016298	Lysmd3	RGD1308805	LysM domain containing 3	protein-coding
MACS_peak_627	chr1	123335859	123336302	+	23.28	NA	Intergenic	RatSatRep2|Unknown|Unknown	-235616	NM_001170562	308692	Rn.12601	NM_001170562	ENSRNOG00000024429	Peg12	-	paternally expressed 12	protein-coding
MACS_peak_8372	chr5	161385150	161385707	+	23.28	NA	Intergenic	RatSatRep2|Unknown|Unknown	-349889	NM_001014070	313672	Rn.3753	NM_001014070	ENSRNOG00000014322	Kazn	Kaz	kazrin, periplakin interacting protein	protein-coding
MACS_peak_2186	chr12	7745771	7746475	+	23.23	NA	Intergenic	RatSatRep2|Unknown|Unknown	-119815	NM_001015030	363869	Rn.12128	NM_001015030	ENSRNOG00000000921	Ubl3	-	ubiquitin-like 3	protein-coding
MACS_peak_3091	chr14	70482905	70483121	+	23.22	NA	Intergenic	RatSatRep2|Unknown|Unknown	-297592	NM_001106009	289664	Rn.94720	NM_001106009	ENSRNOG00000003205	Ldb2	-	LIM domain binding 2	protein-coding
MACS_peak_11250	chrX	156642761	156643077	+	23.22	NA	Intergenic	L1_Rat1|LINE|L1	-7470	NM_022673	29386	Rn.9680	NM_022673	ENSRNOG00000056659	Mecp2	-	methyl CpG binding protein 2	protein-coding
MACS_peak_10490	chr9	101419167	101419514	+	23.22	NA	Intergenic	L1_Rn|LINE|L1	-30521	NM_001015019	316643	Rn.108412	NM_001015019	ENSRNOG00000051180	Chchd2	-	coiled-coil-helix-coiled-coil-helix domain containing 2	protein-coding
MACS_peak_2951	chr14	46546696	46547438	+	23.17	NA	Intergenic	Intergenic	-89863	NM_001025002	310926		NM_001025002		LOC310926	Aa1011|Aa1262|Ab2-057|Ac1147	hypothetical protein LOC310926	protein-coding
MACS_peak_212	chr1	41276976	41277200	+	23.15	NA	Intergenic	L1_Rat1|LINE|L1	-46116	NM_012689	24890	Rn.10595	NM_012689	ENSRNOG00000019358	Esr1	ER-alpha|Esr|RNESTROR	estrogen receptor 1	protein-coding
MACS_peak_7389	chr4	78649605	78649844	+	23.12	NA	Intergenic	RatSatRep2|Unknown|Unknown	10052	NM_199095	297081	Rn.56148	NM_199095	ENSRNOG00000008714	Svs1	-	seminal vesicle secretory protein 1	protein-coding
MACS_peak_11060	chrX	106177300	106177651	+	23.12	NA	Intergenic	Intergenic	-111248	NM_001037216	501621	Rn.24735	NM_001037216	ENSRNOG00000023256	Nxf7	-	nuclear RNA export factor 7	protein-coding
MACS_peak_7271	chr4	55305074	55305501	+	23.11	NA	intron (NM_022202, intron 1 of 9)	L1_Rn|LINE|L1	93831	NM_022202	60590	Rn.44420	NM_022202	ENSRNOG00000021468	Grm8	Glur8|Gprc1h|Mglur8|mGluR8b|mGlur	glutamate metabotropic receptor 8	protein-coding
MACS_peak_5441	chr2	89136413	89137734	+	23.1	NA	intron (NM_001024978, intron 3 of 5)	RatSatRep2|Unknown|Unknown	173873	NM_001024978	294883	Rn.24012	NM_001024978	ENSRNOG00000011400	Ralyl	RGD1305844	RALY RNA binding protein-like	protein-coding
MACS_peak_6001	chr2	234860348	234860635	+	23.1	NA	Intergenic	L1_Rn|LINE|L1	316784	NM_012842	25313	Rn.6075	NM_012842	ENSRNOG00000053979	Egf	-	epidermal growth factor	protein-coding
MACS_peak_7711	chr4	163466103	163466391	+	23.1	NA	Intergenic	L1_Rat1|LINE|L1	-2529	NM_001037441	29683	Rn.9895	NM_001037441	ENSRNOG00000055196	Klrc1	rNKG2A	killer cell lectin like receptor C1	protein-coding
MACS_peak_9419	chr7	89860917	89861228	+	23.08	NA	Intergenic	L1_Rn|LINE|L1	457149	NM_001134837	299897	Rn.229882	NM_001134837	ENSRNOG00000024998	Trps1	-	transcriptional repressor GATA binding 1	protein-coding
MACS_peak_621	chr1	121471493	121472138	+	23.08	NA	Intergenic	L1_Rn|LINE|L1	-278580	NR_037392	100526625		NR_037392	ENSRNOG00000049100	Mir344b-1	rno-mir-344b-1	microRNA 344b-1	ncRNA
MACS_peak_4837	chr19	27944910	27945660	+	23.08	NA	Intergenic	Intergenic	-82458	NM_001014221	363337	Rn.198445	NM_001014221	ENSRNOG00000042971	LOC363337	-	similar to RIKEN cDNA 1700081O22	protein-coding
MACS_peak_7712	chr4	164555262	164555543	+	23.04	NA	intron (NM_153726, intron 3 of 6)	L1_Rn|LINE|L1	-20553	NM_001009495	494204	Rn.83631	NM_001009495	ENSRNOG00000051600	Ly49i4	-	Ly49 inhibitory receptor 4	protein-coding
MACS_peak_5091	chr2	6990180	6990431	+	23.04	NA	Intergenic	RNHAL1|LINE|L1	-1410411	NM_031130	81808	Rn.89710	NM_031130	ENSRNOG00000014795	Nr2f1	COUP-TFI	nuclear receptor subfamily 2, group F, member 1	protein-coding
MACS_peak_10629	chrX	856436	856804	+	23.04	NA	Intergenic	RatSatRep2|Unknown|Unknown	59333	NM_001108058	314431	Rn.56171	NM_001108058	ENSRNOG00000045622	Spaca5	-	sperm acrosome associated 5	protein-coding
MACS_peak_5785	chr2	172891119	172891346	+	23.04	NA	intron (NM_001100666, intron 4 of 10)	L1_Rn|LINE|L1	196004	NM_001100666	295105	Rn.22212	NM_001100666	ENSRNOG00000009276	Schip1	-	schwannomin interacting protein 1	protein-coding
MACS_peak_8014	chr5	64255048	64255516	+	23.03	NA	Intergenic	RatSatRep2|Unknown|Unknown	-27069	NM_001108664	362516	Rn.22294	NM_001108664	ENSRNOG00000008159	Msantd3	RGD1308165	Myb/SANT DNA binding domain containing 3	protein-coding
MACS_peak_1099	chr1	213674722	213675086	+	23.03	NA	Intergenic	L1_Rat1|LINE|L1	-2050	NM_134375	171390	Rn.9669	NM_134375	ENSRNOG00000045677	Nlrp6	Avr|Nalp6|Navr|Navr/Avr|Non-AVR	NLR family, pyrin domain containing 6	protein-coding
MACS_peak_10880	chrX	49839930	49840159	+	23.03	NA	Intergenic	L1_Rn|LINE|L1	-759016	NM_001319644	102548478		NM_001319644		LOC102548478	LRRGT00159	uncharacterized LOC102548478	protein-coding
MACS_peak_8044	chr5	71366949	71367635	+	23.03	NA	Intergenic	L1_Rn|LINE|L1	728136	NM_001014191	362521	Rn.22285	NM_001014191	ENSRNOG00000028063	Tmem38b	RGD1305703	transmembrane protein 38B	protein-coding
MACS_peak_9975	chr8	100220465	100220743	+	22.99	NA	Intergenic	L1_Rn|LINE|L1	243270	NM_001142915	300901	Rn.12945	NM_175869	ENSRNOG00000030183	Plod2	-	procollagen lysine, 2-oxoglutarate 5-dioxygenase 2	protein-coding
MACS_peak_6262	chr20	26456531	26456752	+	22.99	NA	Intergenic	L1_Rat1|LINE|L1	-299307	NM_001012074	309758	Rn.18143	NM_001012074	ENSRNOG00000061040	Herc4	-	HECT and RLD domain containing E3 ubiquitin protein ligase 4	protein-coding
MACS_peak_5009	chr19	62076092	62076312	+	22.96	NA	Intergenic	RNHAL1|LINE|L1	398660	NM_017022	24511	Rn.25733	NM_017022	ENSRNOG00000010966	Itgb1	-	integrin subunit beta 1	protein-coding
MACS_peak_325	chr1	55753694	55754346	+	22.93	NA	Intergenic	Intergenic	141616	NM_001099465	685666	Rn.217930	NM_001099465	ENSRNOG00000013671	Vom2r9	RGD1564755	vomeronasal 2 receptor, 9	protein-coding
MACS_peak_5381	chr2	74730648	74731175	+	22.92	NA	Intergenic	L1_Rat1|LINE|L1	2901715	NM_022300	64160	Rn.37779	NM_022300		Basp1	NAP22	brain abundant, membrane attached signal protein 1	protein-coding
MACS_peak_4299	chr17	69480468	69480842	+	22.92	NA	intron (NM_001164396, intron 3 of 7)	RatSatRep2|Unknown|Unknown	12228	NM_001164396	498789	Rn.14713	NM_001164396	ENSRNOG00000038361	RGD1564865	RGD1309566	similar to 20-alpha-hydroxysteroid dehydrogenase	protein-coding
MACS_peak_8552	chr6	31066449	31067335	+	22.92	NA	Intergenic	Intergenic	-427603	NM_147136	257642		NM_147136		LOC257642	ribin	rRNA promoter binding protein	protein-coding
MACS_peak_4412	chr18	14064100	14064511	+	22.92	NA	Intergenic	L1_Rat1|LINE|L1	-47592	NM_001107401	307553	Rn.148516	NM_001107401	ENSRNOG00000014775	Nol4	-	nucleolar protein 4	protein-coding
MACS_peak_2525	chr13	33762196	33762832	+	22.92	NA	Intergenic	SATI_RN|Satellite|Satellite	489136	NM_021762	60381	Rn.156195	NM_021762	ENSRNOG00000002319	Tsn	-	translin	protein-coding
MACS_peak_1675	chr10	80451876	80452138	+	22.92	NA	Intergenic	L1_Rn|LINE|L1	1135889	NM_001135039	303456	Rn.52378	NM_001135039	ENSRNOG00000002644	Utp18	RGD1309957|Wdr50	UTP18 small subunit processome component	protein-coding
MACS_peak_2819	chr14	8274011	8274730	+	22.91	NA	intron (NM_012806, intron 4 of 13)	RatSatRep2|Unknown|Unknown	157706	NM_001012032	305156	Rn.24657	NM_001012032	ENSRNOG00000056944	Arhgap24	DR-NR#2	Rho GTPase activating protein 24	protein-coding
MACS_peak_4373	chr18	2182632	2183244	+	22.9	NA	Intergenic	Intergenic	-127919	NR_032116	100314077		NR_032116		Mir1	rno-mir-1	microRNA 1	ncRNA
MACS_peak_7631	chr4	141782417	141782626	+	22.83	NA	Intergenic	RatSatRep2|Unknown|Unknown	-670095	NM_031040	81672	Rn.10409	NM_031040	ENSRNOG00000005662	Grm7	-	glutamate metabotropic receptor 7	protein-coding
MACS_peak_1580	chr10	53942440	53942729	+	22.83	NA	Intergenic	(GAA)n|Simple_repeat|Simple_repeat	123766	NM_001100485	252942	Rn.202948	NM_001100485		Myh8	-	myosin heavy chain 8	protein-coding
MACS_peak_6370	chr20	55366438	55366746	+	22.83	NA	intron (NM_001277057, intron 13 of 41)	L1_Rat1|LINE|L1	112906	NM_001277057	309887	Rn.24209	NM_001107640	ENSRNOG00000037604	Ascc3	Helic1	activating signal cointegrator 1 complex subunit 3	protein-coding
MACS_peak_258	chr1	53702782	53703119	+	22.83	NA	Intergenic	RNHAL1|LINE|L1	138306	NM_013217	26955	Rn.58	NM_013217	ENSRNOG00000023753	Afdn	Af6|Mllt4	afadin, adherens junction formation factor	protein-coding
MACS_peak_2715	chr13	90003250	90003482	+	22.83	NA	intron (NM_001191673, intron 9 of 9)	(TGGTGG)n|Simple_repeat|Simple_repeat	18903	NM_001191673	289227	Rn.104826	NM_001191673	ENSRNOG00000025069	Ly9	-	lymphocyte antigen 9	protein-coding
MACS_peak_5214	chr2	31403073	31403306	+	22.83	NA	Intergenic	Intergenic	413196	NM_013005	25513	Rn.10599	NM_013005	ENSRNOG00000018903	Pik3r1	PI3KA	phosphoinositide-3-kinase regulatory subunit 1	protein-coding
MACS_peak_10584	chrUn_KL568226v1	655	881	+	22.83	NA	NA	(AGGCAC)n|Simple_repeat|Simple_repeat	NA	NA
MACS_peak_4661	chr18	78869200	78869533	+	22.83	NA	Intergenic	(TCTTCT)n|Simple_repeat|Simple_repeat	-188185	NM_001106148	291605	Rn.163370	NM_001106148	ENSRNOG00000047186	Myot	Ttid	myotilin	protein-coding
MACS_peak_4110	chr17	23210732	23210991	+	22.83	NA	Intergenic	(GCTGGGA)n|Simple_repeat|Simple_repeat	-34562	NM_214457	306844	Rn.22981	NM_214457		Phactr1	-	phosphatase and actin regulator 1	protein-coding
MACS_peak_5179	chr2	19776832	19777053	+	22.83	NA	Intergenic	L1_Rat1|LINE|L1	31995	NM_001191843	361875	Rn.73792	NM_001191843	ENSRNOG00000040201	Atp6ap1l	RGD1564936	ATPase H+ transporting accessory protein 1 like	protein-coding
MACS_peak_2062	chr11	67839388	67839631	+	22.83	NA	Intergenic	RNHAL1|LINE|L1	81498	NM_001109053	498089	Rn.1971	NM_001109053	ENSRNOG00000023400	Dtx3l	RGD1565144	deltex E3 ubiquitin ligase 3L	protein-coding
MACS_peak_11496	chrY_KL568161v1_random	2611597	2611926	+	22.83	NA	NA	(AAG)n|Simple_repeat|Simple_repeat	NA	NA
MACS_peak_7559	chr4	119805393	119806500	+	22.83	NA	Intergenic	CpG	-9300	NM_001031822	297428	Rn.50150	NM_001031822	ENSRNOG00000010474	Copg1	Copg	coatomer protein complex, subunit gamma 1	protein-coding
MACS_peak_6529	chr3	41963038	41963349	+	22.83	NA	Intergenic	L1_Rat1|LINE|L1	943295	NM_031610	50599	Rn.9809	NM_031610	ENSRNOG00000005369	Kcnj3	-	potassium voltage-gated channel subfamily J member 3	protein-coding
MACS_peak_3867	chr16	49536124	49536424	+	22.81	NA	Intergenic	L1_Rn|LINE|L1	38047	NM_053650	114108	Rn.13361	NM_053650	ENSRNOG00000012658	Pdlim3	Actn2lp|Alp	PDZ and LIM domain 3	protein-coding
MACS_peak_10250	chr9	36515406	36515777	+	22.81	NA	Intergenic	RatSatRep2|Unknown|Unknown	628424	NM_001108791	363210	Rn.21075	NM_001108791	ENSRNOG00000011756	Phf3	-	PHD finger protein 3	protein-coding
MACS_peak_3807	chr16	34313334	34313599	+	22.81	NA	Intergenic	RatSatRep2|Unknown|Unknown	-240500	NM_001135756	361142	Rn.214629	NM_001135756		Galntl6	Galnt17|RGD1564773	polypeptide N-acetylgalactosaminyltransferase-like 6	protein-coding
MACS_peak_6782	chr3	108937331	108937573	+	22.81	NA	Intergenic	L1_Rn|LINE|L1	72990	NR_032290	100314115		NR_032290	ENSRNOG00000040429	Mir674	rno-mir-674	microRNA 674	ncRNA
MACS_peak_894	chr1	180856356	180856707	+	22.79	NA	Intergenic	SATI_RN|Satellite|Satellite	-1846274	NM_001013434	365355	Rn.3271	NM_001013434	ENSRNOG00000012258	Rras2	-	RAS related 2	protein-coding
MACS_peak_3946	chr16	70188275	70188543	+	22.74	NA	Intergenic	RatSatRep2|Unknown|Unknown	-289334	NM_012928	25411	Rn.10384	NM_012928		Cnga2	Cncg4|OLFCH	cyclic nucleotide gated channel alpha 2	protein-coding
MACS_peak_11084	chrX	112742425	112742660	+	22.73	NA	Intergenic	RatSatRep2|Unknown|Unknown	413635	NM_001126298	678769	Rn.216396	NM_001126298		Atg4a	Agt4a|Atg4al1|RGD1588268	autophagy related 4A, cysteine peptidase	protein-coding
MACS_peak_8707	chr6	72695053	72695323	+	22.73	NA	Intergenic	L1_Rat1|LINE|L1	91647	NM_001108981	366619	Rn.105589	NM_001108981	ENSRNOG00000006727	Dtd2	RGD1309138	D-tyrosyl-tRNA deacylase 2	protein-coding
MACS_peak_4312	chr17	75457814	75458070	+	22.73	NA	intron (NM_001083586, intron 1 of 12)	RatSatRep2|Unknown|Unknown	198673	NM_017197	29428	Rn.162247	NM_017197	ENSRNOG00000023661	Celf2	Brunol3|Cugbp2|Etr3|Napor	CUGBP, Elav-like family member 2	protein-coding
MACS_peak_11556	chrY_KL568162v1_random	8370721	8371203	+	22.73	NA	NA	RatSatRep2|Unknown|Unknown	NA	NA
MACS_peak_4020	chr16	88679674	88679930	+	22.73	NA	Intergenic	RNHAL1|LINE|L1	-1645395	NM_017222	29500	Rn.85891	NM_017222	ENSRNOG00000037753	Slc10a2	ASBT|IBAT|ISBAT|ISBT	solute carrier family 10 member 2	protein-coding
MACS_peak_9071	chr7	11286279	11286531	+	22.73	NA	intron (NM_001009967, intron 1 of 18)	intron (NM_001009967, intron 1 of 18)	7844	NM_001009967	314641	Rn.2928	NM_001009967	ENSRNOG00000020577	Pip5k1c	-	phosphatidylinositol-4-phosphate 5-kinase type 1 gamma	protein-coding
MACS_peak_3673	chr16	178193	178672	+	22.72	NA	Intergenic	L1_Rn|LINE|L1	-579030	NM_031112	81776	Rn.979	NM_031112	ENSRNOG00000010189	Rps24	L33	ribosomal protein S24	protein-coding
MACS_peak_5888	chr2	203936775	203937117	+	22.72	NA	intron (NM_012830, intron 1 of 6)	L1_Rn|LINE|L1	95077	NM_012504	24211	Rn.2992	NM_012504	ENSRNOG00000030019	Atp1a1	Nkaa1b	ATPase Na+/K+ transporting subunit alpha 1	protein-coding
MACS_peak_1416	chr10	3441846	3442079	+	22.72	NA	intron (NM_001014114, intron 1 of 5)	L1_Rn|LINE|L1	30582	NM_001014114	360459	Rn.159940	NM_001014114	ENSRNOG00000003198	RGD1305733	-	similar to RIKEN cDNA 2900011O08	protein-coding
MACS_peak_8843	chr6	109267414	109267663	+	22.72	NA	Intergenic	NICER2_Rn|LTR|ERV1	-32895	NM_022197	314322	Rn.103750	NM_022197	ENSRNOG00000008015	Fos	c-fos	Fos proto-oncogene, AP-1 transcription factor subunit	protein-coding
MACS_peak_3723	chr16	17165164	17165395	+	22.72	NA	Intergenic	L1_Rat1|LINE|L1	-328721	NM_001014140	361118	Rn.13520	NM_001014140	ENSRNOG00000011140	Fam213a	PAMM|RGD1309676	family with sequence similarity 213, member A	protein-coding
MACS_peak_5345	chr2	68463915	68464142	+	22.72	NA	Intergenic	L1_Rn|LINE|L1	-951366	NM_001168631	29181	Rn.83592	NM_001168631	ENSRNOG00000009771	Cdh10	-	cadherin 10	protein-coding
MACS_peak_10913	chrX	58073642	58073992	+	22.72	NA	Intergenic	RatSatRep2|Unknown|Unknown	-1307924	NM_177935	317553	Rn.214479	NM_177935	ENSRNOG00000029663	Il1rapl1	Il1rapl	interleukin 1 receptor accessory protein-like 1	protein-coding
MACS_peak_2771	chr13	112852542	112852741	+	22.71	NA	Intergenic	RatSatRep2|Unknown|Unknown	-520928	NM_001105988	289392	Rn.205178	NM_001105988	ENSRNOG00000007324	Plxna2	-	plexin A2	protein-coding
MACS_peak_1365	chr1	268248571	268249551	+	22.7	NA	intron (NM_001106367, intron 2 of 26)	L1_Rn|LINE|L1	262756	NM_001106367	294043	Rn.46999	NM_001106367	ENSRNOG00000028832	Sorcs3	-	sortilin-related VPS10 domain containing receptor 3	protein-coding
MACS_peak_11512	chrY_KL568161v1_random	5462682	5463028	+	22.68	NA	NA	L1_Rn|LINE|L1	NA	NA
MACS_peak_10441	chr9	88981517	88981824	+	22.67	NA	intron (NM_001025025, intron 5 of 12)	L1_Rat1|LINE|L1	17140	NM_001025025	363267	Rn.104466	NM_001025025	ENSRNOG00000016247	Daw1	Wdr69	dynein assembly factor with WD repeats 1	protein-coding
MACS_peak_10483	chr9	99710615	99710827	+	22.67	NA	intron (NM_001009825, intron 5 of 9)	L1_Rn|LINE|L1	-10135	NM_001000520	316633	Rn.110764	NM_001000520	ENSRNOG00000046219	Olr1346	ratchr9-91970057-91971028_ORF	olfactory receptor 1346	protein-coding
MACS_peak_2461	chr13	25367685	25367984	+	22.67	NA	Intergenic	RNHAL1|LINE|L1	-105365	NM_001106305	293561	Rn.169056	NM_001106305	ENSRNOG00000014859	Rnf152	-	ring finger protein 152	protein-coding
MACS_peak_5391	chr2	77362841	77363198	+	22.67	NA	Intergenic	L1_Rn|LINE|L1	269607	NM_022300	64160	Rn.37779	NM_022300		Basp1	NAP22	brain abundant, membrane attached signal protein 1	protein-coding
MACS_peak_5434	chr2	85870303	85870746	+	22.67	NA	Intergenic	L1_Rn|LINE|L1	493206	NM_001107659	310207	Rn.14619	NM_001107659	ENSRNOG00000011977	Sema5a	-	semaphorin 5A	protein-coding
MACS_peak_2970	chr14	46604410	46605186	+	22.65	NA	intron (NM_147136, intron 1 of 5)	BC1_Rn|scRNA|scRNA	-32132	NM_001025002	310926		NM_001025002		LOC310926	Aa1011|Aa1262|Ab2-057|Ac1147	hypothetical protein LOC310926	protein-coding
MACS_peak_11257	chrX	159816687	159817146	+	22.62	NA	intron (NM_001005565, intron 2 of 21)	L1_Rn|LINE|L1	23888	NM_001005565	363509	Rn.208975	NM_001005565	ENSRNOG00000000869	Arhgef6	-	Rac/Cdc42 guanine nucleotide exchange factor 6	protein-coding
MACS_peak_921	chr1	181014594	181015162	+	22.61	NA	Intergenic	SATI_RN|Satellite|Satellite	-2004621	NM_001013434	365355	Rn.3271	NM_001013434	ENSRNOG00000012258	Rras2	-	RAS related 2	protein-coding
MACS_peak_10068	chr8	126913334	126914054	+	22.61	NA	Intergenic	Intergenic	-151598	NM_001106865	301056	Rn.37030	NM_001106865	ENSRNOG00000046257	Ctdspl	-	CTD small phosphatase like	protein-coding
MACS_peak_5575	chr2	123648715	123648960	+	22.59	NA	Intergenic	RNHAL1|LINE|L1	-112356	NM_001037184	294978	Rn.162572	NM_001037184	ENSRNOG00000038436	RGD1307100	RGD1309985|RGD1561393	similar to RIKEN cDNA D630029K19	protein-coding
MACS_peak_2075	chr11	74291800	74292137	+	22.59	NA	Intergenic	L1_Rn|LINE|L1	23281	NM_024360	29577	Rn.19727	NM_024360	ENSRNOG00000001720	Hes1	-	hes family bHLH transcription factor 1	protein-coding
MACS_peak_6453	chr3	17990376	17990673	+	22.59	NA	Intergenic	L1_Rn|LINE|L1	1672095	NM_001000969	405322	Rn.143029	NM_001000969	ENSRNOG00000048499	Olr410	-	olfactory receptor 410	protein-coding
MACS_peak_6	chr1	615207	615773	+	22.58	NA	Intergenic	RatSatRep2|Unknown|Unknown	-83923	NM_001099462	679691	Rn.217640	NM_001099462	ENSRNOG00000032365	Vom2r5	-	vomeronasal 2 receptor, 5	protein-coding
MACS_peak_4681	chr18	85731243	85731716	+	22.58	NA	Intergenic	L1_Rat1|LINE|L1	249354	NM_001271149	307200	Rn.8206	NM_001271149	ENSRNOG00000038212	Socs6	-	suppressor of cytokine signaling 6	protein-coding
MACS_peak_11123	chrX	120446104	120446481	+	22.58	NA	Intergenic	L1_Rn|LINE|L1	-178233	NM_001037544	298340	Rn.103683	NM_001037544	ENSRNOG00000005687	Slc6a14	Atb0+	solute carrier family 6 member 14	protein-coding
MACS_peak_5767	chr2	169799274	169799875	+	22.58	NA	Intergenic	RatSatRep2|Unknown|Unknown	501774	NM_013061	497756	Rn.10057	NM_013061	ENSRNOG00000031067	Si	SUCIMAL	sucrase-isomaltase	protein-coding
MACS_peak_11338	chrY_KL568141v1_random	717252	717572	+	22.58	NA	NA	RatSatRep2|Unknown|Unknown	NA	NA
MACS_peak_3586	chr15	81287103	81287361	+	22.58	NA	Intergenic	RNHAL1|LINE|L1	-574079	NM_001106054	290426	Rn.218562	NM_001106054	ENSRNOG00000031100	Klhl1	-	kelch-like family member 1	protein-coding
MACS_peak_4292	chr17	65116251	65116517	+	22.58	NA	Intergenic	RNHAL1|LINE|L1	-380975	NM_172330	282833	Rn.91141	NM_172330	ENSRNOG00000027506	Zp4	Zp-4	zona pellucida glycoprotein 4	protein-coding
MACS_peak_438	chr1	75461935	75462232	+	22.58	NA	intron (NM_001145982, intron 6 of 13)	RatSatRep2|Unknown|Unknown	22048	NM_001145982	691810	Rn.137082	NM_001145982	ENSRNOG00000026764	Pla2g4c	Pla2g4cl1|Pla2g4cl2	phospholipase A2 group IVC	protein-coding
MACS_peak_6183	chr20	5375479	5376104	+	22.56	NA	exon (NM_001008829, exon 3 of 8)	exon (NM_001008829, exon 3 of 8)	780	NM_001008829	24974	Rn.116787	NM_001008829	ENSRNOG00000030712	RT1-A2	RT1-A2n|RT1.A2(N)|RT1A-2	RT1 class Ia, locus A2	protein-coding
MACS_peak_10056	chr8	123748913	123749210	+	22.56	NA	Intergenic	Intergenic	-378332	NM_001170539	363160	Rn.23748	NM_001170539	ENSRNOG00000011922	Stt3b	RGD1311563	STT3B, catalytic subunit of the oligosaccharyltransferase complex	protein-coding
MACS_peak_1251	chr1	242844983	242845280	+	22.56	NA	intron (NM_133535, intron 6 of 14)	intron (NM_133535, intron 6 of 14)	16586	NM_133535	171057	Rn.49017	NM_133535	ENSRNOG00000015516	Cbwd1	-	COBW domain containing 1	protein-coding
MACS_peak_10551	chr9	118783250	118783479	+	22.56	NA	intron (NM_022946, intron 2 of 12)	RatSatRep2|Unknown|Unknown	-65822	NM_001304287	65040	Rn.90059	NM_022946	ENSRNOG00000016196	Dlgap1	DAP-1|GKAP/SAPAP1|Gkap|SAPAP1|rGKAP	DLG associated protein 1	protein-coding
MACS_peak_2980	chr14	46624146	46624418	+	22.55	NA	intron (NM_147136, intron 1 of 5)	RMER17B_Rn|LTR|ERVK	-12648	NM_001025002	310926		NM_001025002		LOC310926	Aa1011|Aa1262|Ab2-057|Ac1147	hypothetical protein LOC310926	protein-coding
MACS_peak_4508	chr18	38412920	38413387	+	22.52	NA	Intergenic	SATI_RN|Satellite|Satellite	-83373	NM_001106149	291608	Rn.137959	NM_001106149	ENSRNOG00000039260	RGD1563060	-	similar to AVLV472	protein-coding
MACS_peak_763	chr1	159445653	159445904	+	22.49	NA	Intergenic	L1_Rat1|LINE|L1	1524992	NM_001109150	499205	Rn.229468	NM_001109150	ENSRNOG00000010763	Fam181b	RGD1564695	family with sequence similarity 181, member B	protein-coding
MACS_peak_11273	chrY	1459727	1460420	+	22.49	NA	Intergenic	L1_Rn|LINE|L1	-56651	NM_001329902	103694559		NM_001329902	ENSRNOG00000058664	Usp9y	-	ubiquitin specific peptidase 9, Y-linked	protein-coding
MACS_peak_7424	chr4	87158738	87159382	+	22.48	NA	Intergenic	RatSatRep2|Unknown|Unknown	-8454	NM_001007646	297123	Rn.105976	NM_001007646	ENSRNOG00000005478	Fkbp9	FKBP-9	FK506 binding protein 9	protein-coding
MACS_peak_7855	chr5	20741980	20742246	+	22.46	NA	Intergenic	L1_Mur1|LINE|L1	-552392	NM_001108654	362481	Rn.161967	NM_001108654	ENSRNOG00000010777	Tox	-	thymocyte selection-associated high mobility group box	protein-coding
MACS_peak_4089	chr17	14912071	14912362	+	22.46	NA	Intergenic	RatSatRep2|Unknown|Unknown	-84020	NM_001108880	364680	Rn.12744	NM_001108880	ENSRNOG00000016915	Barx1	-	BARX homeobox 1	protein-coding
MACS_peak_1109	chr1	214614957	214615699	+	22.44	NA	Intergenic	Intergenic	81044	NM_031008	81637	Rn.34928	NM_031008	ENSRNOG00000019534	Ap2a2	-	adaptor-related protein complex 2, alpha 2 subunit	protein-coding
MACS_peak_4533	chr18	45240633	45241099	+	22.44	NA	Intergenic	RatSatRep2|Unknown|Unknown	139864	NM_001106146	291585	Rn.225791	NM_001106146	ENSRNOG00000025422	Pudp	Fam16ax|Hdhd1|Hdhd1a	pseudouridine 5'-phosphatase	protein-coding
MACS_peak_8677	chr6	67090747	67091029	+	22.44	NA	Intergenic	RNHAL1|LINE|L1	-5498	NM_001100541	298992	Rn.206187	NM_001100541	ENSRNOG00000031440	Nova1	Nova-1	NOVA alternative splicing regulator 1	protein-coding
MACS_peak_5816	chr2	182835925	182836416	+	22.43	NA	Intergenic	L1_Rn|LINE|L1	9891	NM_198769	310553	Rn.46387	NM_198769	ENSRNOG00000009822	Tlr2	-	toll-like receptor 2	protein-coding
MACS_peak_10916	chrX	59541842	59542118	+	22.43	NA	Intergenic	RNHAL1|LINE|L1	1310603	NM_001106946	302442	Rn.218663	NM_001106946	ENSRNOG00000003110	Mageb5	Mageb17|RGD1563078	MAGE family member B5	protein-coding
MACS_peak_872	chr1	180508455	180508655	+	22.42	NA	Intergenic	ISAT_RN|Satellite|Satellite	-1498298	NM_001013434	365355	Rn.3271	NM_001013434	ENSRNOG00000012258	Rras2	-	RAS related 2	protein-coding
MACS_peak_10574	chrM	12011	13007	+	22.4	NA	NA	Intergenic	NA	NA
MACS_peak_6047	chr2	246657575	246658191	+	22.39	NA	Intergenic	L1_Rn|LINE|L1	80114	NM_053994	117098	Rn.11126	NM_053994	ENSRNOG00000016223	Pdha2	Pdhal	pyruvate dehydrogenase E1 alpha 2 subunit	protein-coding
MACS_peak_4798	chr19	26280913	26281240	+	22.39	NA	Intergenic	RatSatRep2|Unknown|Unknown	84239	NM_199404	361378	Rn.102840	NM_199404	ENSRNOG00000023910	Man2b1	Manb	mannosidase, alpha, class 2B, member 1	protein-coding
MACS_peak_3535	chr15	66141510	66141824	+	22.39	NA	Intergenic	RatSatRep2|Unknown|Unknown	-633683	NM_017326	50663	Rn.5968	NM_017326		Calm2	CaMII|Cam|Cam2|Camb	calmodulin 2	protein-coding
MACS_peak_5372	chr2	73041326	73041774	+	22.39	NA	Intergenic	L1_Rn|LINE|L1	3626156	NM_001168631	29181	Rn.83592	NM_001168631	ENSRNOG00000009771	Cdh10	-	cadherin 10	protein-coding
MACS_peak_5520	chr2	108037988	108038585	+	22.39	NA	Intergenic	RatSatRep2|Unknown|Unknown	805232	NM_001108941	365755	Rn.140831	NM_001108941	ENSRNOG00000011216	Tbl1xr1	RGD1560053	transducin (beta)-like 1 X-linked receptor 1	protein-coding
MACS_peak_11564	chrY_KL568162v1_random	10550780	10551082	+	22.39	NA	NA	RatSatRep2|Unknown|Unknown	NA	NA
MACS_peak_1502	chr10	31579751	31580031	+	22.39	NA	intron (NM_001100762, intron 5 of 6)	intron (NM_001100762, intron 5 of 6)	17996	NM_001100762	363578	Rn.219486	NM_001100762	ENSRNOG00000031443	Havcr2	tim3	hepatitis A virus cellular receptor 2	protein-coding
MACS_peak_5654	chr2	146417924	146418234	+	22.39	NA	Intergenic	RatSatRep2|Unknown|Unknown	973983	NM_001106434	295061	Rn.24712	NM_001106434	ENSRNOG00000015812	Tm4sf1	-	transmembrane 4 L six family member 1	protein-coding
MACS_peak_2999	chr14	46659719	46659926	+	22.38	NA	intron (NM_001025002, intron 2 of 6)	intron (NM_001025002, intron 2 of 6)	-7996	NM_147136	257642		NM_147136		LOC257642	ribin	rRNA promoter binding protein	protein-coding
MACS_peak_4851	chr19	28029154	28029477	+	22.37	NA	Intergenic	RatSatRep2|Unknown|Unknown	-166488	NM_001014221	363337	Rn.198445	NM_001014221	ENSRNOG00000042971	LOC363337	-	similar to RIKEN cDNA 1700081O22	protein-coding
MACS_peak_5551	chr2	116646659	116647295	+	22.34	NA	intron (NM_001107663, intron 4 of 11)	RNHAL1|LINE|L1	120749	NM_001107663	310269	Rn.218693	NM_001107663		Egfem1	RGD1307225	EGF-like and EMI domain containing 1	protein-coding
MACS_peak_5246	chr2	42596142	42596402	+	22.34	NA	Intergenic	RNHAL1|LINE|L1	-233141	NM_001106409	294732	Rn.218516	NM_001106409	ENSRNOG00000043292	Actbl2	RGD1309504	actin, beta-like 2	protein-coding
MACS_peak_8292	chr5	146403242	146404672	+	22.34	NA	Intergenic	(TCCTCC)n|Simple_repeat|Simple_repeat	42270	NM_001109463	685271	Rn.172241	NM_001109463	ENSRNOG00000032889	Hmgb4	-	high-mobility group box 4	protein-coding
MACS_peak_7435	chr4	88013021	88013390	+	22.32	NA	Intergenic	RatSatRep2|Unknown|Unknown	-427862	NM_001108630	362374	Rn.154707	NM_001108630	ENSRNOG00000006646	Vopp1	Ecop|RGD1306494	VOPP1, WBP1/VOPP1 family member	protein-coding
MACS_peak_1175	chr1	225793841	225794335	+	22.32	NA	Intergenic	L1_Rn|LINE|L1	103332	NM_207593	293731	Rn.10394	NM_207593	ENSRNOG00000020301	Scgb1d4	Psbp2|Psbpc2	secretoglobin family 1D member 4	protein-coding
MACS_peak_125	chr1	22962094	22962685	+	22.29	NA	Intergenic	L1_Rn|LINE|L1	204175	NM_031709	65139	Rn.8400	NM_031709	ENSRNOG00000016411	Rps12	-	ribosomal protein S12	protein-coding
MACS_peak_10608	chrUn_KL568434v1	78280	78596	+	22.29	NA	NA	(AGAC)n|Simple_repeat|Simple_repeat	NA	NA
MACS_peak_8354	chr5	159130051	159130332	+	22.29	NA	Intergenic	(CTGCCT)n|Simple_repeat|Simple_repeat	126508	NM_001191766	298595	Rn.228213	NM_001191766	ENSRNOG00000037079	Padi6	RGD1560424	peptidyl arginine deiminase 6	protein-coding
MACS_peak_307	chr1	55653820	55654151	+	22.28	NA	Intergenic	Intergenic	241651	NM_001099465	685666	Rn.217930	NM_001099465	ENSRNOG00000013671	Vom2r9	RGD1564755	vomeronasal 2 receptor, 9	protein-coding
MACS_peak_11539	chrY_KL568162v1_random	3449062	3449769	+	22.26	NA	NA	RatSatRep2|Unknown|Unknown	NA	NA
MACS_peak_4713	chr19	3867981	3868233	+	22.26	NA	Intergenic	RatSatRep2|Unknown|Unknown	1475048	NM_053392	84407	Rn.8900	NM_053392	ENSRNOG00000013481	Cdh11	-	cadherin 11	protein-coding
MACS_peak_3273	chr15	62026	62400	+	22.26	NA	Intergenic	RatSatRep2|Unknown|Unknown	-281990	NM_031828	83731	Rn.30616	NM_031828	ENSRNOG00000005985	Kcnma1	BKCa|KCNMA1b|KCNMA1c|Kcnma|Slo|cbv1	potassium calcium-activated channel subfamily M alpha 1	protein-coding
MACS_peak_8979	chr6	145759404	145759728	+	22.25	NA	intron (NM_001034953, intron 1 of 9)	RatSatRep2|Unknown|Unknown	19531	NM_001034953	619566	Rn.201759	NM_001034953	ENSRNOG00000005410	Cdca7l	-	cell division cycle associated 7 like	protein-coding
MACS_peak_8131	chr5	96303156	96303397	+	22.25	NA	Intergenic	RatSatRep2|Unknown|Unknown	-2084015	NM_001106664	298182	Rn.40774	NM_001106664	ENSRNOG00000029318	Tyrp1	B	tyrosinase-related protein 1	protein-coding
MACS_peak_10153	chr9	9534137	9534555	+	22.21	NA	intron (NM_001007557, intron 2 of 21)	L1_Rat1|LINE|L1	51506	NM_001007557	316137	Rn.205884	NM_001007557	ENSRNOG00000046254	Adgre1	Emr1	adhesion G protein-coupled receptor E1	protein-coding
MACS_peak_4557	chr18	50843336	50843555	+	22.17	NA	Intergenic	L1_Rn|LINE|L1	-648751	NM_001014011	307288	Rn.53932	NM_001014011	ENSRNOG00000015225	Gramd3	Gramd2b|RGD1311016	GRAM domain containing 3	protein-coding
MACS_peak_8869	chr6	115701488	115701700	+	22.12	NA	Intergenic	L1_Rn|LINE|L1	-84736	NM_177933	314352	Rn.162892	NM_177933	ENSRNOG00000004464	Sel1l	Sel1h	SEL1L ERAD E3 ligase adaptor subunit	protein-coding
MACS_peak_8860	chr6	114513148	114513515	+	22.11	NA	Intergenic	RatSatRep2|Unknown|Unknown	-23888	NM_031720	65162	Rn.88380	NM_022688		Dio2	5DII|DIOII	iodothyronine deiodinase 2	protein-coding
MACS_peak_9255	chr7	45068663	45068877	+	22.09	NA	Intergenic	L1_Rn|LINE|L1	-259455	NM_172321	282712	Rn.9716	NM_172321	ENSRNOG00000027468	Slc6a15	Ntt73	solute carrier family 6 member 15	protein-coding
MACS_peak_9278	chr7	49496546	49496872	+	22.09	NA	intron (NM_053514, intron 1 of 4)	RatSatRep2|Unknown|Unknown	67096	NM_053514	85327	Rn.31766	NM_053514	ENSRNOG00000004527	Lin7a	Veli1	lin-7 homolog A, crumbs cell polarity complex component	protein-coding
MACS_peak_4526	chr18	43367747	43368435	+	22.09	NA	Intergenic	L1_Rat1|LINE|L1	577182	NM_001108431	361326	Rn.229130	NM_001108431	ENSRNOG00000059142	Dtwd2	RGD1306423	DTW domain containing 2	protein-coding
MACS_peak_863	chr1	178543801	178544056	+	22.09	NA	Intergenic	L1_Rn|LINE|L1	-92693	NM_172067	64456	Rn.7546	NM_172067	ENSRNOG00000058003	Spon1	Sponf	spondin 1	protein-coding
MACS_peak_7361	chr4	75616450	75616949	+	22.09	NA	Intergenic	RatSatRep2|Unknown|Unknown	-1595115	NM_001108627	362356	Rn.68078	NM_001108627	ENSRNOG00000005310	Cul1	-	cullin 1	protein-coding
MACS_peak_7349	chr4	71638965	71639817	+	22.09	NA	Intergenic	RatSatRep2|Unknown|Unknown	-13041	NM_022522	64314	Rn.1438	NM_022522	ENSRNOG00000016707	Casp2	-	caspase 2	protein-coding
MACS_peak_5880	chr2	201442837	201443255	+	22.07	NA	Intergenic	L1_Rn|LINE|L1	96290	NM_001106451	295315	Rn.224878	NM_001106451	ENSRNOG00000019565	Tbx15	-	T-box 15	protein-coding
MACS_peak_6465	chr3	23433644	23433873	+	22.07	NA	Intergenic	L1_Rn|LINE|L1	77201	NM_133589	171121	Rn.9573	NM_133589	ENSRNOG00000015145	Ppp6c	-	protein phosphatase 6, catalytic subunit	protein-coding
MACS_peak_2296	chr12	26091084	26091617	+	22.07	NA	Intergenic	RatSatRep2|Unknown|Unknown	-452544	NM_001100561	304410	Rn.137823	NM_001100561	ENSRNOG00000001484	Castor2	Gats|Gatsl2	cytosolic arginine sensor for mTORC1 subunit 2	protein-coding
MACS_peak_10505	chr9	103898092	103898325	+	22.07	NA	Intergenic	L1_Rn|LINE|L1	452054	NM_001002024	432363	Rn.123431	NM_001002024	ENSRNOG00000022711	Slco4c1	Oatp-H|Oatp-M1|Oatp4c1|Slc21A20	solute carrier organic anion transporter family, member 4C1	protein-coding
MACS_peak_577	chr1	106649402	106649665	+	22.05	NA	Intergenic	RatSatRep2|Unknown|Unknown	244531	NM_001103363	100125384	Rn.215024	NM_001103363		LOC100125384	-	hypothetical protein LOC100125384	protein-coding
MACS_peak_6868	chr3	132693796	132694048	+	22.03	NA	Intergenic	L1_Rn|LINE|L1	-42511	NM_001134552	311760	Rn.217311	NM_001134552		Ism1	RGD1562551	isthmin 1	protein-coding
MACS_peak_7223	chr4	46409788	46409999	+	22.02	NA	Intergenic	L1_Rn|LINE|L1	555490	NM_001109459	685171	Rn.218532	NM_001109459	ENSRNOG00000058543	LOC685171	-	similar to protein disulfide isomerase-associated 6	protein-coding
MACS_peak_7597	chr4	130262195	130262659	+	22.02	NA	intron (NM_001191089, intron 1 of 9)	L1_Rn|LINE|L1	89571	NM_001191089	25094	Rn.31427	NM_001191089	ENSRNOG00000008658	Mitf	-	melanogenesis associated transcription factor	protein-coding
MACS_peak_6012	chr2	237824656	237824895	+	22.02	NA	intron (NM_001134513, intron 19 of 24)	RatSatRep2|Unknown|Unknown	73121	NM_001134513	295446	Rn.25335	NM_001134513	ENSRNOG00000011454	Tbck	RGD1307816|Tbckl	TBC1 domain containing kinase	protein-coding
MACS_peak_20	chr1	5568745	5569084	+	22.02	NA	intron (NM_001276762, intron 3 of 3)	intron (NM_001276762, intron 3 of 3)	119956	NM_001276762	114005	Rn.121954	NM_001276762	ENSRNOG00000040242	Epm2a	-	EPM2A, laforin glucan phosphatase	protein-coding
MACS_peak_66	chr1	11949256	11949538	+	22	NA	Intergenic	(TCCCC)n|Simple_repeat|Simple_repeat	-20694	NR_046238	100861534		NR_046238	ENSRNOG00000059852	Rn5-8s	-	5.8S ribosomal RNA	rRNA
MACS_peak_6830	chr3	121908986	121909533	+	21.98	NA	Intergenic	L1_Rn|LINE|L1	-26622	NM_031512	24494	Rn.9869	NM_031512	ENSRNOG00000004649	Il1b	IL-1F2	interleukin 1 beta	protein-coding
MACS_peak_7072	chr4	15082521	15082790	+	21.97	NA	Intergenic	L1_Rn|LINE|L1	422628	NM_017017	24446	Rn.10468	NM_017017	ENSRNOG00000007027	Hgf	HPTA	hepatocyte growth factor	protein-coding
MACS_peak_5845	chr2	191346639	191347030	+	21.96	NA	Intergenic	RNHAL1|LINE|L1	-52460	NM_001109187	499657	Rn.94762	NM_001109187	ENSRNOG00000043325	S100a7l2	RGD1562234	S100 calcium binding protein A7 like 2	protein-coding
MACS_peak_10333	chr9	60082374	60082729	+	21.96	NA	Intergenic	L1_Rn|LINE|L1	61017	NM_001108796	363229		NM_001108796	ENSRNOG00000011677	Slc39a10	-	solute carrier family 39 member 10	protein-coding
MACS_peak_5398	chr2	78306012	78306304	+	21.96	NA	Intergenic	L1_Rn|LINE|L1	43319	NM_001009652	294846	Rn.111017	NM_001009652	ENSRNOG00000059443	Zfp622	Znf622	zinc finger protein 622	protein-coding
MACS_peak_7859	chr5	21404887	21405613	+	21.96	NA	Intergenic	RNHAL1|LINE|L1	-59440	NM_001009662	297814	Rn.22066	NM_001009662	ENSRNOG00000005669	Car8	Ca8	carbonic anhydrase 8	protein-coding
MACS_peak_10632	chrX	1668587	1669003	+	21.96	NA	Intergenic	RatSatRep2|Unknown|Unknown	35196	NM_001008861	408217	Rn.2492	NM_001008861	ENSRNOG00000009049	Usp11	Uhx1	ubiquitin specific peptidase 11	protein-coding
MACS_peak_3967	chr16	75432731	75432960	+	21.92	NA	Intergenic	L1_Rat1|LINE|L1	4170	NM_001033077	613224	Rn.234253	NM_001033077	ENSRNOG00000046075	Defa8	-	defensin alpha 8	protein-coding
MACS_peak_2675	chr13	77892904	77893212	+	21.91	NA	intron (NM_001107189, intron 1 of 21)	L1_Rn|LINE|L1	3683	NM_001107189	304913	Rn.3715	NM_001107189	ENSRNOG00000002548	Tnn	-	tenascin N	protein-coding
MACS_peak_10636	chrX	2208012	2208491	+	21.91	NA	Intergenic	(GAGGCA)n|Simple_repeat|Simple_repeat	-91590	NM_001109012	367714	Rn.232192	NM_001109012	ENSRNOG00000025428	Rp2	RGD1565124|Rp2h	RP2, ARL3 GTPase activating protein	protein-coding
MACS_peak_11144	chrX	127028424	127028727	+	21.91	NA	Intergenic	L1_Rn|LINE|L1	-534085	NM_001112742	29628	Rn.74049	NM_032990	ENSRNOG00000007682	Gria3	GLUR3|GluA3|GluR-3|GluR-C|GluR-K3	glutamate ionotropic receptor AMPA type subunit 3	protein-coding
MACS_peak_4363	chr18	1067598	1067966	+	21.9	NA	Intergenic	L1_Rn|LINE|L1	-75000	NM_001047850	291797	Rn.202648	NM_001047850	ENSRNOG00000015332	Thoc1	LRRGT00070	THO complex 1	protein-coding
MACS_peak_308	chr1	55654646	55655174	+	21.88	NA	Intergenic	Lx5|LINE|L1	240726	NM_001099465	685666	Rn.217930	NM_001099465	ENSRNOG00000013671	Vom2r9	RGD1564755	vomeronasal 2 receptor, 9	protein-coding
MACS_peak_7140	chr4	29654485	29655202	+	21.88	NA	Intergenic	Intergenic	115059	NM_001002023	432360	Rn.185815	NM_001002023	ENSRNOG00000046905	Sgce	-	sarcoglycan, epsilon	protein-coding
MACS_peak_8100	chr5	88661951	88662362	+	21.87	NA	Intergenic	RatSatRep2|Unknown|Unknown	-32665	NM_001173433	362533	Rn.6875	NM_001173433	ENSRNOG00000005882	Tle1	-	transducin like enhancer of split 1	protein-coding
MACS_peak_1374	chr1	273335689	273336160	+	21.87	NA	Intergenic	RatSatRep2|Unknown|Unknown	422323	NM_131913	170751	Rn.25763	NM_131913	ENSRNOG00000012084	Xpnpep1	-	X-prolyl aminopeptidase 1	protein-coding
MACS_peak_2729	chr13	91455889	91456204	+	21.85	NA	Intergenic	L1_Rn|LINE|L1	-25415	NM_001000499	304985	Rn.142347	NM_001000499	ENSRNOG00000009141	Olr1576	-	olfactory receptor 1576	protein-coding
MACS_peak_421	chr1	71864085	71864358	+	21.85	NA	intron (NM_001169149, intron 6 of 8)	RatSatRep2|Unknown|Unknown	44917	NM_001169149	292577	Rn.222429	NM_001169149	ENSRNOG00000021913	Nlrp9	Nalp9a|Nalp9b|Nlrp9b	NLR family, pyrin domain containing 9	protein-coding
MACS_peak_2393	chr13	1733841	1734185	+	21.85	NA	Intergenic	RatSatRep2|Unknown|Unknown	214550	NM_001305281	297865		NM_001305281	ENSRNOG00000032307	Dsel	RGD1307724	dermatan sulfate epimerase-like	protein-coding
MACS_peak_1939	chr11	38942842	38943105	+	21.85	NA	Intergenic	Intergenic	-485598	NM_001107105	304056	Rn.98941	NM_001107105	ENSRNOG00000001623	Zbtb21	Zfp295|Znf295	zinc finger and BTB domain containing 21	protein-coding
MACS_peak_7463	chr4	94277557	94278103	+	21.85	NA	intron (NM_024379, intron 1 of 15)	RNHAL1|LINE|L1	209088	NM_024379	79220	Rn.10046	NM_024379	ENSRNOG00000006174	Grid2	GluD2	glutamate ionotropic receptor delta type subunit 2	protein-coding
MACS_peak_5646	chr2	144065675	144066137	+	21.85	NA	intron (NM_138872, intron 4 of 5)	RatSatRep2|Unknown|Unknown	-58270	NM_001044263	499617	Rn.198587	NM_001044263	ENSRNOG00000056028	Rfxap	-	regulatory factor X-associated protein	protein-coding
MACS_peak_6696	chr3	87193267	87193535	+	21.85	NA	Intergenic	RatSatRep2|Unknown|Unknown	1772232	NM_001107753	311236	Rn.219303	NM_001107753	ENSRNOG00000029798	Lrrc4c	RGD1311013	leucine rich repeat containing 4C	protein-coding
MACS_peak_5500	chr2	103949370	103949682	+	21.85	NA	intron (NM_001106425, intron 4 of 6)	L1_Rat1|LINE|L1	30071	NM_001106425	294948	Rn.17507	NM_001106425	ENSRNOG00000013253	Armc1	RGD1560393	armadillo repeat containing 1	protein-coding
MACS_peak_10155	chr9	9822715	9823132	+	21.85	NA	Intergenic	RatSatRep2|Unknown|Unknown	-19662	NM_001106878	301132	Rn.103013	NM_001106878	ENSRNOG00000051015	Cd70	-	Cd70 molecule	protein-coding
MACS_peak_2796	chr14	2532859	2533194	+	21.85	NA	Intergenic	RatSatRep2|Unknown|Unknown	-58022	NM_001011914	289881	Rn.6666	NM_001011914	ENSRNOG00000048308	Dr1	-	down-regulator of transcription 1, TBP-binding (negative cofactor 2)	protein-coding
MACS_peak_9200	chr7	29768647	29768963	+	21.85	NA	intron (NM_001106778, intron 1 of 25)	RNHAL1|LINE|L1	255731	NM_001106778	299714	Rn.23908	NM_001106778	ENSRNOG00000006841	Ano4	Tmem16d	anoctamin 4	protein-coding
MACS_peak_8531	chr6	30642454	30642736	+	21.81	NA	Intergenic	BC1_Rn|scRNA|scRNA	-3306	NM_147136	257642		NM_147136		LOC257642	ribin	rRNA promoter binding protein	protein-coding
MACS_peak_105	chr1	20243353	20243874	+	21.79	NA	Intergenic	L1_Rn|LINE|L1	-87653	NM_001172116	685940	Rn.222405	NM_001172116	ENSRNOG00000039955	Samd3	-	sterile alpha motif domain containing 3	protein-coding
MACS_peak_585	chr1	108899619	108899857	+	21.79	NA	Intergenic	L1_Rn|LINE|L1	-1514481	NM_001195599	499158	Rn.52198	NM_001195599	ENSRNOG00000049297	Ccdc179	RGD1559980	coiled-coil domain containing 179	protein-coding
MACS_peak_719	chr1	148646677	148647235	+	21.79	NA	Intergenic	Intergenic	196743	NM_001037659	652956	Rn.189455	NM_001037659		Mpp1	p55	membrane palmitoylated protein 1	protein-coding
MACS_peak_2519	chr13	33719755	33720073	+	21.79	NA	Intergenic	SATI_RN|Satellite|Satellite	531736	NM_021762	60381	Rn.156195	NM_021762	ENSRNOG00000002319	Tsn	-	translin	protein-coding
MACS_peak_10067	chr8	126899942	126900165	+	21.77	NA	Intergenic	Intergenic	-165239	NM_001106865	301056	Rn.37030	NM_001106865	ENSRNOG00000046257	Ctdspl	-	CTD small phosphatase like	protein-coding
MACS_peak_2789	chr14	1555623	1556069	+	21.76	NA	Intergenic	L1_Rn|LINE|L1	76532	NM_001011914	289881	Rn.6666	NM_001011914	ENSRNOG00000048308	Dr1	-	down-regulator of transcription 1, TBP-binding (negative cofactor 2)	protein-coding
MACS_peak_11242	chrX	155397763	155398102	+	21.73	NA	Intergenic	L1_Rn|LINE|L1	53756	NR_037380	100526600		NR_037380	ENSRNOG00000057982	Mir3585	rno-mir-3585	microRNA 3585	ncRNA
MACS_peak_1368	chr1	270824472	270824708	+	21.73	NA	Intergenic	L1_Rn|LINE|L1	-351724	NM_001191563	309533	Rn.225286	NM_001191563	ENSRNOG00000011313	Sorcs1	-	sortilin-related VPS10 domain containing receptor 1	protein-coding
MACS_peak_4765	chr19	15105732	15106053	+	21.71	NA	intron (NM_001103359, intron 3 of 13)	RatSatRep2|Unknown|Unknown	24316	NM_001103359	100125372	Rn.82692	NM_001103359	ENSRNOG00000015438	Ces1f	-	carboxylesterase 1F	protein-coding
MACS_peak_9105	chr7	13640132	13640337	+	21.68	NA	Intergenic	L1_Rn|LINE|L1	8259	NM_001000709	404958	Rn.143334	NM_001000709	ENSRNOG00000051708	Olr1084	-	olfactory receptor 1084	protein-coding
MACS_peak_3562	chr15	75418298	75418527	+	21.65	NA	Intergenic	RatSatRep2|Unknown|Unknown	2318363	NM_001191688	306091	Rn.232343	NM_001191688		Pcdh9	-	protocadherin 9	protein-coding
MACS_peak_5602	chr2	130446983	130447561	+	21.65	NA	Intergenic	RatSatRep2|Unknown|Unknown	210930	NM_001106429	295010	Rn.218503	NM_001106429	ENSRNOG00000029749	Pabpc4l	RGD1559517	poly(A) binding protein, cytoplasmic 4-like	protein-coding
MACS_peak_11181	chrX	137214695	137215240	+	21.64	NA	Intergenic	L1_Rn|LINE|L1	-199701	NM_001000491	302824	Rn.143698	NM_001000491	ENSRNOG00000029322	Olr1767	ratchrX-136588662-136587739_ORF	olfactory receptor 1767	protein-coding
MACS_peak_7592	chr4	127692884	127693534	+	21.64	NA	intron (NM_001100750, intron 6 of 10)	RNHAL1|LINE|L1	131761	NM_001100750	362404	Rn.234329	NM_001100750	ENSRNOG00000005686	Suclg2	-	succinate-CoA ligase, GDP-forming, beta subunit	protein-coding
MACS_peak_7851	chr5	18999814	19000020	+	21.61	NA	Intergenic	L1_Rn|LINE|L1	98878	NM_001024341	500400	Rn.20088	NM_001024341	ENSRNOG00000009114	Fam110b	-	family with sequence similarity 110, member B	protein-coding
MACS_peak_2916	chr14	40245746	40246029	+	21.61	NA	Intergenic	L1_Rn|LINE|L1	281299	NM_080586	140674	Rn.10366	NM_080586	ENSRNOG00000002360	Gabrg1	-	gamma-aminobutyric acid type A receptor gamma 1 subunit	protein-coding
MACS_peak_3276	chr15	1406020	1406778	+	21.61	NA	intron (NM_001109441, intron 6 of 6)	RatSatRep2|Unknown|Unknown	939837	NM_001109441	681383	Rn.205549	NM_001109441		Lrmda	-	leucine rich melanocyte differentiation associated	protein-coding
MACS_peak_36	chr1	9130658	9130885	+	21.61	NA	Intergenic	RatSatRep2|Unknown|Unknown	197001	NM_012799	25264	Rn.89709	NM_012799		Nmbr	NMB-R	neuromedin B receptor	protein-coding
MACS_peak_3604	chr15	87805590	87805823	+	21.61	NA	intron (NM_001108388, intron 24 of 30)	L1_Rat1|LINE|L1	-57126	NM_001014139	361087	Rn.21577	NM_001014139		Slain1	RGD1308626	SLAIN motif family, member 1	protein-coding
MACS_peak_4819	chr19	27093922	27094150	+	21.61	NA	Intergenic	L1_Rn|LINE|L1	-310631	NM_001110810	291926	Rn.204358	NM_001110810	ENSRNOG00000017546	Mylk3	MLCK|RGD1305801	myosin light chain kinase 3	protein-coding
MACS_peak_6721	chr3	93132632	93133010	+	21.61	NA	Intergenic	RatSatRep2|Unknown|Unknown	83595	NM_001106493	295965	Rn.220252	NM_001106493	ENSRNOG00000007484	Ehf	-	ets homologous factor	protein-coding
MACS_peak_4498	chr18	35246560	35246856	+	21.61	NA	Intergenic	L1_Rn|LINE|L1	-2429	NM_001008874	408235	Rn.142548	NM_001008874	ENSRNOG00000046265	Spink6	Spink5l1	serine peptidase inhibitor, Kazal type 6	protein-coding
MACS_peak_5296	chr2	55403321	55403805	+	21.61	NA	Intergenic	RNHAL1|LINE|L1	-343793	NM_024159	79128	Rn.161784	NM_024159	ENSRNOG00000028930	Dab2	Doc-2|Doc2	DAB2, clathrin adaptor protein	protein-coding
MACS_peak_232	chr1	46674534	46674800	+	21.61	NA	Intergenic	L1_Rn|LINE|L1	-105473	NM_001127637	683687	Rn.216425	NM_001127637	ENSRNOG00000046874	Snx9	-	sorting nexin 9	protein-coding
MACS_peak_3002	chr14	46671168	46671506	+	21.61	NA	intron (NM_001025002, intron 2 of 6)	intron (NM_001025002, intron 2 of 6)	-15646	NR_046238	100861534		NR_046238	ENSRNOG00000059852	Rn5-8s	-	5.8S ribosomal RNA	rRNA
MACS_peak_1073	chr1	207553026	207553261	+	21.61	NA	Intergenic	RatSatRep2|Unknown|Unknown	44729	NM_001271113	100360071	Rn.234299	NM_001271113	ENSRNOG00000036653	Nps	-	neuropeptide S	protein-coding
MACS_peak_3073	chr14	64767490	64767737	+	21.6	NA	Intergenic	L1_Rn|LINE|L1	-290817	NM_001106010	289687	Rn.19324	NM_001106010	ENSRNOG00000024634	Gba3	-	glucosylceramidase beta 3	protein-coding
MACS_peak_8047	chr5	71472074	71472576	+	21.6	NA	Intergenic	L1_Rn|LINE|L1	-631379	NM_001025275	298012	Rn.67042	NM_001025275	ENSRNOG00000016137	Rad23b	-	RAD23 homolog B, nucleotide excision repair protein	protein-coding
MACS_peak_7531	chr4	111976793	111977888	+	21.6	NA	Intergenic	RatSatRep2|Unknown|Unknown	667975	NR_102358	100911370	Rn.233507	NR_102358		LOC100911370	-	uncharacterized LOC100911370	ncRNA
MACS_peak_5899	chr2	206637209	206637434	+	21.6	NA	intron (NM_139084, intron 1 of 20)	RatSatRep2|Unknown|Unknown	61784	NM_139084	245903	Rn.228785	NM_139084	ENSRNOG00000019885	Magi3	Slipr	membrane associated guanylate kinase, WW and PDZ domain containing 3	protein-coding
MACS_peak_529	chr1	95001817	95002347	+	21.6	NA	Intergenic	RatSatRep2|Unknown|Unknown	-217631	NM_001108913	365238	Rn.218568	NM_001108913	ENSRNOG00000015168	LOC365238	-	similar to CG15432-PA	protein-coding
MACS_peak_10780	chrX	32580840	32581076	+	21.6	NA	Intergenic	L1_Rn|LINE|L1	85385	NM_001108255	317486		NM_001108255		RGD1565844	-	similar to RIKEN cDNA 1700045I19	protein-coding
MACS_peak_7764	chr4	179678798	179679410	+	21.59	NA	intron (NM_001191980, intron 6 of 8)	intron (NM_001191980, intron 6 of 8)	21026	NM_001191980	500362	Rn.225654	NM_001191980	ENSRNOG00000015910	Lmntd1	Ifltd1|RGD1560077	lamin tail domain containing 1	protein-coding
MACS_peak_2817	chr14	6694108	6694377	+	21.58	NA	Intergenic	L1_Rn|LINE|L1	-14321	NM_012881	25353	Rn.8871	NM_012881	ENSRNOG00000043451	Spp1	OSP	secreted phosphoprotein 1	protein-coding
MACS_peak_5844	chr2	190950895	190951424	+	21.58	NA	Intergenic	L1_Rn|LINE|L1	322634	NM_176076	295176	Rn.54023	NM_176076	ENSRNOG00000028310	S100vp	S100RVP	S100 calcium-binding protein, ventral prostate	protein-coding
MACS_peak_1867	chr11	17286239	17286858	+	21.58	NA	Intergenic	L1_Rn|LINE|L1	-166966	NM_001108312	360692	Rn.146501	NM_001108312	ENSRNOG00000001554	RGD1563888	-	similar to DNA segment, Chr 16, ERATO Doi 472, expressed	protein-coding
MACS_peak_10431	chr9	85456917	85457163	+	21.55	NA	Intergenic	L1_Rn|LINE|L1	-11101	NM_001172150	367304	Rn.33461	NM_001172150	ENSRNOG00000049873	Ap1s3	-	adaptor related protein complex 1 sigma 3 subunit	protein-coding
MACS_peak_3906	chr16	58645686	58646054	+	21.55	NA	Intergenic	RatSatRep2|Unknown|Unknown	85803	NM_001109512	688765	Rn.54726	NM_001109512		LOC688765	-	hypothetical protein LOC688765	protein-coding
MACS_peak_11408	chrY_KL568151v1_random	2470773	2471354	+	21.55	NA	NA	(CCT)n|Simple_repeat|Simple_repeat	NA	NA
MACS_peak_2093	chr11	80092410	80092627	+	21.55	NA	Intergenic	(TTC)n|Simple_repeat|Simple_repeat	-163272	NM_001107084	303836	Rn.20571	NM_001107084	ENSRNOG00000001843	Bcl6	-	B-cell CLL/lymphoma 6	protein-coding
MACS_peak_6719	chr3	93027608	93027923	+	21.55	NA	Intergenic	Intergenic	58587	NM_001106492	295961	Rn.15452	NM_001106492	ENSRNOG00000007446	Apip	RGD1564562	APAF1 interacting protein	protein-coding
MACS_peak_6991	chr3	172372260	172372726	+	21.54	NA	Intergenic	CpG	-2464	NM_001159653	24896	Rn.31	NM_019132	ENSRNOG00000025889	Gnas	ALEX|G-alpha-8|Gnas1|Gnpas|Nesp55|SCG6	GNAS complex locus	protein-coding
MACS_peak_10644	chrX	2344161	2344438	+	21.54	NA	Intergenic	(AGAGGC)n|Simple_repeat|Simple_repeat	-91006	NM_001108242	317170	Rn.218517	NM_001108242	ENSRNOG00000004150	Slc9a7	Nhe7	solute carrier family 9 member A7	protein-coding
MACS_peak_2446	chr13	19653253	19653467	+	21.53	NA	Intergenic	(TTC)n|Simple_repeat|Simple_repeat	-2025152	NM_001047873	301650	Rn.202933	NM_001047873	ENSRNOG00000032206	Cntnap5b	Caspr5-2|Caspr5-3|Cntnap5c|RGD1565194	contactin associated protein-like 5B	protein-coding
MACS_peak_7316	chr4	66314495	66314705	+	21.53	NA	intron (NM_001107853, intron 2 of 9)	L1_Rn|LINE|L1	24211	NM_001107853	312251	Rn.18604	NM_001107853	ENSRNOG00000006001	Luc7l2	-	LUC7-like 2 pre-mRNA splicing factor	protein-coding
MACS_peak_9492	chr7	110893665	110893961	+	21.53	NA	Intergenic	L1_Rat1|LINE|L1	861995	NM_022249	64015	Rn.229046	NM_022249	ENSRNOG00000009539	Khdrbs3	Etle|Slm2	KH RNA binding domain containing, signal transduction associated 3	protein-coding
MACS_peak_4599	chr18	56737250	56737540	+	21.51	NA	Intergenic	L1_Rat1|LINE|L1	-9210	NM_176075	291567	Rn.163382	NM_176075	ENSRNOG00000017503	Ppargc1b	PGC1beta|Perc	PPARG coactivator 1 beta	protein-coding
MACS_peak_11353	chrY_KL568147v1_random	255413	255918	+	21.48	NA	NA	L1_Rn|LINE|L1	NA	NA
MACS_peak_9001	chr7	507091	507372	+	21.48	NA	Intergenic	L1VL4a|LINE|L1	-637771	NM_001109460	685180	Rn.198434	NM_001109460		Stx19	-	syntaxin 19	protein-coding
MACS_peak_9588	chr7	135371664	135371932	+	21.46	NA	Intergenic	L1_Rat1|LINE|L1	-431925	NM_001106791	300177	Rn.61427	NM_001106791	ENSRNOG00000005965	Irak4	-	interleukin-1 receptor-associated kinase 4	protein-coding
MACS_peak_2973	chr14	46608848	46609142	+	21.45	NA	intron (NM_147136, intron 1 of 5)	intron (NM_147136, intron 1 of 5)	-27935	NM_001025002	310926		NM_001025002		LOC310926	Aa1011|Aa1262|Ab2-057|Ac1147	hypothetical protein LOC310926	protein-coding
MACS_peak_2962	chr14	46592727	46593657	+	21.45	NA	intron (NM_147136, intron 1 of 5)	(GAGG)n|Simple_repeat|Simple_repeat	-43738	NM_001025002	310926		NM_001025002		LOC310926	Aa1011|Aa1262|Ab2-057|Ac1147	hypothetical protein LOC310926	protein-coding
MACS_peak_5788	chr2	174378546	174379184	+	21.44	NA	intron (NM_001191567, intron 1 of 16)	L1_Rn|LINE|L1	34497	NM_001191567	310526	Rn.24186	NM_001191567	ENSRNOG00000024213	Golim4	Golph4	golgi integral membrane protein 4	protein-coding
MACS_peak_4437	chr18	20520816	20521017	+	21.43	NA	Intergenic	Intergenic	-1245643	NM_001287621	102547344		NM_001287621	ENSRNOG00000030156	LOC102547344	LRRGT00172	lateral signaling target protein 2 homolog	protein-coding
MACS_peak_1607	chr10	60123302	60123907	+	21.4	NA	intron (NM_001000026, intron 1 of 1)	RatSatRep2|Unknown|Unknown	3098	NM_001000943	405285	Rn.142095	NM_001000943		Olr1474	-	olfactory receptor 1474	protein-coding
MACS_peak_3619	chr15	93641805	93642090	+	21.38	NA	intron (NM_001191689, intron 3 of 3)	L1_Rat1|LINE|L1	7132	NM_001191689	306128	Rn.55942	NM_001191689		Cln5	-	CLN5, intracellular trafficking protein	protein-coding
MACS_peak_5352	chr2	69758114	69758544	+	21.38	NA	Intergenic	RatSatRep2|Unknown|Unknown	342935	NM_001168631	29181	Rn.83592	NM_001168631	ENSRNOG00000009771	Cdh10	-	cadherin 10	protein-coding
MACS_peak_8817	chr6	101993042	101993289	+	21.38	NA	intron (NM_001108034, intron 3 of 13)	L1_Rat1|LINE|L1	22707	NM_001108034	314259	Rn.224696	NM_001108034	ENSRNOG00000008788	Mpp5	-	membrane palmitoylated protein 5	protein-coding
MACS_peak_11057	chrX	106172589	106172810	+	21.38	NA	Intergenic	Intergenic	-106472	NM_001037216	501621	Rn.24735	NM_001037216	ENSRNOG00000023256	Nxf7	-	nuclear RNA export factor 7	protein-coding
MACS_peak_7806	chr5	7998770	7998978	+	21.38	NA	Intergenic	L1_Rn|LINE|L1	-123965	NM_001107899	312912	Rn.229579	NM_001107899	ENSRNOG00000005391	Prex2	Depdc2	phosphatidylinositol-3,4,5-trisphosphate-dependent Rac exchange factor 2	protein-coding
MACS_peak_4725	chr19	5830297	5831281	+	21.37	NA	Intergenic	Intergenic	-201146	NM_053393	84408	Rn.214220	NM_053393	ENSRNOG00000056643	Cdh8	-	cadherin 8	protein-coding
MACS_peak_8598	chr6	46133850	46134106	+	21.34	NA	Intergenic	L1_Rat1|LINE|L1	449961	NM_001108017	314004	Rn.100440	NM_001108017	ENSRNOG00000007690	Cmpk2	Tyki	cytidine/uridine monophosphate kinase 2	protein-coding
MACS_peak_5566	chr2	122180343	122181272	+	21.34	NA	Intergenic	RatSatRep2|Unknown|Unknown	339665	NM_001107668	310324	Rn.116073	NM_001107668	ENSRNOG00000012734	Dcun1d1	Tes3	defective in cullin neddylation 1 domain containing 1	protein-coding
MACS_peak_4302	chr17	69936293	69936719	+	21.34	NA	Intergenic	L1_Rn|LINE|L1	-23654	NM_001080208	498791	Rn.141298	NM_001080208	ENSRNOG00000017759	Ucn3	RGD1562213	urocortin 3	protein-coding
MACS_peak_5681	chr2	152411678	152411960	+	21.33	NA	Intergenic	RNHAL1|LINE|L1	412728	NM_001107678	310461	Rn.2744	NM_001107678	ENSRNOG00000014599	Dhx36	-	DEAH-box helicase 36	protein-coding
MACS_peak_7590	chr4	127667257	127667624	+	21.33	NA	intron (NM_001100750, intron 8 of 10)	L1_Rn|LINE|L1	157530	NM_001100750	362404	Rn.234329	NM_001100750	ENSRNOG00000005686	Suclg2	-	succinate-CoA ligase, GDP-forming, beta subunit	protein-coding
MACS_peak_376	chr1	63549229	63549556	+	21.33	NA	intron (NM_001099471, intron 4 of 5)	RatSatRep2|Unknown|Unknown	22402	NM_001099471	292531	Rn.217922	NM_001099471	ENSRNOG00000009146	Vom2r26	Gm1961	vomeronasal 2 receptor, 26	protein-coding
MACS_peak_8011	chr5	62980430	62980764	+	21.33	NA	Intergenic	L1_Rn|LINE|L1	-75484	NM_012775	29591	Rn.44402	NM_012775	ENSRNOG00000007036	Tgfbr1	Alk5|Skr4|Tgfr-1|tbetaR-I	transforming growth factor, beta receptor 1	protein-coding
MACS_peak_1180	chr1	226810693	226811012	+	21.29	NA	Intergenic	RatSatRep2|Unknown|Unknown	-18991	NM_019295	54236	Rn.11337	NM_019295	ENSRNOG00000020872	Cd5	-	Cd5 molecule	protein-coding
MACS_peak_7769	chr4	180138943	180139288	+	21.28	NA	Intergenic	Intergenic	76316	NM_001191753	312846	Rn.228969	NM_001191753	ENSRNOG00000015986	Rassf8	RGD1308820	Ras association domain family member 8	protein-coding
MACS_peak_11106	chrX	118161978	118163034	+	21.28	NA	intron (NM_012765, intron 2 of 5)	RatSatRep2|Unknown|Unknown	-27706	NR_106693	102465159		NR_106693	ENSRNOG00000041538	Mir1298	rno-mir-1298	microRNA 1298	ncRNA
MACS_peak_6511	chr3	36399213	36399523	+	21.28	NA	Intergenic	RatSatRep2|Unknown|Unknown	226366	NM_001047951	499796	Rn.116980	NM_001047951	ENSRNOG00000028112	LOC499796	-	LRRGT00012	protein-coding
MACS_peak_1481	chr10	23544034	23544388	+	21.28	NA	Intergenic	RatSatRep2|Unknown|Unknown	-116802	NM_053820	116543	Rn.11257	NM_053820	ENSRNOG00000028845	Ebf1	Ebf|Olf1	early B-cell factor 1	protein-coding
MACS_peak_25	chr1	6126672	6127366	+	21.28	NA	Intergenic	RNHAL1|LINE|L1	678061	NM_001276762	114005	Rn.121954	NM_001276762	ENSRNOG00000040242	Epm2a	-	EPM2A, laforin glucan phosphatase	protein-coding
MACS_peak_1826	chr11	3827894	3828150	+	21.28	NA	Intergenic	RatSatRep2|Unknown|Unknown	569313	NM_001047102	360687	Rn.202778	NM_001047102	ENSRNOG00000030840	Cadm2	Igsf4d|Necl-3|SynCAM 2	cell adhesion molecule 2	protein-coding
MACS_peak_5136	chr2	11565699	11565953	+	21.28	NA	Intergenic	L1_Rat1|LINE|L1	-318845	NR_031813	100313995		NR_031813		Mir9-2	Mir9a-2|rno-mir-9-2|rno-mir-9a-2	microRNA 9-2	ncRNA
MACS_peak_119	chr1	22687249	22687669	+	21.28	NA	Intergenic	L1_Rn|LINE|L1	-26083	NM_001109136	498992	Rn.145522	NM_001109136	ENSRNOG00000039865	Vnn3	RGD1560609	vanin 3	protein-coding
MACS_peak_6722	chr3	93155914	93156171	+	21.28	NA	Intergenic	L1_Rat1|LINE|L1	60374	NM_001106493	295965	Rn.220252	NM_001106493	ENSRNOG00000007484	Ehf	-	ets homologous factor	protein-coding
MACS_peak_3383	chr15	27626814	27627621	+	21.27	NA	Intergenic	RatSatRep2|Unknown|Unknown	26055	NM_001000835	405124	Rn.142439	NM_001000835	ENSRNOG00000053992	Olr1633	-	olfactory receptor 1633	protein-coding
MACS_peak_7966	chr5	52185802	52186039	+	21.27	NA	Intergenic	RNHAL1|LINE|L1	275804	NR_032756	100314210		NR_032756	ENSRNOG00000041320	Mir876	rno-mir-876	microRNA 876	ncRNA
MACS_peak_6746	chr3	97363658	97364126	+	21.27	NA	intron (NM_001114621, intron 5 of 20)	RatSatRep2|Unknown|Unknown	107011	NM_001114621	295980	Rn.230109	NM_001114621	ENSRNOG00000022178	Dcdc5	RGD1562221	doublecortin domain containing 5	protein-coding
MACS_peak_8048	chr5	71575278	71575673	+	21.27	NA	Intergenic	L1_Rn|LINE|L1	-528229	NM_001025275	298012	Rn.67042	NM_001025275	ENSRNOG00000016137	Rad23b	-	RAD23 homolog B, nucleotide excision repair protein	protein-coding
MACS_peak_4474	chr18	30682576	30683099	+	21.25	NA	Intergenic	RatSatRep2|Unknown|Unknown	92564	NM_001106152	291640	Rn.218546	NM_001106152	ENSRNOG00000027359	Slc25a2	-	solute carrier family 25 member 2	protein-coding
MACS_peak_10201	chr9	18483350	18483575	+	21.18	NA	Intergenic	(TGG)n|Simple_repeat|Simple_repeat	-5822	NM_001109479	685722	Rn.136265	NM_001109479	ENSRNOG00000020166	Znrd1as	Znrd1-as1|Znrd1asp	zinc ribbon domain containing 1 antisense	protein-coding
MACS_peak_6220	chr20	11878319	11878733	+	21.18	NA	intron (NM_001008307, intron 2 of 5)	RatSatRep2|Unknown|Unknown	15381	NM_001008307	294333	Rn.22122	NM_001008307	ENSRNOG00000001225	Fam207a	RGD1311257	family with sequence similarity 207, member A	protein-coding
MACS_peak_9849	chr8	65071214	65071478	+	21.18	NA	Intergenic	Intergenic	498098	NM_134335	171296	Rn.88901	NM_134335	ENSRNOG00000011619	Myo9a	-	myosin IXA	protein-coding
MACS_peak_10421	chr9	83288333	83288645	+	21.18	NA	Intergenic	RNHAL1|LINE|L1	-35031	NM_001162411	316539	Rn.6202	NM_001162411	ENSRNOG00000013213	Epha4	RGD1560587	Eph receptor A4	protein-coding
MACS_peak_5963	chr2	222385046	222385287	+	21.18	NA	intron (NM_031027, intron 13 of 21)	RatSatRep2|Unknown|Unknown	561474	NM_031027	81656	Rn.158382	NM_031027		Dpyd	-	dihydropyrimidine dehydrogenase	protein-coding
MACS_peak_8496	chr6	20897920	20898142	+	21.18	NA	Intergenic	L1_Rat1|LINE|L1	-153296	NM_001014073	313873	Rn.12770	NM_001014073	ENSRNOG00000030328	Fam98a	RGD1305486	family with sequence similarity 98, member A	protein-coding
MACS_peak_1986	chr11	49483461	49483754	+	21.18	NA	Intergenic	L1_Rn|LINE|L1	225499	NM_001329881	498072	Rn.2874	NM_001329881	ENSRNOG00000033321	Hmgb2l1	HMG2|RGD1564519	high mobility group box 2-like 1	protein-coding
MACS_peak_4377	chr18	2723975	2724785	+	21.18	NA	Intergenic	L1_Rn|LINE|L1	308559	NM_019185	29300	Rn.8701	NM_019185	ENSRNOG00000023433	Gata6	-	GATA binding protein 6	protein-coding
MACS_peak_507	chr1	86810584	86811036	+	21.16	NA	Intergenic	Intergenic	-61998	NM_001110491	499114	Rn.105566	NM_001110491		Fbxo27	RGD1563982	F-box protein 27	protein-coding
MACS_peak_13	chr1	4078163	4078484	+	21.15	NA	Intergenic	L1_Rat1|LINE|L1	-66812	NM_030843	81022	Rn.96029	NM_030843	ENSRNOG00000013351	Stxbp5	-	syntaxin binding protein 5	protein-coding
MACS_peak_5536	chr2	112371649	112372916	+	21.15	NA	Intergenic	RatSatRep2|Unknown|Unknown	459194	NM_001108547	361921	Rn.168292	NM_001108547	ENSRNOG00000024365	Ect2	-	epithelial cell transforming 2	protein-coding
MACS_peak_1210	chr1	231176209	231176529	+	21.13	NA	Intergenic	L1_Rn|LINE|L1	354417	NM_019141	25565	Rn.53972	NM_019141	ENSRNOG00000013239	Tle4	Esp2|Grg-4	transducin-like enhancer of split 4	protein-coding
MACS_peak_10092	chr9	549009	549208	+	21.13	NA	Intergenic	Intergenic	501120	NM_001106879	301168	Rn.163039	NM_001106879	ENSRNOG00000012618	Efhb	RGD1566407	EF hand domain family, member B	protein-coding
MACS_peak_1055	chr1	201820312	201820855	+	21.11	NA	Intergenic	RatSatRep2|Unknown|Unknown	74387	NM_054005	117179	Rn.10825	NM_054005	ENSRNOG00000029945	Cuzd1	ERG1|Itmap1|UO-44|Uo|Utczp	CUB and zona pellucida-like domains 1	protein-coding
MACS_peak_2772	chr13	112853066	112853321	+	21.03	NA	Intergenic	RatSatRep2|Unknown|Unknown	-520376	NM_001105988	289392	Rn.205178	NM_001105988	ENSRNOG00000007324	Plxna2	-	plexin A2	protein-coding
MACS_peak_11031	chrX	99467041	99467595	+	21.02	NA	Intergenic	RatSatRep2|Unknown|Unknown	2392608	NM_001106968	302776	Rn.218606	NM_001106968	ENSRNOG00000042823	RGD1561230	-	similar to RIKEN cDNA 4921511C20 gene	protein-coding
MACS_peak_7261	chr4	54528580	54528837	+	21.02	NA	intron (NM_022202, intron 8 of 9)	L1_Rn|LINE|L1	653757	NR_032747	100314270		NR_032747	ENSRNOG00000036461	Mir592	rno-mir-592	microRNA 592	ncRNA
MACS_peak_3434	chr15	39921323	39921616	+	21.01	NA	Intergenic	L1_Rat1|LINE|L1	-23626	NM_001191936	498528	Rn.115175	NM_001191936	ENSRNOG00000012521	Shisa2	RGD1561256|Tmem46	shisa family member 2	protein-coding
MACS_peak_2198	chr12	9547074	9547828	+	20.98	NA	Intergenic	Intergenic	-46240	NM_022852	29535	Rn.54603	NM_022852	ENSRNOG00000046458	Pdx1	Idx1|Ipf1|Stf1	pancreatic and duodenal homeobox 1	protein-coding
MACS_peak_8824	chr6	103356067	103356358	+	20.97	NA	Intergenic	RatSatRep2|Unknown|Unknown	-43138	NM_017172	29344	Rn.6142	NM_017172	ENSRNOG00000058646	Zfp36l1	Berg36|Brf1|ERF1|TIS11b|cMG1	zinc finger protein 36, C3H type-like 1	protein-coding
MACS_peak_2459	chr13	24851459	24851891	+	20.97	NA	intron (NM_001012748, intron 1 of 10)	RatSatRep2|Unknown|Unknown	5195	NM_001012748	363948	Rn.62576	NM_001012748	ENSRNOG00000014556	Cdh20	Cad20	cadherin 20	protein-coding
MACS_peak_4885	chr19	28920862	28921121	+	20.95	NA	Intergenic	Intergenic	-1058164	NM_001014221	363337	Rn.198445	NM_001014221	ENSRNOG00000042971	LOC363337	-	similar to RIKEN cDNA 1700081O22	protein-coding
MACS_peak_1370	chr1	271685303	271685722	+	20.95	NA	Intergenic	RatSatRep2|Unknown|Unknown	-409537	NR_037378	100526598		NR_037378	ENSRNOG00000048300	Mir3584	Mir3584-1|rno-mir-3584|rno-mir-3584-1	microRNA 3584	ncRNA
MACS_peak_9334	chr7	69781334	69781976	+	20.95	NA	Intergenic	RNHAL1|LINE|L1	417000	NM_001134466	299828	Rn.61651	NM_001134466	ENSRNOG00000045629	Atp23	Xrcc6bp1	ATP23 metallopeptidase and ATP synthase assembly factor homolog	protein-coding
MACS_peak_3929	chr16	66331423	66331854	+	20.95	NA	Intergenic	RNNICER2-int|LTR|ERV1	-716454	NM_001107319	306534	Rn.231130	NM_001107319	ENSRNOG00000011858	Unc5d	-	unc-5 netrin receptor D	protein-coding
MACS_peak_8165	chr5	107133272	107133652	+	20.95	NA	Intergenic	RatSatRep2|Unknown|Unknown	-73053	NR_031845	100314232		NR_031845		Mir31	Mir31a|rno-mir-31|rno-mir-31a	microRNA 31	ncRNA
MACS_peak_9215	chr7	35158139	35158861	+	20.95	NA	intron (NM_001106781, intron 3 of 3)	RatSatRep2|Unknown|Unknown	32984	NM_001106781	299739	Rn.86466	NM_001106781	ENSRNOG00000007407	Ndufa12	RGD1311462	NADH:ubiquinone oxidoreductase subunit A12	protein-coding
MACS_peak_7345	chr4	71380190	71380833	+	20.95	NA	intron (NM_133292, intron 2 of 3)	RatSatRep2|Unknown|Unknown	3976	NM_133292	680174	Rn.220735	NM_133292	ENSRNOG00000025519	Sval1	SLP-C	seminal vesicle antigen-like 1	protein-coding
MACS_peak_9988	chr8	103511004	103511411	+	20.95	NA	intron (NM_053558, intron 8 of 12)	RatSatRep2|Unknown|Unknown	43174	NM_053558	89821	Rn.88592	NM_053558	ENSRNOG00000054902	Trpc1	Trrp1	transient receptor potential cation channel, subfamily C, member 1	protein-coding
MACS_peak_1323	chr1	260080686	260081147	+	20.95	NA	Intergenic	L1_Rn|LINE|L1	-12006	NM_001106369	294053	Rn.50277	NM_001106369	ENSRNOG00000048973	Ccnj	-	cyclin J	protein-coding
MACS_peak_3809	chr16	34324540	34324977	+	20.93	NA	Intergenic	RatSatRep2|Unknown|Unknown	-229208	NM_001135756	361142	Rn.214629	NM_001135756		Galntl6	Galnt17|RGD1564773	polypeptide N-acetylgalactosaminyltransferase-like 6	protein-coding
MACS_peak_3488	chr15	54511189	54511423	+	20.93	NA	intron (NM_001107278, intron 1 of 22)	L1_Rn|LINE|L1	17174	NM_001107278	306022		NM_001107278	ENSRNOG00000014478	Fndc3a	Fndc3	fibronectin type III domain containing 3a	protein-coding
MACS_peak_10599	chrUn_KL568381v1	28181	28396	+	20.93	NA	NA	Intergenic	NA	NA
MACS_peak_6848	chr3	127546322	127546775	+	20.92	NA	intron (NM_001100529, intron 2 of 7)	RatSatRep2|Unknown|Unknown	22545	NM_001100529	296182	Rn.12542	NM_001100529	ENSRNOG00000024852	Tmx4	RGD1305146|Txndc13	thioredoxin-related transmembrane protein 4	protein-coding
MACS_peak_1398	chr1	282728718	282729148	+	20.91	NA	Intergenic	RNHAL1|LINE|L1	34025	NM_001271303	100910144	Rn.14535	NM_001271303	ENSRNOG00000036571	Ces2	-	carboxylesterase 2	protein-coding
MACS_peak_2847	chr14	19099833	19100630	+	20.91	NA	intron (NM_172320, intron 4 of 13)	RNHAL1|LINE|L1	31938	NM_172320	282708	Rn.214035	NM_172320	ENSRNOG00000002878	Afm	-	afamin	protein-coding
MACS_peak_140	chr1	24964755	24965066	+	20.91	NA	Intergenic	RLTR11A|LTR|ERVK	-208179	NM_001108459	361459	Rn.230112	NM_001108459		Clvs2	Clavesin-2|RGD1306801|Rlbp1l2	clavesin 2	protein-coding
MACS_peak_8442	chr6	3411461	3411880	+	20.9	NA	intron (NM_133407, intron 1 of 32)	RatSatRep2|Unknown|Unknown	32849	NM_133407	170920	Rn.93345	NM_133407	ENSRNOG00000007172	Map4k3	-	mitogen-activated protein kinase kinase kinase kinase 3	protein-coding
MACS_peak_5407	chr2	78651741	78651983	+	20.9	NA	Intergenic	RatSatRep2|Unknown|Unknown	-173235	NM_001101828	499558	Rn.206431	NM_001101828	ENSRNOG00000024461	2019-03-11	MARCH-XI|RGD1559945	membrane associated ring-CH-type finger 11	protein-coding
MACS_peak_4022	chr16	89073300	89073578	+	20.87	NA	Intergenic	L1_Rat1|LINE|L1	-1251758	NM_017222	29500	Rn.85891	NM_017222	ENSRNOG00000037753	Slc10a2	ASBT|IBAT|ISBAT|ISBT	solute carrier family 10 member 2	protein-coding
MACS_peak_2533	chr13	34687653	34687961	+	20.87	NA	Intergenic	Intergenic	77118	NM_001107170	304741	Rn.233953	NM_001107170	ENSRNOG00000002414	Tfcp2l1	Tcfcp2l1	transcription factor CP2-like 1	protein-coding
MACS_peak_5840	chr2	189516129	189516470	+	20.87	NA	intron (NM_001191900, intron 16 of 39)	RNNICER2-int|LTR|ERV1	56981	NM_053597	94266	Rn.144623	NM_053597	ENSRNOG00000016961	Rps27	-	ribosomal protein S27	protein-coding
MACS_peak_7491	chr4	99394925	99395195	+	20.87	NA	Intergenic	RatSatRep2|Unknown|Unknown	-4160	NM_053438	84508	Rn.45685	NM_053438	ENSRNOG00000007272	Rnf103	Adrg34|Kf1|Zfp103	ring finger protein 103	protein-coding
MACS_peak_3883	chr16	53868402	53868790	+	20.87	NA	Intergenic	L1_Rn|LINE|L1	-89262	NM_001290133	686103		NM_001290133	ENSRNOG00000009846	Frg1	-	FSHD region gene 1	protein-coding
MACS_peak_178	chr1	34933504	34934006	+	20.87	NA	Intergenic	L1_Rn|LINE|L1	1022843	NM_001107331	306659	Rn.46018	NM_001107331	ENSRNOG00000033609	Irx1	-	iroquois homeobox 1	protein-coding
MACS_peak_9004	chr7	732845	733336	+	20.85	NA	Intergenic	CpG	-411912	NM_001109460	685180	Rn.198434	NM_001109460		Stx19	-	syntaxin 19	protein-coding
MACS_peak_6683	chr3	83809985	83810267	+	20.83	NA	Intergenic	RNHAL1|LINE|L1	-474166	NM_001127379	362170	Rn.103083	NM_001127379	ENSRNOG00000009689	Api5	-	apoptosis inhibitor 5	protein-coding
MACS_peak_5518	chr2	107751014	107751255	+	20.82	NA	Intergenic	L1_Rn|LINE|L1	518080	NM_001108941	365755	Rn.140831	NM_001108941	ENSRNOG00000011216	Tbl1xr1	RGD1560053	transducin (beta)-like 1 X-linked receptor 1	protein-coding
MACS_peak_10811	chrX	38771807	38772102	+	20.82	NA	Intergenic	L1_Rn|LINE|L1	-304132	NM_001289778	317508	Rn.231886	NM_001289778	ENSRNOG00000005176	Map7d2	Brelin|Mtap7d2|RGD1564852	MAP7 domain containing 2	protein-coding
MACS_peak_10761	chrX	29104470	29104702	+	20.82	NA	Intergenic	RatSatRep2|Unknown|Unknown	-326245	NM_001108254	317470	Rn.21946	NM_001108254	ENSRNOG00000004275	Egfl6	-	EGF-like-domain, multiple 6	protein-coding
MACS_peak_5053	chr2	2901727	2902471	+	20.82	NA	Intergenic	RNHAL1|LINE|L1	-11040	NM_001047917	365619	Rn.202360	NM_001047917	ENSRNOG00000026937	Arsk	RGD1310182	arylsulfatase family, member K	protein-coding
MACS_peak_366	chr1	63259452	63259756	+	20.82	NA	Intergenic	L1_Rn|LINE|L1	312190	NM_001099471	292531	Rn.217922	NM_001099471	ENSRNOG00000009146	Vom2r26	Gm1961	vomeronasal 2 receptor, 26	protein-coding
MACS_peak_10496	chr9	101992803	101993029	+	20.82	NA	Intergenic	L1_Rn|LINE|L1	-604097	NM_001015019	316643	Rn.108412	NM_001015019	ENSRNOG00000051180	Chchd2	-	coiled-coil-helix-coiled-coil-helix domain containing 2	protein-coding
MACS_peak_6801	chr3	113712046	113712305	+	20.82	NA	Intergenic	L1_Rat1|LINE|L1	-106474	NM_001271283	362204	Rn.55346	NM_001271283	ENSRNOG00000016357	Casc4	RGD1305985	cancer susceptibility 4	protein-coding
MACS_peak_2509	chr13	33534946	33535149	+	20.81	NA	Intergenic	ISAT_RN|Satellite|Satellite	716603	NM_021762	60381	Rn.156195	NM_021762	ENSRNOG00000002319	Tsn	-	translin	protein-coding
MACS_peak_10926	chrX	61900365	61900898	+	20.8	NA	Intergenic	L1_Rn|LINE|L1	-463126	NM_001100174	317268	Rn.22484	NM_001100174	ENSRNOG00000053562	Arx	RGD1562672	aristaless related homeobox	protein-coding
MACS_peak_4803	chr19	26337639	26337843	+	20.8	NA	Intergenic	Intergenic	140904	NM_199404	361378	Rn.102840	NM_199404	ENSRNOG00000023910	Man2b1	Manb	mannosidase, alpha, class 2B, member 1	protein-coding
MACS_peak_392	chr1	63980836	63981180	+	20.8	NA	Intergenic	RatSatRep2|Unknown|Unknown	-24789	NM_001313924	683463	Rn.225038	NM_001313924	ENSRNOG00000053260	Lilrb3a	Lilrb3l	leukocyte immunoglobulin-like receptor, subfamily B (with TM and ITIM domains), member 3A	protein-coding
MACS_peak_9161	chr7	22331004	22331244	+	20.79	NA	Intergenic	SATI_RN|Satellite|Satellite	612035	NM_001099484	503127	Rn.217634	NM_001099484		Vom2r56	RGD1559561	vomeronasal 2 receptor, 56	protein-coding
MACS_peak_5553	chr2	116950561	116951043	+	20.79	NA	intron (NM_001107663, intron 4 of 11)	L1_Rn|LINE|L1	83155	NR_032312	100314268		NR_032312	ENSRNOG00000036429	Mir551b	rno-mir-551b	microRNA 551b	ncRNA
MACS_peak_256	chr1	53645164	53645849	+	20.78	NA	Intergenic	Intergenic	-82496	NM_001169136	292311	Rn.222431	NM_001169136	ENSRNOG00000033901	Ttll2	-	tubulin tyrosine ligase like 2	protein-coding
MACS_peak_6048	chr2	246708870	246709120	+	20.74	NA	Intergenic	RatSatRep2|Unknown|Unknown	29002	NM_053994	117098	Rn.11126	NM_053994	ENSRNOG00000016223	Pdha2	Pdhal	pyruvate dehydrogenase E1 alpha 2 subunit	protein-coding
MACS_peak_5496	chr2	101882877	101883219	+	20.74	NA	Intergenic	L1_Rn|LINE|L1	-428555	NR_031867	100314024		NR_031867	ENSRNOG00000035499	Mir124-2	rno-mir-124-2	microRNA 124-2	ncRNA
MACS_peak_2952	chr14	46548374	46548675	+	20.73	NA	Intergenic	Intergenic	-88406	NM_001025002	310926		NM_001025002		LOC310926	Aa1011|Aa1262|Ab2-057|Ac1147	hypothetical protein LOC310926	protein-coding
MACS_peak_7359	chr4	74903187	74903401	+	20.72	NA	Intergenic	L1_Rn|LINE|L1	-1729115	NM_001134994	680668	Rn.215836	NM_001134994	ENSRNOG00000029922	Tpk1	-	thiamin pyrophosphokinase 1	protein-coding
MACS_peak_8027	chr5	67670093	67670327	+	20.72	NA	Intergenic	RatSatRep2|Unknown|Unknown	315098	NM_201271	298062	Rn.215023	NM_201271	ENSRNOG00000007575	Plppr1	Lppr1|Prg-3	phospholipid phosphatase related 1	protein-coding
MACS_peak_8950	chr6	138199263	138199761	+	20.72	NA	Intergenic	Intergenic	202192	NM_001012146	360742	Rn.6726	NM_001012146	ENSRNOG00000061814	Dgcr2	-	DiGeorge syndrome critical region gene 2	protein-coding
MACS_peak_5068	chr2	4624128	4624790	+	20.72	NA	Intergenic	L1_Rn|LINE|L1	-175906	NM_001000193	293353	Rn.141805	NM_001000193	ENSRNOG00000049967	Olr206	-	olfactory receptor 206	protein-coding
MACS_peak_1931	chr11	36598249	36598755	+	20.72	NA	Intergenic	RatSatRep2|Unknown|Unknown	43086	NM_001127682	498066	Rn.4128	NM_001127682	ENSRNOG00000028238	Sh3bgr	RGD1563599	SH3 domain binding glutamate-rich protein	protein-coding
MACS_peak_1310	chr1	256051260	256051629	+	20.71	NA	intron (NM_001169112, intron 8 of 21)	L1_Rn|LINE|L1	15578	NM_001169112	171304	Rn.58850	NM_001169112	ENSRNOG00000056069	Kif11	Knsl1	kinesin family member 11	protein-coding
MACS_peak_5908	chr2	208794650	208794968	+	20.71	NA	intron (NM_207586, intron 10 of 12)	L1_Rn|LINE|L1	44455	NM_207586	113901	Rn.43692	NM_207586	ENSRNOG00000033162	Chia	-	chitinase, acidic	protein-coding
MACS_peak_5721	chr2	157842422	157842726	+	20.71	NA	Intergenic	L1_Rat1|LINE|L1	-82736	NM_053662	114121	Rn.12962	NM_053662	ENSRNOG00000011586	Ccnl1	Ania-6a|Ccnl	cyclin L1	protein-coding
MACS_peak_4202	chr17	45163574	45163840	+	20.71	NA	Intergenic	RatSatRep2|Unknown|Unknown	-11547	NM_001029913	291165	Rn.104854	NM_001029913	ENSRNOG00000056708	Nkapl	RGD1311667	NFKB activating protein-like	protein-coding
MACS_peak_2471	chr13	27558129	27558437	+	20.71	NA	Intergenic	L1_Rn|LINE|L1	92247	NM_153733	266775	Rn.59484	NM_153733	ENSRNOG00000002417	Serpinb10	Trespin	serpin family B member 10	protein-coding
MACS_peak_3016	chr14	48016313	48016539	+	20.68	NA	Intergenic	ISAT_RN|Satellite|Satellite	-153303	NM_001271306	686295	Rn.3259	NM_001271306	ENSRNOG00000048441	Wdr82	-	WD repeat domain 82	protein-coding
MACS_peak_2100	chr11	81860767	81861144	+	20.67	NA	Intergenic	L1_Rn|LINE|L1	64064	NM_001109553	689897	Rn.198271	NM_001109553	ENSRNOG00000038355	Crygs	-	crystallin, gamma S	protein-coding
MACS_peak_7292	chr4	59943558	59943876	+	20.67	NA	Intergenic	RNHAL1|LINE|L1	414845	NM_001106588	296966	Rn.106389	NM_001106588	ENSRNOG00000013211	Chchd3	-	coiled-coil-helix-coiled-coil-helix domain containing 3	protein-coding
MACS_peak_1926	chr11	35326607	35327034	+	20.67	NA	Intergenic	Intergenic	-64458	NM_013192	25743	Rn.10185	NM_013192	ENSRNOG00000001658	Kcnj6	-	potassium voltage-gated channel subfamily J member 6	protein-coding
MACS_peak_10058	chr8	124814915	124815206	+	20.67	NA	Intergenic	L1_Rat1|LINE|L1	-416196	NM_031132	81810	Rn.9954	NM_031132	ENSRNOG00000013265	Tgfbr2	TGF-beta 2|Tgfbr2T	transforming growth factor, beta receptor 2	protein-coding
MACS_peak_6503	chr3	33697444	33698075	+	20.67	NA	intron (NM_001108581, intron 2 of 13)	L1_Rn|LINE|L1	56143	NM_001108581	362132	Rn.23462	NM_001108581	ENSRNOG00000029447	Epc2	-	enhancer of polycomb homolog 2	protein-coding
MACS_peak_1034	chr1	196222052	196222340	+	20.67	NA	Intergenic	L1_Rn|LINE|L1	-515431	NM_001145762	100271845	Rn.222094	NM_001145762	ENSRNOG00000042706	LOC100271845	-	hypothetical protein LOC100271845	protein-coding
MACS_peak_9938	chr8	90749055	90749402	+	20.67	NA	Intergenic	L1_Rat1|LINE|L1	-84674	NM_001201355	113990	Rn.106652	NM_001007020	ENSRNOG00000031032	Hmgn3	-	high mobility group nucleosomal binding domain 3	protein-coding
MACS_peak_929	chr1	181074926	181075216	+	20.66	NA	Intergenic	SATI_RN|Satellite|Satellite	-2064814	NM_001013434	365355	Rn.3271	NM_001013434	ENSRNOG00000012258	Rras2	-	RAS related 2	protein-coding
MACS_peak_10181	chr9	12587046	12587279	+	20.64	NA	Intergenic	Intergenic	-46828	NM_001109414	680486	Rn.136288	NM_001109414	ENSRNOG00000023474	Dazl	-	deleted in azoospermia-like	protein-coding
MACS_peak_2584	chr13	49554608	49554883	+	20.64	NA	Intergenic	Intergenic	-32330	NM_001160314	116690	Rn.3048	NM_053909	ENSRNOG00000030515	Nfasc	NF	neurofascin	protein-coding
MACS_peak_9814	chr8	56083162	56083506	+	20.61	NA	Intergenic	RatSatRep2|Unknown|Unknown	-96482	NM_213629	367085	Rn.20805	NM_213629	ENSRNOG00000025624	Arhgap20	RARhoGAP	Rho GTPase activating protein 20	protein-coding
MACS_peak_8640	chr6	57718190	57718436	+	20.6	NA	intron (NM_019304, intron 4 of 26)	L1_Rn|LINE|L1	201301	NM_019304	54248	Rn.11413	NM_019304	ENSRNOG00000030771	Dgkb	Dagk	diacylglycerol kinase, beta	protein-coding
MACS_peak_6800	chr3	113586845	113587200	+	20.59	NA	Intergenic	RatSatRep2|Unknown|Unknown	-141587	NM_001191964	499878	Rn.93042	NM_001191964	ENSRNOG00000014436	Mfap1a	RGD1562232	microfibrillar-associated protein 1A	protein-coding
MACS_peak_5613	chr2	134765069	134765666	+	20.58	NA	Intergenic	RatSatRep2|Unknown|Unknown	-3428769	NM_001134511	295019	Rn.46896	NM_001134511	ENSRNOG00000011239	RGD1307595	-	similar to RIKEN cDNA 1700018B24	protein-coding
MACS_peak_188	chr1	37112520	37113021	+	20.58	NA	intron (NM_031007, intron 2 of 23)	RatSatRep2|Unknown|Unknown	69697	NM_031007	81636	Rn.10731	NM_031007	ENSRNOG00000032150	Adcy2	AC2	adenylate cyclase 2	protein-coding
MACS_peak_1364	chr1	268016865	268017266	+	20.57	NA	intron (NM_001106367, intron 1 of 26)	L1_Rn|LINE|L1	30760	NM_001106367	294043	Rn.46999	NM_001106367	ENSRNOG00000028832	Sorcs3	-	sortilin-related VPS10 domain containing receptor 3	protein-coding
MACS_peak_1761	chr10	99301749	99302055	+	20.56	NA	Intergenic	L1_Rn|LINE|L1	-86228	NM_053314	29719	Rn.1989	NM_053314	ENSRNOG00000004713	Kcnj16	Kir5.1	potassium voltage-gated channel subfamily J member 16	protein-coding
MACS_peak_3610	chr15	90440449	90440658	+	20.54	NA	Intergenic	L1_Rn|LINE|L1	75948	NM_001106056	290458	Rn.218506	NM_001106056	ENSRNOG00000024509	Trim52	RGD1565615	tripartite motif-containing 52	protein-coding
MACS_peak_10502	chr9	103509450	103509701	+	20.54	NA	Intergenic	L1_Rat1|LINE|L1	-302421	NM_053914	116696	Rn.234502	NM_053914	ENSRNOG00000019128	St8sia4	Siat8d	ST8 alpha-N-acetyl-neuraminide alpha-2,8-sialyltransferase 4	protein-coding
MACS_peak_4545	chr18	47288990	47289199	+	20.54	NA	Intergenic	RNHAL1|LINE|L1	-5198	NM_001106136	291470	Rn.218703	NM_001106136	ENSRNOG00000014988	Ftmt	-	ferritin mitochondrial	protein-coding
MACS_peak_8768	chr6	87233092	87233410	+	20.54	NA	Intergenic	L1_Rat2|LINE|L1	-308951	NM_001109531	689296	Rn.178359	NM_001109531	ENSRNOG00000023093	Mis18bp1	RGD1305497	MIS18 binding protein 1	protein-coding
MACS_peak_649	chr1	133585836	133586577	+	20.54	NA	Intergenic	RAL_Rn-int|LTR|ERV1	-83053	NM_001191625	308742	Rn.220729	NM_001191625	ENSRNOG00000009932	Mctp2	RGD1562967	multiple C2 and transmembrane domain containing 2	protein-coding
MACS_peak_5543	chr2	115034330	115034649	+	20.54	NA	Intergenic	L1_Rn|LINE|L1	-39855	NM_001000517	315571	Rn.85601	NM_001000517	ENSRNOG00000050953	Olr1280	-	olfactory receptor 1280	protein-coding
MACS_peak_9947	chr8	92732371	92732754	+	20.54	NA	Intergenic	L1_Rn|LINE|L1	209663	NM_001106844	300870	Rn.788	NM_001106844	ENSRNOG00000010240	Fam46a	RGD1311381	family with sequence similarity 46, member A	protein-coding
MACS_peak_1817	chr11	16732	17256	+	20.54	NA	Intergenic	L1_Rat1|LINE|L1	765960	NM_031564	29210	Rn.10713	NM_031564	ENSRNOG00000030285	Epha3	-	Eph receptor A3	protein-coding
MACS_peak_3691	chr16	9288394	9288618	+	20.54	NA	Intergenic	(TGG)n|Simple_repeat|Simple_repeat	52618	NM_001013999	306278	Rn.159999	NM_001013999	ENSRNOG00000020080	Lrrc18	RGD1311738	leucine rich repeat containing 18	protein-coding
MACS_peak_1217	chr1	232635372	232635696	+	20.54	NA	Intergenic	Intergenic	510407	NM_198738	293820	Rn.100813	NM_198738	ENSRNOG00000013971	Psat1	Psa1	phosphoserine aminotransferase 1	protein-coding
MACS_peak_1276	chr1	249474873	249475129	+	20.49	NA	intron (NM_001105731, intron 3 of 16)	L1_Rat1|LINE|L1	-99953	NM_001107586	309338	Rn.1661	NM_001107586	ENSRNOG00000050289	Cstf2t	-	cleavage stimulation factor subunit 2, tau variant	protein-coding
MACS_peak_3617	chr15	92435041	92435241	+	20.48	NA	Intergenic	RatSatRep2|Unknown|Unknown	872279	NM_001107283	306147	Rn.31034	NM_001107283	ENSRNOG00000009209	Slitrk1	-	SLIT and NTRK-like family, member 1	protein-coding
MACS_peak_11422	chrY_KL568155v1_random	1073139	1073352	+	20.48	NA	NA	RatSatRep2|Unknown|Unknown	NA	NA
MACS_peak_7442	chr4	88574102	88574419	+	20.48	NA	Intergenic	L1_Rat1|LINE|L1	-9147	NM_001014187	362375	Rn.104463	NM_001014187	ENSRNOG00000006810	Lancl2	-	LanC like 2	protein-coding
MACS_peak_6368	chr20	54562851	54563074	+	20.48	NA	Intergenic	RatSatRep2|Unknown|Unknown	-45271	NM_019309	54257	Rn.87696	NM_019309	ENSRNOG00000000368	Grik2	GluK2|GluR6	glutamate ionotropic receptor kainate type subunit 2	protein-coding
MACS_peak_10290	chr9	48972696	48973135	+	20.47	NA	Intergenic	RatSatRep2|Unknown|Unknown	502409	NR_132639	102547353	Rn.24665	NR_132639		Linc01158	Pantr1|linc-Brn1a	long intergenic non-protein coding RNA 1158	ncRNA
MACS_peak_9479	chr7	105924793	105925038	+	20.47	NA	Intergenic	RatSatRep2|Unknown|Unknown	-332111	NM_017142	29241	Rn.10382	NM_017142	ENSRNOG00000004890	Adcy8	Ac8	adenylate cyclase 8	protein-coding
MACS_peak_4881	chr19	28902668	28902903	+	20.44	NA	Intergenic	Intergenic	-1039958	NM_001014221	363337	Rn.198445	NM_001014221	ENSRNOG00000042971	LOC363337	-	similar to RIKEN cDNA 1700081O22	protein-coding
MACS_peak_8729	chr6	79117942	79118523	+	20.44	NA	Intergenic	RatSatRep2|Unknown|Unknown	-136107	NM_012719	25033	Rn.42915	NM_012719	ENSRNOG00000048145	Sstr1	Gpcrrna	somatostatin receptor 1	protein-coding
MACS_peak_8970	chr6	142372188	142372421	+	20.42	NA	Intergenic	L1_Rn|LINE|L1	-1528990	NM_019620	25165	Rn.10663	NM_019620	ENSRNOG00000004268	Zfp386	Kzf1|Znf386	zinc finger protein 386 (Kruppel-like)	protein-coding
MACS_peak_7050	chr4	8117592	8117941	+	20.42	NA	intron (NM_001106575, intron 1 of 14)	(TGCCTC)n|Simple_repeat|Simple_repeat	51029	NM_001106575	296753	Rn.138055	NM_001106575	ENSRNOG00000010601	Srpk2	-	SRSF protein kinase 2	protein-coding
MACS_peak_1265	chr1	247219201	247219426	+	20.42	NA	Intergenic	(CTT)n|Simple_repeat|Simple_repeat	-32418	NM_001013152	309301	Rn.22496	NM_001013152	ENSRNOG00000015491	Rcl1	Ab1-353|Ac1292	RNA terminal phosphate cyclase-like 1	protein-coding
MACS_peak_7132	chr4	29042937	29043573	+	20.42	NA	Intergenic	(ACCACCACC)n|Simple_repeat|Simple_repeat	49383	NM_019251	29631	Rn.3953	NM_019251	ENSRNOG00000011008	Bet1	-	Bet1 golgi vesicular membrane trafficking protein	protein-coding
MACS_peak_7680	chr4	156394809	156395036	+	20.42	NA	Intergenic	L1_Rat1|LINE|L1	33572	NM_001170584	312703	Rn.14316	NM_001170584	ENSRNOG00000049203	Pex5	PTS1-BP|PTS1R	peroxisomal biogenesis factor 5	protein-coding
MACS_peak_9915	chr8	85912530	85912970	+	20.42	NA	intron (NM_001009713, intron 4 of 10)	(ACC)n|Simple_repeat|Simple_repeat	13662	NM_001009713	363103	Rn.74591	NM_001009713	ENSRNOG00000009330	Slc17a5	-	solute carrier family 17 member 5	protein-coding
MACS_peak_6440	chr3	12734679	12734882	+	20.42	NA	Intergenic	(TG)n|Simple_repeat|Simple_repeat	-47843	NM_053709	114501	Rn.92364	NM_053709	ENSRNOG00000017019	Lmx1b	-	LIM homeobox transcription factor 1 beta	protein-coding
MACS_peak_6330	chr20	44204590	44205160	+	20.42	NA	Intergenic	CpG	15827	NM_001134695	100188933	Rn.47244	NM_001134695	ENSRNOG00000024918	Fam229b	-	family with sequence similarity 229, member B	protein-coding
MACS_peak_8745	chr6	82382045	82382279	+	20.42	NA	Intergenic	L1_Rn|LINE|L1	-701578	NM_001108024	314164	Rn.224998	NM_001108024	ENSRNOG00000005550	Lrfn5	-	leucine rich repeat and fibronectin type III domain containing 5	protein-coding
MACS_peak_5991	chr2	230785398	230785617	+	20.42	NA	Intergenic	(TCT)n|Simple_repeat|Simple_repeat	-115619	NM_012519	24246	Rn.87208	NM_012519	ENSRNOG00000011589	Camk2d	CAMK1|Camk2|Camki|RATCAMKI	calcium/calmodulin-dependent protein kinase II delta	protein-coding
MACS_peak_10716	chrX	18091863	18092295	+	20.42	NA	Intergenic	Intergenic	-127191	NM_001127657	317395	Rn.203523	NM_001127657	ENSRNOG00000031286	Spin2a	RGD1560898|Spin2	spindlin family, member 2A	protein-coding
MACS_peak_225	chr1	44888570	44888833	+	20.42	NA	Intergenic	(TGG)n|Simple_repeat|Simple_repeat	-272941	NM_001004216	292279	Rn.161761	NM_001004216	ENSRNOG00000016490	Nox3	-	NADPH oxidase 3	protein-coding
MACS_peak_6112	chr20	462141	462671	+	20.42	NA	Intergenic	RNHAL1|LINE|L1	11165	NM_001000893	405194	Rn.142697	NM_001000893		Olr1678	-	olfactory receptor 1678	protein-coding
MACS_peak_76	chr1	12910021	12910551	+	20.42	NA	Intergenic	RNNICER3-int|LTR|ERV1	-5495	NM_001135859	308622	Rn.165855	NM_001135859	ENSRNOG00000060021	Txlnb	RGD1307979	taxilin beta	protein-coding
MACS_peak_497	chr1	85453890	85454180	+	20.42	NA	intron (NM_001107497, intron 11 of 29)	(CTGCCT)n|Simple_repeat|Simple_repeat	16255	NM_001107497	308472	Rn.100021	NM_001107497	ENSRNOG00000032034	Supt5h	-	SPT5 homolog, DSIF elongation factor subunit	protein-coding
MACS_peak_5008	chr19	61946115	61946333	+	20.42	NA	Intergenic	L1_Rat1|LINE|L1	268682	NM_017022	24511	Rn.25733	NM_017022	ENSRNOG00000010966	Itgb1	-	integrin subunit beta 1	protein-coding
MACS_peak_365	chr1	63144285	63144560	+	20.42	NA	Intergenic	RNHAL1|LINE|L1	307401	NM_001099655	690691	Rn.198000	NM_001099655	ENSRNOG00000054736	Vom2r16	-	vomeronasal 2 receptor, 16	protein-coding
MACS_peak_8306	chr5	149842122	149842422	+	20.42	NA	Intergenic	Intergenic	154062	NM_001191575	116680	Rn.35625	NM_001191575	ENSRNOG00000013515	Ptpru	-	protein tyrosine phosphatase, receptor type, U	protein-coding
MACS_peak_8380	chr5	162105639	162105887	+	20.42	NA	Intergenic	RNNICER3-int|LTR|ERV1	-55165	NM_001109617	691051	Rn.218408	NM_001109617		Pramef27	Pramel1	PRAME family member 27	protein-coding
MACS_peak_1698	chr10	84304217	84304420	+	20.42	NA	Intergenic	(GAA)n|Simple_repeat|Simple_repeat	-5112	NM_173311	286975	Rn.35285	NM_173311	ENSRNOG00000023881	Skap1	Scap1|Skap55	src kinase associated phosphoprotein 1	protein-coding
MACS_peak_606	chr1	114703165	114703401	+	20.38	NA	intron (NM_001271493, intron 2 of 23)	RAL_Rn-int|LTR|ERV1	41313	NM_001271493	100365773	Rn.165558	NM_001271493	ENSRNOG00000014465	LOC100365773	Oca2|p	pink-eyed dilution-like	protein-coding
MACS_peak_5659	chr2	146892553	146892816	+	20.38	NA	Intergenic	RatSatRep2|Unknown|Unknown	499378	NM_001106434	295061	Rn.24712	NM_001106434	ENSRNOG00000015812	Tm4sf1	-	transmembrane 4 L six family member 1	protein-coding
MACS_peak_2177	chr12	3968128	3968425	+	20.38	NA	Intergenic	L1_Rn|LINE|L1	-1217	NM_001099466	288396	Rn.195584	NM_001099466	ENSRNOG00000045674	Vom2r59	RGD1566381	vomeronasal 2 receptor, 59	protein-coding
MACS_peak_10764	chrX	29859181	29859457	+	20.38	NA	Intergenic	RatSatRep2|Unknown|Unknown	-33880	NM_001007756	363462	Rn.18700	NM_001007756	ENSRNOG00000029038	Gemin8	Fam51a1	gem (nuclear organelle) associated protein 8	protein-coding
MACS_peak_10344	chr9	61949376	61949786	+	20.38	NA	intron (NM_001113370, intron 6 of 9)	L1_Rn|LINE|L1	26059	NM_001113370	501143	Rn.145717	NM_001113370	ENSRNOG00000054379	Boll	RGD1559527	boule homolog, RNA binding protein	protein-coding
MACS_peak_5110	chr2	8391982	8392199	+	20.38	NA	Intergenic	L1_Rn|LINE|L1	-341077	NM_001007797	309945	Rn.161886	NM_001007797	ENSRNOG00000045649	Arrdc3	LRRGT00048	arrestin domain containing 3	protein-coding
MACS_peak_8029	chr5	68040179	68040447	+	20.38	NA	Intergenic	L1_Rat1|LINE|L1	-55005	NM_201271	298062	Rn.215023	NM_201271	ENSRNOG00000007575	Plppr1	Lppr1|Prg-3	phospholipid phosphatase related 1	protein-coding
MACS_peak_6574	chr3	57248161	57248405	+	20.38	NA	Intergenic	(TGGGAG)n|Simple_repeat|Simple_repeat	-144253	NM_001107734	311118	Rn.6114	NM_001107734	ENSRNOG00000060572	Tlk1	-	tousled-like kinase 1	protein-coding
MACS_peak_10213	chr9	22665681	22666332	+	20.34	NA	Intergenic	RatSatRep2|Unknown|Unknown	-686265	NM_001014215	363198	Rn.155071	NM_001014215		Cenpq	-	centromere protein Q	protein-coding
MACS_peak_5962	chr2	222199371	222199668	+	20.34	NA	intron (NM_031027, intron 10 of 21)	L1_Rn|LINE|L1	375827	NM_031027	81656	Rn.158382	NM_031027		Dpyd	-	dihydropyrimidine dehydrogenase	protein-coding
MACS_peak_7154	chr4	32176509	32176768	+	20.34	NA	Intergenic	RatSatRep2|Unknown|Unknown	-89038	NM_001126090	680532	Rn.8472	NM_001126090	ENSRNOG00000010420	Sem1	Dss1|Shfm1	SEM1, 26S proteasome complex subunit	protein-coding
MACS_peak_9376	chr7	77890197	77890636	+	20.34	NA	Intergenic	L1_Rat1|LINE|L1	-8906	NM_001130536	282581	Rn.2740	NM_001130536	ENSRNOG00000004660	Fzd6	-	frizzled class receptor 6	protein-coding
MACS_peak_6936	chr3	156181695	156181947	+	20.34	NA	Intergenic	L1_Rn|LINE|L1	159092	NM_019316	54264	Rn.10725	NM_019316	ENSRNOG00000016037	Mafb	Krml|b-maf	MAF bZIP transcription factor B	protein-coding
MACS_peak_11159	chrX	130714922	130715506	+	20.3	NA	Intergenic	L1_Rn|LINE|L1	628639	NM_001107941	313296	Rn.24270	NM_001107941		Dcaf12l1	Dcaf12|RGD1563873|Wdr40b	DDB1 and CUL4 associated factor 12-like 1	protein-coding
MACS_peak_4861	chr19	28304962	28305400	+	20.3	NA	Intergenic	L1_Rn|LINE|L1	-442354	NM_001014221	363337	Rn.198445	NM_001014221	ENSRNOG00000042971	LOC363337	-	similar to RIKEN cDNA 1700081O22	protein-coding
MACS_peak_4605	chr18	58428102	58428379	+	20.3	NA	Intergenic	L1_Rn|LINE|L1	102921	NM_001107384	307382	Rn.24090	NM_001107384	ENSRNOG00000018914	Napg	-	NSF attachment protein gamma	protein-coding
MACS_peak_10931	chrX	63745193	63745436	+	20.3	NA	Intergenic	RatSatRep2|Unknown|Unknown	64401	NM_053409	84469	Rn.54596	NM_053409	ENSRNOG00000006756	Maged1	Nrage	MAGE family member D1	protein-coding
MACS_peak_8462	chr6	8720025	8720431	+	20.25	NA	intron (NM_001134463, intron 9 of 10)	intron (NM_001134463, intron 9 of 10)	-166506	NM_023990	78974	Rn.123641	NM_023990		Six3	-	SIX homeobox 3	protein-coding
MACS_peak_10452	chr9	90455101	90455571	+	20.23	NA	Intergenic	RNHAL1|LINE|L1	-425278	NM_001039015	301563	Rn.93479	NM_001039015	ENSRNOG00000048016	Mff	RGD1310230	mitochondrial fission factor	protein-coding
MACS_peak_8567	chr6	34822973	34823230	+	20.23	NA	Intergenic	RatSatRep2|Unknown|Unknown	-267715	NM_024351	24468	Rn.120392	NM_024351	ENSRNOG00000034066	Hspa8	Hsc70	heat shock protein family A (Hsp70) member 8	protein-coding
MACS_peak_7398	chr4	82446205	82446547	+	20.22	NA	Intergenic	L1_Rn|LINE|L1	75379	NM_001191972	103690342	Rn.145628	NM_001191972	ENSRNOG00000053106	Evx1	RGD1565788	even-skipped homeobox 1	protein-coding
MACS_peak_6316	chr20	41068278	41068880	+	20.21	NA	Intergenic	RatSatRep2|Unknown|Unknown	-14738	NM_001013033	29544	Rn.99721	NM_001013033	ENSRNOG00000000549	Tspyl1	Al8|Tspyl	TSPY-like 1	protein-coding
MACS_peak_310	chr1	55657945	55658834	+	20.19	NA	Intergenic	Intergenic	237247	NM_001099465	685666	Rn.217930	NM_001099465	ENSRNOG00000013671	Vom2r9	RGD1564755	vomeronasal 2 receptor, 9	protein-coding
MACS_peak_11536	chrY_KL568162v1_random	2851325	2851557	+	20.18	NA	NA	RatSatRep2|Unknown|Unknown	NA	NA
MACS_peak_8894	chr6	122950482	122950698	+	20.18	NA	intron (NM_001106752, intron 6 of 11)	L1_Rat1|LINE|L1	30273	NM_001106752	299246	Rn.14768	NM_001106752	ENSRNOG00000004542	Ttc8	-	tetratricopeptide repeat domain 8	protein-coding
MACS_peak_7239	chr4	51354981	51355205	+	20.18	NA	Intergenic	L1_Rn|LINE|L1	-155616	NM_031651	58980	Rn.9699	NM_031651	ENSRNOG00000008121	Slc13a1	-	solute carrier family 13 member 1	protein-coding
MACS_peak_10642	chrX	2340037	2340510	+	20.18	NA	Intergenic	(AGAGGC)n|Simple_repeat|Simple_repeat	-95032	NM_001108242	317170	Rn.218517	NM_001108242	ENSRNOG00000004150	Slc9a7	Nhe7	solute carrier family 9 member A7	protein-coding
MACS_peak_3555	chr15	72810751	72811103	+	20.18	NA	Intergenic	L1_Rn|LINE|L1	-1031894	NM_001107280	306081	Rn.99314	NM_001107280	ENSRNOG00000013306	Pcdh20	-	protocadherin 20	protein-coding
MACS_peak_2658	chr13	71861194	71861535	+	20.18	NA	Intergenic	RNHAL1|LINE|L1	506623	NM_019294	54234	Rn.10742	NM_019294	ENSRNOG00000002863	Cacna1e	CACHA1E|Cav2.3	calcium voltage-gated channel subunit alpha1 E	protein-coding
MACS_peak_7069	chr4	14332152	14332613	+	20.18	NA	intron (NM_001106578, intron 14 of 16)	L1_Rn|LINE|L1	118819	NM_001109218	499985	Rn.225150	NM_001109218	ENSRNOG00000040108	RGD1565355	-	similar to fatty acid translocase/CD36	protein-coding
MACS_peak_10411	chr9	80721208	80721631	+	20.18	NA	Intergenic	L1_Rat1|LINE|L1	-24063	NR_110639	287004	Rn.69588	NR_110636		LOC287004	GB.7|Pinc	Mg1 protein	ncRNA
MACS_peak_10706	chrX	14954966	14955437	+	20.18	NA	Intergenic	(CTC)n|Simple_repeat|Simple_repeat	17466	NM_138854	192208	Rn.81033	NM_138854	ENSRNOG00000027767	Slc38a5	SN2	solute carrier family 38, member 5	protein-coding
MACS_peak_985	chr1	186510960	186511200	+	20.18	NA	Intergenic	RatSatRep2|Unknown|Unknown	837903	NM_001024751	293165	Rn.76073	NM_001024751	ENSRNOG00000020514	Sox6	-	SRY box 6	protein-coding
MACS_peak_1611	chr10	60668131	60668335	+	20.18	NA	intron (NM_001000942, intron 1 of 1)	RNHAL1|LINE|L1	17336	NM_001000942	405281	Rn.142083	NM_001000942		Olr1500	-	olfactory receptor 1500	protein-coding
MACS_peak_3213	chr14	97563422	97563650	+	20.18	NA	Intergenic	L1_Rn|LINE|L1	2217428	NM_001135020	689134	Rn.1965	NM_001135020	ENSRNOG00000005203	Sec61g	-	Sec61 translocon gamma subunit	protein-coding
MACS_peak_5060	chr2	3573011	3573388	+	20.17	NA	Intergenic	RatSatRep2|Unknown|Unknown	622620	NM_001106400	294601	Rn.99144	NM_001106400	ENSRNOG00000040279	Slf1	Ankrd32	SMC5-SMC6 complex localization factor 1	protein-coding
MACS_peak_11396	chrY_KL568151v1_random	417531	417956	+	20.16	NA	NA	(TTCTTC)n|Simple_repeat|Simple_repeat	NA	NA
MACS_peak_5563	chr2	120683332	120683763	+	20.16	NA	Intergenic	RatSatRep2|Unknown|Unknown	-113194	NM_001012179	361927	Rn.40468	NM_001012179		Fxr1	Fxr1h	FMR1 autosomal homolog 1	protein-coding
MACS_peak_9817	chr8	57115418	57115856	+	20.16	NA	Intergenic	L1_Rn|LINE|L1	139626	NM_001103354	100125362	Rn.18127	NM_001103354	ENSRNOG00000025463	LOC100125362	-	hypothetical protein LOC100125362	protein-coding
MACS_peak_2839	chr14	16195629	16195912	+	20.16	NA	Intergenic	RatSatRep2|Unknown|Unknown	80298	NM_001105725	29157	Rn.162246	NM_001105725	ENSRNOG00000002089	Ccng2	-	cyclin G2	protein-coding
MACS_peak_7677	chr4	156132278	156132548	+	20.16	NA	Intergenic	RatSatRep2|Unknown|Unknown	24691	NM_001005896	450222	Rn.129075	NM_001005896	ENSRNOG00000027655	Clec4b2	Aplra1	C-type lectin domain family 4, member B2	protein-coding
MACS_peak_8778	chr6	88515506	88515941	+	20.14	NA	intron (NM_199269, intron 10 of 15)	L1_Rn|LINE|L1	776304	NM_199269	314180	Rn.205097	NM_199269	ENSRNOG00000000618	Mdga2	Mamdc1	MAM domain containing glycosylphosphatidylinositol anchor 2	protein-coding
MACS_peak_10438	chr9	87341618	87341848	+	20.14	NA	Intergenic	L1_Rn|LINE|L1	744755	NM_012969	25467	Rn.10476	NM_012969	ENSRNOG00000014597	Irs1	IRS1IRM	insulin receptor substrate 1	protein-coding
MACS_peak_11526	chrY_KL568162v1_random	1074701	1075084	+	20.14	NA	NA	RatSatRep2|Unknown|Unknown	NA	NA
MACS_peak_7444	chr4	89246627	89247302	+	20.11	NA	intron (NM_001100862, intron 2 of 17)	RatSatRep2|Unknown|Unknown	34258	NM_001100862	362378	Rn.47690	NM_001100862	ENSRNOG00000007947	Fam13a	Fam13a1|RGD1309807	family with sequence similarity 13, member A	protein-coding
MACS_peak_1114	chr1	216046733	216046957	+	20.1	NA	Intergenic	L1_Rn|LINE|L1	33442	NM_012740	25085	Rn.11082	NM_012740	ENSRNOG00000020410	Th	The	tyrosine hydroxylase	protein-coding
MACS_peak_7523	chr4	108880071	108880523	+	20.09	NA	intron (NM_001106598, intron 2 of 18)	RatSatRep2|Unknown|Unknown	162366	NM_001106598	297357	Rn.214082	NM_001106598	ENSRNOG00000006003	Ctnna2	Catna2	catenin alpha 2	protein-coding
MACS_peak_3939	chr16	67970289	67970537	+	20.09	NA	Intergenic	RNHAL1|LINE|L1	-615822	NM_001100944	290818	Rn.144145	NM_001100944	ENSRNOG00000022181	RGD1562638	Smok	similar to MAP/microtubule affinity-regulating kinase 3	protein-coding
MACS_peak_5916	chr2	210104094	210104326	+	20.09	NA	Intergenic	L1_Rn|LINE|L1	58917	NM_001013913	295356	Rn.72489	NM_001013913	ENSRNOG00000018131	Slc16a4	-	solute carrier family 16, member 4	protein-coding
MACS_peak_4186	chr17	43759223	43759583	+	20.09	NA	Intergenic	Intergenic	-19771	NM_001107354	306970	Rn.199026	NM_001107354		Hist1h2an	-	histone cluster 1, H2an	protein-coding
MACS_peak_1282	chr1	251676824	251677151	+	20.09	NA	Intergenic	L1_Rn|LINE|L1	255173	NM_031606	50557	Rn.22158	NM_031606	ENSRNOG00000020723	Pten	MMAC1|Mmac|TEP1	phosphatase and tensin homolog	protein-coding
MACS_peak_10990	chrX	85388012	85388310	+	20.05	NA	Intergenic	L1_Rn|LINE|L1	-566386	NM_017067	24942	Rn.10191	NM_017067	ENSRNOG00000000161	Chm	-	CHM, Rab escort protein 1	protein-coding
MACS_peak_7725	chr4	167434693	167434916	+	20.05	NA	intron (NM_181440, intron 3 of 5)	L1_Rat1|LINE|L1	14893	NM_181440	192266	Rn.10942	NM_181440		Grpca	Grp-Ca|Grpca_m	glutamine/glutamic acid-rich protein A	protein-coding
MACS_peak_10831	chrX	41681811	41682051	+	19.98	NA	Intergenic	L1_Rat1|LINE|L1	-876981	NM_001191734	317517	Rn.231432	NM_001191734	ENSRNOG00000003675	Ptchd1	RGD1564527	patched domain containing 1	protein-coding
MACS_peak_7383	chr4	78006752	78007140	+	19.98	NA	Intergenic	L1_Rat1|LINE|L1	68535	NM_001024327	500110	Rn.27249	NM_001024327	ENSRNOG00000007707	Zfp467	Znf467	zinc finger protein 467	protein-coding
MACS_peak_9593	chr7	136678241	136678562	+	19.98	NA	intron (NM_031070, intron 13 of 20)	L1_Rn|LINE|L1	175419	NM_031070	81734	Rn.11567	NM_031070	ENSRNOG00000006235	Nell2	-	neural EGFL like 2	protein-coding
MACS_peak_697	chr1	145317544	145317860	+	19.98	NA	Intergenic	RatSatRep2|Unknown|Unknown	-398267	NM_001170432	293065	Rn.138440	NM_001170432	ENSRNOG00000025088	Tmc3	-	transmembrane channel-like 3	protein-coding
MACS_peak_11132	chrX	123744479	123744732	+	19.98	NA	Intergenic	L1_Rn|LINE|L1	-6591	NM_001024872	298342	Rn.12473	NM_001024872		Nkap	2610020o08rik	NFKB activating protein	protein-coding
MACS_peak_6166	chr20	4773409	4773641	+	19.96	NA	intron (NM_001008840, intron 3 of 6)	intron (NM_001008840, intron 3 of 6)	1361	NM_001008840	414779	Rn.120283	NM_001008840		RT1-CE2	RT1-C/E2	RT1 class I, locus CE2	protein-coding
MACS_peak_277	chr1	54418373	54418646	+	19.96	NA	Intergenic	Intergenic	-198160	NM_001099463	685557	Rn.217943	NM_001099463		Vom2r7	-	vomeronasal 2 receptor, 7	protein-coding
MACS_peak_628	chr1	124271582	124271894	+	19.96	NA	Intergenic	L1_Rn|LINE|L1	-205426	NM_001276434	100910616	Rn.6393	NM_001276434	ENSRNOG00000049192	Hmgn5	Nsbp1	high mobility group nucleosome binding domain 5	protein-coding
MACS_peak_309	chr1	55657115	55657319	+	19.96	NA	Intergenic	Intergenic	238419	NM_001099465	685666	Rn.217930	NM_001099465	ENSRNOG00000013671	Vom2r9	RGD1564755	vomeronasal 2 receptor, 9	protein-coding
MACS_peak_326	chr1	55770441	55770695	+	19.94	NA	Intergenic	Intergenic	125068	NM_001099465	685666	Rn.217930	NM_001099465	ENSRNOG00000013671	Vom2r9	RGD1564755	vomeronasal 2 receptor, 9	protein-coding
MACS_peak_10516	chr9	105924879	105925290	+	19.92	NA	Intergenic	Intergenic	-231727	NM_001109010	367323	Rn.44072	NM_001109010	ENSRNOG00000022576	Nudt12	-	nudix hydrolase 12	protein-coding
MACS_peak_1886	chr11	22168403	22168757	+	19.92	NA	Intergenic	L1_Rn|LINE|L1	889876	NM_001000057	288810	Rn.138130	NM_001000057	ENSRNOG00000054865	Olr901	ratchr7-3457136-3458080_ORF	olfactory receptor 901	protein-coding
MACS_peak_6349	chr20	50536228	50536834	+	19.92	NA	Intergenic	NICER2_Rn|LTR|ERV1	96646	NM_001077590	365603	Rn.41396	NM_001077590		Bves	Popdc1	blood vessel epicardial substance	protein-coding
MACS_peak_5321	chr2	61675988	61676207	+	19.92	NA	Intergenic	L1_Rat1|LINE|L1	21910	NM_001047942	499541	Rn.115979	NM_001047942	ENSRNOG00000030171	LOC499541	-	LRRGT00045	protein-coding
MACS_peak_6658	chr3	78421597	78422063	+	19.89	NA	Intergenic	RatSatRep2|Unknown|Unknown	7753	NM_001000570	366112	Rn.142808	NM_001000570	ENSRNOG00000034169	Olr705	ratchr3-73835565-73834645_ORF	olfactory receptor 705	protein-coding
MACS_peak_2419	chr13	12672027	12672597	+	19.87	NA	Intergenic	RatSatRep2|Unknown|Unknown	2723305	NM_001329899	304725		NM_001329899	ENSRNOG00000029556	LOC304725	Caspr5-2	similar to contactin associated protein-like 5 isoform 1	protein-coding
MACS_peak_7575	chr4	123229784	123229983	+	19.86	NA	Intergenic	RatSatRep2|Unknown|Unknown	67797	NM_001106611	297455	Rn.203046	NM_001106611	ENSRNOG00000008733	Lsm3	-	LSM3 homolog, U6 small nuclear RNA and mRNA degradation associated	protein-coding
MACS_peak_4260	chr17	57113790	57114243	+	19.8	NA	Intergenic	L1_Rat2|LINE|L1	38798	NM_001271246	25620	Rn.10251	NM_013086	ENSRNOG00000014900	Crem	Icer	cAMP responsive element modulator	protein-coding
MACS_peak_11435	chrY_KL568157v1_random	1158057	1158315	+	19.8	NA	NA	L1_Rn|LINE|L1	NA	NA
MACS_peak_1991	chr11	50375269	50375517	+	19.8	NA	Intergenic	RatSatRep2|Unknown|Unknown	-405734	NM_031753	79559	Rn.5789	NM_031753	ENSRNOG00000001989	Alcam	-	activated leukocyte cell adhesion molecule	protein-coding
MACS_peak_2880	chr14	28247733	28248168	+	19.8	NA	Intergenic	L1_Rn|LINE|L1	608365	NM_130822	170641	Rn.203386	NM_130822	ENSRNOG00000030149	Adgrl3	Cirl3|Lec3|Lphn3	adhesion G protein-coupled receptor L3	protein-coding
MACS_peak_7400	chr4	82452569	82452814	+	19.78	NA	Intergenic	RatSatRep2|Unknown|Unknown	81694	NM_001191972	103690342	Rn.145628	NM_001191972	ENSRNOG00000053106	Evx1	RGD1565788	even-skipped homeobox 1	protein-coding
MACS_peak_8583	chr6	40126611	40127058	+	19.78	NA	Intergenic	RatSatRep2|Unknown|Unknown	-763376	NM_001127299	313969	Rn.21319	NM_001127299	ENSRNOG00000004084	Fam84a	RGD1305779	family with sequence similarity 84, member A	protein-coding
MACS_peak_909	chr1	180927908	180928249	+	19.77	NA	Intergenic	ISAT_RN|Satellite|Satellite	-1917821	NM_001013434	365355	Rn.3271	NM_001013434	ENSRNOG00000012258	Rras2	-	RAS related 2	protein-coding
MACS_peak_8923	chr6	133293316	133293606	+	19.67	NA	Intergenic	L1_Rn|LINE|L1	-283107	NM_053744	114587	Rn.14547	NM_053744	ENSRNOG00000019584	Dlk1	Pref-1|Zog	delta like non-canonical Notch ligand 1	protein-coding
MACS_peak_11428	chrY_KL568156v1_random	1056870	1057237	+	19.67	NA	NA	L1_Rn|LINE|L1	NA	NA
MACS_peak_2855	chr14	20881383	20881603	+	19.67	NA	Intergenic	L1_Rn|LINE|L1	-64905	NM_053424	84484	Rn.8739	NM_053424	ENSRNOG00000003134	Slc4a4	HHNMC|HNBC1|KNBC|NBC2|Nbc1|Nbc4|PNBC|SLC4A5	solute carrier family 4 member 4	protein-coding
MACS_peak_8651	chr6	59556576	59556960	+	19.67	NA	Intergenic	L1_Rn|LINE|L1	393818	NM_019186	29308	Rn.9258	NM_019186	ENSRNOG00000004282	Arl4a	Arl4	ADP-ribosylation factor like GTPase 4A	protein-coding
MACS_peak_6764	chr3	102015616	102016096	+	19.67	NA	Intergenic	L1_Rn|LINE|L1	116730	NM_001044301	690914	Rn.210834	NM_001044301	ENSRNOG00000004703	Muc15	-	mucin 15, cell surface associated	protein-coding
MACS_peak_3343	chr15	19105278	19105628	+	19.67	NA	Intergenic	RatSatRep2|Unknown|Unknown	177300	NM_001014069	313588	Rn.8811	NM_001014069	ENSRNOG00000046920	Snip1	-	Smad nuclear interacting protein 1	protein-coding
MACS_peak_8140	chr5	101190908	101191143	+	19.67	NA	Intergenic	L1_Rn|LINE|L1	-52598	NM_001191757	298185	Rn.198726	NM_001191757	ENSRNOG00000022309	Frem1	RGD1306981	Fras1 related extracellular matrix 1	protein-coding
MACS_peak_289	chr1	55162645	55162850	+	19.67	NA	Intergenic	Intergenic	546078	NM_001099463	685557	Rn.217943	NM_001099463		Vom2r7	-	vomeronasal 2 receptor, 7	protein-coding
MACS_peak_7129	chr4	28761542	28761850	+	19.66	NA	Intergenic	RatSatRep2|Unknown|Unknown	-59137	NM_053816	116506	Rn.10062	NM_053816	ENSRNOG00000010053	Calcr	-	calcitonin receptor	protein-coding
MACS_peak_3969	chr16	75603546	75603806	+	19.64	NA	Intergenic	RatSatRep2|Unknown|Unknown	-4193	NM_001037548	641623	Rn.155416	NM_001037548		Defb3	-	beta-defensin 3	protein-coding
MACS_peak_9385	chr7	81097925	81098142	+	19.64	NA	Intergenic	RatSatRep2|Unknown|Unknown	-89379	NM_001166307	498592		NM_001166307		LOC498592	-	similar to CG32662-PA	protein-coding
MACS_peak_3486	chr15	54282184	54282426	+	19.64	NA	Intergenic	L1_Rn|LINE|L1	246175	NM_001107278	306022		NM_001107278	ENSRNOG00000014478	Fndc3a	Fndc3	fibronectin type III domain containing 3a	protein-coding
MACS_peak_11488	chrY_KL568161v1_random	239806	240240	+	19.64	NA	NA	RatSatRep2|Unknown|Unknown	NA	NA
MACS_peak_3172	chr14	89998630	89998920	+	19.62	NA	Intergenic	RatSatRep2|Unknown|Unknown	614263	NM_001106020	289797	Rn.214144	NM_001106020	ENSRNOG00000025645	Abca13	-	ATP binding cassette subfamily A member 13	protein-coding
MACS_peak_7683	chr4	156636418	156636665	+	19.62	NA	Intergenic	L1_Rn|LINE|L1	-6592	NM_001099503	297590	Rn.107049	NM_001099503		Vom2r52	-	vomeronasal 2 receptor, 52	protein-coding
MACS_peak_5930	chr2	215296558	215296797	+	19.62	NA	Intergenic	RatSatRep2|Unknown|Unknown	75729	NR_045198	100359946	Rn.133155	NR_045198		Hmox2-ps1	HO-3|Hmox3	heme oxygenase (decycling) 2, pseudogene 1	pseudo
MACS_peak_2626	chr13	63070166	63071132	+	19.62	NA	Intergenic	RatSatRep2|Unknown|Unknown	-455837	NM_173121	286901	Rn.64406	NM_173121	ENSRNOG00000002811	Brinp3	Fam5c	BMP/retinoic acid inducible neural specific 3	protein-coding
MACS_peak_6303	chr20	38021464	38021766	+	19.62	NA	Intergenic	RatSatRep2|Unknown|Unknown	144965	NM_012567	24392	Rn.10346	NM_012567	ENSRNOG00000000805	Gja1	Cx43	gap junction protein, alpha 1	protein-coding
MACS_peak_7894	chr5	31196764	31197111	+	19.62	NA	Intergenic	RNNICER2-int|LTR|ERV1	-371482	NM_080776	65205	Rn.208361	NM_080776	ENSRNOG00000005708	Mmp16	Mt3-mmp	matrix metallopeptidase 16	protein-coding
MACS_peak_9227	chr7	37347354	37347939	+	19.6	NA	Intergenic	RatSatRep2|Unknown|Unknown	246232	NM_001108086	314764	Rn.23513	NM_001108086	ENSRNOG00000021681	Eea1	-	early endosome antigen 1	protein-coding
MACS_peak_7804	chr5	7071346	7071925	+	19.57	NA	intron (NM_001109259, intron 9 of 13)	RatSatRep2|Unknown|Unknown	394030	NM_001109259	500390	Rn.207930	NM_001109259	ENSRNOG00000005375	RGD1564053	-	similar to hypothetical protein	protein-coding
MACS_peak_1322	chr1	259914324	259914783	+	19.57	NA	Intergenic	L1_Rn|LINE|L1	-11984	NM_001106369	294053	Rn.50277	NM_001106369	ENSRNOG00000048973	Ccnj	-	cyclin J	protein-coding
MACS_peak_7073	chr4	15319204	15319547	+	19.55	NA	Intergenic	L1_Rn|LINE|L1	185908	NM_017017	24446	Rn.10468	NM_017017	ENSRNOG00000007027	Hgf	HPTA	hepatocyte growth factor	protein-coding
MACS_peak_7678	chr4	156133132	156133537	+	19.55	NA	Intergenic	RatSatRep2|Unknown|Unknown	25612	NM_001005896	450222	Rn.129075	NM_001005896	ENSRNOG00000027655	Clec4b2	Aplra1	C-type lectin domain family 4, member B2	protein-coding
MACS_peak_10976	chrX	78382986	78383187	+	19.55	NA	intron (NM_001106938, intron 1 of 1)	L1_Rn|LINE|L1	10829	NM_001106938	302373	Rn.218681	NM_001106938	ENSRNOG00000032970	Gpr174	RGD1564689	G protein-coupled receptor 174	protein-coding
MACS_peak_9305	chr7	57843393	57843845	+	19.55	NA	Intergenic	RatSatRep2|Unknown|Unknown	-163824	NM_001108991	366894	Rn.23393	NM_001108991	ENSRNOG00000005278	Trhde	PAP-II	thyrotropin-releasing hormone degrading enzyme	protein-coding
MACS_peak_5378	chr2	74221897	74222116	+	19.55	NA	Intergenic	L1_Rat1|LINE|L1	3410620	NM_022300	64160	Rn.37779	NM_022300		Basp1	NAP22	brain abundant, membrane attached signal protein 1	protein-coding
MACS_peak_9319	chr7	63340757	63340985	+	19.54	NA	Intergenic	RatSatRep2|Unknown|Unknown	-126251	NM_001011989	299825	Rn.228654	NM_001011989	ENSRNOG00000047350	Gns	-	glucosamine (N-acetyl)-6-sulfatase	protein-coding
MACS_peak_5627	chr2	138353906	138354314	+	19.54	NA	Intergenic	L1_Rn|LINE|L1	159974	NM_001134511	295019	Rn.46896	NM_001134511	ENSRNOG00000011239	RGD1307595	-	similar to RIKEN cDNA 1700018B24	protein-coding
MACS_peak_8064	chr5	75459579	75460489	+	19.54	NA	intron (NM_031061, intron 7 of 15)	RatSatRep2|Unknown|Unknown	67244	NM_031061	81725	Rn.10210	NM_031061	ENSRNOG00000033567	Musk	Nsk1	muscle associated receptor tyrosine kinase	protein-coding
MACS_peak_6365	chr20	53709036	53709464	+	19.54	NA	Intergenic	L1_Rat1|LINE|L1	808441	NM_019309	54257	Rn.87696	NM_019309	ENSRNOG00000000368	Grik2	GluK2|GluR6	glutamate ionotropic receptor kainate type subunit 2	protein-coding
MACS_peak_3622	chr15	95314619	95314859	+	19.54	NA	Intergenic	RatSatRep2|Unknown|Unknown	199520	NM_001106057	290467	Rn.99063	NM_001106057	ENSRNOG00000022337	Slitrk6	-	SLIT and NTRK-like family, member 6	protein-coding
MACS_peak_7469	chr4	95859597	95860012	+	19.54	NA	Intergenic	L1_Rn|LINE|L1	-24939	NM_001107864	312398	Rn.7758	NM_001107864	ENSRNOG00000006391	Smarcad1	-	SWI/SNF-related, matrix-associated actin-dependent regulator of chromatin, subfamily a, containing DEAD/H box 1	protein-coding
MACS_peak_11278	chrY	1576167	1576802	+	19.54	NA	Intergenic	L1_Rn|LINE|L1	-173062	NM_001329902	103694559		NM_001329902	ENSRNOG00000058664	Usp9y	-	ubiquitin specific peptidase 9, Y-linked	protein-coding
MACS_peak_5383	chr2	75091881	75092527	+	19.54	NA	Intergenic	RatSatRep2|Unknown|Unknown	2540422	NM_022300	64160	Rn.37779	NM_022300		Basp1	NAP22	brain abundant, membrane attached signal protein 1	protein-coding
MACS_peak_7351	chr4	72255399	72255895	+	19.54	NA	Intergenic	RatSatRep2|Unknown|Unknown	15705	NM_001000851	405141	Rn.143115	NM_001000851	ENSRNOG00000032535	Olr807	-	olfactory receptor 807	protein-coding
MACS_peak_5564	chr2	121223541	121223947	+	19.53	NA	Intergenic	L1_Rn|LINE|L1	58607	NM_001109181	499593	Rn.17369	NM_001109181	ENSRNOG00000012199	Sox2	RGD1565646	SRY box 2	protein-coding
MACS_peak_5510	chr2	106286283	106286561	+	19.53	NA	Intergenic	L1_Rat1|LINE|L1	-946632	NM_001108941	365755	Rn.140831	NM_001108941	ENSRNOG00000011216	Tbl1xr1	RGD1560053	transducin (beta)-like 1 X-linked receptor 1	protein-coding
MACS_peak_3278	chr15	2583281	2583635	+	19.53	NA	Intergenic	L1_Rn|LINE|L1	-48071	NM_001107249	305685	Rn.38717	NM_001107249	ENSRNOG00000013968	Comtd1	-	catechol-O-methyltransferase domain containing 1	protein-coding
MACS_peak_10319	chr9	55290042	55290258	+	19.53	NA	Intergenic	L1_Rat1|LINE|L1	-33997	NM_001007712	316384	Rn.203035	NM_001007712	ENSRNOG00000025895	Cavin2	-	caveolae associated protein 2	protein-coding
MACS_peak_5898	chr2	206636374	206636625	+	19.53	NA	intron (NM_139084, intron 1 of 20)	RatSatRep2|Unknown|Unknown	62606	NM_139084	245903	Rn.228785	NM_139084	ENSRNOG00000019885	Magi3	Slipr	membrane associated guanylate kinase, WW and PDZ domain containing 3	protein-coding
MACS_peak_11223	chrX	152457980	152458443	+	19.53	NA	intron (NM_017069, intron 6 of 9)	L1_Rat1|LINE|L1	127392	NR_032739	100314287		NR_032739	ENSRNOG00000059896	Mir105	rno-mir-105	microRNA 105	ncRNA
MACS_peak_1893	chr11	24404579	24405181	+	19.53	NA	Intergenic	RatSatRep2|Unknown|Unknown	110854	NM_001108841	363735	Rn.145253	NM_001108841	ENSRNOG00000053205	Gabpa	Nrf-2alpha|Nrf2a	GA binding protein transcription factor, alpha subunit	protein-coding
MACS_peak_5228	chr2	36061451	36061803	+	19.53	NA	Intergenic	L1_Rn|LINE|L1	-2503	NM_001008874	408235	Rn.142548	NM_001008874	ENSRNOG00000046265	Spink6	Spink5l1	serine peptidase inhibitor, Kazal type 6	protein-coding
MACS_peak_5415	chr2	80436984	80437346	+	19.51	NA	Intergenic	Intergenic	-28493	NM_001037648	310190	Rn.162566	NM_001037648	ENSRNOG00000012109	Otulinl	Fam105a	OTU deubiquitinase with linear linkage specificity like	protein-coding
MACS_peak_2977	chr14	46613488	46613738	+	19.51	NA	intron (NM_147136, intron 1 of 5)	B2_Rat1|SINE|B2	-23317	NM_001025002	310926		NM_001025002		LOC310926	Aa1011|Aa1262|Ab2-057|Ac1147	hypothetical protein LOC310926	protein-coding
MACS_peak_9736	chr8	31452227	31452443	+	19.48	NA	Intergenic	L1_Rn|LINE|L1	-45304	NM_001108131	315478	Rn.8862	NM_001108131	ENSRNOG00000014719	Snx19	-	sorting nexin 19	protein-coding
MACS_peak_10647	chrX	2383970	2384420	+	19.48	NA	Intergenic	(AGAGGC)n|Simple_repeat|Simple_repeat	-51110	NM_001108242	317170	Rn.218517	NM_001108242	ENSRNOG00000004150	Slc9a7	Nhe7	solute carrier family 9 member A7	protein-coding
MACS_peak_4880	chr19	28885056	28885509	+	19.47	NA	Intergenic	Intergenic	-1022455	NM_001014221	363337	Rn.198445	NM_001014221	ENSRNOG00000042971	LOC363337	-	similar to RIKEN cDNA 1700081O22	protein-coding
MACS_peak_757	chr1	157807254	157807676	+	19.45	NA	Intergenic	L1_Rat1|LINE|L1	106376	NM_001106281	293118	Rn.8457	NM_001106281	ENSRNOG00000010630	Prcp	-	prolylcarboxypeptidase	protein-coding
MACS_peak_3447	chr15	43184637	43185098	+	19.45	NA	Intergenic	Intergenic	-114518	NM_017191	29412	Rn.9991	NM_017191	ENSRNOG00000009522	Adra1a	Adra1c	adrenoceptor alpha 1A	protein-coding
MACS_peak_11213	chrX	148402056	148402264	+	19.45	NA	Intergenic	L1_Rn|LINE|L1	-19467	NM_001109322	501655	Rn.126531	NM_001109322	ENSRNOG00000012560	Ctag2	RGD1561702	cancer/testis antigen 2	protein-coding
MACS_peak_8038	chr5	70435795	70436045	+	19.44	NA	Intergenic	RatSatRep2|Unknown|Unknown	-86081	NM_001108667	362520	Rn.224742	NM_001108667	ENSRNOG00000028129	Fktn	Fcmd	fukutin	protein-coding
MACS_peak_3927	chr16	66291737	66292001	+	19.42	NA	Intergenic	Intergenic	-756223	NM_001107319	306534	Rn.231130	NM_001107319	ENSRNOG00000011858	Unc5d	-	unc-5 netrin receptor D	protein-coding
MACS_peak_4937	chr19	36955374	36955677	+	19.38	NA	Intergenic	RatSatRep2|Unknown|Unknown	-69854	NM_001106175	291952	Rn.151252	NM_001106175	ENSRNOG00000013808	Ces2g	Ces2l|RGD1308358	carboxylesterase 2G	protein-coding
MACS_peak_7516	chr4	107040918	107041169	+	19.35	NA	Intergenic	L1_Rn|LINE|L1	-1260086	NM_001109374	679668	Rn.171424	NM_001109374	ENSRNOG00000006093	LRRTM1	-	leucine rich repeat transmembrane neuronal 1	protein-coding
MACS_peak_1953	chr11	40729111	40729310	+	19.35	NA	Intergenic	L1_Rn|LINE|L1	1246802	NM_001013184	360704	Rn.4120	NM_001013184	ENSRNOG00000050978	Hmgn1	-	high mobility group nucleosome binding domain 1	protein-coding
MACS_peak_6904	chr3	144193988	144194247	+	19.35	NA	Intergenic	RatSatRep2|Unknown|Unknown	237651	NM_198685	296234	Rn.214033	NM_198685	ENSRNOG00000030857	Cyss	Cst4	cystatin S	protein-coding
MACS_peak_6097	chr2	264074238	264074495	+	19.35	NA	Intergenic	RNHAL1|LINE|L1	179161	NM_012704	24929	Rn.10361	NM_012704	ENSRNOG00000010325	Ptger3	EP3|EP3R|Rep3|rEP3a|rEP3b	prostaglandin E receptor 3	protein-coding
MACS_peak_9689	chr8	17431459	17431887	+	19.35	NA	intron (NM_001108128, intron 2 of 10)	RatSatRep2|Unknown|Unknown	10121	NM_001108128	315447	Rn.6136	NM_001108128	ENSRNOG00000026643	Chordc1	CHP-1	cysteine and histidine rich domain containing 1	protein-coding
MACS_peak_3065	chr14	62887265	62887706	+	19.35	NA	Intergenic	RatSatRep2|Unknown|Unknown	-208342	NM_031347	83516	Rn.19172	NM_031347	ENSRNOG00000004473	Ppargc1a	Ppargc1	PPARG coactivator 1 alpha	protein-coding
MACS_peak_10332	chr9	59935369	59935603	+	19.35	NA	Intergenic	L1_Rat1|LINE|L1	-86048	NM_001108796	363229		NM_001108796	ENSRNOG00000011677	Slc39a10	-	solute carrier family 39 member 10	protein-coding
MACS_peak_4196	chr17	44612009	44612317	+	19.34	NA	Intergenic	RatSatRep2|Unknown|Unknown	-16840	NM_001162930	502128	Rn.190815	NM_001162930	ENSRNOG00000061510	Pom121l2	-	POM121 transmembrane nucleoporin-like 2	protein-coding
MACS_peak_540	chr1	98148344	98148850	+	19.32	NA	Intergenic	L1_Rn|LINE|L1	338343	NM_001004220	292845	Rn.60152	NM_001004220	ENSRNOG00000017851	Etfb	-	electron transfer flavoprotein beta subunit	protein-coding
MACS_peak_3759	chr16	21899420	21899694	+	19.3	NA	Intergenic	L1_Rat1|LINE|L1	-350943	NM_153470	266711	Rn.3213	NM_153470	ENSRNOG00000011826	Lzts1	Psdzip70	leucine zipper tumor suppressor 1	protein-coding
MACS_peak_11465	chrY_KL568158v1_random	476096	476668	+	19.29	NA	NA	RatSatRep2|Unknown|Unknown	NA	NA
MACS_peak_9745	chr8	34868217	34868824	+	19.27	NA	Intergenic	RatSatRep2|Unknown|Unknown	-824005	NM_001048215	315546	Rn.7602	NM_001048215	ENSRNOG00000009772	Kirrel3	-	kirre like nephrin family adhesion molecule 3	protein-coding
MACS_peak_643	chr1	131312864	131313170	+	19.27	NA	Intergenic	L1_Rn|LINE|L1	141672	NM_080778	113984	Rn.17815	NM_080778	ENSRNOG00000010308	Nr2f2	Tfcoup2	nuclear receptor subfamily 2, group F, member 2	protein-coding
MACS_peak_304	chr1	55646671	55646951	+	19.26	NA	Intergenic	Intergenic	248825	NM_001099465	685666	Rn.217930	NM_001099465	ENSRNOG00000013671	Vom2r9	RGD1564755	vomeronasal 2 receptor, 9	protein-coding
MACS_peak_10922	chrX	61187056	61187494	+	19.26	NA	Intergenic	RatSatRep2|Unknown|Unknown	-35674	NM_001177683	317271	Rn.190323	NM_001177683	ENSRNOG00000022806	Mageb4	RGD1561997	melanoma antigen family B, 4	protein-coding
MACS_peak_1004	chr1	190131283	190131723	+	19.26	NA	intron (NM_001106293, intron 15 of 30)	L1_Rn|LINE|L1	59083	NM_001106293	293442	Rn.228291	NM_001106293	ENSRNOG00000027505	Abca15	-	ATP-binding cassette, subfamily A (ABC1), member 15	protein-coding
MACS_peak_1070	chr1	206192831	206193100	+	19.22	NA	Intergenic	RNHAL1|LINE|L1	224178	NM_001163214	100302465	Rn.162501	NM_001163214	ENSRNOG00000027542	LOC100302465	-	hypothetical LOC100302465	protein-coding
MACS_peak_10814	chrX	38836013	38836242	+	19.22	NA	Intergenic	L1_Rat1|LINE|L1	-368305	NM_001289778	317508	Rn.231886	NM_001289778	ENSRNOG00000005176	Map7d2	Brelin|Mtap7d2|RGD1564852	MAP7 domain containing 2	protein-coding
MACS_peak_3789	chr16	29796585	29796905	+	19.22	NA	Intergenic	RNNICER2-int|LTR|ERV1	122046	NM_001109110	498622	Rn.101584	NM_001109110	ENSRNOG00000014339	Anxa10	RGD1560956	annexin A10	protein-coding
MACS_peak_11479	chrY_KL568160v1_random	688069	688342	+	19.22	NA	NA	L1_Rn|LINE|L1	NA	NA
MACS_peak_9501	chr7	115016522	115016749	+	19.22	NA	Intergenic	(GAGGCA)n|Simple_repeat|Simple_repeat	19532	NM_001114405	362930	Rn.106043	NM_001114405	ENSRNOG00000007628	Ptp4a3	-	protein tyrosine phosphatase type IVA, member 3	protein-coding
MACS_peak_8727	chr6	78733639	78733920	+	19.22	NA	Intergenic	(GGCAGA)n|Simple_repeat|Simple_repeat	-184110	NM_012742	25098	Rn.10470	NM_012742		Foxa1	Hnf3a	forkhead box A1	protein-coding
MACS_peak_4315	chr17	77079847	77080282	+	19.2	NA	Intergenic	RatSatRep2|Unknown|Unknown	-96641	NM_145081	246294	Rn.63435	NM_145081	ENSRNOG00000017941	Optn	Fip2	optineurin	protein-coding
MACS_peak_2388	chr13	1317590	1317900	+	19.2	NA	Intergenic	L1_Rn|LINE|L1	630818	NM_001305281	297865		NM_001305281	ENSRNOG00000032307	Dsel	RGD1307724	dermatan sulfate epimerase-like	protein-coding
MACS_peak_4517	chr18	39949226	39949759	+	19.2	NA	Intergenic	RatSatRep2|Unknown|Unknown	185012	NM_001106147	291597	Rn.137958	NM_001106147	ENSRNOG00000016612	Trim36	-	tripartite motif-containing 36	protein-coding
MACS_peak_1762	chr10	101034134	101034400	+	19.2	NA	Intergenic	RatSatRep2|Unknown|Unknown	-254261	NM_080403	140586	Rn.95086	NM_080403	ENSRNOG00000002607	Sox9	SRY	SRY box 9	protein-coding
MACS_peak_402	chr1	65990697	65991208	+	19.2	NA	intron (NM_001099483, intron 1 of 4)	L1_Rn|LINE|L1	-13397	NM_001099473	292615	Rn.217939	NM_001099473	ENSRNOG00000050831	Vom2r35	RGD1559147	vomeronasal 2 receptor, 35	protein-coding
MACS_peak_2407	chr13	7652183	7652421	+	19.2	NA	Intergenic	RatSatRep2|Unknown|Unknown	1339425	NM_001047866	297846	Rn.234265	NM_001047866	ENSRNOG00000043185	Cntnap5c	Caspr5-4|Cntnap5|Cntnap5d|RGD1566343	contactin associated protein-like 5C	protein-coding
MACS_peak_6117	chr20	679529	679829	+	19.2	NA	Intergenic	L1_Rat1|LINE|L1	30097	NM_001000508	309574	Rn.107054	NM_001000508	ENSRNOG00000046708	Olr1687	-	olfactory receptor 1687	protein-coding
MACS_peak_9218	chr7	35756227	35756584	+	19.2	NA	intron (NM_001014266, intron 1 of 15)	RatSatRep2|Unknown|Unknown	16764	NM_001014266	366872	Rn.45405	NM_001014266	ENSRNOG00000007859	Cep83	Ccdc41|RGD1359593	centrosomal protein 83	protein-coding
MACS_peak_10125	chr9	7263208	7263470	+	19.2	NA	Intergenic	Intergenic	296431	NM_001100888	301155	Rn.214119	NM_001100888	ENSRNOG00000046515	St6gal2	ST6Gal-II|ST6GalII	ST6 beta-galactoside alpha-2,6-sialyltransferase 2	protein-coding
MACS_peak_7842	chr5	16809677	16810090	+	19.19	NA	Intergenic	RatSatRep2|Unknown|Unknown	-10107	NM_001008316	297804	Rn.234443	NM_001008316	ENSRNOG00000008846	Plag1	-	PLAG1 zinc finger	protein-coding
MACS_peak_9142	chr7	20013797	20014239	+	19.19	NA	Intergenic	RatSatRep2|Unknown|Unknown	-925046	NM_001099474	299683	Rn.198782	NM_001099474	ENSRNOG00000039136	Vom2r57	RGD1562007	vomeronasal 2 receptor, 57	protein-coding
MACS_peak_952	chr1	181952012	181952220	+	19.17	NA	Intergenic	SATI_RN|Satellite|Satellite	1777453	NM_080781	114023	Rn.4327	NM_080781	ENSRNOG00000057623	Copb1	-	coatomer protein complex, subunit beta 1	protein-coding
MACS_peak_3055	chr14	60621086	60621612	+	19.16	NA	Intergenic	RatSatRep2|Unknown|Unknown	-26528	NM_001005883	305419	Rn.21189	NM_001005883	ENSRNOG00000003924	Pi4k2b	-	phosphatidylinositol 4-kinase type 2 beta	protein-coding
MACS_peak_4468	chr18	29855470	29856263	+	19.16	NA	Intergenic	RatSatRep2|Unknown|Unknown	-95228	NM_199503	393085	Rn.22308	NM_199503		Pcdha1	rCNRv01	protocadherin alpha 1	protein-coding
MACS_peak_4095	chr17	17361380	17361646	+	19.16	NA	Intergenic	L1_Rat1|LINE|L1	586264	NM_001108881	364681	Rn.178363	NM_001108881	ENSRNOG00000016123	Rnf144b	Ibrdc2	ring finger protein 144B	protein-coding
MACS_peak_11297	chrY_KL568139v1_random	838889	839088	+	19.16	NA	Intergenic	L1_Rn|LINE|L1	-7319258	NM_001166307	498592		NM_001166307		LOC498592	-	similar to CG32662-PA	protein-coding
MACS_peak_218	chr1	42669368	42669770	+	19.16	NA	Intergenic	L1_Rat1|LINE|L1	-81848	NM_001107459	308118	Rn.166916	NM_001107459	ENSRNOG00000018690	Rgs17	-	regulator of G-protein signaling 17	protein-coding
MACS_peak_1098	chr1	213504140	213504811	+	19.14	NA	Intergenic	RNHAL1|LINE|L1	-7430	NM_031543	25086	Rn.1372	NM_031543	ENSRNOG00000012458	Cyp2e1	Cyp2e	cytochrome P450, family 2, subfamily e, polypeptide 1	protein-coding
MACS_peak_641	chr1	130081534	130081874	+	19.12	NA	Intergenic	RNHAL1|LINE|L1	-305428	NM_001047853	293019	Rn.14864	NM_001047853	ENSRNOG00000010775	Arrdc4	Ab1-209|LRRG00117	arrestin domain containing 4	protein-coding
MACS_peak_345	chr1	59424983	59425359	+	19.12	NA	Intergenic	RatSatRep2|Unknown|Unknown	-40827	NM_001113403	171105	Rn.10614	NM_133574	ENSRNOG00000047387	Lnpep	GP160|IRAP|OTase|P-LAP|Vp165	leucyl and cystinyl aminopeptidase	protein-coding
MACS_peak_5927	chr2	213723163	213723387	+	19.1	NA	Intergenic	RatSatRep2|Unknown|Unknown	-301397	NM_001106466	295384	Rn.18530	NM_001106466	ENSRNOG00000017187	Prmt6	Hrmt1l6	protein arginine methyltransferase 6	protein-coding
MACS_peak_8746	chr6	82459154	82459381	+	19.04	NA	Intergenic	RatSatRep2|Unknown|Unknown	-624473	NM_001108024	314164	Rn.224998	NM_001108024	ENSRNOG00000005550	Lrfn5	-	leucine rich repeat and fibronectin type III domain containing 5	protein-coding
MACS_peak_7917	chr5	37187842	37188597	+	19.01	NA	Intergenic	RatSatRep2|Unknown|Unknown	-504863	NM_172085	29588	Rn.82733	NM_172085	ENSRNOG00000006908	Pou3f2	Brn-2|OTF-7|oct-7	POU class 3 homeobox 2	protein-coding
MACS_peak_2285	chr12	23651378	23651868	+	19.01	NA	Intergenic	NICER2_Rn|LTR|ERV1	9386	NM_001109020	367994	Rn.9193	NM_001109020	ENSRNOG00000038896	Upk3bl1	Upk3bl	uroplakin 3B like 1	protein-coding
MACS_peak_8187	chr5	114616013	114616412	+	19.01	NA	intron (NM_001013932, intron 5 of 15)	L1_Rn|LINE|L1	99323	NM_001013932	298250	Rn.8436	NM_001013932	ENSRNOG00000008907	Fggy	-	FGGY carbohydrate kinase domain containing	protein-coding
MACS_peak_6491	chr3	28114030	28114374	+	19.01	NA	Intergenic	L1_Rn|LINE|L1	-302787	NM_053902	116682	Rn.10575	NM_053902	ENSRNOG00000029993	Kynu	-	kynureninase	protein-coding
MACS_peak_8437	chr6	1107972	1108240	+	18.98	NA	Intergenic	(TGCTGGT)n|Simple_repeat|Simple_repeat	-104182	NM_053600	94269	Rn.8714	NM_053600	ENSRNOG00000004577	Fez2	Zrp	fasciculation and elongation protein zeta 2	protein-coding
MACS_peak_6519	chr3	39479527	39480010	+	18.98	NA	Intergenic	RatSatRep2|Unknown|Unknown	116950	NM_001044276	680110	Rn.45197	NM_001044276	ENSRNOG00000005109	Rprm	-	reprimo, TP53 dependent G2 arrest mediator homolog	protein-coding
MACS_peak_85	chr1	15284496	15284708	+	18.98	NA	Intergenic	L1_Rn|LINE|L1	17396	NM_001107522	308717	Rn.110407	NM_001107522	ENSRNOG00000012311	Slc35d3	-	solute carrier family 35, member D3	protein-coding
MACS_peak_491	chr1	84551194	84551711	+	18.98	NA	Intergenic	RNHAL1|LINE|L1	-59973	NM_001191621	308463	Rn.130504	NM_001191621	ENSRNOG00000023521	Map3k10	-	mitogen activated protein kinase kinase kinase 10	protein-coding
MACS_peak_5295	chr2	55238195	55238521	+	18.98	NA	Intergenic	L1_Rn|LINE|L1	-274910	NM_032076	84023	Rn.16062	NM_032076	ENSRNOG00000013240	Ptger4	EP4|Ptger|Ptgerep4	prostaglandin E receptor 4	protein-coding
MACS_peak_1208	chr1	230888655	230888908	+	18.92	NA	Intergenic	L1_Rn|LINE|L1	76981	NM_001000263	293817	Rn.141668	NM_001000263	ENSRNOG00000032117	Olr384	-	olfactory receptor 384	protein-coding
MACS_peak_11109	chrX	118220758	118220974	+	18.92	NA	intron (NM_012765, intron 4 of 5)	RatSatRep2|Unknown|Unknown	30654	NR_106693	102465159		NR_106693	ENSRNOG00000041538	Mir1298	rno-mir-1298	microRNA 1298	ncRNA
MACS_peak_2869	chr14	23772979	23773211	+	18.92	NA	Intergenic	RatSatRep2|Unknown|Unknown	161186	NM_001004098	305270	Rn.85211	NM_001004098	ENSRNOG00000021776	Cenpc	Cenpc1	centromere protein C	protein-coding
MACS_peak_5369	chr2	72634322	72634794	+	18.92	NA	Intergenic	L1_Rat1|LINE|L1	3219164	NM_001168631	29181	Rn.83592	NM_001168631	ENSRNOG00000009771	Cdh10	-	cadherin 10	protein-coding
MACS_peak_5147	chr2	13374615	13374937	+	18.92	NA	Intergenic	L1_Rn|LINE|L1	-218324	NM_052981	84389	Rn.23255	NM_052981	ENSRNOG00000031656	Ccnh	-	cyclin H	protein-coding
MACS_peak_1833	chr11	6319667	6320172	+	18.92	NA	Intergenic	RNHAL1|LINE|L1	-890250	NM_001100502	288333	Rn.29938	NM_001100502		Gbe1	-	1,4-alpha-glucan branching enzyme 1	protein-coding
MACS_peak_9585	chr7	133219425	133219976	+	18.92	NA	Intergenic	RatSatRep2|Unknown|Unknown	170973	NM_001004449	446171	Rn.81962	NM_001004449	ENSRNOG00000037025	Smgc	-	submandibular gland protein C	protein-coding
MACS_peak_1215	chr1	232122138	232122387	+	18.92	NA	Intergenic	L1_Rat1|LINE|L1	-591476	NM_019141	25565	Rn.53972	NM_019141	ENSRNOG00000013239	Tle4	Esp2|Grg-4	transducin-like enhancer of split 4	protein-coding
MACS_peak_4845	chr19	27981870	27982081	+	18.91	NA	Intergenic	Intergenic	-119148	NM_001014221	363337	Rn.198445	NM_001014221	ENSRNOG00000042971	LOC363337	-	similar to RIKEN cDNA 1700081O22	protein-coding
MACS_peak_7055	chr4	10885510	10885731	+	18.91	NA	intron (NM_001106577, intron 4 of 17)	(AGTGAGTG)n|Simple_repeat|Simple_repeat	62362	NM_001106577	296762	Rn.18302	NM_001106577	ENSRNOG00000013517	Phtf2	-	putative homeodomain transcription factor 2	protein-coding
MACS_peak_11234	chrX	153728358	153728631	+	18.91	NA	Intergenic	L1_Rn|LINE|L1	-271484	NM_001106351	689600	Rn.62289	NM_001106351	ENSRNOG00000057651	LOC689600	-	hypothetical protein LOC689600	protein-coding
MACS_peak_4383	chr18	5382582	5382947	+	18.91	NA	Intergenic	L1_Rn|LINE|L1	-68253	NM_001107403	307579	Rn.102276	NM_001107403	ENSRNOG00000016874	Zfp521	Znf521	zinc finger protein 521	protein-coding
MACS_peak_7203	chr4	44144689	44144934	+	18.91	NA	Intergenic	L1_Rn|LINE|L1	-7996	NM_022379	26296	Rn.9659	NM_022379	ENSRNOG00000061595	Tfec	Tcfec	transcription factor EC	protein-coding
MACS_peak_2678	chr13	78423088	78423312	+	18.91	NA	intron (NM_001107190, intron 10 of 19)	RNHAL1|LINE|L1	-91851	NM_001289935	684623		NM_001289935		Gpr52	-	G protein-coupled receptor 52	protein-coding
MACS_peak_2804	chr14	4949425	4949693	+	18.91	NA	Intergenic	Intergenic	151618	NM_001008338	305131	Rn.7626	NM_001008338	ENSRNOG00000002121	Lrrc8d	Lrrc5	leucine rich repeat containing 8 VRAC subunit D	protein-coding
MACS_peak_10797	chrX	36064402	36064765	+	18.91	NA	intron (NM_001190994, intron 19 of 32)	L1_Rat1|LINE|L1	241896	NM_001034935	317498	Rn.103108	NM_001034935	ENSRNOG00000027331	Ppef1	-	protein phosphatase with EF-hand domain 1	protein-coding
MACS_peak_8864	chr6	115489008	115489258	+	18.91	NA	intron (NM_001135874, intron 2 of 5)	RatSatRep2|Unknown|Unknown	24221	NM_001135874	314349	Rn.210121	NM_001135874	ENSRNOG00000004458	Ston2	RGD1311502	stonin 2	protein-coding
MACS_peak_1027	chr1	194861531	194861740	+	18.89	NA	Intergenic	Intergenic	-92116	NM_053611	100912108	Rn.11182	NM_053611	ENSRNOG00000019206	Nupr1	p8	nuclear protein 1, transcriptional regulator	protein-coding
MACS_peak_4802	chr19	26331265	26331557	+	18.89	NA	Intergenic	Intergenic	134574	NM_199404	361378	Rn.102840	NM_199404	ENSRNOG00000023910	Man2b1	Manb	mannosidase, alpha, class 2B, member 1	protein-coding
MACS_peak_2850	chr14	20388219	20388493	+	18.89	NA	Intergenic	L1_Rn|LINE|L1	86372	NM_001047928	498339	Rn.123784	NM_001047928	ENSRNOG00000029004	LOC498339	-	LRRGT00190	protein-coding
MACS_peak_10398	chr9	77516953	77517199	+	18.89	NA	intron (NM_001134728, intron 5 of 8)	L1_Rn|LINE|L1	-317015	NM_001109308	501160	Rn.218688	NM_001109308	ENSRNOG00000027400	Vwc2l	RGD1565501	von Willebrand factor C domain-containing protein 2-like	protein-coding
MACS_peak_11182	chrX	137597384	137597597	+	18.89	NA	Intergenic	L1_Rat1|LINE|L1	-449049	NM_001191736	317589	Rn.162348	NM_001191736	ENSRNOG00000007879	Stk26	Mask|Mst4|RGD1563568	serine/threonine kinase 26	protein-coding
MACS_peak_4495	chr18	34946564	34946907	+	18.87	NA	Intergenic	L1_Rat1|LINE|L1	-175204	NM_001170606	361319	Rn.106870	NM_001170606	ENSRNOG00000013116	Spink5	-	serine peptidase inhibitor, Kazal type 5	protein-coding
MACS_peak_11368	chrY_KL568148v1_random	3043569	3043787	+	18.85	NA	NA	RatSatRep2|Unknown|Unknown	NA	NA
MACS_peak_735	chr1	153087882	153088377	+	18.85	NA	intron (NM_001013896, intron 1 of 14)	RNHAL1|LINE|L1	8051	NM_001013896	293098	Rn.19940	NM_001013896	ENSRNOG00000016815	Tmem135	PMP52|RGD1309948	transmembrane protein 135	protein-coding
MACS_peak_7330	chr4	69237900	69238171	+	18.84	NA	Intergenic	L1_Rn|LINE|L1	-26370	NM_173301	286960	Rn.10387	NM_173301	ENSRNOG00000013245	LOC286960	Try4	preprotrypsinogen IV	protein-coding
MACS_peak_4868	chr19	28649238	28649538	+	18.79	NA	Intergenic	RLTR11A|LTR|ERVK	-786561	NM_001014221	363337	Rn.198445	NM_001014221	ENSRNOG00000042971	LOC363337	-	similar to RIKEN cDNA 1700081O22	protein-coding
MACS_peak_8169	chr5	108750043	108750284	+	18.78	NA	Intergenic	L1_Rn|LINE|L1	471946	NM_001107945	313352	Rn.43064	NM_001107945	ENSRNOG00000024093	Dmrta1	-	DMRT-like family A1	protein-coding
MACS_peak_2456	chr13	24017394	24017613	+	18.78	NA	Intergenic	RatSatRep2|Unknown|Unknown	-828977	NM_001012748	363948	Rn.62576	NM_001012748	ENSRNOG00000014556	Cdh20	Cad20	cadherin 20	protein-coding
MACS_peak_11492	chrY_KL568161v1_random	1865919	1866149	+	18.78	NA	NA	RatSatRep2|Unknown|Unknown	NA	NA
MACS_peak_2146	chr11	89828463	89828872	+	18.77	NA	Intergenic	RatSatRep2|Unknown|Unknown	271394	NM_183052	287927	Rn.3933	NM_183052	ENSRNOG00000001829	Ube2v2	MMS2	ubiquitin conjugating enzyme E2 V2	protein-coding
MACS_peak_2312	chr12	31001316	31001537	+	18.77	NA	Intergenic	Intergenic	-190462	NM_001034924	304431	Rn.12338	NM_001034924	ENSRNOG00000000931	Sfswap	Sfrs8|Srsf8	splicing factor SWAP	protein-coding
MACS_peak_359	chr1	60747280	60747498	+	18.77	NA	Intergenic	L1_Rn|LINE|L1	30003	NM_057140	117281	Rn.4108	NM_057140	ENSRNOG00000011282	Ppp2r1a	PR65	protein phosphatase 2 scaffold subunit A alpha	protein-coding
MACS_peak_7873	chr5	26658647	26658875	+	18.77	NA	Intergenic	L1_Rn|LINE|L1	165549	NM_001171802	500413	Rn.23267	NM_001171802	ENSRNOG00000039924	Triqk	-	triple QxxK/R motif containing	protein-coding
MACS_peak_4194	chr17	44399740	44400281	+	18.77	NA	Intergenic	SATI_RN|Satellite|Satellite	-122134	NM_022686	64627	Rn.1659	NM_022686	ENSRNOG00000054017	Hist1h4b	H1ft|Hist4|Hist4h4	histone cluster 1 H4 family member B	protein-coding
MACS_peak_5097	chr2	7463577	7463807	+	18.77	NA	Intergenic	L1_Rn|LINE|L1	-1269475	NM_001007797	309945	Rn.161886	NM_001007797	ENSRNOG00000045649	Arrdc3	LRRGT00048	arrestin domain containing 3	protein-coding
MACS_peak_1957	chr11	42172518	42172753	+	18.77	NA	Intergenic	RatSatRep2|Unknown|Unknown	-686107	NM_001108842	363760	Rn.101944	NM_001108842	ENSRNOG00000001689	Arl6	-	ADP-ribosylation factor like GTPase 6	protein-coding
MACS_peak_10277	chr9	42260741	42260967	+	18.77	NA	Intergenic	L1_Rn|LINE|L1	-359152	NM_001108210	316325	Rn.163751	NM_001108210	ENSRNOG00000014516	Hs6st1	-	heparan sulfate 6-O-sulfotransferase 1	protein-coding
MACS_peak_5170	chr2	17316200	17316472	+	18.77	NA	Intergenic	(GGCAGA)n|Simple_repeat|Simple_repeat	-1038206	NM_019189	29331	Rn.50531	NM_019189	ENSRNOG00000032002	Hapln1	Crtl1	hyaluronan and proteoglycan link protein 1	protein-coding
MACS_peak_8572	chr6	36457550	36457749	+	18.77	NA	Intergenic	L1_Rat1|LINE|L1	350723	NM_001109276	500629	Rn.12697	NM_001109276	ENSRNOG00000039551	Rdh14	RGD1565196	retinol dehydrogenase 14	protein-coding
MACS_peak_2764	chr13	109616276	109616679	+	18.77	NA	Intergenic	L1_Rn|LINE|L1	-29978	NM_001109085	498316	Rn.57389	NM_001109085	ENSRNOG00000048659	LOC498316	-	hypothetical LOC498316	protein-coding
MACS_peak_806	chr1	169138967	169139264	+	18.77	NA	Intergenic	L1_Rn|LINE|L1	-6330	NM_001047938	499219	Rn.154901	NM_001047938	ENSRNOG00000024789	LOC499219	-	hypothetical protein LOC499219	protein-coding
MACS_peak_7665	chr4	151726818	151727198	+	18.77	NA	Intergenic	L1_Rn|LINE|L1	-210114	NM_001100489	282582	Rn.58724	NM_001100489	ENSRNOG00000008168	Wnt5b	-	Wnt family member 5B	protein-coding
MACS_peak_6278	chr20	29647155	29647443	+	18.77	NA	intron (NM_001007632, intron 10 of 10)	MTD|LTR|ERVL-MaLR	-7927	NM_001108533	361840	Rn.234457	NM_001108533	ENSRNOG00000061544	Spock2	-	SPARC/osteonectin, cwcv and kazal like domains proteoglycan 2	protein-coding
MACS_peak_11513	chrY_KL568161v1_random	5954980	5955345	+	18.75	NA	NA	L1_Rn|LINE|L1	NA	NA
MACS_peak_6460	chr3	22288791	22289057	+	18.75	NA	intron (NM_001191747, intron 7 of 20)	L1_Rat1|LINE|L1	211841	NM_001191747	311913	Rn.92793	NM_001191747	ENSRNOG00000010526	Dennd1a	RGD1307927	DENN domain containing 1A	protein-coding
MACS_peak_3286	chr15	5444156	5444419	+	18.73	NA	intron (NM_001009969, intron 2 of 3)	RatSatRep2|Unknown|Unknown	22760	NM_001009968	316940	Rn.110794	NM_001009968	ENSRNOG00000029659	Spetex-2F	-	Spetex-2F protein	protein-coding
MACS_peak_9155	chr7	21999006	21999305	+	18.73	NA	Intergenic	L1_Rn2|LINE|L1	944004	NM_001099484	503127	Rn.217634	NM_001099484		Vom2r56	RGD1559561	vomeronasal 2 receptor, 56	protein-coding
MACS_peak_8500	chr6	22484255	22484464	+	18.72	NA	Intergenic	L1_Rn|LINE|L1	121874	NM_001029917	298787	Rn.22312	NM_001029917	ENSRNOG00000006340	Memo1	RGD1309929	mediator of cell motility 1	protein-coding
MACS_peak_6380	chr3	181026	181502	+	18.7	NA	Intergenic	L1_Rn|LINE|L1	-12752	NM_001287614	102551365		NM_001287614		LOC102551365	LRRGT00005	stress response protein nst-1-like	protein-coding
MACS_peak_4376	chr18	2638625	2639632	+	18.7	NA	Intergenic	RatSatRep2|Unknown|Unknown	223307	NM_019185	29300	Rn.8701	NM_019185	ENSRNOG00000023433	Gata6	-	GATA binding protein 6	protein-coding
MACS_peak_11264	chrY	712339	712823	+	18.68	NA	Intergenic	RatSatRep2|Unknown|Unknown	-201481	NM_001167666	100312984	Rn.220237	NM_001167666	ENSRNOG00000060048	Eif2s3y	-	eukaryotic translation initiation factor 2, subunit 3, structural gene Y-linked	protein-coding
MACS_peak_575	chr1	105567085	105567402	+	18.68	NA	intron (NM_031069, intron 5 of 19)	RatSatRep2|Unknown|Unknown	218174	NM_031069	81733	Rn.10695	NM_031069	ENSRNOG00000015675	Nell1	-	neural EGFL like 1	protein-coding
MACS_peak_6836	chr3	123114709	123115292	+	18.68	NA	Intergenic	RatSatRep2|Unknown|Unknown	4460	NM_016992	24221	Rn.9976	NM_016992	ENSRNOG00000021229	Avp	DI|VP|Vas	arginine vasopressin	protein-coding
MACS_peak_5819	chr2	183920193	183920483	+	18.68	NA	Intergenic	RatSatRep2|Unknown|Unknown	245816	NM_001108553	361972	Rn.214714	NM_001108553	ENSRNOG00000010866	Tmem154	RGD1563262	transmembrane protein 154	protein-coding
MACS_peak_6932	chr3	153707777	153708378	+	18.68	NA	Intergenic	RatSatRep2|Unknown|Unknown	127208	NM_031977	83805	Rn.112600	NM_031977	ENSRNOG00000009495	Src	-	SRC proto-oncogene, non-receptor tyrosine kinase	protein-coding
MACS_peak_1982	chr11	48405200	48405506	+	18.68	NA	Intergenic	RNHAL1|LINE|L1	1162011	NM_001107095	304005	Rn.58420	NM_001107095	ENSRNOG00000031163	Nfkbiz	Mail|RGD1310834	NFKB inhibitor zeta	protein-coding
MACS_peak_4121	chr17	28092408	28092776	+	18.68	NA	Intergenic	L1_Rat1|LINE|L1	86290	NM_001106128	291359	Rn.3176	NM_001106128	ENSRNOG00000000137	Ly86	-	lymphocyte antigen 86	protein-coding
MACS_peak_5201	chr2	26550191	26550564	+	18.68	NA	intron (NM_031593, intron 4 of 12)	L1_Rat1|LINE|L1	79204	NM_019223	29478	Rn.154403	NM_019223		Ndufs6	Ip13dis|Ndub13|RATIp13dis	NADH:ubiquinone oxidoreductase subunit S6	protein-coding
MACS_peak_9895	chr8	80116554	80116859	+	18.68	NA	Intergenic	RatSatRep2|Unknown|Unknown	324119	NM_001014212	363099	Rn.105523	NM_001014212	ENSRNOG00000052787	Rsl24d1	RGD1309784	ribosomal L24 domain containing 1	protein-coding
MACS_peak_9265	chr7	46350288	46350565	+	18.68	NA	Intergenic	L1_Rn|LINE|L1	1022201	NM_172321	282712	Rn.9716	NM_172321	ENSRNOG00000027468	Slc6a15	Ntt73	solute carrier family 6 member 15	protein-coding
MACS_peak_487	chr1	83927998	83928272	+	18.67	NA	Intergenic	L1_Rn|LINE|L1	-7419	NM_019303	54246	Rn.10817	NM_019303	ENSRNOG00000032805	Cyp2f4	CYP4502F4|Cyp2f1|Cyp2f2	cytochrome P450, family 2, subfamily f, polypeptide 4	protein-coding
MACS_peak_5806	chr2	180031680	180031906	+	18.61	NA	intron (NM_031317, intron 1 of 5)	L1_Rat1|LINE|L1	79566	NM_031317	79429	Rn.211987	NM_031317	ENSRNOG00000010695	Pdgfc	SCDGF	platelet derived growth factor C	protein-coding
MACS_peak_5666	chr2	148944964	148945179	+	18.6	NA	Intergenic	RNHAL1|LINE|L1	-53171	NM_134457	140593	Rn.29192	NM_134457	ENSRNOG00000013703	Siah2	-	siah E3 ubiquitin protein ligase 2	protein-coding
MACS_peak_8910	chr6	129705383	129705747	+	18.59	NA	Intergenic	Intergenic	96491	NM_001108056	314417	Rn.3455	NM_001108056	ENSRNOG00000004827	Papola	-	poly (A) polymerase alpha	protein-coding
MACS_peak_9103	chr7	13562064	13562304	+	18.59	NA	Intergenic	L1_Rn|LINE|L1	-8221	NM_173335	287002	Rn.44383	NM_173335	ENSRNOG00000058943	Olr1082	-	olfactory receptor 1082	protein-coding
MACS_peak_792	chr1	167794346	167794586	+	18.59	NA	Intergenic	RatSatRep2|Unknown|Unknown	8001	NM_001000122	293188	Rn.141926	NM_001000122		Olr48	-	olfactory receptor 48	protein-coding
MACS_peak_3945	chr16	70066378	70066941	+	18.59	NA	Intergenic	RNHAL1|LINE|L1	-167584	NM_012928	25411	Rn.10384	NM_012928		Cnga2	Cncg4|OLFCH	cyclic nucleotide gated channel alpha 2	protein-coding
MACS_peak_11456	chrY_KL568157v1_random	4387541	4387787	+	18.59	NA	NA	L1_Rn|LINE|L1	NA	NA
MACS_peak_303	chr1	55645623	55645882	+	18.53	NA	Intergenic	Intergenic	249884	NM_001099465	685666	Rn.217930	NM_001099465	ENSRNOG00000013671	Vom2r9	RGD1564755	vomeronasal 2 receptor, 9	protein-coding
MACS_peak_4473	chr18	30642007	30642623	+	18.52	NA	Intergenic	L1_Rn|LINE|L1	54443	NM_001114604	307487	Rn.202562	NM_001114604	ENSRNOG00000033479	Pcdhb21	-	protocadherin beta 21	protein-coding
MACS_peak_642	chr1	131307314	131307551	+	18.52	NA	Intergenic	RatSatRep2|Unknown|Unknown	147257	NM_080778	113984	Rn.17815	NM_080778	ENSRNOG00000010308	Nr2f2	Tfcoup2	nuclear receptor subfamily 2, group F, member 2	protein-coding
MACS_peak_10637	chrX	2213367	2213950	+	18.52	NA	Intergenic	(GGCAGA)n|Simple_repeat|Simple_repeat	-96997	NM_001109012	367714	Rn.232192	NM_001109012	ENSRNOG00000025428	Rp2	RGD1565124|Rp2h	RP2, ARL3 GTPase activating protein	protein-coding
MACS_peak_4241	chr17	52594854	52595273	+	18.51	NA	Intergenic	RatSatRep2|Unknown|Unknown	-26027	NM_080405	140588	Rn.199034	NM_080405	ENSRNOG00000014395	Gli3	-	GLI family zinc finger 3	protein-coding
MACS_peak_7074	chr4	15588711	15589190	+	18.51	NA	Intergenic	RatSatRep2|Unknown|Unknown	-83667	NM_017017	24446	Rn.10468	NM_017017	ENSRNOG00000007027	Hgf	HPTA	hepatocyte growth factor	protein-coding
MACS_peak_9808	chr8	53495377	53495621	+	18.51	NA	Intergenic	RatSatRep2|Unknown|Unknown	84183	NM_153311	266681	Rn.163016	NM_153311	ENSRNOG00000008058	Tmprss5	Amp	transmembrane serine protease 5	protein-coding
MACS_peak_6775	chr3	104758340	104758837	+	18.51	NA	Intergenic	RNHAL1|LINE|L1	456401	NM_019282	50566	Rn.42929	NM_019282	ENSRNOG00000026053	Grem1	Cktsf1b1|drm	gremlin 1, DAN family BMP antagonist	protein-coding
MACS_peak_11138	chrX	125429232	125429487	+	18.5	NA	Intergenic	RNHAL1|LINE|L1	350889	NM_001109631	691215	Rn.218604	NM_001109631	ENSRNOG00000028189	LOC691215	-	hypothetical protein LOC691215	protein-coding
MACS_peak_508	chr1	86811363	86811616	+	18.47	NA	Intergenic	Intergenic	-61319	NM_001110491	499114	Rn.105566	NM_001110491		Fbxo27	RGD1563982	F-box protein 27	protein-coding
MACS_peak_3771	chr16	25109421	25109620	+	18.47	NA	intron (NM_001135838, intron 2 of 5)	RatSatRep2|Unknown|Unknown	130705	NM_001169102	290686	Rn.27406	NM_001169102	ENSRNOG00000014188	Tma16	RGD1305222	translation machinery associated 16 homolog	protein-coding
MACS_peak_10236	chr9	30725025	30725254	+	18.47	NA	Intergenic	L1_Rat2|LINE|L1	-214416	NM_139189	246046	Rn.234342	NM_139189	ENSRNOG00000012178	Lmbrd1	-	LMBR1 domain containing 1	protein-coding
MACS_peak_6241	chr20	16441163	16441392	+	18.47	NA	Intergenic	RatSatRep2|Unknown|Unknown	650438	NM_147138	257644	Rn.163272	NM_147138	ENSRNOG00000048682	Zwint	Sip30|Zwint-1	ZW10 interacting kinetochore protein	protein-coding
MACS_peak_10393	chr9	76365853	76366183	+	18.47	NA	Intergenic	RatSatRep2|Unknown|Unknown	-187082	NM_021687	59323	Rn.163078	NM_021687	ENSRNOG00000014248	Erbb4	-	erb-b2 receptor tyrosine kinase 4	protein-coding
MACS_peak_4426	chr18	17471261	17471509	+	18.47	NA	intron (NM_001134607, intron 4 of 8)	RatSatRep2|Unknown|Unknown	67978	NM_001134607	498831	Rn.215821	NM_001134607	ENSRNOG00000029466	RGD1562608	RGD1564140	similar to KIAA1328 protein	protein-coding
MACS_peak_9021	chr7	2111290	2111550	+	18.46	NA	Intergenic	RNLTR8A|LTR|ERVK	242688	NM_001036626	298765	Rn.22055	NM_001036626	ENSRNOG00000005067	Zfp36l2	-	zinc finger protein 36, C3H type-like 2	protein-coding
MACS_peak_11393	chrY_KL568150v1_random	523435	523776	+	18.46	NA	NA	L1_Rn|LINE|L1	NA	NA
MACS_peak_4621	chr18	64459918	64460337	+	18.45	NA	Intergenic	L1_Rn|LINE|L1	-282398	NM_001100491	282839	Rn.92460	NM_001100491	ENSRNOG00000016681	Mc2r	-	melanocortin 2 receptor	protein-coding
MACS_peak_5797	chr2	178571744	178572024	+	18.45	NA	Intergenic	RatSatRep2|Unknown|Unknown	44835	NM_001108551	361968	Rn.72480	NM_001108551	ENSRNOG00000010081	Tmem144	RGD1565845	transmembrane protein 144	protein-coding
MACS_peak_10687	chrX	9762351	9763118	+	18.45	NA	Intergenic	Intergenic	-52918	NM_022184	29647	Rn.72627	NM_022184	ENSRNOG00000060946	Cask	-	calcium/calmodulin dependent serine protein kinase	protein-coding
MACS_peak_8901	chr6	125676701	125677233	+	18.45	NA	intron (NM_019153, intron 4 of 10)	RatSatRep2|Unknown|Unknown	46990	NM_019153	29158	Rn.1699	NM_019153	ENSRNOG00000050539	Fbln5	-	fibulin 5	protein-coding
MACS_peak_2549	chr13	39211654	39212134	+	18.42	NA	Intergenic	RNHAL1|LINE|L1	931316	NM_001012205	363972	Rn.59993	NM_001012205	ENSRNOG00000002595	Dpp10	DPP X|DPPY	dipeptidylpeptidase 10	protein-coding
MACS_peak_1025	chr1	194678923	194679124	+	18.42	NA	Intergenic	RNHAL1|LINE|L1	90496	NM_053611	100912108	Rn.11182	NM_053611	ENSRNOG00000019206	Nupr1	p8	nuclear protein 1, transcriptional regulator	protein-coding
MACS_peak_4759	chr19	13639245	13639445	+	18.42	NA	Intergenic	L1_Rn|LINE|L1	-696402	NM_001108439	361368	Rn.24338	NM_001108439	ENSRNOG00000013742	Large1	Large	LARGE xylosyl- and glucuronyltransferase 1	protein-coding
MACS_peak_5254	chr2	47355218	47355475	+	18.42	NA	Intergenic	RatSatRep2|Unknown|Unknown	-73959	NM_030994	25118	Rn.91044	NM_030994	ENSRNOG00000053550	Itga1	-	integrin subunit alpha 1	protein-coding
MACS_peak_2720	chr13	90784340	90784577	+	18.42	NA	Intergenic	L1_Rat1|LINE|L1	25198	NM_024144	79112	Rn.163231	NM_024144	ENSRNOG00000007735	Pigm	GPI-MT-I	phosphatidylinositol glycan anchor biosynthesis, class M	protein-coding
MACS_peak_5411	chr2	79714298	79714544	+	18.42	NA	Intergenic	L1_Rn|LINE|L1	-274434	NM_001108545	361907	Rn.45065	NM_001108545	ENSRNOG00000024433	Fbxl7	-	F-box and leucine-rich repeat protein 7	protein-coding
MACS_peak_5638	chr2	141538705	141539187	+	18.42	NA	Intergenic	(TCCA)n|Simple_repeat|Simple_repeat	87712	NM_001191846	84482	Rn.116108	NM_001191846	ENSRNOG00000013397	Foxo1	Fkhr|Foxo1a	forkhead box O1	protein-coding
MACS_peak_743	chr1	154488304	154488534	+	18.42	NA	Intergenic	L1_Rat1|LINE|L1	110914	NM_053554	89816	Rn.24871	NM_053554	ENSRNOG00000018322	Picalm	Calm	phosphatidylinositol binding clathrin assembly protein	protein-coding
MACS_peak_8704	chr6	72340730	72341086	+	18.42	NA	Intergenic	RatSatRep2|Unknown|Unknown	-18854	NM_001108710	362735	Rn.8204	NM_001108710	ENSRNOG00000005286	Coch	-	cochlin	protein-coding
MACS_peak_4118	chr17	26877948	26878235	+	18.42	NA	Intergenic	RNIAP1a|LTR|ERVK	-47737	NM_001271330	100362805	Rn.128652	NM_001271330	ENSRNOG00000013469	Txndc5	-	thioredoxin domain containing 5	protein-coding
MACS_peak_6571	chr3	55301289	55301560	+	18.42	NA	Intergenic	RatSatRep2|Unknown|Unknown	-67858	NM_001024260	311111	Rn.39383	NM_001024260	ENSRNOG00000006611	Nostrin	-	nitric oxide synthase trafficking	protein-coding
MACS_peak_6690	chr3	85386883	85387104	+	18.42	NA	Intergenic	L1_Rn|LINE|L1	-34176	NM_001107753	311236	Rn.219303	NM_001107753	ENSRNOG00000029798	Lrrc4c	RGD1311013	leucine rich repeat containing 4C	protein-coding
MACS_peak_8741	chr6	81209103	81209647	+	18.41	NA	Intergenic	RatSatRep2|Unknown|Unknown	-874853	NM_001108023	314157	Rn.234382	NM_001108023	ENSRNOG00000005285	Fbxo33	-	F-box protein 33	protein-coding
MACS_peak_4556	chr18	50809737	50810015	+	18.41	NA	Intergenic	RatSatRep2|Unknown|Unknown	-682320	NM_001014011	307288	Rn.53932	NM_001014011	ENSRNOG00000015225	Gramd3	Gramd2b|RGD1311016	GRAM domain containing 3	protein-coding
MACS_peak_2711	chr13	89442134	89442764	+	18.39	NA	Intergenic	Intergenic	-37609	NM_001109075	498278	Rn.7902	NM_001109075	ENSRNOG00000034221	Cfap126	RGD1562658	cilia and flagella associated protein 126	protein-coding
MACS_peak_2659	chr13	72015737	72015994	+	18.39	NA	intron (NM_019294, intron 7 of 48)	RatSatRep2|Unknown|Unknown	352122	NM_019294	54234	Rn.10742	NM_019294	ENSRNOG00000002863	Cacna1e	CACHA1E|Cav2.3	calcium voltage-gated channel subunit alpha1 E	protein-coding
MACS_peak_3865	chr16	49230652	49230942	+	18.38	NA	Intergenic	L1_Rat1|LINE|L1	-36106	NM_053515	85333	Rn.4092	NM_053515	ENSRNOG00000010830	Slc25a4	Ant1	solute carrier family 25 member 4	protein-coding
MACS_peak_2872	chr14	24160166	24160401	+	18.38	NA	Intergenic	RatSatRep2|Unknown|Unknown	-37030	NM_001004020	365265	Rn.138998	NM_001004020	ENSRNOG00000002002	Tmprss11b	Hatl5|Tmprss11bnl	transmembrane serine protease 11B	protein-coding
MACS_peak_7567	chr4	121858376	121858803	+	18.38	NA	Intergenic	RatSatRep2|Unknown|Unknown	110857	NM_001166760	685880	Rn.222409	NM_001166760	ENSRNOG00000053093	Vom1r99	Vom1r-ps113	vomeronasal 1 receptor 99	protein-coding
MACS_peak_4235	chr17	50558203	50558413	+	18.38	NA	intron (NM_001014146, intron 9 of 12)	RatSatRep2|Unknown|Unknown	566994	NM_001014146	361253	Rn.35332	NM_001014146		Sugct	RGD1308114	succinylCoA:glutarate-CoA transferase	protein-coding
MACS_peak_10660	chrX	5601565	5601851	+	18.38	NA	Intergenic	L1_Rn|LINE|L1	52240	NM_001025027	363442	Rn.22678	NM_001025027	ENSRNOG00000003470	Fundc1	-	FUN14 domain containing 1	protein-coding
MACS_peak_842	chr1	173300491	173301314	+	18.38	NA	Intergenic	RatSatRep2|Unknown|Unknown	92488	NM_001000223	293421	Rn.141757	NM_001000223	ENSRNOG00000032092	Olr285	ratchr1-166658959-166659894_ORF	olfactory receptor 285	protein-coding
MACS_peak_4407	chr18	11682070	11682729	+	18.38	NA	Intergenic	RatSatRep2|Unknown|Unknown	107309	NM_001107402	307563	Rn.99931	NM_001107402	ENSRNOG00000017159	Dsc3	-	desmocollin 3	protein-coding
MACS_peak_4561	chr18	51179588	51179959	+	18.38	NA	Intergenic	L1_Rn|LINE|L1	-312423	NM_001014011	307288	Rn.53932	NM_001014011	ENSRNOG00000015225	Gramd3	Gramd2b|RGD1311016	GRAM domain containing 3	protein-coding
MACS_peak_341	chr1	56717171	56717725	+	18.38	NA	Intergenic	L1_Rn|LINE|L1	-33877	NM_001169138	292406	Rn.165619	NM_001169138	ENSRNOG00000010529	Thbs2	TSP-2	thrombospondin 2	protein-coding
MACS_peak_8268	chr5	137767882	137768317	+	18.38	NA	Intergenic	L1_Rat1|LINE|L1	10161	NM_001000584	366457	Rn.143178	NM_001000584	ENSRNOG00000050546	Olr858	-	olfactory receptor 858	protein-coding
MACS_peak_5109	chr2	8310273	8310511	+	18.38	NA	Intergenic	L1_Rn|LINE|L1	-422775	NM_001007797	309945	Rn.161886	NM_001007797	ENSRNOG00000045649	Arrdc3	LRRGT00048	arrestin domain containing 3	protein-coding
MACS_peak_10889	chrX	52847079	52847297	+	18.37	NA	Intergenic	RatSatRep2|Unknown|Unknown	-513620	NM_001005244	24907	Rn.10307	NM_012698	ENSRNOG00000046366	Dmd	DNADMD1	dystrophin	protein-coding
MACS_peak_2514	chr13	33593792	33593995	+	18.37	NA	Intergenic	ISAT_RN|Satellite|Satellite	657757	NM_021762	60381	Rn.156195	NM_021762	ENSRNOG00000002319	Tsn	-	translin	protein-coding
MACS_peak_7210	chr4	44513993	44514296	+	18.37	NA	Intergenic	L1_Rn|LINE|L1	-59120	NM_131914	363425	Rn.81070	NM_131914	ENSRNOG00000057713	Cav2	-	caveolin 2	protein-coding
MACS_peak_4293	chr17	65427948	65428158	+	18.32	NA	Intergenic	NICER1C_Rn_I-int|LTR|ERV1	-69306	NM_172330	282833	Rn.91141	NM_172330	ENSRNOG00000027506	Zp4	Zp-4	zona pellucida glycoprotein 4	protein-coding
MACS_peak_7524	chr4	108938282	108938529	+	18.32	NA	intron (NM_001106598, intron 1 of 18)	L1_Rn|LINE|L1	104258	NM_001106598	297357	Rn.214082	NM_001106598	ENSRNOG00000006003	Ctnna2	Catna2	catenin alpha 2	protein-coding
MACS_peak_2047	chr11	65614742	65615060	+	18.32	NA	Intergenic	L1_Rat1|LINE|L1	144657	NM_001195558	303919	Rn.16536	NM_001195558	ENSRNOG00000027151	Lrrc58	RGD1307440	leucine rich repeat containing 58	protein-coding
MACS_peak_3031	chr14	53816060	53816397	+	18.32	NA	Intergenic	RatSatRep2|Unknown|Unknown	1265323	NM_001004087	360942	Rn.228266	NM_001004087	ENSRNOG00000012367	Pcdh7	-	protocadherin 7	protein-coding
MACS_peak_9673	chr8	12109530	12109748	+	18.32	NA	Intergenic	Intergenic	-174036	NM_001108123	315422	Rn.6511	NM_001108123	ENSRNOG00000005923	Mtmr2	-	myotubularin related protein 2	protein-coding
MACS_peak_3772	chr16	25200151	25200401	+	18.32	NA	intron (NM_001135838, intron 1 of 5)	L1_Rn|LINE|L1	221461	NM_001169102	290686	Rn.27406	NM_001169102	ENSRNOG00000014188	Tma16	RGD1305222	translation machinery associated 16 homolog	protein-coding
MACS_peak_5549	chr2	116468525	116469056	+	18.32	NA	Intergenic	L1_Rn|LINE|L1	36067	NR_001567	378461		NR_001567	ENSRNOG00000051777	Terc	Tr	telomerase RNA component	ncRNA
MACS_peak_1273	chr1	248555615	248555814	+	18.32	NA	Intergenic	L1_Rat1|LINE|L1	-91546	NM_001106349	293894	Rn.225788	NM_001106349	ENSRNOG00000042441	Tpd52l3	RGD1309391|Trpd52l3	tumor protein D52-like 3	protein-coding
MACS_peak_3848	chr16	44534643	44534945	+	18.32	NA	Intergenic	L1_Rn|LINE|L1	-1889075	NM_001169133	306451		NM_001169133	ENSRNOG00000012802	Tenm3	Odz3	teneurin transmembrane protein 3	protein-coding
MACS_peak_4154	chr17	35946414	35946679	+	18.32	NA	intron (NM_030985, intron 2 of 2)	RatSatRep2|Unknown|Unknown	11531	NM_030985	24180	Rn.9814	NM_030985	ENSRNOG00000018346	Agtr1a	AT1|AT1A|AT1R|Agtr1	angiotensin II receptor, type 1a	protein-coding
MACS_peak_4244	chr17	53034318	53034555	+	18.32	NA	Intergenic	L1_Rat1|LINE|L1	52838	NM_001014010	307008	Rn.6513	NM_001014010	ENSRNOG00000015523	RGD1308147	-	similar to expressed sequence AW209491	protein-coding
MACS_peak_11048	chrX	103639766	103640139	+	18.32	NA	Intergenic	RNNICER2-int|LTR|ERV1	853762	NM_001169129	317183	Rn.24970	NM_001169129	ENSRNOG00000003929	Pcdh19	RGD1565392	protocadherin 19	protein-coding
MACS_peak_9177	chr7	23935020	23935405	+	18.32	NA	Intergenic	RatSatRep2|Unknown|Unknown	21382	NM_207614	362855	Rn.11875	NM_207614	ENSRNOG00000004813	Rtcb	-	RNA 2',3'-cyclic phosphate and 5'-OH ligase	protein-coding
MACS_peak_6635	chr3	74022360	74022568	+	18.32	NA	Intergenic	L1_Rn|LINE|L1	-7669	NM_001000316	295769	Rn.142935	NM_001000316	ENSRNOG00000049954	Olr516	-	olfactory receptor 516	protein-coding
MACS_peak_9773	chr8	42071787	42072068	+	18.32	NA	Intergenic	L1_Rn|LINE|L1	25534	NM_001000444	300554	Rn.143540	NM_001000444	ENSRNOG00000047286	Olr1229	ratchr8-40485425-40486366_ORF	olfactory receptor 1229	protein-coding
MACS_peak_10434	chr9	85915603	85915891	+	18.32	NA	Intergenic	L1_Rn|LINE|L1	187411	NM_001106923	301555	Rn.101949	NM_001106923	ENSRNOG00000015633	Cul3	-	cullin 3	protein-coding
MACS_peak_2060	chr11	67572665	67573021	+	18.32	NA	Intergenic	RNHAL1|LINE|L1	17051	NM_001105876	288067	Rn.23703	NM_001105876	ENSRNOG00000023953	Csta	-	cystatin A	protein-coding
MACS_peak_7153	chr4	32137500	32137699	+	18.32	NA	Intergenic	RNHAL1|LINE|L1	-49999	NM_001126090	680532	Rn.8472	NM_001126090	ENSRNOG00000010420	Sem1	Dss1|Shfm1	SEM1, 26S proteasome complex subunit	protein-coding
MACS_peak_10053	chr8	121101701	121102139	+	18.32	NA	Intergenic	L1_Rn|LINE|L1	-655413	NM_001135045	363153	Rn.7511	NM_001135045	ENSRNOG00000008919	Arpp21	Arpp-21|Ppp1r1c|Ppp1r1cl|RGD1307208|RGD1307215	cAMP regulated phosphoprotein 21	protein-coding
MACS_peak_8811	chr6	98055346	98055615	+	18.32	NA	intron (NM_133610, intron 7 of 10)	L1_Rn|LINE|L1	101607	NM_133610	171146	Rn.48753	NM_133610	ENSRNOG00000009542	Kcnh5	Eag2	potassium voltage-gated channel subfamily H member 5	protein-coding
MACS_peak_3319	chr15	10867698	10868016	+	18.32	NA	Intergenic	L1_Rn|LINE|L1	405108	NM_001100508	289934	Rn.24121	NM_001100508	ENSRNOG00000005993	Oxsm	RGD1311092	3-oxoacyl-ACP synthase, mitochondrial	protein-coding
MACS_peak_7996	chr5	58960061	58960471	+	18.32	NA	Intergenic	L1_Rn|LINE|L1	-9893	NM_001015016	313498	Rn.162392	NM_001015016	ENSRNOG00000017485	Cd72	-	Cd72 molecule	protein-coding
MACS_peak_2601	chr13	57050374	57050690	+	18.32	NA	intron (NM_130409, intron 5 of 21)	L1_Rn|LINE|L1	30008	NM_130409	155012	Rn.101777	NM_130409	ENSRNOG00000030715	Cfh	AMBP-1|AMBP1|Fh	complement factor H	protein-coding
MACS_peak_2767	chr13	111336295	111336848	+	18.3	NA	Intergenic	RNHAL1|LINE|L1	248198	NM_001108351	360899	Rn.101908	NM_001108351	ENSRNOG00000060773	Sertad4	RGD1565408	SERTA domain containing 4	protein-coding
MACS_peak_6895	chr3	139035058	139035406	+	18.3	NA	Intergenic	RatSatRep2|Unknown|Unknown	60361	NM_001107785	311491	Rn.94281	NM_001107785	ENSRNOG00000009461	Scp2d1	RGD1308385	SCP2 sterol-binding domain containing 1	protein-coding
MACS_peak_2443	chr13	18900220	18900501	+	18.3	NA	Intergenic	L1_Rn|LINE|L1	-2778152	NM_001047873	301650	Rn.202933	NM_001047873	ENSRNOG00000032206	Cntnap5b	Caspr5-2|Caspr5-3|Cntnap5c|RGD1565194	contactin associated protein-like 5B	protein-coding
MACS_peak_9233	chr7	39505404	39505674	+	18.3	NA	Intergenic	L1_Rn|LINE|L1	559703	NM_001025052	500825	Rn.123299	NM_001025052	ENSRNOG00000004875	Ccer1	-	coiled-coil glutamate-rich protein 1	protein-coding
MACS_peak_6863	chr3	131255192	131255514	+	18.3	NA	Intergenic	RatSatRep2|Unknown|Unknown	-96234	NM_001107782	311462	Rn.12235	NM_001107782	ENSRNOG00000008088	Btbd3	-	BTB domain containing 3	protein-coding
MACS_peak_9238	chr7	40400604	40400968	+	18.28	NA	Intergenic	RatSatRep2|Unknown|Unknown	82296	NM_001024352	500827	Rn.123316	NM_001024352	ENSRNOG00000051928	LOC500827	-	similar to hypothetical protein FLJ35821	protein-coding
MACS_peak_141	chr1	24971828	24972167	+	18.23	NA	Intergenic	Intergenic	-201092	NM_001108459	361459	Rn.230112	NM_001108459		Clvs2	Clavesin-2|RGD1306801|Rlbp1l2	clavesin 2	protein-coding
MACS_peak_7171	chr4	39566174	39566452	+	18.23	NA	Intergenic	L1_Rn|LINE|L1	48634	NM_001004267	312132	Rn.106000	NM_001004267	ENSRNOG00000006206	Tmem106b	LRRGT00101	transmembrane protein 106B	protein-coding
MACS_peak_5359	chr2	70844226	70844479	+	18.23	NA	Intergenic	L1_Rn|LINE|L1	1428958	NM_001168631	29181	Rn.83592	NM_001168631	ENSRNOG00000009771	Cdh10	-	cadherin 10	protein-coding
MACS_peak_10324	chr9	56030867	56031162	+	18.23	NA	Intergenic	L1_Rat1|LINE|L1	-357310	NM_001108795	363228	Rn.199984	NM_001108795	ENSRNOG00000016623	Tmeff2	-	transmembrane protein with EGF-like and two follistatin-like domains 2	protein-coding
MACS_peak_499	chr1	86006355	86006985	+	18.22	NA	Intergenic	RatSatRep2|Unknown|Unknown	-96628	NM_001099469	292414	Rn.217941	NM_001099469	ENSRNOG00000011191	Vom2r10	RGD1565464	vomeronasal 2 receptor, 10	protein-coding
MACS_peak_2741	chr13	96019514	96019725	+	18.22	NA	Intergenic	Intergenic	-75858	NM_001105975	289276	Rn.9047	NM_001105975	ENSRNOG00000004481	Adss	Adss2	adenylosuccinate synthase	protein-coding
MACS_peak_6946	chr3	157621900	157622299	+	18.22	NA	intron (NM_001108603, intron 14 of 27)	RNHAL1|LINE|L1	-522793	NM_001107797	311607	Rn.43055	NM_001107797	ENSRNOG00000016744	Chd6	CHD-6	chromodomain helicase DNA binding protein 6	protein-coding
MACS_peak_6816	chr3	118172186	118172410	+	18.22	NA	intron (NM_001013919, intron 2 of 9)	RatSatRep2|Unknown|Unknown	27702	NM_001013919	296117	Rn.2937	NM_001013919	ENSRNOG00000009289	Galk2	-	galactokinase 2	protein-coding
MACS_peak_3762	chr16	22031994	22032229	+	18.22	NA	Intergenic	RatSatRep2|Unknown|Unknown	-218389	NM_153470	266711	Rn.3213	NM_153470	ENSRNOG00000011826	Lzts1	Psdzip70	leucine zipper tumor suppressor 1	protein-coding
MACS_peak_1271	chr1	247990795	247991049	+	18.22	NA	Intergenic	L1_Rat1|LINE|L1	-5425	NM_001107584	309326	Rn.198558	NM_001107584	ENSRNOG00000053859	Ranbp6	-	RAN binding protein 6	protein-coding
MACS_peak_7184	chr4	42313412	42313758	+	18.21	NA	Intergenic	L1_Rn|LINE|L1	110747	NM_001105668	362325	Rn.18295	NM_001105668	ENSRNOG00000053787	Mdfic	Kdt1	MyoD family inhibitor domain containing	protein-coding
MACS_peak_4323	chr17	81496845	81497273	+	18.2	NA	intron (NM_001106124, intron 5 of 10)	L1_Rn|LINE|L1	31679	NM_001106124	291328	Rn.218428	NM_001106124	ENSRNOG00000025639	Slc39a12	-	solute carrier family 39 member 12	protein-coding
MACS_peak_2684	chr13	80660381	80660682	+	18.2	NA	Intergenic	L1_Rn|LINE|L1	41784	NM_144562	246247	Rn.216582	NM_144561	ENSRNOG00000003400	Fmo4	-	flavin containing monooxygenase 4	protein-coding
MACS_peak_2893	chr14	33199261	33200082	+	18.2	NA	Intergenic	RatSatRep2|Unknown|Unknown	-47734	NM_001008870	408234	Rn.215227	NM_001008870	ENSRNOG00000047065	Spink2	-	serine peptidase inhibitor, Kazal type 2 (acrosin-trypsin inhibitor)	protein-coding
MACS_peak_10648	chrX	3205867	3206097	+	18.17	NA	Intergenic	RNHAL1|LINE|L1	-477937	NR_031935	100314059		NR_031935	ENSRNOG00000035581	Mir222	rno-mir-222	microRNA 222	ncRNA
MACS_peak_3323	chr15	12565714	12565915	+	18.17	NA	Intergenic	Intergenic	-3421	NM_001271294	305714	Rn.22227	NM_001271293	ENSRNOG00000007701	Thoc7	RGD1305475	THO complex 7	protein-coding
MACS_peak_8206	chr5	120927911	120928161	+	18.17	NA	Intergenic	L1_Rat1|LINE|L1	424561	NM_012596	24536	Rn.9891	NM_012596		Lepr	Fa	leptin receptor	protein-coding
MACS_peak_240	chr1	48477959	48478198	+	18.17	NA	intron (NM_019230, intron 2 of 10)	L1_Rn|LINE|L1	44999	NM_019230	29504	Rn.24231	NM_019230	ENSRNOG00000022946	Slc22a3	-	solute carrier family 22 member 3	protein-coding
MACS_peak_7401	chr4	82750216	82750484	+	18.17	NA	Intergenic	L1_Rat1|LINE|L1	-26396	NM_001004199	246244	Rn.3474	NM_001004199	ENSRNOG00000008393	Tax1bp1	Aa1076	Tax1 binding protein 1	protein-coding
MACS_peak_2324	chr12	35859016	35859232	+	18.17	NA	Intergenic	L1_Rn|LINE|L1	539109	NM_001134536	304458	Rn.214190	NM_001134536		Tmem132b	RGD1566191	transmembrane protein 132B	protein-coding
MACS_peak_3430	chr15	37389120	37389412	+	18.17	NA	Intergenic	(GCT)n|Simple_repeat|Simple_repeat	-5977	NM_001004099	394266	Rn.219269	NM_001004099	ENSRNOG00000008855	Gjb2	CXN-26|Cx26	gap junction protein, beta 2	protein-coding
MACS_peak_4500	chr18	35424716	35424988	+	18.17	NA	Intergenic	RatSatRep2|Unknown|Unknown	-64422	NM_001170469	291604	Rn.222428	NM_001170469	ENSRNOG00000045895	Dcp2	RGD1562909	decapping mRNA 2	protein-coding
MACS_peak_5360	chr2	70954191	70954493	+	18.17	NA	Intergenic	L1_Rn|LINE|L1	1538948	NM_001168631	29181	Rn.83592	NM_001168631	ENSRNOG00000009771	Cdh10	-	cadherin 10	protein-coding
MACS_peak_3553	chr15	72669480	72669706	+	18.17	NA	Intergenic	L1_Rn|LINE|L1	-890560	NM_001107280	306081	Rn.99314	NM_001107280	ENSRNOG00000013306	Pcdh20	-	protocadherin 20	protein-coding
MACS_peak_10257	chr9	38916740	38917012	+	18.17	NA	Intergenic	L1_Rn|LINE|L1	381420	NM_001024762	301323	Rn.11846	NM_001024762	ENSRNOG00000012486	Prim2	Pola3	DNA primase subunit 2	protein-coding
MACS_peak_8323	chr5	151976751	151977362	+	18.17	NA	Intergenic	CpG	-29337	NM_001106635	297867	Rn.61077	NM_001106635	ENSRNOG00000006137	Arid1a	-	AT-rich interaction domain 1A	protein-coding
MACS_peak_7605	chr4	133285311	133285557	+	18.17	NA	promoter-TSS (NM_001106613)	promoter-TSS (NM_001106613)	-118	NM_001106613	297486	Rn.11876	NM_001106613	ENSRNOG00000024647	Ppp4r2	-	protein phosphatase 4, regulatory subunit 2	protein-coding
MACS_peak_9589	chr7	135866775	135867035	+	18.17	NA	Intergenic	(AGGCAG)n|Simple_repeat|Simple_repeat	-13389	NM_001271239	500921	Rn.88857	NM_001271239		Tmem117	RGD1562562	transmembrane protein 117	protein-coding
MACS_peak_8898	chr6	125360299	125360634	+	18.16	NA	Intergenic	Intergenic	240833	NM_001025152	500707	Rn.43919	NM_001025152	ENSRNOG00000004754	Tc2n	Mtac2d1|Tac2-N	tandem C2 domains, nuclear	protein-coding
MACS_peak_9551	chr7	127468513	127468982	+	18.16	NA	Intergenic	RatSatRep2|Unknown|Unknown	-410691	NM_001134861	300129	Rn.99537	NM_001134861	ENSRNOG00000017022	Cerk	-	ceramide kinase	protein-coding
MACS_peak_1553	chr10	45492445	45492930	+	18.16	NA	Intergenic	L1_Rn|LINE|L1	22222	NM_001108827	363611	Rn.64287	NM_001108827	ENSRNOG00000022725	Iba57	RGD1306000	IBA57, iron-sulfur cluster assembly	protein-coding
MACS_peak_10265	chr9	40516445	40516667	+	18.16	NA	Intergenic	(CTCCCTGT)n|Simple_repeat|Simple_repeat	-455533	NM_001013111	301333	Rn.9310	NM_001013111	ENSRNOG00000013415	Ptpn18	PTP20	protein tyrosine phosphatase, non-receptor type 18	protein-coding
MACS_peak_2682	chr13	80656147	80656590	+	18.16	NA	Intergenic	RatSatRep2|Unknown|Unknown	-41443	NR_111961	360865		NR_111961		Prrc2c	Bat2d|Bat2d1|RGD1566064	proline-rich coiled-coil 2C	pseudo
MACS_peak_815	chr1	169584832	169585217	+	18.13	NA	Intergenic	L1_Rn|LINE|L1	-5284	NM_001000168	293302	Rn.141847	NM_001000168	ENSRNOG00000017234	Olr155	ratchr1-162335141-162336112_ORF	olfactory receptor 155	protein-coding
MACS_peak_4833	chr19	27861471	27861697	+	18.09	NA	exon (NM_001014221, exon 2 of 5)	exon (NM_001014221, exon 2 of 5)	1243	NM_001014221	363337	Rn.198445	NM_001014221	ENSRNOG00000042971	LOC363337	-	similar to RIKEN cDNA 1700081O22	protein-coding
MACS_peak_517	chr1	89254679	89254952	+	18.07	NA	Intergenic	ZP3AR|Satellite|Satellite	15115	NM_001005877	292794	Rn.228916	NM_001005877	ENSRNOG00000021021	Ffar2	Gpr43	free fatty acid receptor 2	protein-coding
MACS_peak_10939	chrX	66846291	66846613	+	18.07	NA	Intergenic	L1_Rn|LINE|L1	532036	NM_001106583	296867	Rn.218317	NM_001106583	ENSRNOG00000021547	Pgr15l	RGD1562685	G protein-coupled receptor 15-like	protein-coding
MACS_peak_10626	chrUn_KL568488v1	318	627	+	18.07	NA	NA	SSU-rRNA_Hsa|rRNA|rRNA	NA	NA
MACS_peak_3687	chr16	6940194	6940435	+	18.07	NA	intron (NM_198774, intron 1 of 7)	intron (NM_198774, intron 1 of 7)	-22423	NM_181368	290553	Rn.203378	NM_181368	ENSRNOG00000017369	Mustn1	Mustang	musculoskeletal, embryonic nuclear protein 1	protein-coding
MACS_peak_8145	chr5	103378585	103378998	+	18.07	NA	Intergenic	Intergenic	-100976	NM_053935	116743	Rn.10787	NM_053935	ENSRNOG00000006761	Sh3gl2	Sh3d2a|Sh3p4	SH3 domain containing GRB2 like 2, endophilin A1	protein-coding
MACS_peak_7928	chr5	40247960	40248207	+	18.07	NA	Intergenic	(CTGCTC)n|Simple_repeat|Simple_repeat	-10492	NM_053465	84597	Rn.212206	NM_053465	ENSRNOG00000008475	Fut9	-	fucosyltransferase 9	protein-coding
MACS_peak_11381	chrY_KL568149v1_random	449513	449714	+	18.07	NA	NA	(CTT)n|Simple_repeat|Simple_repeat	NA	NA
MACS_peak_4127	chr17	29837848	29838059	+	18.07	NA	intron (NM_001014145, intron 3 of 9)	(AGGA)n|Simple_repeat|Simple_repeat	57433	NM_001014145	361237	Rn.146844	NM_001014145	ENSRNOG00000032215	Cdyl	-	chromodomain Y-like	protein-coding
MACS_peak_4454	chr18	25699263	25699726	+	18.07	NA	Intergenic	Intergenic	-49610	NM_012727	25050	Rn.11046	NM_012727	ENSRNOG00000020478	Camk4	Ccdpk|RATCCDPK	calcium/calmodulin-dependent protein kinase IV	protein-coding
MACS_peak_2643	chr13	67292008	67292240	+	18.07	NA	Intergenic	(CTT)n|Simple_repeat|Simple_repeat	58736	NR_132640	100911717	Rn.22302	NR_132640		LOC100911717	Ptgs2os	uncharacterized LOC100911717	ncRNA
MACS_peak_10124	chr9	6688106	6688314	+	18.07	NA	Intergenic	L1_Rn|LINE|L1	-278698	NM_001100888	301155	Rn.214119	NM_001100888	ENSRNOG00000046515	St6gal2	ST6Gal-II|ST6GalII	ST6 beta-galactoside alpha-2,6-sialyltransferase 2	protein-coding
MACS_peak_6191	chr20	6178213	6178452	+	18.07	NA	Intergenic	NICER2_Rn|LTR|ERV1	52864	NM_001015025	361813	Rn.13142	NM_001015025	ENSRNOG00000000519	Stk38	-	serine/threonine kinase 38	protein-coding
MACS_peak_4255	chr17	56095030	56095278	+	18.07	NA	Intergenic	Intergenic	-14249	NM_053847	116596	Rn.9939	NM_053847	ENSRNOG00000016378	Map3k8	D17TPL2|Tpl-2|Tpl2	mitogen-activated protein kinase kinase kinase 8	protein-coding
MACS_peak_11310	chrY_KL568139v1_random	4400623	4400882	+	18.07	NA	Intergenic	L1_Rn|LINE|L1	-3757494	NM_001166307	498592		NM_001166307		LOC498592	-	similar to CG32662-PA	protein-coding
MACS_peak_3457	chr15	47984593	47984848	+	18.07	NA	Intergenic	(AGA)n|Simple_repeat|Simple_repeat	20422	NR_031866	100314291		NR_031866	ENSRNOG00000035471	Mir124-1	rno-mir-124-1	microRNA 124-1	ncRNA
MACS_peak_11194	chrX	142368685	142368888	+	18.07	NA	Intergenic	L1_Rat1|LINE|L1	-204566	NM_053428	84488	Rn.15709	NM_053428	ENSRNOG00000042753	Fgf13	FGF-13	fibroblast growth factor 13	protein-coding
MACS_peak_11347	chrY_KL568144v1_random	112790	112992	+	18.07	NA	NA	(TCT)n|Simple_repeat|Simple_repeat	NA	NA
MACS_peak_8882	chr6	119643028	119643279	+	18.07	NA	Intergenic	(AGAAGA)n|Simple_repeat|Simple_repeat	123439	NM_001106750	299236	Rn.219532	NM_001106750	ENSRNOG00000003732	Flrt2	-	fibronectin leucine rich transmembrane protein 2	protein-coding
MACS_peak_1520	chr10	35027833	35028152	+	18.07	NA	Intergenic	(CCAT)n|Simple_repeat|Simple_repeat	12431	NM_001271112	100910318	Rn.3710	NM_001271111	ENSRNOG00000049062	Trappc2b	-	trafficking protein particle complex 2B	protein-coding
MACS_peak_3855	chr16	47069281	47069492	+	18.07	NA	Intergenic	RNNICER2-int|LTR|ERV1	138045	NM_001013882	290741	Rn.105816	NM_001013882	ENSRNOG00000013215	Dctd	-	dCMP deaminase	protein-coding
MACS_peak_5193	chr2	24074315	24074643	+	18.07	NA	intron (NM_001107646, intron 4 of 25)	intron (NM_001107646, intron 4 of 25)	49645	NM_001107646	309969	Rn.11685	NM_001107646	ENSRNOG00000010624	Ap3b1	-	adaptor-related protein complex 3, beta 1 subunit	protein-coding
MACS_peak_9262	chr7	46206844	46207225	+	18.07	NA	Intergenic	L1_Rat1|LINE|L1	878809	NM_172321	282712	Rn.9716	NM_172321	ENSRNOG00000027468	Slc6a15	Ntt73	solute carrier family 6 member 15	protein-coding
MACS_peak_7213	chr4	44986412	44986707	+	18.07	NA	Intergenic	Intergenic	-14496	NM_001004102	296911	Rn.24435	NM_001004102	ENSRNOG00000056243	ST7	-	suppression of tumorigenicity 7	protein-coding
MACS_peak_10989	chrX	84854102	84854306	+	18.07	NA	Intergenic	L1_Rn|LINE|L1	-32429	NM_017067	24942	Rn.10191	NM_017067	ENSRNOG00000000161	Chm	-	CHM, Rab escort protein 1	protein-coding
MACS_peak_9863	chr8	70240233	70240437	+	18.07	NA	Intergenic	Intergenic	-24616	NM_031152	81830	Rn.1016	NM_031152	ENSRNOG00000011302	Rab11a	-	RAB11a, member RAS oncogene family	protein-coding
MACS_peak_604	chr1	114181892	114182223	+	18.07	NA	Intergenic	L1_Rat1|LINE|L1	-4796	NM_001107516	308663	Rn.65998	NM_001107516	ENSRNOG00000011480	Tubgcp5	-	tubulin, gamma complex associated protein 5	protein-coding
MACS_peak_3096	chr14	71771642	71771941	+	18.07	NA	Intergenic	L1_Rat1|LINE|L1	-17119	NM_013127	25668	Rn.11414	NM_013127	ENSRNOG00000003069	Cd38	ADPRC 1	CD38 molecule	protein-coding
MACS_peak_8229	chr5	124978765	124979086	+	18.07	NA	Intergenic	RNHAL1|LINE|L1	288711	NM_138905	192270	Rn.12038	NM_138905	ENSRNOG00000008116	Plpp3	Dri42|Ppap2b	phospholipid phosphatase 3	protein-coding
MACS_peak_1853	chr11	12872118	12872350	+	18.07	NA	Intergenic	L1_Rat1|LINE|L1	-626930	NM_024351	24468	Rn.120392	NM_024351	ENSRNOG00000034066	Hspa8	Hsc70	heat shock protein family A (Hsp70) member 8	protein-coding
MACS_peak_1429	chr10	5574987	5575199	+	18.07	NA	Intergenic	RNNICER2-int|LTR|ERV1	-41398	NM_001195471	497860	Rn.26687	NM_001195471	ENSRNOG00000032300	Rpl39l	-	ribosomal protein L39-like	protein-coding
MACS_peak_4888	chr19	29149295	29149618	+	18.07	NA	Intergenic	GA-rich|Low_complexity|Low_complexity	1191986	NM_053917	116699	Rn.10829	NM_053917	ENSRNOG00000018382	Inpp4b	-	inositol polyphosphate-4-phosphatase type II B	protein-coding
MACS_peak_6260	chr20	23391474	23392698	+	18.07	NA	Intergenic	(TCCTCCTGC)n|Simple_repeat|Simple_repeat	478437	NM_001106386	294375	Rn.1132	NM_001106386	ENSRNOG00000000645	Reep3	RGD1560401	receptor accessory protein 3	protein-coding
MACS_peak_4640	chr18	70803903	70804156	+	18.07	NA	Intergenic	(GATG)n|Simple_repeat|Simple_repeat	70157	NM_130433	170465	Rn.3786	NM_130433	ENSRNOG00000013766	Acaa2	-	acetyl-CoA acyltransferase 2	protein-coding
MACS_peak_9038	chr7	4526406	4526804	+	18.07	NA	Intergenic	RNHAL1|LINE|L1	8275	NM_001000696	404902	Rn.141027	NM_001000696		Olr1845	-	olfactory receptor 1845	protein-coding
MACS_peak_7904	chr5	34160478	34160709	+	18.07	NA	intron (NM_001109540, intron 6 of 6)	L1_Rn|LINE|L1	120335	NM_012960	25455	Rn.10260	NM_012960	ENSRNOG00000007351	Ggh	-	gamma-glutamyl hydrolase	protein-coding
MACS_peak_5475	chr2	97410033	97410253	+	18.07	NA	Intergenic	L1_Rat2|LINE|L1	-741921	NM_053772	114906	Rn.94808	NM_053772	ENSRNOG00000012095	Pkia	-	cAMP-dependent protein kinase inhibitor alpha	protein-coding
MACS_peak_8287	chr5	144297048	144297336	+	18.07	NA	Intergenic	(GAAG)n|Simple_repeat|Simple_repeat	15472	NM_001008376	362599	Rn.925	NM_001008376	ENSRNOG00000010550	Trappc3	-	trafficking protein particle complex 3	protein-coding
MACS_peak_8028	chr5	67717356	67717607	+	18.07	NA	Intergenic	Intergenic	267827	NM_201271	298062	Rn.215023	NM_201271	ENSRNOG00000007575	Plppr1	Lppr1|Prg-3	phospholipid phosphatase related 1	protein-coding
MACS_peak_1110	chr1	215471655	215471879	+	18.07	NA	Intergenic	RNLTR3a-int|LTR|ERVK	11541	NM_001109474	685544	Rn.218514	NM_001109474	ENSRNOG00000020131	LOC685544	-	hypothetical protein LOC685544	protein-coding
MACS_peak_10600	chrUn_KL568383v1	6180	6471	+	18.07	NA	NA	MTB_Rn|LTR|ERVL-MaLR	NA	NA
MACS_peak_10681	chrX	9184255	9184473	+	18.02	NA	Intergenic	RatSatRep2|Unknown|Unknown	-631288	NM_022184	29647	Rn.72627	NM_022184	ENSRNOG00000060946	Cask	-	calcium/calmodulin dependent serine protein kinase	protein-coding
MACS_peak_9295	chr7	54962243	54962799	+	18.02	NA	Intergenic	L1_Rn|LINE|L1	-17599	NM_139216	246153	Rn.9733	NM_139216	ENSRNOG00000004077	Kcnc2	KShIIIA|Kv3.2	potassium voltage-gated channel subfamily C member 2	protein-coding
MACS_peak_1881	chr11	20854694	20854897	+	18.02	NA	Intergenic	RatSatRep2|Unknown|Unknown	632738	NM_203409	288280	Rn.138756	NM_203409	ENSRNOG00000002126	Ncam2	OCAM-GPI|Ocam	neural cell adhesion molecule 2	protein-coding
MACS_peak_2024	chr11	56183156	56183545	+	18.02	NA	Intergenic	RatSatRep2|Unknown|Unknown	686116	NM_001000771	405046	Rn.142123	NM_001000771	ENSRNOG00000045676	Olr1455	-	olfactory receptor 1455	protein-coding
MACS_peak_7253	chr4	53553848	53554267	+	18.02	NA	Intergenic	RatSatRep2|Unknown|Unknown	-1203433	NM_001109480	685756	Rn.28477	NM_001109480	ENSRNOG00000039464	Tmem229a	-	transmembrane protein 229A	protein-coding
MACS_peak_4562	chr18	51728752	51729465	+	18.02	NA	Intergenic	RatSatRep2|Unknown|Unknown	49340	NM_001109126	498870	Rn.215600	NM_001109126	ENSRNOG00000023034	Tex43	RGD1561039	testis expressed 43	protein-coding
MACS_peak_3346	chr15	19134905	19135209	+	18.02	NA	Intergenic	L1_Rat1|LINE|L1	147696	NM_001014069	313588	Rn.8811	NM_001014069	ENSRNOG00000046920	Snip1	-	Smad nuclear interacting protein 1	protein-coding
MACS_peak_8766	chr6	87084511	87084884	+	18.02	NA	Intergenic	L1_Rn|LINE|L1	-160397	NM_001109531	689296	Rn.178359	NM_001109531	ENSRNOG00000023093	Mis18bp1	RGD1305497	MIS18 binding protein 1	protein-coding
MACS_peak_4579	chr18	53474814	53475722	+	18.02	NA	Intergenic	L1_Rn|LINE|L1	-134229	NM_001106145	291582	Rn.53815	NM_001106145	ENSRNOG00000058193	Slc27a6	-	solute carrier family 27 member 6	protein-coding
MACS_peak_11567	chrY_KL568162v1_random	10838029	10838326	+	18.02	NA	NA	L1_Rn|LINE|L1	NA	NA
MACS_peak_147	chr1	25039802	25040017	+	18.02	NA	Intergenic	L1_Rat1|LINE|L1	-133180	NM_001108459	361459	Rn.230112	NM_001108459		Clvs2	Clavesin-2|RGD1306801|Rlbp1l2	clavesin 2	protein-coding
MACS_peak_7205	chr4	44374063	44374586	+	18.02	NA	Intergenic	RatSatRep2|Unknown|Unknown	52441	NM_001039344	500040	Rn.44847	NM_001039344	ENSRNOG00000051952	Tes	-	testin LIM domain protein	protein-coding
MACS_peak_3564	chr15	75484853	75485422	+	18.02	NA	Intergenic	L1_Rn|LINE|L1	2251638	NM_001191688	306091	Rn.232343	NM_001191688		Pcdh9	-	protocadherin 9	protein-coding
MACS_peak_3977	chr16	78093297	78093619	+	17.98	NA	intron (NM_001037327, intron 5 of 67)	RatSatRep2|Unknown|Unknown	940635	NM_001037327	364634	Rn.137916	NM_001037327	ENSRNOG00000030719	Csmd1	Mdcr1	CUB and Sushi multiple domains 1	protein-coding
MACS_peak_11083	chrX	111967784	111968140	+	17.98	NA	Intergenic	L1_Rat1|LINE|L1	-52603	NM_001191889	363502	Rn.15520	NM_001191889	ENSRNOG00000060542	Mid2	RGD1565674	midline 2	protein-coding
MACS_peak_10133	chr9	8026272	8026547	+	17.98	NA	Intergenic	RNHAL1|LINE|L1	-29643	NM_001007558	450235	Rn.162355	NM_001007558	ENSRNOG00000050325	Adgre4	Adgre4p|Emr4|Emr4p	adhesion G protein-coupled receptor E4	protein-coding
MACS_peak_3090	chr14	70076713	70076922	+	17.98	NA	intron (NM_001305171, intron 12 of 15)	RatSatRep2|Unknown|Unknown	21204	NM_001107217	305391	Rn.34860	NM_001107217	ENSRNOG00000003592	Med28	Eg1|FKSG20|RGD1305875	mediator complex subunit 28	protein-coding
MACS_peak_9301	chr7	56767752	56768100	+	17.98	NA	Intergenic	L1_Rn|LINE|L1	911869	NM_001108991	366894	Rn.23393	NM_001108991	ENSRNOG00000005278	Trhde	PAP-II	thyrotropin-releasing hormone degrading enzyme	protein-coding
MACS_peak_10856	chrX	45235273	45235517	+	17.98	NA	Intergenic	RatSatRep2|Unknown|Unknown	22183	NM_138903	192267	Rn.9718	NM_138903	ENSRNOG00000049515	Obp1f	Obp-1f	odorant binding protein I f	protein-coding
MACS_peak_10828	chrX	41348576	41348921	+	17.98	NA	Intergenic	RatSatRep2|Unknown|Unknown	888701	NM_013004	25512	Rn.37861	NM_013004	ENSRNOG00000023440	Phex	PEX	phosphate regulating endopeptidase homolog, X-linked	protein-coding
MACS_peak_285	chr1	54639505	54640059	+	17.98	NA	Intergenic	RatSatRep2|Unknown|Unknown	23113	NM_001099463	685557	Rn.217943	NM_001099463		Vom2r7	-	vomeronasal 2 receptor, 7	protein-coding
MACS_peak_2246	chr12	17434858	17435429	+	17.97	NA	intron (NM_133567, intron 2 of 10)	ZP3AR|Satellite|Satellite	18816	NM_133567	171097	Rn.10539	NM_133567	ENSRNOG00000054033	Adap1	Centa1|p42IP4	ArfGAP with dual PH domains 1	protein-coding
MACS_peak_3677	chr16	854959	855158	+	17.97	NA	Intergenic	RatSatRep2|Unknown|Unknown	75469	NM_001024796	361217	Rn.199017	NM_001024796	ENSRNOG00000011119	Spin1	Spin	spindlin 1	protein-coding
MACS_peak_57	chr1	11937298	11937609	+	17.94	NA	Intergenic	Intergenic	-22913	NM_001025002	310926		NM_001025002		LOC310926	Aa1011|Aa1262|Ab2-057|Ac1147	hypothetical protein LOC310926	protein-coding
MACS_peak_9229	chr7	37903479	37903697	+	17.92	NA	Intergenic	RatSatRep2|Unknown|Unknown	90757	NM_017258	29618	Rn.1000	NM_017258	ENSRNOG00000004284	Btg1	-	BTG anti-proliferation factor 1	protein-coding
MACS_peak_4239	chr17	52192557	52192795	+	17.91	NA	Intergenic	L1_Rn|LINE|L1	-280253	NM_017128	29200	Rn.9874	NM_017128	ENSRNOG00000014320	Inhba	-	inhibin beta A subunit	protein-coding
MACS_peak_5127	chr2	11008669	11008885	+	17.91	NA	Intergenic	RNHAL1|LINE|L1	-875894	NR_031813	100313995		NR_031813		Mir9-2	Mir9a-2|rno-mir-9-2|rno-mir-9a-2	microRNA 9-2	ncRNA
MACS_peak_7357	chr4	72596566	72596921	+	17.89	NA	Intergenic	RatSatRep2|Unknown|Unknown	-6499	NM_001000844	405133	Rn.143107	NM_001000844	ENSRNOG00000049389	Olr818	-	olfactory receptor 818	protein-coding
MACS_peak_4078	chr17	11795420	11795632	+	17.89	NA	Intergenic	Intergenic	-60999	NM_001108406	361213	Rn.18996	NM_001108406	ENSRNOG00000010882	Sptlc1	Lcb1|RGD1306617|Spt1	serine palmitoyltransferase, long chain base subunit 1	protein-coding
MACS_peak_5680	chr2	152068755	152068957	+	17.89	NA	Intergenic	L1_Rn|LINE|L1	383605	NM_133410	170923	Rn.217110	NM_133410	ENSRNOG00000014420	Rap2b	-	RAP2B, member of RAS oncogene family	protein-coding
MACS_peak_92	chr1	17157120	17157360	+	17.89	NA	Intergenic	RNHAL1|LINE|L1	247150	NM_001191088	685750		NM_001191088	ENSRNOG00000014907	Aldh8a1	-	aldehyde dehydrogenase 8 family, member A1	protein-coding
MACS_peak_7878	chr5	28163303	28163583	+	17.89	NA	intron (NM_001134624, intron 7 of 7)	L1_Rn|LINE|L1	-32310	NM_001106638	297910	Rn.109484	NM_001106638	ENSRNOG00000006096	Slc26a7	-	solute carrier family 26 member 7	protein-coding
MACS_peak_1682	chr10	82504264	82504902	+	17.86	NA	Intergenic	L1_Rn|LINE|L1	-105098	NM_022296	64134	Rn.22727	NM_022296	ENSRNOG00000003728	Xylt2	xylt-II	xylosyltransferase 2	protein-coding
MACS_peak_10142	chr9	8424511	8424963	+	17.86	NA	Intergenic	Intergenic	368685	NM_001007558	450235	Rn.162355	NM_001007558	ENSRNOG00000050325	Adgre4	Adgre4p|Emr4|Emr4p	adhesion G protein-coupled receptor E4	protein-coding
MACS_peak_8142	chr5	101814468	101814672	+	17.86	NA	Intergenic	L1_Rn|LINE|L1	-226472	NM_175765	313323	Rn.93075	NM_175765	ENSRNOG00000011498	Psip1	Ledgf|Psip2|SBP75	PC4 and SFRS1 interacting protein 1	protein-coding
MACS_peak_5798	chr2	178725103	178725480	+	17.86	NA	intron (NM_199105, intron 3 of 4)	RatSatRep2|Unknown|Unknown	46250	NM_199105	310540	Rn.20514	NM_199105	ENSRNOG00000010183	Fam198b	Ened	family with sequence similarity 198, member B	protein-coding
MACS_peak_10833	chrX	42140154	42140440	+	17.86	NA	Intergenic	L1_Rn|LINE|L1	-418615	NM_001191734	317517	Rn.231432	NM_001191734	ENSRNOG00000003675	Ptchd1	RGD1564527	patched domain containing 1	protein-coding
MACS_peak_10559	chr9	120746567	120746847	+	17.86	NA	Intergenic	RatSatRep2|Unknown|Unknown	873166	NM_001191814	316731	Rn.162281	NM_001191814	ENSRNOG00000026280	Mettl4	RGD1306451	methyltransferase like 4	protein-coding
MACS_peak_10498	chr9	102613233	102614119	+	17.84	NA	Intergenic	RatSatRep2|Unknown|Unknown	-249214	NM_001012350	301634	Rn.22362	NM_001012350	ENSRNOG00000019087	Fam174a	Fam174|RGD1309973|Tmem157	family with sequence similarity 174, member A	protein-coding
MACS_peak_704	chr1	146200619	146200865	+	17.84	NA	Intergenic	L1_Rn|LINE|L1	88723	NM_001100736	361601	Rn.198511	NM_001100736	ENSRNOG00000012683	Abhd17c	Fam108c1|RGD1308210	abhydrolase domain containing 17C	protein-coding
MACS_peak_11134	chrX	124049640	124049871	+	17.84	NA	Intergenic	L1_Rat1|LINE|L1	-56213	NM_001025654	298353	Rn.144870	NM_001025654		Rhox7	-	Rhox homeobox family member 7	protein-coding
MACS_peak_6450	chr3	16912851	16913070	+	17.84	NA	Intergenic	L1_Rn|LINE|L1	594531	NM_001000969	405322	Rn.143029	NM_001000969	ENSRNOG00000048499	Olr410	-	olfactory receptor 410	protein-coding
MACS_peak_11477	chrY_KL568160v1_random	409518	410034	+	17.82	NA	NA	RatSatRep2|Unknown|Unknown	NA	NA
MACS_peak_8371	chr5	161384702	161384937	+	17.82	NA	Intergenic	RatSatRep2|Unknown|Unknown	-349280	NM_001014070	313672	Rn.3753	NM_001014070	ENSRNOG00000014322	Kazn	Kaz	kazrin, periplakin interacting protein	protein-coding
MACS_peak_4072	chr17	11754104	11754367	+	17.82	NA	Intergenic	Intergenic	70373	NM_012982	25483	Rn.10414	NM_012982	ENSRNOG00000018355	Msx2	-	msh homeobox 2	protein-coding
MACS_peak_7976	chr5	54455944	54456220	+	17.78	NA	Intergenic	RatSatRep2|Unknown|Unknown	26077	NM_001014062	313163	Rn.107841	NM_001014062	ENSRNOG00000031013	RGD1306195	-	similar to RAN protein	protein-coding
MACS_peak_7973	chr5	53859906	53860165	+	17.78	NA	Intergenic	RatSatRep2|Unknown|Unknown	622124	NM_001014062	313163	Rn.107841	NM_001014062	ENSRNOG00000031013	RGD1306195	-	similar to RAN protein	protein-coding
MACS_peak_10000	chr8	106192128	106192337	+	17.78	NA	Intergenic	RatSatRep2|Unknown|Unknown	-125147	NM_001013224	363118	Rn.101356	NM_001013224	ENSRNOG00000013585	Nmnat3	-	nicotinamide nucleotide adenylyltransferase 3	protein-coding
MACS_peak_8897	chr6	125217131	125217357	+	17.78	NA	Intergenic	L1_Rat1|LINE|L1	-134252	NM_001108050	314388	Rn.22873	NM_001108050	ENSRNOG00000027773	Ppp4r3a	RGD1309059|Smek1	protein phosphatase 4, regulatory subunit 3A	protein-coding
MACS_peak_6310	chr20	40355418	40355701	+	17.78	NA	intron (NM_001106392, intron 3 of 5)	L1_Rat1|LINE|L1	119122	NM_001106392	294449	Rn.19322	NM_001106392	ENSRNOG00000000605	Hs3st5	-	heparan sulfate-glucosamine 3-sulfotransferase 5	protein-coding
MACS_peak_5733	chr2	161555430	161555676	+	17.78	NA	Intergenic	LSU-rRNA_Hsa|rRNA|rRNA	2571230	NM_013028	25546	Rn.11258	NM_013028	ENSRNOG00000012478	Shox2	-	short stature homeobox 2	protein-coding
MACS_peak_11230	chrX	153479152	153479400	+	17.78	NA	Intergenic	L1_Rat1|LINE|L1	-22266	NM_001106351	689600	Rn.62289	NM_001106351	ENSRNOG00000057651	LOC689600	-	hypothetical protein LOC689600	protein-coding
MACS_peak_9362	chr7	74378056	74378308	+	17.78	NA	intron (NM_001134886, intron 24 of 61)	L1_Rat1|LINE|L1	45123	NR_032755	100314134		NR_032755	ENSRNOG00000041348	Mir875	rno-mir-875	microRNA 875	ncRNA
MACS_peak_741	chr1	154328200	154328515	+	17.78	NA	Intergenic	L1_Rn|LINE|L1	-49148	NM_053554	89816	Rn.24871	NM_053554	ENSRNOG00000018322	Picalm	Calm	phosphatidylinositol binding clathrin assembly protein	protein-coding
MACS_peak_7736	chr4	172373302	172373525	+	17.78	NA	Intergenic	RatSatRep2|Unknown|Unknown	254031	NM_134349	171341	Rn.2580	NM_134349	ENSRNOG00000007743	Mgst1	-	microsomal glutathione S-transferase 1	protein-coding
MACS_peak_5461	chr2	94047303	94047567	+	17.78	NA	Intergenic	(CACCAC)n|Simple_repeat|Simple_repeat	-62116	NM_145878	140868	Rn.98269	NM_145878	ENSRNOG00000049075	Fabp5	C-FABP|DA11|E-FABP	fatty acid binding protein 5	protein-coding
MACS_peak_11334	chrY_KL568141v1_random	483913	484125	+	17.78	NA	NA	L1_Rn|LINE|L1	NA	NA
MACS_peak_6859	chr3	130350109	130350335	+	17.78	NA	Intergenic	RatSatRep1|Satellite|Satellite	-235441	NM_019147	29146	Rn.88804	NM_019147	ENSRNOG00000007443	Jag1	-	jagged 1	protein-coding
[truncated: 9,640 more rows]

## Sheet: peaks with distance to TSS +_10
PeakID (cmd=annotatePeaks.pl H1T2_peaks.bed rn6 -annStats stat_H1T2_peaks)	Chr	Start	End	Strand	Peak Score	Focus Ratio/Region Size	Annotation	Detailed Annotation	Distance to TSS	Nearest PromoterID	Entrez ID	Nearest Unigene	Nearest Refseq	Nearest Ensembl	Gene Name	Gene Alias	Gene Description	Gene Type
[truncated: 1,655 more rows]
