# Supplementary material for: Genome-wide occupancy reveals the localization of H1T2 (H1fnt) to repeat regions and a subset of transcriptionally active chromatin domains in rat spermatids
Source: Epigenetics Chromatin. 2021 Jan 6;14:3. doi: 10.1186/s13072-020-00376-2 (PMC7788777; doi:10.1186/s13072-020-00376-2)
Supplement: Supplementary file 6 — Additional file 6: Table S4. Representative excel file of the fold enrichment of H1T2 peaks across chromosomes. [file 13072_2020_376_MOESM6_ESM.xlsx]

## Sheet: Sheet1
WG	chr1	chr2	chr3	chr4	chr5	chr6	chr7	chr8	chr9	chr10	chr11	chr12	chr13	chr14	chr15	chr16	chr17	chr18	chr19	chr20	chrX	chrY	chrM
4.44	4.44	3.98	3.65	4.84	9.85	7.26	9.67	3.71	3.45	3.87	11.29	3.91	10.55	3.63	3.87	12.09	3.93	4.66	4.84	5.36	5.89	3.87	2.21
5.03	5.03	3.79	5.46	8.06	7.26	4.1	7.26	6.65	5.69	6.37	6.73	3.5	4.34	2.88	6.11	5.73	7.04	5.42	7.52	3.98	7.09	7.95	2.11
5.76	5.76	3.87	8.19	6.77	8.49	4.59	5.18	9.27	6.01	5.13	5.7	3.11	3.76	3.75	3.75	4.26	7.26	4.13	4.02	4.84	6.05	4.24	2.04
10.89	10.89	2.29	7.2	9.68	8.68	5.53	4.83	6.16	8.6	10.12	5.21	2.27	9.07	7.95	10.89	3.27	4.7	10.89	2.7	6.19	4.9	3.84	2.22
4.02	4.02	4.4	2.96	4.84	6.96	5.89	5.81	7.03	8.47	4.4	3.96	7.6	7.26	7.08	9.14	11.38	5.84	8.02	2.68	3.51	6.65	9.59	2.21
8.35	8.35	3.11	6.45	7.4	4.61	4.84	5.85	4.84	4.15	2.65	4.3	6.7	4.42	5.18	5.67	6.05	5.28	12.58	1.86	4.84	4.84	7.09	2.41
5.96	5.96	2.33	6.17	6.62	3.52	5.3	4.1	6.77	4.61	4.66	3.33	4.15	13.95	2.96	8.5	7.26	9.68	3.85	6.58	14.51	9.67	8.47	1.96
8.47	8.47	6.96	6.77	5.37	20.56	10.89	3.5	5.47	11.16	8.07	4.84	6.11	6.45	7.91	8.41	7.8	10.75	4.4	2	2.8	5.37	4.51	2.16
5.55	5.55	4.21	8.47	5.09	7.4	12.09	3.22	8.4	4.64	6.65	9.67	3.24	7.44	6.31	6.58	7.02	10.88	9.19	6.79	5.02	7.99	3.87
6.45	6.45	4.67	6.45	8.84	10.89	6.05	2.18	5.72	2.27	3.13	7.66	7.03	6.45	5.77	5.37	10.36	5.6	4.88	2.7	11.13	4.94	3.75
3.87	3.87	2.7	7.26	7.4	5.91	6.6	2.58	3.94	6.77	7.26	6.91	8.47	8.32	9.24	4.84	4.61	4.23	4.84	2.9	4.18	3.95	3.9
4.84	4.84	4.34	7.26	5.46	8.71	5.66	3.6	9.67	5.64	6.29	8.18	2.55	7.25	10.54	8.47	5.96	10.89	6.05	3.1	9.07	3.55	4.57
5.5	5.5	3.87	8.47	4.59	9.48	5.37	7.81	9.36	4.23	7.39	7.13	2.4	10.44	3.97	4.84	3.35	10.42	13.82	8.47	4.58	4.44	4.15
3.94	3.94	3.36	7.26	3.48	7.77	5.44	7.99	6.39	4.65	6.03	6.91	4.53	4.46	4.99	4.35	9.44	8.47	6.6	7.56	4.43	5.27	6.86
6.28	6.28	2.59	9.21	3.56	4.19	5.53	3.76	6.51	4.73	5.48	4.03	7.26	4.46	8.47	5.47	13.31	8.47	6.45	5.58	4.84	8.22	2.88
4.35	4.35	3.33	7.36	5.26	10.89	4.06	3.22	4.84	4.84	6.05	3.32	5.28	9.68	9.68	3.27	9.68	5.95	5.46	2.42	10.99	6.32	4.73
5.53	5.53	5.02	9.67	5.18	6.72	4.84	5.05	5.86	6.58	3.5	6.96	3.7	8.32	9	2.37	6.05	7.26	9.67	6.11	10.16	10.99	7.26
4.84	4.84	4.89	6.77	4.84	9.68	4.72	3.22	3.97	6.17	12.09	4.46	4.57	4.4	7.44	2.46	7.52	8.46	7.26	8.46	13.13	3.87	8.1
6.05	6.05	3.8	10.88	9.68	6.77	4.15	4.61	5.28	4.51	10.89	6.77	8.47	6.29	8.25	7.6	11.29	4.85	6.45	5.37	6.03	4.84	4.84
10.32	10.32	6.86	4.56	9.67	10.04	6.83	2.72	3.1	6.65	4.76	2.73	3.22	9.97	3.85	2.72	7.26	6.45	9.68	9.67	3.8	7.25	7.2
10.55	10.55	3.63	6.45	5.8	2.46	3.16	3.76	7.4	6.33	4.06	6.13	3.07	6.77	7.17	3.56	6.45	7.08	7.09	3.29	4.23	11.61	8.46
8.47	8.47	7	6.91	3.72	5.73	5.99	6.77	5.29	3.02	7.74	5.49	3.2	6.77	4.35	10.55	3.76	10.89	5.37	5.18	39.92	2.76	6.65
5.24	5.24	3	4.28	5.91	3.97	6.99	3.96	8.79	5.16	6.42	4.99	2.29	9.07	5.53	6.45	7.26	6.77	7.47	3.98	6.8	4.84	9.21
7.09	7.09	3.56	2.33	7.74	5.09	5.58	4.68	5.95	6.77	9.67	7.74	2.86	8.6	8.06	9.68	4.3	7.26	6.87	2.2	6.63	4.69	7.37
7.66	7.66	6.26	5.11	9.68	5.04	7.26	3.75	7.26	3.8	9.68	5.09	3.04	3.87	4.84	5.54	4.84	7.26	7.26	4.01	6.05	6.16	2.16
5	5	3.86	6.45	7.26	8.47	8.47	2.84	4.98	5.07	6.05	13.82	3.24	2.78	3.8	5.91	6.91	3.63	7.93	4.93	5.98	4.43	7.74
2.55	2.55	3.9	9.68	9.68	8.29	4.03	7.91	6.34	4.61	4.3	10.89	2.78	4.3	5.22	4.84	5.44	6.45	8.47	3.19	4.81	10.89	26.55
3.72	3.72	6.81	8.46	6.05	6.45	10.21	5.56	7.64	5.69	8.47	4.84	12.58	4.43	3.84	3.22	3.55	6.31	6.6	3.13	3.44	4.68	5.56
8.46	8.46	4.33	5.8	7.74	5.15	8.47	3.35	3.87	2.98	8.26	3.14	6.22	4.5	4.67	9.35	3.22	7.26	4.23	3.22	4.65	7.52	8.88
8.46	8.46	8.18	9.68	4.15	8.71	2.66	7.52	3.87	7.79	7.26	3.8	9.67	6.26	8.47	4.21	4.55	6.05	3.72	2.62	6.29	3.65	4.03
6.29	6.29	4.57	6.05	2.55	8.47	6.99	7.82	8.46	6.77	13.31	8.46	7.25	7.3	7.09	3.7	6.26	14.51	6.54	2.24	3.72	2.7	7.74
5.72	5.72	3.8	5.8	5.69	6.77	9	7.5	4.84	7.44	7.25	4.15	1.51	4.37	7.26	7.42	3.52	5.8	4.67	6.38	4.84	6.12
12.1	12.1	6.65	6.45	7.97	3.68	4.19	3.87	2.45	10.89	9.67	12.28	9.68	5.8	4.84	5.89	7.2	7.26	4.06	4.93	9.67	6.7
7.25	7.25	6.59	9.68	7.69	10.21	9.67	4.39	5.44	8.71	6.45	6.45	7.25	4.24	7.25	8.47	7.26	12.1	6.91	14.66	9.67	9.09
5.09	5.09	8.2	3.83	4.02	5.37	9.67	9.67	4.84	13.31	7.74	6.14	12.09	4.75	12.09	7.74	6.07	6.77	7.9	7.6	9.67	5.03
9.14	9.14	6.16	10.88	2.46	3.22	5.21	9.67	3.56	9.07	7.08	7.9	8.47	5.91	6.45	10.08	6.22	8.71	9.67	9.67	5.37	6.39
6.79	6.79	8.58	6.05	7.26	5.05	5.72	7.26	5.07	10.64	5.45	13.3	6.45	11.25	6.77	3.81	5.72	8.47	9.38	11.91	5.44	5.53
5.74	5.74	6.16	8.47	7.26	5.89	4.12	7.26	9.68	6.97	7.26	2.89	9.44	5.64	7.26	4.03	8.52	6.83	3.47	5.8	9.68	4.63
4.3	4.3	5.91	8.06	8.46	8.6	3.98	4.46	3.45	3.83	6.16	4.84	9.68	5.53	5.62	5.23	5.86	6.45	6.05	8.71	3.72	10.89
4.21	4.21	7.25	5.21	7.26	8.71	2.79	7.74	4.46	3.5	3.87	3.97	7.26	5.64	4.84	3.85	3.72	4.94	3.56	9.67	8.54	5.16
4.21	4.21	10.36	8.47	6.16	4.07	4	6.05	2.93	5.37	6.77	12.1	9.68	5.85	6.05	5.62	5.8	2.59	4.1	4.4	6.16	8.46
5.61	5.61	3.14	8.47	9.68	7.38	3.54	5.8	7.05	9.68	4.84	4.62	5.21	8.98	4.84	2.96	2.92	3.24	2.34	5.89	7.26	4.3
7.92	7.92	8.2	6.05	7.49	4.63	8.71	3.7	7.15	8.41	10.89	6.7	6.31	6.91	2.88	5.72	3.09	2.07	6.26	4.84	3.87	8.06
3.6	3.6	6.8	6.45	6.75	7.6	9.68	4.49	8.47	9.03	7.25	5.34	9.92	4.3	8.71	8.47	2.6	2.23	8.98	10.88	9.68	6.99
4.98	4.98	2.85	3.12	14.51	5.58	8.79	5.74	6.65	6.02	7.26	7.74	6.22	3.66	5.28	4.23	2.91	2.2	8.47	6.5	6.91	3.22
4.9	4.9	8.65	9.44	8.06	2.96	5.64	7.25	5.8	3.37	8.47	10.73	6.05	6.05	6.39	6.05	2.82	5.19	9.67	10.51	8.47	5.86
2.2	2.2	3.22	4.84	7.64	7.03	6.45	7.26	7.26	2.4	5.44	7.77	6.68	3.63	5.99	2.9	10.18	4.24	6.7	8.79	10.62	7.25
3.59	3.59	6.67	12.1	6.22	7.6	5.64	13.3	4.03	4.48	7.81	4	14.78	4.84	8.47	7.15	2.52	2.94	3.74	6.17	9.67	4.84
2.76	2.76	8.96	6.91	6.91	5.16	8.47	13.95	7.25	4.57	5.8	6.26	9.52	4.84	5.21	5.05	6.11	5.67	4.35	3.87	7.25	5.18
2.58	2.58	3.93	7.91	7.47	13.7	4.61	4.64	5.72	3.46	8.26	5.63	5.86	6.05	9.67	7.33	9.02	8.47	3.63	7.64	5.95	7.6
3.37	3.37	5.18	9.68	5.02	4.18	8.47	6.45	4.76	7.11	5.69	5.62	6.04	3.14	21.39	3.68	12.09	7.25	10.89	7.26	3.52	9.68
5.8	5.8	4.43	7.44	8.06	6.05	7.87	4.24	7.09	1.98	5.53	3.54	12.09	9.67	9.21	11.61	4.84	9.68	11.05	7.52	4.91	5.53
2.24	2.24	4.35	7.03	6.91	3.61	4.46	5.02	4.84	3.62	9.68	3.63	9.67	9	6.45	9.68	9	3.87	8.46	7.26	4.84	3.72
4.06	4.06	4.84	7.26	8.26	4.84	6.51	4.84	8.58	3.06	8.47	12.9	6	5.64	3.91	9.67	9.67	7.25	8.87	6.05	4.84	6.13
2.3	2.3	5.74	8.46	3.93	8.06	10.89	8.37	3.63	3.99	5.12	3.28	14.03	5.32	7.52	9.68	9.68	32.66	7.74	8.23	2.99	8.98
4.64	4.64	7.91	10.88	6.29	5.28	15.48	5.69	5.53	5.23	8.23	2.47	7.74	4.61	7.03	2.58	7.2	7.26	5.44	6.05	3.45	6.26
2.23	2.23	10.46	4.15	4.11	5.18	3.36	3.91	5.91	3.22	5.76	5.19	6.45	4.51	6.45	5.95	7.91	7.74	12.09	10.88	2.76	3.8
3.18	3.18	7.6	6.77	4.49	5.95	5.8	7.25	7.71	3.44	6.91	8.93	10.88	6.59	4.24	4.58	7.25	6.22	6.05	4.42	3.79	4.53
2.47	2.47	5.91	8.47	4.06	7.6	6.11	4.21	11.43	4.21	9.68	7.57	3.43	5.32	6.4	13.92	5.69	8.18	3.83	5.21	2.64	2.53
2.89	2.89	6.91	7.26	4.17	6.85	5.09	4.51	6.56	3.79	9.87	8.46	5.74	10.21	4.03	4.27	7.74	7.03	6.05	5.05	4.3	5.64
3.09	3.09	4.66	8.71	3.53	3.35	5.21	4.51	5.44	6.6	4.4	4.84	6.05	3.8	8.94	6.65	8.47	3.6	7.13	5.8	5.15	4.51
2.8	2.8	6.99	14.51	6.45	5.12	4.84	3.09	10.29	7.67	9.68	4.64	6.22	13.97	7.26	6.85	8.23	3.63	5.43	5.53	2.37	4.27
4.48	4.48	9.68	8.47	5.44	4.75	3.63	9.84	8.46	5.64	6.64	4.46	7.26	5.58	7.25	8.54	6.36	6.24	5.8	10.48	2.14	3.94
2.08	2.08	5.66	9.68	8.22	3.1	5.02	5.44	4.84	13.02	7.25	5.28	8.47	3.98	7.25	4.27	7.52	5.95	9.67	8.47	4.84	6.66
4.62	4.62	3.45	4.23	6.45	3.87	5.05	3.52	5.44	7.26	6.45	6.13	4.61	5.91	7.25	7.64	8.47	10.55	10.89	8.47	7.26	4.12
3.25	3.25	3.33	6.77	10.03	4.15	9.67	7.48	5.84	7.44	6.05	5.72	7.26	3.76	9.68	3.52	4.23	3.68	8.54	3.33	8.6	5.07
4.27	4.27	2.67	6.22	7.5	11.32	3.72	16.23	4.49	10.89	8.47	6.91	10.88	5.21	3.77	5.95	7.26	5.03	4.97	8.29	9.68	4.3
2.04	2.04	3.76	4.3	4.51	5.8	5.94	3.68	4.84	6.16	5.53	2.58	8.47	12.1	8.29	10.64	10.89	8.21	4.19	4.57	5.58	4.7
5.87	5.87	6.31	4.4	6.34	7.68	5.73	4.64	9.67	7.52	8.47	4.46	8.88	6.65	4.84	5.09	8.47	10.88	5.09	5.22	2.99	9.68
4.97	4.97	3.98	8.79	4.84	6.83	7.98	3.29	2.98	6.64	5.8	13.82	5.26	4.84	6.51	8.47	8.41	5.91	7.26	8.47	3.72	3.49
3.11	3.11	9.04	5.91	6.65	6.05	7.26	3.87	9.67	6.45	8.71	4.95	5.95	8.98	5.88	4.84	9.68	5.92	10.89	12.73	6.45	4.53
4.26	4.26	4.15	8.91	10.64	9.14	6.55	5.18	9.68	4.23	9.67	6.6	8.6	10.84	5.8	8.6	8.46	4.4	4.84	3.52	4.84	5.8
7.07	7.07	3.54	4.72	2.49	9.68	3.16	8.46	4.46	2.9	3.74	4.74	7.26	8.71	6.87	10.15	5.95	7.37	7.52	5.12	4.84	7.42
5.3	5.3	11.43	6.73	6.76	4.61	5.8	7.26	7.26	3.87	9.67	6.22	7.52	4.84	5.29	7.44	9.68	6.16	4.09	5.83	6.75	7.97
6.29	6.29	5.66	6.54	5	7.5	4.84	9.67	7.52	4.47	3.45	8.47	6.45	13.26	8.47	6.13	7.26	4.63	8.21	2.76	9.68	9.85
14.51	14.51	7.02	8.93	3.76	7.74	5.74	7.26	10.89	8	7.26	5.32	6.45	4.64	3.95	6.45	12.1	3.87	4.07	7.15	2.45	8.98
10.89	10.89	8.71	3.35	3.87	5.04	6.11	10.7	8.47	2.92	9.67	7.83	7.26	13.54	8.6	4.63	6.45	8.62	3.5	5.8	3.68	7.26
6.23	6.23	10.89	5.69	7.25	7.26	8.47	5.8	6.05	1.63	8.87	3.87	12.25	6.65	6.91	6.05	7.03	15.72	9.1	7.5	9	8.87
7.26	7.26	7.09	2.55	6.45	3.82	4.15	7.06	8.46	4.51	4.84	6.99	4.84	7.28	3.85	5.37	8.47	6.05	6.24	4.35	3.74	8.22
8.34	8.34	5.28	3.6	8.38	6.65	7.74	7.26	6.27	4.84	6.91	14.61	6.77	5.37	7.64	7.25	8.06	5.99	5.18	3.52	2.21	10.55
8.47	8.47	6.77	9.67	8.41	10.88	5.24	6.27	5.21	5.74	8.47	7.74	8.46	7.26	6.21	6	12.09	9.67	7.93	8.47	6	6.91
8.47	8.47	6.91	8.74	5	5.64	7.26	6.05	7.52	2.27	5.32	9.67	7.26	8.46	8.6	9.68	3.22	4.35	9.68	6.7	7.28	4.53
5.48	5.48	6.45	5.53	4.42	4.69	5.64	5.21	5.46	2.45	7.66	2.7	7.26	4.3	4.84	8.47	2.62	5.32	7.52	2.6	7.25	6.25
3.52	3.52	4.84	8.06	5.72	5.6	8.47	6.05	5.53	2.85	6.05	6.19	8.47	5.8	3.36	4.23	2.42	7.87	5.09	8.47	6.05	6.59
8.15	8.15	9.67	7.52	5.09	9.67	8.46	5.28	9.67	1.69	8.47	3.01	6.45	6.16	12.36	6.59	2.67	7.6	4.84	3.22	7.26	10.64
7.25	7.25	6.77	4	13.9	7.74	8.47	6.6	8.71	2.85	3.96	8.71	9.67	4.49	9.27	3.67	3.39	10.48	8.71	4.43	13.31	8.06
3.8	3.8	6.98	8.71	3.29	7.6	3.63	6.05	5.95	3.17	7.13	3.04	4.84	6.91	8.47	5.65	3.97	7.25	9.68	4.84	8.47	3.45
4.7	4.7	4.79	4.61	11.82	6.05	4.3	7.26	9.06	4.58	2.88	10.89	8.46	4.58	5.64	5.8	2.56	8.47	4.09	6.05	6.05	5.95
7.6	7.6	3.6	15.2	5.72	9.4	4.09	8.47	5.54	4.73	7.6	7.03	9.68	18.14	8.38	6.91	3.89	6.05	4.06	7.25	6.16	14.51
5.31	5.31	5.35	7.58	5.37	8.54	2.42	5.69	6.65	5.9	6.05	6.77	7.26	4.15	7.59	5.24	3.97	7.25	2.76	8.47	8.46	5.76
4.55	4.55	2.88	4.31	6.11	6.45	8.6	12.09	2.76	2.24	4.73	3.76	8.46	6.33	6.96	4.68	2.86	5.53	7.74	7.26	8.46	3.96
5.19	5.19	5.45	6.84	9.85	7.9	5.82	6.6	4.66	5.13	9.07	4.4	7.74	6.7	5.8	4.67	3.79	8.47	7.59	8.06	6.91	10.64
4.05	4.05	3.87	7.76	4.52	5.44	8.81	4.84	5.98	7.26	7.85	4.51	8.06	3.63	5.6	10.64	2.24	5.53	8.47	7.52	7.59	3.75
6.45	6.45	3.43	3.29	8.51	9.67	5.36	9.67	8.47	5.35	8.47	8.06	7.26	4.43	6.7	3.98	2.33	7.2	13.31	9.67	8.47	3.14
9.67	9.67	5.54	8.15	12.43	7.35	4.21	6.05	4.84	10.36	4.15	3.22	7.26	3.67	10.23	6.77	8.47	13.31	7.88	5.04	8.47	3.85
7.74	7.74	3.75	2.33	4.84	7.91	9.72	8.47	6.52	7.26	4.84	6.45	9.68	9.67	5.53	3.56	4.35	3.96	4.84	6.91	6.45	4.4
6.05	6.05	6.7	5.21	5.73	4.1	8.9	5.28	7.3	7.26	6.28	9.68	11.38	3.38	6.7	7.8	4.49	5.73	12.1	5.8	8.46	6.99
3.64	3.64	12.58	6.16	5.51	3.13	9.47	5.37	7.54	8.47	8.26	7.26	7.14	5.2	7.44	8.47	4.21	4.95	5.64	10.88	9.67	4.09
3.79	3.79	5.53	5.32	5.56	9.98	8.87	7.74	5.95	2.04	5.88	9.68	7.74	5.44	6.29	7.26	8.54	10.89	6.16	4.84	7.08	6.91
6.65	6.65	7.3	5.72	4.03	3.14	4.96	9.68	4.84	6.17	3.22	9.33	9.68	4.15	7.25	7.26	7.15	2.85	5.28	7.87	6.05	7.2
8.41	8.41	14.29	6.29	8.06	6.91	3.18	7.26	4.64	6.05	8.61	6.05	9.68	8.54	4.43	9.35	3.58	4.84	8.46	2.48	31.45	8.29
5.8	5.8	5.76	5.62	4.46	3.96	2.04	7.26	4.49	7.25	9.68	6.6	7.26	4.55	6.16	9.68	3.39	4.44	4.4	5.21	7.26	5.37
4.57	4.57	4.84	7.86	3.37	5.57	3.21	8.47	4.03	8.26	4.19	7.26	5.6	5.44	8.02	7.17	6.05	11.04	4.23	2.9	7.26	9.67
5.8	5.8	4.15	4.03	4.27	4.63	6.3	9.68	6.24	7.25	9.67	8.26	8.47	6.45	7.26	6.83	8.87	4.15	7.25	3.17	6.77	3.63
8.54	8.54	7.25	16.93	6.83	6.34	4.84	6.45	6.22	6.31	10.89	8.46	12.1	8.29	7.26	5.02	6.91	6.13	5.28	5.09	5.53	6.17
6.77	6.77	7.08	3.05	6.69	4.51	6.16	5.8	7.25	7.74	6.62	8.47	8.47	6.91	5.12	3.87	4	5.37	4.58	5.05	7.26	3.41
8.06	8.06	7.96	5.99	4.51	4.55	6.05	6.45	8.46	6.65	4.3	7.25	7.26	7.05	4.84	6.11	4.53	9.46	2.47	6.55	8.06	5.9
7.26	7.26	3.7	5.37	4.84	4.4	4.38	6.22	3.1	9.68	3.98	8.47	7.26	5.44	4.4	5.44	3.22	12.25	6.24	2.12	8.47	10.88
4.72	4.72	8.38	9.67	4.23	5.9	9.79	3.63	6.05	7.25	9.67	5.8	6.65	4.84	5.45	5.53	6.22	7.26	7.48	2.44	8.6	5.48
6.05	6.05	4.84	9.07	3.3	8.6	5.73	7.25	9.27	6.05	10.89	5.85	4.84	6.51	8.06	4.27	8.06	6.77	13.26	5.77	6.16	6.45
8.47	8.47	6.91	5.37	5.48	4.03	4.05	4.5	4.44	10.89	7.38	12.1	5.37	6.26	10.36	6.38	3.72	5.76	2.7	4.32	10.64	14.51
11.82	11.82	3.66	5.44	7.49	5.21	3.5	5.12	8.39	9.67	7.26	8.26	4.49	6.45	2.98	7.17	3.27	5.8	7.72	3.73	7.26	7.13
5.64	5.64	4.84	6.56	9.68	4.26	2.38	5.17	5.07	7.26	9	8.47	3.87	3.1	5.74	7.25	12.1	9.68	4.94	2.43	8.26	5.07
4.3	4.3	3.11	5.91	5.9	5.8	2.52	4.64	3.87	6.45	3.02	94.35	6.05	3.01	11.05	11.44	3.39	6.05	4.75	4.84	8.47	10.89
3.35	3.35	11.31	7.36	7.47	10.42	5.48	8.47	5.16	4.64	8.87	7.91	3.87	2.59	5.06	7.87	9.67	4.4	7.89	2.76	9.67	9.68
3.32	3.32	5.12	3.63	4.53	4.92	3.5	6.8	5.66	9.19	4.84	4.4	4.69	2.81	7.55	6.05	3.63	7.26	9.67	2.13	6.38	7.44
4.67	4.67	3.79	5.67	4.84	7.25	3.53	8.46	8.47	5.05	6.12	3.87	9.67	2.27	10.89	7.25	12.9	7.52	5.34	6.26	6.05	8.71
4.84	4.84	5.61	7.64	4.53	8.17	2.69	5.37	5.8	3.87	5.37	5.97	12.44	3.08	6.77	19.35	5.66	5.03	3.87	5.64	7.26	4.67
7.66	7.66	7.86	6.4	3.87	7.74	3.71	3.32	5.37	4.78	6.27	7.74	7.4	2.55	4.46	10.89	7.91	2.8	8.47	3.36	7.25	10.99
4.63	4.63	7.08	12.7	3.96	12.09	3.44	6.05	5.09	3.33	6.7	6.69	9.67	1.8	7.52	5.8	6.5	6.7	4.26	4.97	8.46	6.45
6.69	6.69	6.59	3.56	4.06	4.84	4.1	8.47	9.06	7.22	7.26	6.75	3.22	3.34	8.96	4.43	9.67	4.61	8.16	3.34	8.87	4.79
6.05	6.05	5.23	5.89	4.36	8.6	2.4	9.68	4.84	6.29	13.3	8.2	6.29	4.92	5.28	6.16	5.19	7.15	8.49	2.69	4.26	4.1
3.47	3.47	8.98	10.89	4.27	6.45	3.31	7.06	9.67	7.74	9.26	7.44	3.77	3.21	4.84	7.6	6.45	4.63	5.53	9.14	10.99	3.63
7.91	7.91	7.66	6.91	5.28	8.46	2.91	3.93	4.19	5.26	7.74	4.61	6.75	3.06	6.31	7.4	8.47	5.64	3.58	6.05	9.68	8.06
14.97	14.97	4.18	5.85	2.93	13.31	2.89	7.88	4.17	8.98	9.68	4.35	7.52	2.57	6.45	10.88	5.78	6.22	3.24	5.42	10.89	6.45
8.46	8.46	4.84	7.86	4.43	4.06	5.32	2.8	5.8	15.55	9.67	5.94	6.22	2.18	5.64	6.77	7.44	5.39	4.15	2.83	4.09	7.74
9.02	9.02	2.84	6.51	14.51	7.26	8.76	8.2	9.1	4.37	8.47	3.87	4.49	2.62	7.26	4.84	4.3	7.25	3.34	4.21	8.6	3.87
8.15	8.15	6.09	3.87	4.3	4.84	5.56	9.21	10.01	8.06	9.68	4.39	4.66	6.66	12.44	8.6	4.12	6.85	7.25	6.82	6.78	4
6.77	6.77	2.53	2.53	5.28	6.31	14.83	2.7	7.25	7.25	9.67	8.47	10.89	3.26	7.26	12.1	7.87	10.36	4.69	10.23	4.49	12.1
3.29	3.29	3.63	5.8	6.77	4.51	6.14	5.02	6.19	5.23	6.91	8.26	8.06	2.46	4.55	6.45	12.1	9.68	7.97	6.45	8.14	9.67
4.71	4.71	6.77	4.46	5.8	4.84	8.47	5.18	5.37	4.43	7.25	9.68	6.05	2.69	10.89	3.94	5.72	5.32	5.18	6.65	5.91	4.19
4.09	4.09	5.37	6.45	5.18	4.3	3.32	5.95	4.84	4.84	2.74	7.56	5.64	2.77	3.22	3.02	5.44	9.3	3.39	3.67	9.67	3.52
2.96	2.96	4.71	7.66	9.19	8.88	5.56	6.8	8.87	3.39	6.28	9.83	5.8	1.95	6.32	5.37	8.03	4.79	5.44	4.19	5.77	3.13
4.16	4.16	6.47	3.08	4.35	6.24	4.07	5.9	3.57	6.77	5.69	5.44	6.11	1.86	5.23	5.47	11.74	4.84	7.21	3.71	4.84	10.36
3.77	3.77	6.96	7.32	5.98	9.67	6.11	9.25	3.74	3.47	8.36	6.79	6.91	3.27	4.58	7.26	9.16	10.24	12.45	2.91	8.06	8.29
4.9	4.9	8.46	3.14	6.45	5.24	6.91	4.68	3.44	7.95	5.12	12.09	6.56	3.49	7.38	9.44	7.02	7.3	5.53	3.95	8.54	3.22
3.15	3.15	6.45	4.75	5.21	7.71	5.7	8.67	3.67	4.69	4.37	8.38	8.71	1.82	5.91	5.8	11.67	7.6	4.21	3.57	8.47	12.58
5.34	5.34	6.35	9.3	5.21	6.56	5.15	4.84	2.48	5.09	5.02	3.59	12.1	1.92	9.14	70.16	6.45	6.83	9.14	2.22	7.74	7.74
3.31	3.31	4.55	4.99	3.22	9.48	4.97	10.65	4.46	3.27	7.26	5.74	7.26	1.95	6.02	9.67	10.12	6.45	6.22	1.88	9.68	8.06
4.84	4.84	6.69	6.05	6.45	6.65	4.36	4.49	2.46	3.02	5.64	6.28	8.47	2.83	4.34	4.77	6.27	2.83	11.61	2.15	9.68	3.35
3.98	3.98	9.68	5.84	3.63	6.45	5.11	8.26	5.09	5.8	8.47	9.67	8.47	2.43	5.03	6.91	6.65	3.96	10.89	3.42	10.88	5.03
3.78	3.78	12.1	3.63	4.4	8.96	9.67	8.47	6.16	6.87	6.45	10.59	9.68	1.85	7.74	7.74	3.79	6.77	5.98	3.13	12.09	4.84
3.35	3.35	6.74	4.66	5.58	5.58	5.09	3.32	7.15	7.03	5.37	3.22	4.84	4.35	4.58	6.05	5.86	4.3	6.91	6.09	7.44	2.59
2.65	2.65	4.09	2.81	22.97	9.79	4.1	6.51	4.36	7.61	3.62	5.5	6.45	10.89	8.47	8.47	6.76	5	5.21	8.06	3.22	3.56
2.44	2.44	6.39	6.22	8.06	10.75	7.03	4.84	5.95	3.72	6.07	5.72	3.4	5.76	9.68	6.45	4.13	3.49	9.42	4.35	2.69	4.51
3.63	3.63	7.95	5.44	10.18	5.88	4.38	7.44	4.19	4.76	4.71	3.56	10.89	5.95	7.74	4.84	7.44	5.9	4.42	5.15	8.06	3.22
6.13	6.13	4.4	7.69	3.14	2.8	4.03	5.15	7.44	8.54	5.37	9.57	8.71	3.87	5.8	7.4	7.11	3.11	3.22	3.68	8.47	6.16
6.65	6.65	8.46	7.52	7.15	10.62	6.45	6.45	7.5	3.52	5.69	6.73	9.68	8.47	4.55	5.47	8.18	3.82	2.72	2.09	5.64	3.52
4.49	4.49	4.84	3.41	5.26	13.31	4.06	4.84	10.03	4.12	3.87	6.11	7.74	8.65	3.87	8.33	6.56	4.98	3.22	5.53	9.67	5.46
3.87	3.87	4.4	5.69	4.43	6.64	10.89	6.98	5.07	5.21	7.56	3.14	7.26	2.85	7.26	3.63	8.46	4.55	3.03	4.21	8.54	8.55
9.74	9.74	8.47	15.72	8.47	8.46	3.29	8.03	9.68	6.38	7.74	7.43	9.68	5.37	7.25	10.77	4.96	5.44	3.67	4.02	8.47	9.08
8.46	8.46	5.73	5.44	5.05	5.35	5.24	4.75	6.6	6.54	4.24	8.06	4.19	8.06	5.48	7.6	2.69	12.09	10.56	3.45	3.13	5.96
6.33	6.33	15.72	3.79	8.06	3.22	7.98	3.1	8.86	4.34	7.26	7.52	9.67	5.89	9.68	8.47	3.68	7.87	9.68	8.87	5.21	6.18
3.94	3.94	7.79	6.45	9.67	6.65	5.8	4.84	10.89	7.42	7.26	5.24	9	9.68	6.19	6.05	5.26	7.07	2.73	3.14	8.47	9.34
4.21	4.21	4.58	5.32	2.95	7.74	5.06	7.25	6.26	4.3	4.65	4.03	6.62	9.67	6.22	5.44	11.08	10.69	10.88	6.82	13.31	8.47
9.5	9.5	4.4	7.26	4.84	8.87	7.86	8.47	4.64	6.65	6.72	5.37	7.26	7.26	6.38	5.48	7.59	8.47	4.94	3.44	5.37	10.96
8.41	8.41	5.62	3.59	6.7	4.35	6.05	3.47	3.98	6.22	6.91	3.43	9.68	3.41	5.72	4.3	10.21	8.49	9.07	3.3	8.59	7.44
6.31	6.31	9.67	4.3	5.07	2.74	7.26	3.76	6.62	6.22	8.46	4.21	9	5.03	3.48	10.89	5.6	1.9	7.55	3.79	9.26	7.64
7.98	7.98	5.28	5.96	7.09	7.97	4.84	6.22	6.05	5.37	5.03	9.67	8.06	6.45	5.18	11.61	8.98	3.84	7.69	2.6	12.1	8.06
6.36	6.36	6.32	4.33	3.94	7.52	7.26	5.18	6.16	3.77	4.84	5.91	8.46	7.69	5.39	5.11	7.25	4.09	6.09	4.79	6.45	3.72
6.45	6.45	5.12	8.07	6.91	4.84	9.68	4.84	10.55	9.16	5.8	8.34	5.64	6.45	5.41	8.12	3.87	2.32	4.84	1.97	7.52	3.34
12.1	12.1	5.72	6.05	10.24	8.64	6.05	6.8	7.26	5.28	8.79	3.22	7.25	7.18	5	4.66	4.84	2.36	4.27	2.42	8.47	4.97
5.65	5.65	3.57	9.67	5.67	11.52	7.26	4.09	8.47	7.57	8.47	3.67	9.67	8.38	5.04	6.64	4.84	4.46	6.32	4.29	10.89	6.29
6.36	6.36	5.74	3.71	10.18	4.46	5.89	4.23	4.84	9.67	5.64	4.4	5.8	5.53	2.44	4.1	5.09	5.97	4.06	6.12	1.74	6.91
11.69	11.69	4.84	5.9	4.84	7.25	7.25	7.99	7.74	2.79	7.25	7.25	7.26	10.48	3.71	7.25	3.31	5.97	5	6.35	3.96	9.67
7.25	7.25	6.05	7.24	10.31	8.38	7.5	5.85	8.47	5.37	7.03	6.05	8.47	6.83	4.7	7.39	6.83	10.89	6.36	2.9	6.91	4.17
3.8	3.8	15.72	4.63	2.73	6.23	5.72	4.19	8.98	3.05	5.95	4.66	8.47	5.6	3.65	8.6	8.93	5.99	3.87	5.18	6.6	5.44
8.26	8.26	3.49	7.26	5.44	9.68	12.09	4.53	3.55	11.61	7.26	5.18	7.26	3.11	3.72	9.67	6.45	3.81	4.8	10.75	6.26	4.49
7.48	7.48	9.07	3.63	6.16	3.87	9.67	3.55	8.47	4.46	6.4	6.22	4.46	5.69	3.02	3.98	4.84	11.05	6.91	2.88	10.89	6.6
5.54	5.54	5.21	3.52	8.34	3.95	7.38	3.4	7.26	5.34	7.39	9.67	6.3	5.16	1.77	5.28	4.51	9.32	3.48	3.42	8.79	7.47
4.64	4.64	5.12	8.36	6.91	7.26	8.86	2.55	6.77	7.3	4.23	11.58	2.76	5.81	1.97	6.16	4.03	3.7	6.75	7.52	8.46	5.87
5.58	5.58	7.38	4.22	5.02	2.9	4.55	3.47	3.61	11.8	7.25	3.02	7.52	8.26	2.83	3.72	7.23	4.21	8.68	4.09	5.07	3.32
7.26	7.26	9.4	4.3	8.71	6.05	6.61	3.11	6.05	10.61	7.91	9.68	4.84	8.46	2.94	5.8	5.18	5.69	8.28	2.62	9.67	4.01
8.47	8.47	7.25	4.84	7.44	3.65	4.48	4.47	7.86	7.03	6.99	9.67	4.21	6.19	2.49	7.27	3.94	6.45	10.05	3.48	10.89	2.86
6.05	6.05	7.31	6.52	5.32	4.51	7.86	5.04	7.25	4.46	2.15	6.16	11.61	6.32	3.19	4.1	3.58	4.19	4.84	7	9.68	3.01
9.68	9.68	5.99	4.35	4.84	5	4.33	3.45	7.25	4.65	7.44	6.45	7.26	10.1	4.63	10.26	7.74	3.87	3.74	5.6	6.05	2.95
5.72	5.72	7.26	6.26	6.53	5.53	8.47	2.7	4.69	3.19	9.23	3.18	5.16	4.43	3.73	5.65	8.35	3.58	4.66	3.1	5.64	3.84
8.65	8.65	6.12	4.84	5.18	3.52	5.31	5.88	6.34	9.52	8.73	8.29	9.19	7.55	2.44	6.05	9.19	6.13	4.75	2.32	5.64	2.48
4.43	4.43	7.25	4.43	7.66	8.4	7.6	4.11	10.89	5.67	6.45	7.37	6.45	5.08	6.71	5.28	5.03	16.93	5.14	4.46	7.26	4.13
6.45	6.45	6.45	2.57	4.33	9.53	4.59	3.85	7.52	8.29	4.99	5.37	7.26	7.33	9.45	5.89	6.22	6.18	7.25	4.56	7.26	2.98
5.02	5.02	13.31	4.58	8.33	10.12	4.33	4.82	9.67	4.84	5.8	4.84	7.25	5.37	4.67	4.84	7.52	3.38	5.72	7.84	8.47	10.23
8.71	8.71	7.03	3.63	5.53	4.61	5.53	3.14	4.53	4.23	15.72	5.6	7.26	7.26	6.45	5.24	10.88	6.87	6.05	4.84	5.77	3.76
5.8	5.8	4.05	3.1	5.37	8.47	4.56	8.47	5.28	6.45	4.18	5.43	7.74	10.64	5.76	6.05	13.31	9.89	5.76	2.79	5.8	8.38
5.09	5.09	4.37	2.45	7.69	10.88	8.93	4.3	4.46	8.71	8.47	4.35	4.64	10.93	3.1	6.91	6.91	4.84	6.45	3.36	7.87	10.36
7.94	7.94	8.46	5.37	6.77	3.96	6.65	4.37	6.45	10.88	8.6	3.68	7.26	3.82	3.07	7.74	3.8	7.13	11.29	4.18	18.38	4.61
3.39	3.39	9.68	6.74	3	5.07	6.77	5.76	8.45	8.06	6.45	5.16	4.84	6.16	3.25	13.31	5.95	4.46	4.47	4.1	7.25	7.15
5.8	5.8	4.16	3.8	3.22	4.92	3.55	7.15	10.92	6.05	7.26	7.82	7.25	6.45	2.2	9.68	4.84	7.35	5.64	3.72	4.63	12.9
4.93	4.93	4.73	6.66	5.64	8.51	5.44	10.88	3.63	9.67	6.91	5.8	6.05	12.62	3.04	7.26	7.26	7.86	4.15	3.31	3.94	7.59
6.54	6.54	6.05	2.66	5.71	4.02	5.05	5.28	7.26	7.26	8.47	10.89	4.84	6.26	1.58	4.64	3.72	5.24	11.82	3.38	7.89	7.26
7.87	7.87	5.09	6.24	10.42	7.95	3.96	6.36	8.47	7.37	7.26	4.46	9.68	7.11	3.07	5.47	3.68	8.65	10.89	4.07	6.45	9.67
8.79	8.79	4.09	2.51	4.03	3.43	7.33	3.01	7.26	4.3	6.77	5.16	5.64	7.26	3.22	11.11	7.26	5.78	8.47	9.68	6.63	4.23
3.22	3.22	6.17	8.23	5.95	3.87	7.25	8.47	6.05	9.67	6.45	6.16	6.77	4	2.84	4.51	5.12	2.18	3.68	6.55	3.63	4.84
4.72	4.72	8.46	10.48	7.74	4.84	4.84	3.66	6.77	7.74	7.26	4.51	7.26	9.67	3.77	4.07	6.7	3.95	3.94	3.72	8.46	6.22
2.34	2.34	8.18	7.25	10.64	8.06	4.84	4.24	8.06	12.1	6.16	5.16	7.74	8.47	3.66	7.56	5.95	5.05	8.6	5.64	3.77	3.02
3.5	3.5	9.21	8.46	3.98	5.53	6.88	19.35	7.6	7.19	4.84	6.77	7.26	6.45	3.02	9.13	9.16	7	9.85	5.09	9.67	4.69
4.67	4.67	8.47	12.58	3.22	4.61	8.29	6.72	4.84	7.26	5.91	5.28	8.71	5.31	3.04	6.77	5.64	8.87	6.29	3.63	11.82	4.19
3.63	3.63	3.87	3.09	3.45	8.06	10.93	4.85	8.23	6.05	6.45	3.22	8.46	6.77	1.98	4.23	3.87	7.44	8.13	4.45	5.12	6.05
6.44	6.44	6.45	7.26	7.47	7.26	4.03	10.89	10.89	8.47	7.26	7.25	10.89	3.59	2.96	10.21	5.83	5.8	4.37	2.62	10.42	2.85
4.4	4.4	6.75	8.47	4.4	5.8	6.5	8.46	3.76	6.05	8.47	4.58	2.79	9.67	2.74	7.17	4.84	4.61	4.94	2.73	3.96	3.87
6.61	6.61	7.74	6.05	5.49	13.19	5.69	5.8	8.18	4.68	6.77	4.43	4.84	5.13	3.13	6.83	7.2	4.21	4.15	2.07	3.72	4.35
4.53	4.53	8.6	4.35	3.12	5.21	4.09	5.33	6.79	6.08	8.98	6.85	8.47	8.47	3	5.64	3.68	3.58	6.7	3.15	4.34	9.03
3.17	3.17	15.72	6.91	5.99	7.74	4.15	4.61	12.1	9.21	4.15	7.08	6.91	8.29	3.47	5.28	7.5	3.98	6.13	3.53	7.59	11.16
2.37	2.37	5.32	10.21	6.45	5.67	6.32	4.15	5.09	4.98	3.59	7.25	8.47	8.47	2.27	6.77	4.84	6.7	5.95	3.15	2.92	7.09
3.56	3.56	9.67	5.04	7.27	6.58	5.94	3.56	7.25	8.62	7.8	5.53	7.26	7.26	4.77	8.71	4.94	3.87	7.26	3.65	4.71	9.67
3.55	3.55	25.23	10.81	11.84	5.8	3.39	4.19	7.26	4.84	6.05	12.1	8.47	9.67	5.42	7.26	6.45	5.07	6.14	12.09	8.06	4.23
4.84	4.84	7.25	8.29	6.49	4.84	12.28	3.67	4.46	3.22	8.47	4.07	8.71	5.64	5.78	5.21	8.58	2.92	4.47	8.47	2.57	6.45
2.9	2.9	5.42	4.8	6.23	6.51	5.54	9.67	5.21	5.64	5.04	4.3	7.26	5.64	3.77	3.94	3.7	11.31	6.85	5.3	2.68	6.05
8.83	8.83	4.53	4.46	13.3	4.84	4.62	2.62	7.26	4.68	8.47	6.13	7.52	9.68	5.6	7.24	16.93	6.11	9.68	5.53	3.93	5.97
7.26	7.26	5.8	9.67	7.19	5.07	4.62	5.91	5.28	2.81	7.72	5	7.26	7.25	3.07	7.31	5.16	6.34	8.88	8.47	2.74	5.44
8.71	8.71	7.26	5.58	4.27	3.39	12.83	7.44	7.26	7.17	16.12	3.22	6.99	5.53	7.19	4.58	5.69	4.09	5.15	3.58	5.58	6.19
3.37	3.37	4.35	8.33	7.55	5.53	5.62	6.45	8.47	4.84	3.68	7.25	6.05	7.36	4.24	9.67	9.44	4.03	4.24	8.6	7.64	5.04
12.51	12.51	4.77	5.27	10.89	4.06	6.75	7.03	8.06	4.58	9.78	7.32	8.46	5.95	5.76	5.24	13.45	7.15	6.36	4.51	9.68	4.84
7.25	7.25	10.75	3.63	4.51	6.99	8.47	5.8	5.99	8.68	8.22	7.52	7.52	9.46	4.49	6.22	12.38	5.58	5	7.76	4.97	8.18
8.35	8.35	9.67	5.47	6.77	8.47	3.82	6.26	6.22	3.47	7.91	7.08	8.46	4.43	7.77	7.25	6.72	6.4	6.39	7.74	6.64	18.72
8.71	8.71	6.97	6.2	4.48	6.77	4.27	5.16	8.47	12.85	4.64	8.87	7.26	4.3	5.38	6.86	4.84	5.62	6.58	6.11	4.84	7.86
8.46	8.46	7.83	9	5.53	5.37	9.33	5.12	2.53	3.48	3.94	6.62	7.05	4.84	5.24	7.67	5.12	9.85	4.79	10.89	7.9	8.06
9.68	9.68	3.35	5.12	4.46	7.74	5.53	5.82	12.1	6.22	6.05	4.27	6.77	7.74	3.87	11.67	3.77	6.35	4.58	8.46	5.16	6.22
11.23	11.23	2.85	6.05	10.32	7.26	3.48	8.46	4.03	3.87	8.47	6.99	9.68	3.11	3.46	6.05	4.76	10.64	3.93	6.12	3.52	6.11
4.51	4.51	6.05	6.45	7.64	7.26	3.87	9.67	9.67	9.26	9.68	7.81	9.68	9.25	2.77	10.39	5.47	7.26	5.49	6.03	5.91	2.5
4.17	4.17	8.47	3.63	7.77	10.89	4.64	8.46	9.67	4.84	12.1	5.75	7.26	3.72	5.42	4.06	12.1	7.26	7.92	4.4	4.84	5.24
5.15	5.15	6.16	6.22	6.91	6.16	8.6	2.76	7.25	4.84	3.79	2.88	7.25	2.92	4.21	5.6	8.29	6.65	4.37	5.12	6.46	8.37
9.68	9.68	5.95	10.63	6.45	5.64	2.79	7.87	8.47	4.66	7.25	8.47	6.22	7.44	3.31	4.84	4.84	8.18	3.87	6.91	4.4	6.73
6.16	6.16	5.26	6.31	7.26	5.64	6.45	7.25	8.47	5.05	6.77	4.53	7.26	3.87	2.64	4.84	7.6	13.31	9.68	6.67	7.79	7.14
8.43	8.43	5.21	3.51	6.05	12.1	4.12	3.45	6.05	6.62	7.74	5.9	7.25	7.94	4.54	6.05	7.26	3.16	3.02	5.91	6.51	9.82
14.51	14.51	6.11	7.23	11.25	5.56	4.84	6.26	6.16	4.84	6.05	3.05	5.64	8.79	4.23	4.69	5.56	4.55	6.11	7.92	14.51	5.07
6.22	6.22	7.23	5.07	5.28	5.92	3.8	7.52	7.26	9.68	9.68	5.28	7.26	5.99	3.04	7.01	4.15	5.31	3.02	2.14	8.71	10.24
4.61	4.61	2.99	4.15	5.37	4.42	5.02	8.06	7.25	2.76	10.89	8.47	10.89	6.65	4.93	9.68	3.22	6.05	4.95	4.73	16.93	3.22
3.12	3.12	5.56	3.31	6.05	4.84	7.01	9.07	8.47	4.78	5.32	2.96	14.51	4.07	4.93	6.45	8.06	5.56	4.26	3.7	5.99	6.5
6.11	6.11	4.26	8.46	7.25	4.58	4.03	7.26	5.8	3.22	8.47	5.21	7.26	4.1	5.11	10.12	3.07	5.44	7.08	3.04	5.42	9.03
4.84	4.84	7.03	10.68	5.91	7.44	5.28	5.89	5.16	7.83	9.67	6.92	6.77	3.11	5.84	3.1	5.61	5.21	5.37	5.66	9.68	7.09
6.05	6.05	3.69	3.87	8.06	7.26	4.84	10.88	9.21	4.84	3.63	7.15	8.47	7.25	5.72	2.98	10.89	8.46	3.03	12.71	7.25	8.06
9.14	9.14	4.58	7.34	4.84	6.77	4.4	5.64	8.47	4.03	4.4	9.67	6.7	7.06	7.42	3	5.74	5.44	5.58	3.72	4.15	6.99
4.46	4.46	6.22	7.29	3.92	7.36	9.68	6.22	13.31	6.99	8.47	4.4	6.38	6.77	6.62	6.16	6.22	4.17	8.47	4.73	9.67	8.46
8.47	8.47	7.68	4.84	8.22	5.24	4.84	7.54	61.69	2.73	8.47	5.64	8.47	4.84	5.09	9.68	12.31	5.6	5.28	3.58	19.35	4.84
7.88	7.88	8.29	4.72	5.86	7.52	6.22	5.37	9.67	10.31	9.68	4.49	3.52	5.99	10.75	6.05	7.44	3.94	5.69	6.91	7.52	5.07
3.83	3.83	8.79	9.67	4.1	9.68	6.45	7.91	7.38	6.45	7.26	7.78		5.96	2.45	4.51	5.21	6.22	5.94	8.31	5.16	8.46
7.26	7.26	12.09	8.31	5.53	6.05	6.8	4.38	7.26	4.51	4.4	6.91		7.08	3.12	6.77	4.98	4.67	8.47	3.58	10.88	5.12
5.35	5.35	5.07	3.18	4.84	7.26	8.47	9.68	8.47	9.68	6.39	3.22		5.66	2.3	9.13	7.9	7.4	2.99	7.71	7.74	2.85
3.73	3.73	3.81	13.97	6.45	6.22	4.84	10	8.93	7.25	7.52	8.93		4.03	2.71	9	2.83	6.45	8.37	8.79	5.72	9.67
11.61	11.61	7.44	3.1	5.78	6.91	4.36	4.49	4.84	3.93	6.31	4.84		7.97	8.87	6.67	3.52	9.68	16.12	4.27	6.11	9.67
4.13	4.13	10.64	9.21	6.55	4	7.26	8.54	6.42	3.68	3.22	4.29		3.91	6.91	7.52	8.47	8.71	7.03	5.43	3.22	4.84
3.79	3.79	10.48	10.88	6.05	5.41	5.64	4.84	7.26	4.43	9.68	8.47		10.42	7.25	10.89	6.05	6.2	3.05	8.29	9.19	5.37
6.45	6.45	3.87	2.94	4.03	6.77	6.91	9.28	6.77	9.18	9.19	10.89		7.36	6.8	6.02	5.64	5.8	4.57	7.36	8.47	8.79
4.55	4.55	5.72	2.92	7.99	8.71	10.75	4.84	5.3	6.65	5.19	7.15		6.91	6.77	6.45	7.26	6.05	10.89	4.15	13.82	3.18
4.35	4.35	7.74	4.98	3.12	5.64	4.84	8.2	10.4	6.26	7.26	5.64		5.97	4.61	9.67	5.64	9.87	11.06	8.47	7.6	8.87
4.07	4.07	4.07	4.84	7.25	3.98	6.73	8.71	3.96	6.67	10.23	15.72		3.63	6.91	5.8	4.84	10.88	4.84	3.94	4.3	6.45
6.67	6.67	2.75	7.07	7.91	3.49	7.25	6.6	10.43	3.33	4.23	3.92		7.49	6.83	4.26	5.91	7.44	21.76	8.47	3.36	3.48
8.17	8.17	7.91	4.21	5.49	7.91	6.05	6.65	7.68	4.73	6.88	7.13		6.6	6.51	9.68	7.28	6.7	3.13	8.6	6.16	4.84
8.72	8.72	4.58	4.51	5.79	13.31	3.45	9.67	5.91	8.68	5.47	9.68		6.77	4.33	6.16	6.22	7.26	5.91	10.88	2.73	6.7
4.2	4.2	3.08	6.34	5.91	12.58	8.71	6.77	5.91	5.3	4.1	8.47		5.91	6.65	4.84	7.26	10.64	8.26	6.05	8.71	6.19
6.64	6.64	8.26	6.84	3.54	6.14	7.25	6.64	7.25	4.03	5.72	9.67		9.46	3.53	5.61	7.74	5.64	11.07	6.45	4.84	6.83
8.71	8.71	5.64	4.19	8.06	4.67	8.87	3.76	8.47	7.74	5.8	7.25		5	6.12	3.63	6.11	5.47	8.06	5.9	6.45	8.71
4.45	4.45	6	5.62	8.22	7.09	2.93	6.05	9.68	4.03	8.47	5.07		6.22	10.39	6.26	7.55	3.79	7.26	9.68	6.91	7.52
2.42	2.42	3.76	4.56	6.09	4.51	3.63	8.71	8.37	6.91	6.6	5.53		7.05	4.51	5.21	4.84	9.67	11.29	2.42	4.27	3.87
2.89	2.89	4.73	3.82	4.63	5.02	3.35	4.43	5.64	12.58	4.51	7.74		3.05	4.15	8.47	2.37	3.3	5.64	2.58	3.83	8.47
3.48	3.48	3.22	5.91	8.75	5.32	9.67	11.12	2.9	4.07	7.26	7.26		4.58	3.45	4.25	4.84	5.75	7	7.26	7.86	5.02
1.95	1.95	8.06	7.74	7.36	5.64	10.14	5.62	8.06	4.37	6.05	8.46		5.32	6.91	3.28	6.26	9.68	8.47	2.81	3.79	9.67
15.72	15.72	3.63	12.9	9.69	7.26	10.88	2.9	8.71	7.74	6.85	7.2		8.6	4.06	5.44	4.97	8.55	5.37	10.29	5.64	7.25
6.77	6.77	6.36	9.67	4.42	6.76	3.43	6.22	6.45	6.2	7.01	6.54		13.31	8.37	5.37	3.7	3.87	5.47	7.08	4.33	6.2
3.33	3.33	3.87	8.06	7.37	5.37	2.74	3.7	6.31	8.38	5.94	9.68		8.46	5.64	5.18	4.84	8.35	5.44	8.47	6.81	11.04
4.23	4.23	5.03	6.35	4.1	6.16	4.84	4.99	7.26	3.22	8.47	10.89		5.64	4.95	2.98	2.27	7.74	5.64	5.21	5.32	15.63
3.67	3.67	4.84	4.35	4	5.88	5.8	3	7.52	4.25	4.84	5.6		6.91	5.32	4.07	2.34	8.61	3.76	6.45	4.84	11.84
3.72	3.72	3.79	4.37	14.51	7.36	3.3	6.26	2.26	6.7	6.05	3.56		5.01	4.33	8.78	6.37	3.72	5.8	6.11	10.08	2.28
6.85	6.85	4.44	11.12	6.49	6.65	4.3	7.51	3.45	5.8	7.25	3.96		4.97	3.12	9.67	4.68	4.42	8.47	3.01	6.16	3.8
3.41	3.41	6.27	10.08	4.84	7.52	3.48	6.36	6.05	7.69	9.68	4.4		6.77	4.03	10.08	6.77	6.29	5.95	11.05	15.72	4.51
6.45	6.45	5.65	6.13	6.74	3.22	7.03	8.06	5.51	4.23	7.17	3.8		6.32	6.13	9.27	3.14	9.67	4.51	9.68	4	5.37
3.55	3.55	5.91	7.44	3.63	4.51	7.06	7.91	5.05	6.73	4.63	4.46		4.84	5.83	3.63	7.07	11.05	3.65	6.93	5.44	12.1
2.64	2.64	5.37	6.53	3	11.04	5.99	6.77	7.26	8.47	2.6	4.03		9.68	9.68	6.45	9.32	4.15	5.32	10.64	4.08	6.16
3.29	3.29	9.67	4.99	9.68	7.17	4.19	4.84	16.49	9.68	3.52	8.06		4.84	4.84	7.98	5.12	2.64	6.77	9.68	3.59	6.27
3.57	3.57	8.46	4.96	3.76	4.07	5.28	3.72	5.28	3.87	6.11	4.84		8.47	4.09	6.73	9.67	5.8	6.85	4.63	5.62	5.17
2.65	2.65	5.37	5.89	9.01	5.8	4.97	7.59	6.12	6.45	5.53	8.46		8.47	8.46	5.46	7.26	4.4	9.67	10.88	6.51	5.09
4.01	4.01	3.98	6.22	8.33	4.84	3.52	13.31	8.47	6.05	3.55	7.36		6.56	6.32	6.57	10.36	9.67	4	4.84	9.68	8.79
3.36	3.36	3.69	8.06	5.82	5.24	5.28	9.13	5.24	3.52	5.8	4.21		4.84	10.43	5.02	7.9	7.69	7.37	5.21		4.99
4.84	4.84	3.76	6.91	6.76	6.45	10.48	7.91	12.09	6.31	4.35	2.76		8.22	9.68	9	10.9	8.71	5.53	6.91		4.84
2.98	2.98	6.28	3.45	5.37	5.44	5.21	6.05	6.28	6.54	3.48	10.96		4.13	4.61	3.22	6.22	7.26	5.05	7.26		5.24
6.05	6.05	7.14	3.34	6.54	6.22	4.84	5.07	5.47	5.32	2.98	8.47		3.97	12.09	5.37	6.62	8.29	4.43	5.64		2.9
5.15	5.15	3.22	6.77	5.58	7.03	6.27	19.25	3.52	8.47	11.05	12.31		7.26	11.23	9.67	4.99	7.25	3.58	8.47		7.4
2.34	2.34	8.46	8.22	4.48	4.15	6.33	3.48	6.31	6.31	6.91	6.32		3.36	4.84	4.78	5.37	7.91	7.26	7.25		6.3
2.74	2.74	7.26	8.29	7.26	9.36	9.68	13.74	9.68	8.38	5.32	4.61		8.47	7.03	6.32	8.79	4.4	7.93	7.26		5.44
5.93	5.93	5.58	9.61	6.05	5.69	5.53	6.99	4.58	3.3	6.77	3.47		3.63	10.11	5.07	5.34	6.27	13.31	8.47		3.22
3.79	3.79	3.48	3.56	7.52	7.26	5.42	3.52	2.83	4.61	3.56	7.56		5.68	5.26	3.87	5.02	4.51	3.63	6.45		7.25
3.22	3.22	9.07	3.54	9.68	4.7	5.58	9.67	4.84	8.38	9.68	5.37		6.05	5.22	11.61	3.96	7.26	8.46	7.26		6.82
2.14	2.14	8.15	4.21	8.06	11.16	5.37	4.84	4.23	6.33	6.16	4.84		9.4	5.47	5.8	8.74	4.58	8.6	10.89		8.47
5.24	5.24	9.14	3.38	4.49	3.1	4.51	4.43	5.91	5.58	6.45	5.85		5.34	12.67	8.22	4.57	2.55	6.05	9.58		5.66
9.03	9.03	6.63	5.24	8.47	6.81	5.37	4	14.51	10.75	4.84	10.89		3.43	3.68	5.07	7.74	2.96	7.03	8.47		4.84
9.67	9.67	4.19	5.62	7.08	7.71	10.41	17.82	6.76	4.61	9.68	8.47		9.5	9.67	6.45	7.25	12.09	6.65	6.05		12.09
4.84	4.84	4.15	3.87	5.85	8.46	4.72	6.05	6.82	4.15	6.6	5.28		5.85	11.43	3.22	2.51	7.26	8.47	9.67		9.26
6.56	6.56	5.66	8.6	5.16	5.45	10.88	6.36	8.18	7.64	6.13	7.87		7.25	6.91	5.64	4.67	4.84	8.54	6.05		7.26
8.6	8.6	5.72	7.03	5.91	4.53	7.86	4.26	10.64	5.91	4.84	7.26		4.51	2.93	5.8	8.38	6.95	6.91	8.47		13.28
4.43	4.43	9.68	5.92	4.26	6.77	8.71	7.83	3.22	4.09	7.25	8.47		2.37	12.7	5.07	6.32	3.41	4.27	5.64		5.37
3.07	3.07	6.85	8.46	6.65	5.91	4.84	9.65	5.89	6.8	5.8	5.24		7.99	8.08	7.85	5.34	5.06	7.99	6.05		9.68
2.4	2.4	5.58	5.24	5.8	7.69	5.47	9.67	4.53	5.39	8.47	11.47		3.87	5.9	5.29	4.84	10.51	3.04	8.47		7.26
2.36	2.36	4.84	10.89	8.93	4.09	6.11	7.25	3.76	4.73	9.68	4.59		4.96	4.73	5.49	4.29	9.67	7.09	3.08		5.21
2.14	2.14	5.64	8.47	7.74	5.53	4.84	4.69	5.93	4.4	35.08	6.61		7.47	5.8	9.62	9.61	3.45	4.23	9.67		5.76
3	3	4.19	8.47	3.87	3.82	3.59	7.36	5.74	4.61	4.4	4.55		5.21	6.18	7.74	11.34	4.3	7.25	7.25		7.14
9.85	9.85	7.26	7.26	6.26	10.89	5.92	4.93	5.42	4.23	6.99	7.17		3.14	3.63	3.3	5.37	9.67	7.03	6.05		8.38
6.22	6.22	5.8	7.52	9.68	5.8	12.9	2.8	6.39	9.68	7.26	6.34		7.74	8.65	7.87	6.45	8.33	12.09	7.26		3.52
3.63	3.63	5.37	6.91	8.71	3.76	3.72	4.42	6.02	3.67	7.26	5.48		4.65	4.03	5.9	4.4	5.21	10.89	9.68		6.45
4.44	4.44	5.63	4.98	8.87	7.59	4.18	7.65	5.24	6.77	7.26	4.38		3.79	7.6	3.86	4.4	3.49	5.28	9.68		10.35
4.1	4.1	4.73	6.31	7.34	4.26	9	6.05	8.71	4.15	14.51	8.41		5.06	7.81	7.42	6.45	4.09	7.26	7.26		7.13
1.93	1.93	9.13	6.16	7.4	6.16	2.73	5.16	5.94	5.91	8.47	7.6		5.31	4.27	7.25	3.76	10.88	15.72	4.84		6.36
2.36	2.36	8.87	6.13	4.23	3.66	3.3	7.25	7.26	3.43	8.46	5.67		3.34	5.05	3.49	3.63	8.06	5.11	2.9		8.29
2.63	2.63	6.45	3.58	4.3	5.44	3.53	6.34	7.69	5.07	3.66	3.67		5.77	6.7	4.17	6.45	8.47	7.95	4.66		4.34
2.69	2.69	5.07	4.58	8.71	3.11	5.69	7.5	6.32	8.54	5.21	9.67		7.26	7.91	5.45	6.22	5.05	6.77	3.38		9.94
1.59	1.59	5.73	13.1	7.52	5.6	5.8	6.13	2.76	3.8	8.47	10.89		8.18	4.64	4.26	11.4	4.3	9.68	3.87		9.68
3.06	3.06	5.09	6.16	4.23	5.07	3.63	3.16	4.4	10.96	6.77	4.84		10.89	6.58	4.84	8.47	3.52	9.68	4.84		8.46
2.38	2.38	5.95	10.64	4.49	4.03	5.63	5.37	6.07	5.53	10.89	7.25		7.9	2.69	3.87	5.5	5.3	5.8	6.45		2.74
2.49	2.49	4.51	4.23	7.52	5.21	5.37	8.87	5.85	5.53	7.26	8.46		7.03	10.64	8.79	6.77	8.47	8.87	8.72		6.73
2.7	2.7	13.82	5.8	7.25	4.07	3.22	7.53	8.38	5.8	7.26	7.26		8.46	7.05	4	8.26	9.68	6.85	6.45		6.75
2.42	2.42	3.32	7.03	4.84	2.69	3.32	6.91	8.47	6.08	4.46	3.55		8.47	8.29	3.43	5.44	9.67	3.94	6.77		6.34
3.61	3.61	4.43	4.84	13.97	4.3	3.71	9.03	6.16	3.05	9.68	8.47		9.68	7.27	4	7.15	7.26	8.98	4.4		6.54
4.39	4.39	3.76	10.48	6.88	4.26	6.69	4.5	3.82	3.66	9.67	10.88		5.53	9.03	4.61	4.84	3.58	5.32	14.51		13.3
3.52	3.52	4.46	6.91	4.46	5.37	6.77	5.18	6.45	4.26	6.05	8.06		5.02	10.28	5.54	4.84	7.6	7.25	9.26		4.51
2.61	2.61	4.84	7.25	7.37	5.97	6.77	8.38	6	5.8	6.16	8.47		5.32	5.62	4.96	7.26	16.87	7.17	7.06		5.09
1.86	1.86	4.34	4.37	6.51	5.44	14.51	5.75	3.5	5.64	9.67	5.64		5.62	6.62	8.35	9.68	5.62	5.07	7.25		9.11
1.8	1.8	5.21	3.39	7.25	6.66	7.02	3.14	4.84	4.28	7.26	8.47		3.04	4.84	4.84	8.47	4.3	4.84			6.93
2.15	2.15	5.32	9.68	6.05	5	8.74	7.4	11.29	7.36	7.74	9.68		3.65	4.23	4.07	7.26	12.1	6.99			9.68
2.02	2.02	5.64	10.18	7.91	2.66	6.91	9.02	3.18	3.56	4.58	5.64		3.13	13.31	6.83	6.91	2.34	2.6			4.78
2.14	2.14	4.09	7.87	8.6	5.72	7.5	5.77	5.44	6.91	7.22	9.68		5.87	4.35	8.49	6.05	2.02	8.06			3.1
2.38	2.38	3.34	5.64	3.74	4.09	7.25	7.25	8.72	4.96	7.74	6		8.2	10.16	6.16	8.47	4.46	4.45			6.99
2.47	2.47	5.02	8.47	5.48	7	3.87	4.61	6.91	3.22	5.77	5.26		3.48	6.26	7.74	7.31	5.6	8.35			4.84
2.19	2.19	5.37	12.67	5.37	3.45	2.9	11.95	3.29	8.22	3.8	6		3.87	6.69	5.8	8.47	3.76	5.44			4.84
2.03	2.03	2.69	5.69	8.29	7.25	6.05	7.08	8.87	4.37	5.05	4.84		6.45	5.24	5.16	10.89	9.67	4.07			8.06
2.09	2.09	6.85	2.96	4.01	4.84	7.44	6.45	5.62	5.13	5.64	6.57		3.64	6.91	4.68	7.26	6.77	5.09			3.06
4.99	4.99	6.6	5.58	8.8	6.73	4.48	6.37	5.89	6.16	6.24	6.94		3.7	6.91	8.06	8.46	3.13	5.8			3.47
3.71	3.71	4.07	4.15	2.88	7.25	5.22	2.62	6.22	5.76	7.44	7.3		6.54	3.81	3.34	8.06	4.23	10.64			5.89
2.8	2.8	7.3	7.03	7.14	4.51	13.13	6.01	8.02	7.03	7.26	5.09		4.13	12.09	3.13	7.26	9.21	6.65			39.92
1.67	1.67	6.77	12.1	7.95	6.2	8.06	4.84	6.45	7.26	6.05	3.55		3.93	6.22	7.17	8.47		4.84			9.68
1.84	1.84	3.56	5.64	7.64	3.87	5.18	13.31	4.64	8.98	9.67	5.65		3.66	4.84	4.49	4.96		7.91			9.67
2.51	2.51	5.91	8.71	5.73	4.82	3.63	9.67	7.08	6.45	8.46	9.67		3.96	4.09	8.06	9.67		4.15			7.52
1.73	1.73	5.91	8.47	4.94	8.21	7.64	4.21	4.19	4.3	8.47	8.75		15.72	5.28	9.68	4.84		5.12			7.52
2.91	2.91	15.77	5.5	4.61	6.24	3.87	4	5.91	9.67	9.68	14.88		3.87	6.53	4.4	7.26		5.76			4.4
2.4	2.4	12.09	3.96	9.62	3.14	7.25	6.57	5.64	6.22	8.46	6.07		4.08	3.82	9.14	5.21		4.26			4.43
2.1	2.1	7.4	8.47	7.25	7.82	5.44	4.84	5.3	3.95	8.47			9.46	5.91	3.1	8.79		10.31			8.3
3.01	3.01	4.69	5.95	3.41	5.37	4.46	7.25	5.15	5.3	8.23			9.89	4.51	5.8	8.47		7.26			6.22
4.36	4.36	4.4	7.82	4.84	3.39	6.13	7.25	7.25	5.42	7.52			10.48	4.46	5.8	7.26		8.2			2.42
3.59	3.59	3.79	4.4	7.16	7.26	4.96	3.66	2.88	4.61	7.26			7.26	5.86	7.71	14.51					10.03
9.67	9.67	7.44	8.71	11.04	3.98	11.29	7.25	6.42	5.72	8.46			3.93	5.69	4.55	5.53					4.51
4.7	4.7	8.79	5.78	11.41	5.12	6.67	4.16	4.51	7.71	8.47			3.56	7.86	11.29	4.15					7.74
2.88	2.88	3.7	5.8	5.02	3.79	7.22	4.84	4.59	7.09	5.95			6.47	7.83	6.55	4.46					7.22
6.7	6.7	3.66	12.31	7.52	4.15	6.81	6.83	3.48	3.63	5.8			3.59	7.93	6.29	9.17					7.86
10.31	10.31	3.76	5.12	7.86	9.67	7.26	3.98	8.46	12.31	7.03			6.31	6.7	7.25	5.37					10.89
4.19	4.19	3.79	9.14	6.05	7.03	3.76	5.3	8.47	3.84	8.46			4.67	4.43	3.1	5.95					4.69
4.43	4.43	7.42	7.66	6.36	6.91	5.73	5.02	10.55	7.04	6.91			5.86	7.17	7.03	7.74					4.35
5.6	5.6	7.26	4.84	6.61	4.84	6.16	4.98	8.59	7.74	6.27			7.44	5.26	8.09	2.93					4.63
7.78	7.78	4.09	6.97	4.84	8.6	3.4	5.16	5.7	5.23	8.47			6.59	6.6	10.08	5.32					5.05
8.47	8.47	10.31	4.4	5.22	8.29	4.21	6.45	4.42	4.84	9.87			3.39	8.46	4.23	5.8					7.74
5	5	11.61	6.11	5.42	5.47	9.8	8.47	6.91	3.01	5			2.8	6.05	8.29	6.27					7.25
4.84	4.84	6.65	7.03	5.72	4.18	8.18	5.74	3.12	9.8	6.45			6.22	8.47	7.74	7.14					11.64
5.73	5.73	12.09	8.79	7.64	3.87	6.22	6.05	6.05	6.72	6.16			7.25	7.26	5	8.65					3.98
7.26	7.26	4.84	8.47	4.84	9.67	6.11	6.91	9.07	7.42	7.59			7.77	8.46	6.81	5					8.06
5.07	5.07	5.24	3.85	8.94	5.59	10.36	7.25	5.8	13.54	7.91			6.22	8.79	5.32	5.45					6.12
9.67	9.67	3.98	7.25	8.47	7.14	5.53	10.64	9.67	3.41	7.26			4.84	8.47	4.34	4.54					19.03
7.16	7.16	3.52	6.05	7.91	6.05	3.87	3.32	7.25	6.11	4.84			5.05	11.08	8.47	3.63					11.82
6.16	6.16	7.69	3.41	6.22	4.07	6.27	8.83	11.16	4.7	9.68			5.64	6.53	7.25	5.02					10.89
7.37	7.37	4.56	5.64	6.36	8.96	2.27	4.84	8.47	4.3	6.18			6.09	6.31	4.84	3.98					2.68
7.64	7.64	6.96	7.25	8.18	9.68	9.67	5.16	6.09	6.91	6.31			5.86	6.05	4.42	3.7					3.56
4.99	4.99	7.3	14.51	10.96	4.61	7.03	5.91	6.26	8.06	5.8			3.22	10.89	4.63	9.75					5.07
9.67	9.67	5.17	9.68	4.3	5.03	5.79	3.43	3.87	5.76	8.47			7.26	8.47	2.9	10.89					13.95
9.67	9.67	9.67	10.88	5.25	12.1	13.7	9.67	6.91	8.47	8.87			8.46	7.26	6.45	9.42					7.9
8.34	8.34	7.25	3.63	6.77	8.6	6.51	5.05	9.67	5.64	6.77			10.89	5.21	4.42						4.23
7.74	7.74	5.16	3.56	4.26	9.68	8.23	15.05	4.51	6.51	6.48			7.17	3.45	5.53						13.31
4.84	4.84	4.98	8.47	7.91	9.95	7.38	4.51	10.89	5.7	9.21			4.46	8.47	8.98						5.4
10.64	10.64	4.07	4.92	4.56	6.73	6.45	4.34	3.14	6.45	9.07			6.05	8.47	5.32						8.44
14.51	14.51	3.68	8.2	4.41	7.03	9.67	7.26	5.57	5.91	6.65			8.98	7.26	8.06						3.67
10.36	10.36	11.64	7.25	3.81	13.31	2.92	4.84	6.45	2.93	9.19			7.52	2.85	7.26						4.51
4.58	4.58	5.21	6.96	3.77	5.61	7.74	3.33	7.68	6.31	7.26			4.84	7.26	9.67						6.22
5.18	5.18	5.64	7.17	4.48	4.49	2.76	7.52	6.62	4.55	7.26			5.74	6.05	7.77						5.07
4.4	4.4	11.05	3.02	2.62	6.29	4.43	5.72	8.47	4.84	8.46			6.16	7.03	6.91						8.25
10.89	10.89	5.37	9.33	3.4	5.24	4.3	5.83	8.06	7.52	8.47			9.68	8.6	10.89						8.87
4.84	4.84	4.84	5.48	3.37	5.8	10.21	3.61	8.47	3.35	4.84			10.89	4.15	6.26						7.74
7.74	7.74	3.22	3.77	3.16	7.86	6.45	8.06	8.46	6.91	8.47			7.74	9.68	8.47						5.58
5.31	5.31	10.75	3.87	3	6.77	4.84	11.33	7.26	6.31	6.45			4.07	5.37	7.26						5.64
10.72	10.72	3.76	7.26	4.07	8.6	10.89	6.22	6.77	8.54	4.15			9.2	10.89	5.05						7.56
4.63	4.63	8.58	12.01	3.42	9.68	7.17	7.26	7.26	8.06	5.28			4.31	9.68	2.85						4.03
6.77	6.77	6.05	6.31	4.3	6.65	3.38	5.8	8.71	5.37	9.67			7.25	6.45	8.29						5.64
6.16	6.16	5.07	3.55	6.77	7.39	8.79	8.71	16.93	9.67	5.53			4.66	9.21	5.3						6.45
5.48	5.48	4.34	8.01	10.75	5.64	8.47	8.47	6.91	12.37	7.03			7.26	5.16	8.29						5.28
5.58	5.58	13.54	6.81	10.89	10.89	4.84	6.05	7.26	8.6	8.87			3.22	8.46	7.69						5.74
9.39	9.39	12.37	6.91	8.51	3.52	7.74	5.37	3.42	8.47	12.09			9.67	12.1	7.4						6.22
7.33	7.33	11.87	3.8	5.07	6.45	7.74	7.17	6.65	3.52	3.72			5.16	9.68	12.09						8.29
7.6	7.6	4.54	4	7.74	3.35	7.03	10.89	5.8	12.9	7.4			8.06	3.76	7.5						6.73
8.26	8.26	10.21	11.24	5	8.91	3.67	9.67	4.11	9.68	6.62			5.32	7.26	7.26						4.3
7.25	7.25	7.2	6.45	5.85	10.23	4.84	4.84	9.21	5.64	6.31			7.44	4.46	4.03						8.06
3.8	3.8	6.45	4.18	5.14	6.26	7.6	8.47	4.55	4.23	7.25			9.02	3.96	9.68						3.63
7.24	7.24	6.65	8.6	6.68	6.26	5.47	5.26	5.67	6.91	8.06			3.22	7.74	5.32						4.19
8.18	8.18	4.63	8.46	3.27	12.09	8.29	4.66	12.1	9.67	9.67			6.95	7.71	7.26						4.3
7.18	7.18	5.8	3.87	5.05	10.33	4.19	9.46	7.9	8.47	5.07			5.24	7.52	8.18						5.03
4.61	4.61	8.04	4.34	7.25	4	5	7.25	6.22	4.43	6.05			5.16	8.47	8.46						4.58
5.34	5.34	4.84	7.03	4.15	10.84	8.6	7.25	5.95	7.26	2.95			6.45	8.47	19.14						7.09
5.07	5.07	4.36	7.02	2.69	4.03	3.59	3.8	21.77	10.89	6.13			3.15	3.35	4.3						5.8
6.55	6.55	3.74	10.08	7.86	2.7	5.8	3.52	5.91	9.68	6.91			4.67	3.11	4.26						8.82
3.94	3.94	5.37	12.1	8.98	8.44	9.88	7.4	9.67	10.64	7.26			7.03	5.58	5.8						8.46
8.71	8.71	3.6	6.11	6.58	5.72	3.71	5.07	7.74	13.54	8.47				10.42	4.35						8.47
8.71	8.71	5.66	6.83	7.98	10.09	4.4	7.91	7.26	5.8	9.68				5.41	3.8						4.34
4.84	4.84	5.8	4.42	11.61	4.84	5.07	4.53	8.47	7.87	7.26				6.58	5.09						12.44
6.99	6.99	10.89	6.34	6.45	3.65	4.48	6.85	7.52	5.8	7.26				8.46	7.19						4.43
3.96	3.96	12.36	7.6	10.88	5.02	4.84	10.64	5.28	3.29	5.8				4.95	10.06						10.67
7.05	7.05	10.48	4.12	5.24	7.95	10.64	14.81	7.26	7.03	10.89				4.35	4.15						6.45
3.98	3.98	8.57	5.37	8.47	10.88	5.95	9.68	9.68	5.91	2.33				4.33	3.44						4.88
4.96	4.96	8.98	5.91	8.2	6.77	7.49	4.9	8.47	10.28	8.47				8.23	7.26						5.44
9.07	9.07	8.34	6.29	3.57	5.32	5.37	7.3	8.47	9.23	8.46				4.3							14.81
6.35	6.35	2.87	6.05	4.66	3.56	5.64	10.89	7.26	3.92	6.05				4.75							7.74
3.92	3.92	7.64	9.16	8.06	9.08	9.06	9.68	8.47	3.82	7.26				6.16							9.55
6.65	6.65	12.37	7.42	8.47	6.99	7.74	10.89	7.74	6.48	3.98				3.22							4.23
10.75	10.75	10.69	6.22	4.84	6.26	7.52	3.45	7.69	4.43	8.46				5.37							5.37
7.4	7.4	2.96	3	7.36	4.09	9.68	4.84	5.64	10.36	6.05				6.35							6.11
6.99	6.99	6.99	3.14	7.37	6.56	7.26	8.87	8.47	4.67	9.68				5.3							5.69
8.29	8.29	6.16	3.76	7.2	4.26	6.91	5.73	7.26	4.01	7.25				5.72							3.33
4.3	4.3	3.04	7.26	8.46	7.52	10.72	11.95	5.64	7.44	9.68				6.7							4.58
8.06	8.06	8.29	7.25	5.69	4.3	9.67	6.45	7.87	4.42	6.65				5.69							7.52
7.9	7.9	3.63	7.26	5.8	5.96	7.26	9.68	7.74	5.44	8.47				7.01							3.92
7.25	7.25	5.69	9.68	7.72	7.09	12.09	2.52	8.47	11.29	9.68				2.86							3.45
6.05	6.05	5.32	7.05	5.87	4.84	4.84	6.22	7.26	9	8.46				2.71							7.78
4.84	4.84	3.44	7.05	6.39	7.6	8.47	4.21	6.05	5.72	9.08				2.5							4.51
10.89	10.89	7.05	9.5	6.28	5.07	7.52	6.78	8.6	8.71	3.45				7.08							3.7
5.85	5.85	5.44	4.94	5.12	4.4	5.16	3.15	9.67	5.15	7.26				4.03							6.99
6.45	6.45	5.99	12.09	4.84	8.47	8.46	8.47	3.55	7.52	9.87				10.89							4.84
8.46	8.46	8.06	12.1	4.23	4.33	4.15	8.17	4.51	5.09					7.68							7.91
4.84	4.84	6.45	7.26	5.88	9.67	7.26	5.72	6.6	7.25					7.4							6.65
7.44	7.44	4.84	3.22	4.97	4.19	8.47	4.23	3.59	10.88					7.69							7.74
7.26	7.26	13.54	7.84	4.84	7.13	6.39	3.04	6.7	3.45					3.87							4.35
8.47	8.47	6.99	10.36	3.08	10.89	5.28	10.63	7.74	5.02					4.48							5.23
7.25	7.25	3.43	10.89	7.26	8.47	3.43	6.22	9.68	8.98					7.58							4.21
10.89	10.89	7.26	5.64	5.91	5.28	3.5	6.22	4.84	5.8					3.14							4.37
3.36	3.36	6.45	5.62	8.28	6.11	5.94	3.36	15.34	9.7					5.48							9.67
6.77	6.77	7.08	3.32	4.84	11.61	7.03	4.66	3.63	4.45					6.45							10.75
8.47	8.47	7.6	9.67	8.71	4.88	9.68	8.42	7.35	4.37					6.39							2.76
7.52	7.52	8.06	4.84	7.71	5.09	5.8	5.19	9.68	3.1					7.26							10.32
3.22	3.22	4.63	9.67	5.01	7.15	5.33	5.74	3.7	3.52					6.79							8.29
6.91	6.91	5.09	4.15	8.06	8.47	5.44	2.96	9.68	8.41					4.8							5.02
3.99	3.99	5.89	4.84	5.14	4.84	13.26	2.38	6.05	4.84					9.68							5.28
5.58	5.58	10.64	4.3	5.09	7.03	4.4	2.98	5.8	3.99					5.95							5.85
4.84	4.84	8.6	5.25	5.52	8.79	7.47	4.84	10.75	6.26					5.21							4.84
3.52	3.52	6.05	7.95	4.03	6.63	3.45	5.15	5.64	5.53					8.22							3.49
6.09	6.09	5.37	5.05	4.51	7.74	6.39	11.93	4.07	5.8					8.79							4.4
6.65	6.65	2.8	8.06	5.53	4.46	3.98	5.57	3.43	6.05					5.69							3.1
8.35	8.35	5.44	5.86	10.99	5.98	4.52	3.63	3.88	7.22					3.14							2.63
6.16	6.16	8.64	4.53	9.78	3.13	11.52	4.4	4.4	6.81					6.85							5.21
4.23	4.23	4.84	6.91	4.84	7.26	8.58	4.27	3.45	6.16					5.91							4.4
8.98	8.98	4.84	7.03	4.09	5.9	5.72	7.25	7.26	3.39					7.71							8.01
7.14	7.14	3.22	7.33	3.49	5.8	5.23	7.82	7.26	6.31					4.23							8.47
9.68	9.68	6.52	8.47	8.46	6.46	4.05	3.56	9.68	5.45					9.33							4.3
4.27	4.27	7.25	5.21	6.05	5.72	3.32	6.65	9.67	7.26					4.84							5.69
7.26	7.26	4.84	8.06	4.66	7.59	6.62	6.22	8.47	8.47					3.34							6.62
4.84	4.84	3.2	7.46	4.43	4.4	4.98	6.48	8.47	9.67					9.67							7.25
6.77	6.77	2.85	2.98	4.61	3.35	8.61	6.77	5.8	5.32					7.26							6.65
9.68	9.68	4	3.04	5.8	12.26	5.06	9.85	4.66	5.55					4.19							6.22
6.14	6.14	8.06	12.09	5.69	5.37	3.76	6.05	4.95	7.48					5.21							4.17
8.47	8.47	3.22	4.51	3.76	13.3	7.26	5.24	5.3	3.1					8.18							8.87
7.5	7.5	7.74	5.5	6.91	8.79	7.74	7.4	5.64	8.9					8.06							6.77
5.24	5.24	6.05	4.49	11.47	7.26	13.31	7.96	9.23	7.03					4.84							3.63
6.54	6.54	3.63	9.68	3.36	5.8	9.5	7.44	2.68	8.49					7.25							9.67
6.75	6.75	6.45	5.6	9.67	7.25	8.71	5.55	5.32	8.47					5.17							4.84
3.36	3.36	8.44	10.89	4.78	5.6	8.06	4.81	7.25	7.26					5.8							4.84
5.64	5.64	7.25	8.47	7.91	8.5	4.55	4.7	5	5.05					3.66							9.03
4.19	4.19	7.03	8.46	5.26	6.05	2.72	6.22	12.09	5.8					10.81							6.27
5.44	5.44	6.45	6.05	7.44	9.68	9.21	6.29	5.28	9.68					5.69							6.58
11.75	11.75	6.56	7.3	4.84	5.16	3.48	9.78	5.96	5.78					10.08							8.29
7.87	7.87	9.74	6.25	5.37	5.37	4.84	4.49		5.95					8.08							7.26
8.47	8.47	7.4	4.18	3.93	6.62	5.96	6.79		7.25					7.74							4.34
6.45	6.45	5.53	6.05	8.79	8.31	4.84	2.75		10.75					4.34							5.53
9.68	9.68	13.31	6.05	13.82	3.54	5.21	8.08		4.74					7.25							4.4
10.89	10.89	6.36	6.45	4.84	3.96	8.22	4.96		5.21					8.06							4.09
6.45	6.45	5.95	3.92	8.29	7.74	4.35	7.94		9.44					6.05							3.82
9.68	9.68	8.38	3.43	3.52	5.18	8.47	4.77		3.44					4.51							5.24
4.58	4.58	7.4	8.47	8.98	7.74	8.06	4.44		5.8					2.8							5.34
7.25	7.25	6.83	4.34	2.76	6.11	3.67	9.96		6.77					10.88							5.92
7.2	7.2	5.28	4.64	5.03	7.36	9.67	6.05		5.37					8.88							8.46
9.44	9.44	8.06	3.87	5.21	7.93	5.41	4.53		6.45					11.8							9.67
5.95	5.95	4.09	4.03	5.41	3.87	5.64	4.3		5.6					6.05							6.22
5.8	5.8	8.06	5.18	4.35	11.16	11.82	8.62		7.91					5.8							5.41
8.46	8.46	3.72	4.66	5.67	7.26	6.32	6.58		6.81					5.72							6.05
8.6	8.6	5.37	4.15	7.25	6.99	8.47	6.45		7.25					9.68							6.95
7.26	7.26	4.84	6.52	7.01	11.52	6.05	6.42		7.03					11.49							8.47
7.52	7.52	7.03	4.06	6.45	7.26	8.46	5.69		5.82					4.66							9.67
9.68	9.68	4.61	8.51	12.76	5.77	7.26	6.16		4.3					5.04							8.06
8.71	8.71	4.07	5.57	7.07	4.07	7.25	8.38		5.18					10.43							3.22
7.26	7.26	3.67	6.91	3.36	7.26	6.45	5.97		5.8					6.77							7.66
6.05	6.05	3.96	14.66	3.93	7.26	5.17	5.58							3.1							10.42
8.47	8.47	8.71	8.06	3.12	8.47	9.68	5.09							3.87							4.26
4.19	4.19	4.73	10.75	5.93	5.94	6.91	4.5							7.25							6.96
5.58	5.58	4.23	8.47	3.22	9.68	7.03	5.34							7.17							2.66
9.6	9.6	11.48	4.61	8.38	8.47	10.54	3.98							9.38							9.67
5.34	5.34	6.63	9.28	3.63	4.23	6.45	4.84							6.72							4
7.8	7.8	5.64	8.47	8.65	7.26	7.25	6.29							4.58							6.63
7.34	7.34	3.43	10.75	8.47	7.25	5.37	5.18							3.52							6.6
8.47	8.47	7.44	4.94	8.46	6.45	7.25	11.18							5.32							6.05
7.36	7.36	4.84	4.15	5.8	6.7	8.6	6.08							10.88							4.15
5.95	5.95	5.28	14.62	7.74	9.04	8.06	8.87							6.38							6.14
5.3	5.3	3.07	9.67	6.72	8.46	7.76	4.84							3.72							6.94
12.1	12.1	2.81	5.58	6.77	8.47	3.72	7.6							4.23							5.99
4.26	4.26	5.47	5.37	8.47	3.12	8.6	3.8														6.58
3.56	3.56	3.52	4.3	5.02	5.44	8.71	3.1														5.8
6.51	6.51	5.63	2.05	5.37	6.34	6.05	3.87														3.39
6.45	6.45	5.8	3.16	6.16	9	3.06	5.28														8.35
14.51	14.51	4.1	2.5	6.91	8.71	7.25	6.27														8.47
6.58	6.58	8.5	3.51	9.67	7.26	8.47	10.89														4.84
5.86	5.86	7.74	4.35	10.64	7.26	4.67	6.45														6.45
5.37	5.37	5.28	4.43	7.42	6.05	12.1	9.68														3.81
4.3	4.3	3.61	3.55	9.68	8.6	7.74	11.82														17.69
6.91	6.91	4.84	7.6	5.07	8.46	8.98	13.97														4.3
7.59	7.59	4.43	10.75	5	9.67	4.84	4.09														8.06
4.09	4.09	7.91	9.67	12.09	5.24	6.77	7.25														4.29
4.07	4.07	4.4	3.74	3.87	3.19	8.47	8.47														9.67
2.38	2.38	10.36	12.1	4.43	7.52	8.47	6.91														5.72
2.26	2.26	5.58	7.4	9.2	8.47	7.44	8.18														12.98
2.68	2.68	5.21	4.26	4.84	13.31	8.47	5.07														9
8.71	8.71	3.93	5.06	9.68	10.89	5.76	4.46														8.76
8.47	8.47	3.58	5.23	5.29	7.74	7.25	5.28														4.23
7.26	7.26	5.8	3.45	11.43	7.26	8.47	12.9														4.74
6.05	6.05	4.84	6.58	9.68	6.6	8.47	7.26														2.96
12.09	12.09	3.48	3.22	5.64	4.43	8.47	6.91														6.17
4.58	4.58	3.87	4.84	5.04	12.9	8.47	6.75														5.8
6.05	6.05	5.64	4.35	7.25	13.53	5.91	4.84														5.21
5.37	5.37	5.16	5.64	4.15	8.46	7.03	10.62														4.35
13.31	13.31	8.21	5.32	7.26	8.47	7.25	8.47														7.99
6.45	6.45	4.3	3.55	10.85	3.98	7.26	6.29														4.51
5.8	5.8	5.53	7.26	7.74	5.8	5.21	6.05														5.53
7.26	7.26	7.17	6.05	6.23	7.26	7.91	5.69														4.61
8.71	8.71	4.58	4.84	4.53	6.05	6.45	6.31														7.64
10.88	10.88	4.84	4.84	4.58	9.68	4.4	6.45														3.63
8.47	8.47	9.17	6.91	8.79	6.16	5.64	3.22														4.43
4.84	4.84	5.5	4.59	4.84	4.35	4.43	6.05														5.37
8.6	8.6	5.58	9.67	8.71	5.37	6.16	5.74														4.55
5.21	5.21	4.51	11.43	6.18	7.25	9.68	7.25														3.47
5.95	5.95	3.63	7.6	4.23	14.51	4.67	7.25														15.32
5.8	5.8	8.46	8.47	8.47	8.46	3.52	9.68														6.77
6.18	6.18	3.87	9.68	2.66	5.28	3.38	5.8														5.14
10.89	10.89	3.22	5.21	8.47	7.52	5.8	8.47														5.26
6.05	6.05	11.29	6.45	3.34	5.8	3.39	6.45														6.45
4.35	4.35	3.67	9.68	7.26	7.86	6.45	5.69														6.35
3.98	3.98	7.14	7.77	6.05	9.67	5.8	7.26														12.1
9.68	9.68	4.09	7.26	3.87	7.26	5.64	6.6														7.74
4.42	4.42	7.26	4.51	10.89	3.63	8.47	9.68														5.06
9.35	9.35	5.9	9.67	9.67	6.16	5.8	4.21														5.32
3.15	3.15	7.74	5.8	6.05	7.25	8.6	5.44														7.25
10.89	10.89	3.31	5.16	4.55	8.47	6.45	12.1														8.37
4.51	4.51	4.43	9.67	8.47	8.47	3.76	7.26														6.65
11.41	11.41	5.95	6.05	6.05	5.28	14.51	5.64														7.28
9.67	9.67	7.41	5.37	8.47	6.45	10.89	9.68														7.19
2.66	2.66	3.52	6.05	9.67	7.26	5.92	10.89														3.82
5.8	5.8	4.89	6.91	10.75	7.74	6.35	8.47														6.62
3.87	3.87	6.77	8.47	8.6	11.61	5.37	7.26														6.65
2.44	2.44	7.93	8.47	10.89	5.95	5.8	7.26														7.14
2.5	2.5	9.4	4.84	7.26	3.63	9.68	7.25														3.22
2.09	2.09	9.68	10.51	8.06	10.89	5.28	6.77														16.44
2.07	2.07	6.22	9.68	4.3	6.05	5.95	7.25														7.3
2.77	2.77	5.91	9.68	6.83	20.56	5.59	7.25														4.21
4.23	4.23	5.03	5.16	9.84	4.4	4.84	6.05														4.15
6.91	6.91	10.92	4.15	7.26	6.05	6.29	5.74														6.54
7.25	7.25	8.5	9.68	9.68	7.91	6.05	8.47														3.45
3.87	3.87	6.91	3.72	12.1	6.05	5.64	8.44														5.18
9.68	9.68	5.8	6.05	15.72	8.47	7.25	4.84														5.02
5.28	5.28	9.46	8.47	7.52	7.26	5.95	7.25														8.85
3.63	3.63	9.67	8.06	3.22	7.26	6.05	12.1														5.74
7.25	7.25	8.6	8.47	5.55	6.45	8.47	9.68														3.34
8.47	8.47	4.84	7.7	5.21	5.69	5.28	8.47														5.44
9.68	9.68	8.47	6.05	8.47	8.46	3.12	6.16														10.89
9.68	9.68	9.13	5.58	4.15	3.22	8.71	9.67														8.24
7.25	7.25	3.63	4.43	4.22	4.15		4.65														9.68
7.26	7.26	2.53	3.87	6.7	10.75		8.47														6.29
10.89	10.89	6.54	5.91	4.76	6.77		8.47														6.7
5.65	5.65	4.45	5.24	4.23	7.26		5.64														5.32
3.45	3.45	4.4	7.17	8.18	8.47		10.89														7.09
3.12	3.12	9.26	4.53	4.99	9.68		8.47														3.87
10.89	10.89	3.48	4.98	8.47	4.84		10.89														13.31
4.06	4.06	6.11	5.86	2.8	10.62		10.64														5.53
5.53	5.53	5.09	5.08	4.23	7.26		9.68														4.37
5.53	5.53	5.44	4.46	6.54	6.05		6.16														10.89
3.13	3.13	4.84	6.77	8.79	10.88		6.45														6.05
5.21	5.21	5.07	9.68	8.26	6.05		6.91														7.03
6.1	6.1	6.57	3.31	6.16	6.05		6.22														9.68
6.71	6.71	3.37	6.45	4.84	8.47		4.03														7.6
6.05	6.05	5.21	8.47	7.25	14.97		5.2														6.12
4.84	4.84	5.84	2.64	3.39	3.87		5.37														8.69
8.69	8.69	7.74	4.15	8.47	7.87		13.97														4.4
4.79	4.79	5.64	9.68	4.42	7.26		4.03														4.09
5.8	5.8	7.25	8.47	4.03	7.26		6.62														10.89
9.67	9.67	5.21	9	7.21	6.05		5.18														4.12
3.87	3.87	4.83	4.26	12.44	7.26		5.16														5.24
7.13	7.13	4.84	7.44	6.6	6.05		6.77														7.89
6.62	6.62	4.99	5.8	7.19	12.1		3.45														6.54
7.74	7.74	6.91	7.26	3.12	4.96		11.99														3.63
5.95	5.95	9.67	8.47	5.12	7.52		7.06														5.8
3.76	3.76	8.06	4.3	4.49	7.25		5.34														13.19
5.07	5.07	4.61	8.71	5.02	9.67		10.88														3.01
6.29	6.29	3.56	7.03	3.85	7.74		8.29														3.22
9.67	9.67	5.04	7.26	4.64	4.46		5.44														8.47
9.67	9.67	10.02	7.91	4.3	7.74		12.1														9.03
4.35	4.35	3.1	7.52	3.13	8.47		10.51														4.36
5.09	5.09	4.15	8.46	10.32	4.94		7.26														5.69
4.34	4.34	5.8	6.05	9.67	7.64		9														4.66
4	4	6.65	6.05	6.63	8.29		6.13														7.6
3.68	3.68	5.73	9.68	8.47	7.59		4.37														12.1
4.84	4.84	4.91	4.84	4.4	6.65		7.88														7.83
2.53	2.53	7.18	8.47	6.16	3.87		5.03														8.32
5.53	5.53	6.38	4.84	4.84	5.53		9.04														5.64
5.34	5.34	9.67	9.68	5.64	7.08		11.61														4.84
9.6	9.6	6.65	6.45	11.61	8.47		4.61														3.37
5.42	5.42	4.93	7.26	3.41	14.51		6.22														10.88
5.76	5.76	4.84	7.87	4.15	8.47		6.05														4.84
8.29	8.29	9.42	5.28	5.8	6.45		9.67														8.06
10.14	10.14	9.68	8.18	2.79	7.25		6.64														5.24
4.84	4.84	6.31	7.26	5.64	6.77		5.95														7.59
12.58	12.58	4.68	7.26	5.32	10.88		8.06														5.32
5.53	5.53	4.43	8.6	5.67	4.19		7.25														7.47
7.88	7.88	7.28	8.87	7.09	6.45		7.08														5.3
5.8	5.8	12.09	6.91	4.84	4.84		9.67														6.05
5.74	5.74	8.98	4.15	3.11	4.84		8.47														3.83
9.48	9.48	5.53	4.46	7.72	8.47		9.68														3.87
12.1	12.1	5.06	7.26	6.45	8.46		8.47														4.84
7.8	7.8	8.54	10.99	4.68	9.68		7.26														3.29
7.97	7.97	8.47	5.12	5.05	7.26		3.64														4.7
6.54	6.54	6.81	8.06	3.63	12.1		3.8														11.16
4.09	4.09	11.26	5.28	5.53	8.47		7.25														6.7
8.47	8.47	4.46	3.72	4.49	8.26		6.05														6.22
6.05	6.05	10.18	8.47	5.6	9.68		6.05														3.43
5.64	5.64	6.58	9.68	4.84	6.65		5.64														7.6
10.64	10.64	6.45	5.8	8.96	8.47		11.82														7.26
11.18	11.18	3.72	8.46	6.36	6.91		6.77														7.74
7.06	7.06	8.46	6.77	4.3	9.21		8.47														5.44
7.74	7.74	8.87	7.2	3.76	3.63		7.87														10.28
6.11	6.11	8.47	6.26	11.74	8.47		8.47														6.65
8.47	8.47	7.25	7.11	8.71	9.67		6.05														5.53
6.67	6.67	10.48	6.09	15.72	8.47		7.26														3.87
8.75	8.75	8.46	3.11	12.9	5.55		8.47														3.63
8.79	8.79	12.1		3.55	5.37		5.21														5.66
4.22	4.22	6.77		5.53	8.6		6.91														5.64
9.68	9.68	5.3		11.61	7.25		7.26														4.76
4.15	4.15	5.68		7.09	9.68		7.08														2.88
3.15	3.15	7.44		7.62	6.22		5.21														9.68
7.86	7.86	8.47		4.84	9.68		12.1
7.74	7.74	10.18		6.7	8.47		9.67
3.58	3.58	4.96		9.67	8.06		10.89
5.03	5.03	9.67		8.47	8.47		7.26
9.68	9.68	6.2		5.28	7.26		22.3
7.86	7.86	4.27		7.01	9.67		47.17
9.68	9.68	7.57		2.81	3.61		7.47
9.67	9.67	6.45		2.86	7.26
5.6	5.6	4		2.98	5.53
4.94	4.94	9.67		2.99	9.67
7.68	7.68	5.12		7.52	7.26
8.47	8.47	5.28		8.66	6.05
4.07	4.07	6.45		4.84	4.15
5.67	5.67	14.51		4.7	10.89
3.52	3.52	12.58		9.68	6.91
7.35	7.35	6.22		6.04	8.47
11.29	11.29	7.16		9.68	8.47
6.57	6.57	3.92		4.95	7.26
2.38	2.38	4.21		4.26	110.07
10.69	10.69	11.75		5.44
8.79	8.79	4.3		4.98
10.89	10.89	10.66		2.53
6.62	6.62	5.8		4.3
9.68	9.68	4.84		5.72
7.64	7.64	3.41		5.69
5.47	5.47	6.73		8.47
6.51	6.51	8.06		4.84
7.08	7.08	4.74		9.67
9.68	9.68	4.19		4.46
5.72	5.72	3.63		6.45
6.82	6.82	4.09		7.03
4.64	4.64	6.88		5.69
4.73	4.73	10.88		6.45
4.84	4.84	16.93		7.26
8.71	8.71	4.03		8.47
9.68	9.68	11.29		6.9
7.74	7.74	6.77		7.64
4.03	4.03	5.25		2.64
6.05	6.05	7.7		4.44
8.06	8.06	8.26		10.92
3.4	3.4	8.1		5.75
9	9	3.56		10.62
12.1	12.1	7.25		14.51
5.5	5.5	3.87		3.67
9.67	9.67	7.26		5.21
7.26	7.26	4.84		10.42
8.47	8.47	9.68		3.67
12.1	12.1	3.47		5.28
8.46	8.46	3.04		8.5
7.26	7.26	7.79		8.46
6.45	6.45	5.64		8.6
7.91	7.91	6.17		7.26
8.47	8.47	4.84		5.53
8.46	8.46	7.6		107.65
8.47	8.47	9.19		6.91
5.21	5.21	4.84		8.47
6.05	6.05	5.61		6.31
5.8	5.8	2.53		7.26
6.16	6.16	5.8		2.83
9.23	9.23	3.52		4.46
9.68	9.68	3.09		7.26
4.84	4.84	3.05		9.68
8.47	8.47	4.49		6.45
3.22	3.22	4.03		8.47
9.67	9.67	5.3		4.84
4.68	4.68	3.66		8.47
8.37	8.37	4.11		8.06
7.25	7.25	5.41		6.11
9.38	9.38	3.29		3.47
5.45	5.45	6.6		10.88
4.84	4.84	2.27		4.43
8.91	8.91	6.91		3.12
8.61	8.61	4.34		7.93
7.26	7.26	4.03		8.06
3.2	3.2	7.74		7.09
3.48	3.48	4.15		5.76
6.3	6.3	6.91		5.37
7.24	7.24	4.95		8.18
7.6	7.6	7.06		8.2
8.44	8.44	4.32		5.53
7.01	7.01	4.84		11.53
6.51	6.51	5		9.68
6.58	6.58	9.22		4.33
6.05	6.05	5.37		5.12
5.08	5.08	5.21		3.52
3.78	3.78	9.92		4.71
3.68	3.68	4.46		6.05
5.21	5.21	5.09		12.21
8.93	8.93	8.06		4.61
6.45	6.45	4.02		4.46
7.86	7.86	4.3		12.9
4.84	4.84	5.53		5.16
4.3	4.3	3.96		5.55
6.05	6.05	4.23		6.7
4.43	4.43	6.7		5.48
7.64	7.64	2.98		5.8
5.37	5.37	4.15		3.35
4.72	4.72	5.05		6.91
9.68	9.68	5.9		8.06
8.38	8.38	9.67		6.73
12.09	12.09	5.8		3.92
6.19	6.19	7.52		6.22
4.84	4.84	5.95		5.36
8.71	8.71	5.95		9.51
6.45	6.45	6.45		4.03
4.23	4.23	3.72		5.23
4.84	4.84	6.22		4.84
7.31	7.31	3.22		6.45
8.06	8.06	7.97		4.49
10.89	10.89	5.8		2.73
10.48	10.48	5.53		7.26
4.3	4.3	5.04		4.84
7.52	7.52	11.82		4.38
5.95	5.95	3.45		6.22
5.37	5.37	4.4		5.91
5.3	5.3	7.73		12.43
12.65	12.65	10.64		11.65
5.64	5.64	3.22		7.64
3.72	3.72	12.09		6.05
3.57	3.57	3.82		7.25
7.46	7.46	8.47		4.51
3.97	3.97	5.37		5.72
13.65	13.65	8.35		7.25
8.06	8.06	4.09		7.26
13.19	13.19	4.94		2.81
3.93	3.93	3.7		4.02
10.64	10.64	3.22		3
4.15	4.15	5.28		3.89
6.78	6.78	7.33		4.32
2.97	2.97	7.25		7.24
6.86	6.86	6.62		8.46
7.25	7.25	3.87		7.66
5.03	5.03	4.35		3.94
4.61	4.61	8.24		5.82
4.01	4.01	8.71		9.67
5.07	5.07	9.67		5.73
4.35	4.35	5.84		3.82
8.47	8.47	3.15		7.25
3.41	3.41	3.77		6.24
8.47	8.47	4.19		7.26
5.21	5.21	7.09		3.36
6.05	6.05	4.09		8.06
84.67	84.67	8.76
7.26	7.26	6.45
7.26	7.26	3.87
12.1	12.1	12.1
8.47	8.47	6.29
15.11	15.11	9.43
6.45	6.45	9.67
4.84	4.84	4.84
4.46	4.46	5.55
5.8	5.8	10.89
3.93	3.93	5.64
5.72	5.72	6.45
10.59	10.59	5.33
5.8	5.8	6.53
6.91	6.91	9.07
8.29	8.29	7.68
8.46	8.46	3.15
5.17	5.17	3.35
3.68	3.68	3.43
3.22	3.22	8.64
4.25	4.25	4.16
7.64	7.64	3.27
6.45	6.45	4.53
4.84	4.84	6.23
5.44	5.44	3.33
7.25	7.25	5.8
7.25	7.25	4.9
4.58	4.58	4.15
7.25	7.25	8.51
4.84	4.84	10.64
4.4	4.4	10.89
9.67	9.67	7.52
6.26	6.26	6.05
7.44	7.44	4.84
7.25	7.25	3.49
8.06	8.06	4.08
6.65	6.65	7.03
6.97	6.97	4.23
10.49	10.49	5.32
5.18	5.18	6.27
5.83	5.83	5.61
6.07	6.07	10.89
3.65	3.65	8.47
5.64	5.64	6.51
7.25	7.25	8.4
4.51	4.51	6.65
8.87	8.87	7.26
6.52	6.52	7.26
7.58	7.58	5.18
7.26	7.26	7.26
5.91	5.91	7.08
4.84	4.84	7.26
8.23	8.23	8.47
4.8	4.8	8.65
6.67	6.67	8.6
4.84	4.84	4.41
9.36	9.36	5.87
6.16	6.16	5.62
5.91	5.91	4.92
4.07	4.07	6.65
8.47	8.47	9.4
6.72	6.72	6.45
8.96	8.96	5.64
10.35	10.35	6.05
4.66	4.66	3.87
4.37	4.37	9.68
8.29	8.29	6.27
6.7	6.7	3.34
5.37	5.37	7.6
6.75	6.75	7.95
7.52	7.52	6.22
7.52	7.52	7.25
9.68	9.68	9.67
12.51	12.51	3.25
5.25	5.25	2.04
4.26	4.26	3.45
4.44	4.44	3.6
4.51	4.51	6.16
8.47	8.47	7.36
8.47	8.47	8.29
9.89	9.89	5.44
20.73	20.73	6.24
5.58	5.58	8.06
4.12	4.12	5.14
5.8	5.8	3.96
5.37	5.37	8.2
3.63	3.63	6.03
5.53	5.53	8.47
6.36	6.36	2.72
3.28	3.28	6.83
5.64	5.64	8.47
12.44	12.44	6.45
5.64	5.64	6.64
6.99	6.99	8.71
1.94	1.94	7.09
2.12	2.12	7.25
1.99	1.99	6.45
3.34	3.34	4.03
1.99	1.99	7.25
2.87	2.87	3.63
2.21	2.21	6.05
3.64	3.64	12.09
3.2	3.2	8.47
3.24	3.24	8.47
3.99	3.99	4.15
4.47	4.47	3.22
3.27	3.27	3.39
3	3	6.34
3.64	3.64	5.3
2.11	2.11	3.87
2.64	2.64	7.26
1.67	1.67	7.83
1.54	1.54	6.18
2.15	2.15	6.17
1.95	1.95	7.08
3.26	3.26	6.6
3.28	3.28	4.51
3.43	3.43	3.63
2.26	2.26	7.26
2.24	2.24	4.53
4.28	4.28	7.15
6.01	6.01	6.91
3.67	3.67	6.77
3.04	3.04	4.49
2.64	2.64	6.64
2.08	2.08	4.37
3.45	3.45	3
4.23	4.23	3.77
3.46	3.46	5.95
2.68	2.68	7.57
3.61	3.61	9.67
2.33	2.33	10.77
1.65	1.65	6.05
3.76	3.76	5.8
2.39	2.39	5.03
3.91	3.91	4.59
2.26	2.26	8.87
4.94	4.94	8.47
3.55	3.55	3.05
1.73	1.73	7.24
2.67	2.67	9.96
2.65	2.65	3.12
1.89	1.89	4.58
2.76	2.76	10.42
2.08	2.08	5.6
2.47	2.47	7.44
2.05	2.05	4.64
2.96	2.96	2.57
2.16	2.16	5.66
2.43	2.43	6.18
3.03	3.03	5.37
2.83	2.83	8.54
2.37	2.37	6.45
1.66	1.66	7.25
2.11	2.11	4.84
2.92	2.92	3.35
1.6	1.6	7.74
2.49	2.49	5.87
2.77	2.77	4.15
3.73	3.73	9.39
1.95	1.95	7.79
2.63	2.63	5.12
1.8	1.8	7.26
2.55	2.55	3.97
2.29	2.29	2.56
2.67	2.67	6.05
2.36	2.36	5.09
2.23	2.23	4.15
3.05	3.05	8.94
2.89	2.89	4.55
3.41	3.41	4.4
1.79	1.79	5.87
3.91	3.91	4.84
4.12	4.12	5.8
4.84	4.84	4.58
6.45	6.45	5.26
8.18	8.18	10.67
2.35	2.35	4.51
2.23	2.23	5.93
1.94	1.94	9.68
2.01	2.01	6.22
4.6	4.6	6.91
2.86	2.86	3.35
5.28	5.28	5.82
9.67	9.67	7.6
7.8	7.8	7.52
4.63	4.63	10.89
7.69	7.69	3.07
4.06	4.06	7.26
4.46	4.46	10.88
4.84	4.84	5.72
7.03	7.03	12.36
7.25	7.25	2.85
8.06	8.06	7.6
4.23	4.23	4.51
8.71	8.71	9.07
7.77	7.77	4.26
3.8	3.8	3.05
20.97	20.97	7.13
6.99	6.99	5.8
7.23	7.23	5.58
9.67	9.67	7.01
3.67	3.67	4.03
6.77	6.77	8.47
4.84	4.84	14.51
4.64	4.64	5.37
6.05	6.05	9.67
6.05	6.05	3.96
6.11	6.11	3.93
7.64	7.64	4.27
8.22	8.22	3.72
3.98	3.98	5.44
2.69	2.69	5.31
2.53	2.53	4.67
6.77	6.77	8.06
12.1	12.1	3.58
5.5	5.5	5.28
25.28	25.28	6.13
4.97	4.97	5.82
4.84	4.84	3.22
5.84	5.84	9.82
7.14	7.14	7.55
5.91	5.91	7.03
7.25	7.25	5.61
3.39	3.39	11.52
6.29	6.29	10.32
6	6	6.6
5.16	5.16	6.29
4.94	4.94	4.15
7.14	7.14	10.55
8.47	8.47	3.45
5.58	5.58	8.46
6.83	6.83	4.98
5.55	5.55	5.37
6.45	6.45	2.85
2.66	2.66	3.33
3.67	3.67	3.74
7.25	7.25	6.85
2.85	2.85	3.81
8.46	8.46	3.76
10.89	10.89	3.82
8.71	8.71	6.45
8.47	8.47	7.25
8.62	8.62	8.47
7.34	7.34	10.64
4.15	4.15	3.36
5.94	5.94	3.87
4.35	4.35	4.5
5	5	4.93
7.8	7.8	6.02
10.48	10.48	5.11
8.71	8.71	6
2.48	2.48	6.16
2.08	2.08	6.29
2.68	2.68	3.17
3.59	3.59	6.54
6.77	6.77	3.87
2.9	2.9	9.3
5.07	5.07	6.45
7.35	7.35	17.88
12.1	12.1	10.62
7.87	7.87	5.37
6.6	6.6	6.45
5.58	5.58	2.73
5.69	5.69	3.59
8.47	8.47	4.4
5.53	5.53	5.03
7.52	7.52	9.68
8.47	8.47	5.09
6.05	6.05	5.37
8.47	8.47	4.51
7.26	7.26	7.91
8.47	8.47	7.97
18.14	18.14	6.32
4.84	4.84	4.84
4.46	4.46	8.24
7.52	7.52	5.64
7.2	7.2	6.05
6.16	6.16	3.93
3.96	3.96	8.87
8.14	8.14	9.68
6.45	6.45	3.89
5.12	5.12	5.69
2.62	2.62	8.2
5.91	5.91	4.09
3.05	3.05	3.34
12.1	12.1	3.6
8.6	8.6	10.08
8.06	8.06	9.68
4.23	4.23	7.25
13.7	13.7	3.93
7.26	7.26	9.19
7.26	7.26	9.68
7.35	7.35	9.67
8.46	8.46	10.59
12.9	12.9	4.4
3.91	3.91	5.61
7.28	7.28	5.77
9.14	9.14	4.99
5.8	5.8	4.3
9.46	9.46	7.64
3.76	3.76	10.43
4.15	4.15	5.64
7.44	7.44	7.39
9.03	9.03	10.63
8.18	8.18	5.53
8.47	8.47	5.48
6.77	6.77	7.25
6.05	6.05	4.05
7.25	7.25	4.09
4.23	4.23	11.43
4.69	4.69	4.84
5.53	5.53	7.25
7.74	7.74	5.99
45.96	45.96	3.7
6.27	6.27	5.92
3.31	3.31	6.7
4.49	4.49	3.87
4.35	4.35	10.33
3.45	3.45
6.85	6.85
5.77	5.77
10.36	10.36
7.08	7.08
7.52	7.52
4.23	4.23
9.68	9.68
7.26	7.26
7.26	7.26
5.28	5.28
8.47	8.47
4.15	4.15
3.45	3.45
3.06	3.06
7.25	7.25
13.31	13.31
8.47	8.47
5.16	5.16
4.18	4.18
8.89	8.89
6.64	6.64
4.84	4.84
7.26	7.26
9.68	9.68
6.05	6.05
7.26	7.26
7.26	7.26
9.68	9.68
4.65	4.65
8.47	8.47
8.47	8.47
6.79	6.79
7.25	7.25
6.05	6.05
3.67	3.67
9.68	9.68
6.75	6.75
6.16	6.16
6.05	6.05
6.17	6.17
10.89	10.89
5.8	5.8
6.31	6.31
8.46	8.46
9.68	9.68
7.26	7.26
7.26	7.26
7.52	7.52
7.25	7.25
8.47	8.47
9.68	9.68
7.52	7.52
8.6	8.6
5.28	5.28
7.25	7.25
8.47	8.47
7.36	7.36
6.56	6.56
5	5
5.25	5.25
3.39	3.39
5.28	5.28
7.25	7.25
6.05	6.05
8.71	8.71
8.46	8.46
4.55	4.55
5.95	5.95
4.28	4.28
3.43	3.43
3.15	3.15
5.14	5.14
3.48	3.48
5.69	5.69
11.52	11.52
8.47	8.47
9.68	9.68
7.25	7.25
5.8	5.8
5.8	5.8
5.01	5.01
6.22	6.22
4.4	4.4
8.47	8.47
5.8	5.8
13.67	13.67
4.58	4.58
3.77	3.77
8.46	8.46
5.42	5.42
5.62	5.62
6.29	6.29
3.11	3.11
9.68	9.68
5.77	5.77
6.45	6.45
3.87	3.87
5.97	5.97
4.15	4.15
2.93	2.93
5	5
11.82	11.82
6.29	6.29
4.84	4.84
4.26	4.26
6.67	6.67
4.55	4.55
5.28	5.28
3.72	3.72
5.88	5.88
6.95	6.95
4.84	4.84
7.09	7.09
6.96	6.96
4.37	4.37
6.01	6.01
3.68	3.68
3.17	3.17
5.44	5.44
3.7	3.7
6.96	6.96
8.06	8.06
11.29	11.29
4.84	4.84
7.03	7.03
5.69	5.69
8.06	8.06
4.66	4.66
4.51	4.51
5.6	5.6
2.92	2.92
4.03	4.03
5.07	5.07
8.44	8.44
6.7	6.7
5.16	5.16
4.06	4.06
9.5	9.5
6.46	6.46
6.29	6.29
11.64	11.64
4.03	4.03
5.72	5.72
3.76	3.76
7.52	7.52
3.97	3.97
3.35	3.35
8.24	8.24
7.25	7.25
7.26	7.26
8.46	8.46
3.63	3.63
4.69	4.69
3.72	3.72
9.68	9.68
9.68	9.68
15.34	15.34
3.12	3.12
4.46	4.46
6.99	6.99
4.08	4.08
7.98	7.98
8.6	8.6
6.05	6.05
5.35	5.35
5.53	5.53
4.26	4.26
6.45	6.45
7.91	7.91
12.09	12.09
14.51	14.51
5.53	5.53
3.41	3.41
10.21	10.21
5.37	5.37
6.22	6.22
5.86	5.86
6.22	6.22
7.74	7.74
9.67	9.67
5.64	5.64
6.81	6.81
6	6
5.55	5.55
6.26	6.26
8.06	8.06
7.52	7.52
7.07	7.07
3.92	3.92
3.93	3.93
7.91	7.91
3.02	3.02
7.25	7.25
5.8	5.8
8.22	8.22
7.64	7.64
4.9	4.9
4.42	4.42
9.67	9.67
5.37	5.37
4.51	4.51
6.99	6.99
5.96	5.96
4.46	4.46
5.16	5.16
3.69	3.69
3.66	3.66
7.07	7.07
6.05	6.05
5.03	5.03
3.8	3.8
4.62	4.62
8.47	8.47
4.84	4.84
4.46	4.46
6.91	6.91
12.38	12.38
5.44	5.44
7.74	7.74
8.29	8.29
9.89	9.89
5.95	5.95
6.4	6.4
16.37	16.37
2.9	2.9
6	6
3.87	3.87
5.04	5.04
6.26	6.26
2.74	2.74
8.84	8.84
7.2	7.2
10.89	10.89
8.47	8.47
9.68	9.68
8.46	8.46
10.64	10.64
6.45	6.45
8.46	8.46
6.22	6.22
10.89	10.89
5.73	5.73
5.06	5.06
5.28	5.28
8.47	8.47
7.26	7.26
6.45	6.45
7.26	7.26
4.1	4.1
7.26	7.26
10.89	10.89
4.43	4.43
9.67	9.67
27.82	27.82
2.47	2.47
7.26	7.26
7.26	7.26
8.6	8.6
8.29	8.29
9.67	9.67
6.39	6.39
12.09	12.09
8.47	8.47
4.19	4.19
7.6	7.6
3.22	3.22
5.21	5.21
6.02	6.02
4.84	4.84
4.6	4.6
5.1	5.1
48.38	48.38
4.15	4.15
11.16	11.16
5.07	5.07
6.26	6.26
10.88	10.88
6.77	6.77
4	4
7	7
5.44	5.44
3.12	3.12
4.37	4.37
5.91	5.91
4.15	4.15
5.79	5.79
4.84	4.84
7.14	7.14
9.02	9.02
8.71	8.71
5.99	5.99
8.47	8.47
6.16	6.16
6.6	6.6
8.21	8.21
3.14	3.14
5.08	5.08
11.16	11.16
6.65	6.65
5.72	5.72
10.89	10.89
8.46	8.46
7.25	7.25
4.68	4.68
3.87
6.37
5.13
10.12
4.4
2.65
4.66
8.07
6.65
3.13
7.26
6.29
7.39
6.03
5.48
6.05
3.5
12.09
10.89
4.76
4.06
7.74
6.42
9.67
9.68
6.05
4.3
8.47
8.26
7.26
13.31
7.25
9.67
6.45
7.74
7.08
5.45
7.26
6.16
3.87
6.77
4.84
10.89
7.25
7.26
8.47
5.44
7.81
5.8
8.26
5.69
5.53
9.68
8.47
5.12
8.23
5.76
6.91
9.68
9.87
4.4
9.68
6.64
7.25
6.45
6.05
8.47
5.53
8.47
5.8
8.71
9.67
3.74
9.67
3.45
7.26
9.67
8.87
4.84
6.91
8.47
5.32
7.66
6.05
8.47
3.96
7.13
2.88
7.6
6.05
4.73
9.07
7.85
8.47
4.15
4.84
6.28
8.26
5.88
3.22
8.61
9.68
4.19
9.67
10.89
6.62
4.3
3.98
9.67
10.89
7.38
7.26
9
3.02
8.87
4.84
6.12
5.37
6.27
6.7
7.26
13.3
9.26
7.74
9.68
9.67
8.47
9.68
9.67
6.91
7.25
2.74
6.28
5.69
8.36
5.12
4.37
5.02
7.26
5.64
8.47
6.45
5.37
3.62
6.07
4.71
5.37
5.69
3.87
7.56
7.74
4.24
7.26
7.26
4.65
6.72
6.91
8.46
5.03
4.84
5.8
8.79
8.47
5.64
7.25
7.03
5.95
7.26
6.4
7.39
4.23
7.25
7.91
6.99
2.15
7.44
9.23
8.73
6.45
4.99
5.8
15.72
4.18
8.47
8.6
6.45
7.26
6.91
8.47
7.26
6.77
6.45
7.26
6.16
4.84
5.91
6.45
7.26
8.47
6.77
8.98
4.15
3.59
7.8
6.05
8.47
5.04
8.47
7.72
16.12
3.68
9.78
8.22
7.91
4.64
3.94
6.05
8.47
9.68
12.1
3.79
7.25
6.77
7.74
6.05
9.68
10.89
5.32
8.47
9.67
3.63
4.4
8.47
8.47
9.68
7.26
4.4
6.39
7.52
6.31
3.22
9.68
9.19
5.19
7.26
10.23
4.23
6.88
5.47
4.1
5.72
5.8
8.47
6.6
4.51
7.26
6.05
6.85
7.01
5.94
8.47
4.84
6.05
7.25
9.68
7.17
4.63
2.6
3.52
6.11
5.53
3.55
5.8
4.35
3.48
2.98
11.05
6.91
5.32
6.77
3.56
9.68
6.16
6.45
4.84
9.68
6.6
6.13
4.84
7.25
5.8
8.47
9.68
35.08
4.4
6.99
7.26
7.26
7.26
14.51
8.47
8.46
3.66
5.21
8.47
6.77
10.89
7.26
7.26
4.46
9.68
9.67
6.05
6.16
9.67
7.26
7.74
4.58
7.22
7.74
5.77
3.8
5.05
5.64
6.24
7.44
7.26
6.05
9.67
8.46
8.47
9.68
8.46
8.47
8.23
7.52
7.26
8.46
8.47
5.95
5.8
7.03
8.46
6.91
6.27
8.47
9.87
5
6.45
6.16
7.59
7.91
7.26
4.84
9.68
6.18
6.31
5.8
8.47
8.87
6.77
6.48
9.21
9.07
6.65
9.19
7.26
7.26
8.46
8.47
4.84
8.47
6.45
4.15
5.28
9.67
5.53
7.03
8.87
12.09
3.72
7.4
6.62
6.31
7.25
8.06
9.67
5.07
6.05
2.95
6.13
6.91
7.26
8.47
9.68
7.26
7.26
5.8
10.89
2.33
8.47
8.46
6.05
7.26
3.98
8.46
6.05
9.68
7.25
9.68
6.65
8.47
9.68
8.46
9.08
3.45
7.26
9.87
11.29
6.73
5.7
5.21
3.96
4.3
3.33
4.84
9.67
7.66
6.91
8.18
7.13
6.91
4.03
3.32
6.96
4.46
6.77
2.73
6.13
5.49
4.99
7.74
5.09
13.82
10.89
4.84
3.14
3.8
8.46
4.15
12.28
6.45
6.14
7.9
13.3
2.89
4.84
3.97
12.1
4.62
6.7
5.34
7.74
10.73
7.77
4
6.26
5.63
5.62
3.54
3.63
12.9
3.28
2.47
5.19
8.93
7.57
8.46
4.84
4.64
4.46
5.28
6.13
5.72
6.91
2.58
4.46
13.82
4.95
6.6
4.74
6.22
8.47
5.32
7.83
3.87
6.99
14.61
7.74
9.67
2.7
6.19
3.01
8.71
3.04
10.89
7.03
6.77
3.76
4.4
4.51
8.06
3.22
6.45
9.68
7.26
9.68
9.33
6.05
6.6
7.26
8.26
8.46
8.47
7.25
8.47
5.8
5.85
12.1
8.26
8.47
94.35
7.91
4.4
3.87
5.97
7.74
6.69
6.75
8.2
7.44
4.61
4.35
5.94
3.87
4.39
8.47
8.26
9.68
7.56
9.83
5.44
6.79
12.09
8.38
3.59
5.74
6.28
9.67
10.59
3.22
5.5
5.72
3.56
9.57
6.73
6.11
3.14
7.43
8.06
7.52
5.24
4.03
5.37
3.43
4.21
9.67
5.91
8.34
3.22
3.67
4.4
7.25
6.05
4.66
5.18
6.22
9.67
11.58
3.02
9.68
9.67
6.16
6.45
3.18
8.29
7.37
5.37
4.84
5.6
5.43
[truncated: 9,571 more rows]
