# Supplementary material for: Genome-wide occupancy reveals the localization of H1T2 (H1fnt) to repeat regions and a subset of transcriptionally active chromatin domains in rat spermatids
Source: Epigenetics Chromatin. 2021 Jan 6;14:3. doi: 10.1186/s13072-020-00376-2 (PMC7788777; doi:10.1186/s13072-020-00376-2)
Supplement: Supplementary file 10 — Additional file 10: Table S8. GO enrichment analysis of the genes whose promoter-TSS is occupied by H1T2. Excel file related to Fig. 4b: GO analysis_DAVID_Biological processes. [file 13072_2020_376_MOESM10_ESM.xlsx]

## Sheet: GO Biological processes
Category	Term	Count	%	PValue	Genes	List Total	Pop Hits	Pop Total	Fold Enrichment	Bonferroni	Benjamini	FDR
GOTERM_BP_2	GO:0016043~cellular component organization	120	38.5852	2.76519e-05	DLC1, ADCY3, HIST2H2AA3, MAU2, VAPB, EIF5, CAPZA1, PDLIM3, SART3, ACBD5, RAB1A, HOOK3, CD47, SEZ6L2, SLC16A1, S1PR1, H2AFV, AAK1, SLC4A1, NEGR1, TBPL1, SCAMP5, CUTA, PTPRM, ROCK1, TTC7A, C2CD5, CSNK1G2, MTA2, CECR2, SKP1, ST13, PYGO1, HMGB2, SRSF10, UBA6, ARPC4, ARF6, ARPC5, TK2, NPHP4, CERS2, CNOT6L, DNAAF1, SCARB2, EIF3J, PPP2R2D, PLAGL2, KLF5, EEF1A1, KANSL3, UST, AK3, SRSF2, MSL1, SMARCC1, CH…	265	5778	17486	1.3704	0.00397401	0.00397401	0.0327827
GOTERM_BP_2	GO:0044238~primary metabolic process	174	55.9486	0.000237141	ADCY3, DLC1, PDP1, RALY, HIST2H2AA3, ILKAP, MRPL41, VAPB, FAM20C, EIF5, CNOT3, EIF5B, SART3, KLHL8, PGPEP1, SLC16A1, S1PR1, H2AFV, SLC25A24, AAK1, HOXC5, ENOPH1, TWIST2, TBPL1, PHOX2A, PABPN1, PTPRM, ROCK1, CSNK1G2, MTA2, PRKAB2, BTBD6, SKP1, RBPMS, DCAF8, SPDEF, PYGO1, DDX31, TGIF1, ZFP513, ADAMTS5, CAMTA1, HMGB2, SRSF10, UBA6, MYBL1, LIN28A, MIR210, TK2, ARNT, OAZ2, CNOT6L, CERS2, TEF, ANKIB1, …	265	9586	17486	1.19772	0.0335757	0.0169312	0.280823
GOTERM_BP_2	GO:0071704~organic substance metabolic process	180	57.8778	0.000356663	ADCY3, DLC1, PDP1, RALY, HIST2H2AA3, ILKAP, MRPL41, VAPB, FAM20C, EIF5, CNOT3, EIF5B, SART3, RAB1A, KLHL8, PGPEP1, SLC16A1, S1PR1, H2AFV, SLC25A24, AAK1, HOXC5, ENOPH1, TWIST2, TBPL1, PHOX2A, PABPN1, PTPRM, ROCK1, CSNK1G2, MTA2, PRKAB2, BTBD6, SKP1, RBPMS, DCAF8, SPDEF, PYGO1, DDX31, TGIF1, ZFP513, ADAMTS5, CAMTA1, HMGB2, SRSF10, PABPC4, UBA6, MYBL1, LIN28A, MIR210, TK2, ARNT, OAZ2, CNOT6L, CERS2…	265	10059	17486	1.18076	0.0500715	0.0169771	0.422087
GOTERM_BP_2	GO:0019222~regulation of metabolic process	112	36.0129	0.000482245	RALY, DLC1, HIST2H2AA3, ILKAP, VAPB, FAM20C, EIF5, EIF5B, CNOT3, ITSN1, SART3, RAB1A, S1PR1, H2AFV, HOXC5, TWIST2, PHOX2A, ROCK1, MTA2, PRKAB2, BTBD6, RBPMS, PYGO1, SPDEF, TGIF1, ZFP513, CAMTA1, HMGB2, SRSF10, PABPC4, MYBL1, LIN28A, MIR210, ARNT, OAZ2, CNOT6L, TEF, ANKIB1, PABPC1, EIF3J, PLAGL2, KLF5, EEF1A1, SRSF2, PRKAR1B, SMARCC1, HIVEP2, KCTD13, ST5, GTF3A, E2F6, FIGNL1, EZH2, PRKAG2, FOXK2, …	265	5639	17486	1.31057	0.0671026	0.0172151	0.570317
GOTERM_BP_2	GO:0044085~cellular component biogenesis	62	19.9357	0.000665652	DLC1, CLSTN2, ATL1, EIF5, CAPZA1, RHOQ, CTCF, SART3, PTEN, NAP1L4, RAB1A, BAG5, LSM14A, BAG6, S1PR1, SLC4A1, TMEM107, COX18, GNL1, KPNB1, TBPL1, KCNG1, CUTA, RAP2A, ATPAF2, ROCK1, FOXJ1, EXOSC7, ADNP, PKN2, MINK1, UBE2B, ECT2, ST13, ISCA2, ARPC5L, DDX31, DHPS, SRSF10, ARF6, ARHGAP35, ARPC4, ARPC5, TUBGCP3, NPHP4, CNOT6L, DNAAF1, NEDD4L, AGO4, EIF3J, APBA1, PLAGL2, KLF5, EEF1A1, BRD2, MAT2A, AK3, …	265	2705	17486	1.51241	0.0914323	0.0189945	0.786437
GOTERM_BP_2	GO:0044707~single-multicellular organism process	115	36.9775	0.000853759	DLC1, ADCY3, FAM20C, PDLIM3, CNOT3, SART3, RAB1A, HOOK3, ATP2B1, SEZ6L2, S1PR1, HOXC5, NEGR1, TWIST2, SCAMP5, PHOX2A, PTPRM, ROCK1, TTC7A, CECR2, BTBD6, TNNT1, PYGO1, SPDEF, TGIF1, ZFP513, ADAMTS5, ORAI1, HMGB2, PABPC4, UBA6, ARF6, ARPC5, LIN28A, MIR210, ARNT, NPHP4, CERS2, DNAAF1, TEF, SCARB2, DDIAS, MN1, PLAGL2, KLF5, EEF1A1, FIBP, CRIP2, UST, OMP, AK3, RHD, AK4, AK8, PRKAR1B, SMARCC1, CHRNB4, …	265	5907	17486	1.28462	0.115731	0.0202903	1.00765
GOTERM_BP_2	GO:0009058~biosynthetic process	109	35.0482	0.00121435	RALY, ADCY3, HIST2H2AA3, ILKAP, MRPL41, EIF5, EIF5B, CNOT3, S1PR1, H2AFV, SLC25A24, HOXC5, ENOPH1, TBPL1, TWIST2, PHOX2A, MTA2, PRKAB2, RBPMS, PYGO1, SPDEF, TGIF1, ZFP513, CAMTA1, HMGB2, MYBL1, LIN28A, TK2, MIR210, ARNT, CERS2, CNOT6L, TEF, EIF3J, PLAGL2, KLF5, EEF1A1, UAP1, MRPS24, AK3, MPC1, AK4, AK8, SMARCC1, HIVEP2, KCTD13, GTF3A, E2F6, HEXA, EZH2, FOXK2, RHOQ, CTCF, DPY19L3, PTEN, ACVR1B, AL…	265	5583	17486	1.28826	0.16052	0.0246863	1.43044
GOTERM_BP_2	GO:0044237~cellular metabolic process	169	54.3408	0.00173105	ADCY3, PDP1, DLC1, RALY, HIST2H2AA3, ILKAP, MRPL41, VAPB, FAM20C, EIF5, CNOT3, EIF5B, ITSN1, SART3, RAB1A, KLHL8, S1PR1, H2AFV, SLC25A24, AAK1, HOXC5, ENOPH1, TWIST2, TBPL1, PHOX2A, PABPN1, PTPRM, ROCK1, CSNK1G2, MTA2, PRKAB2, BTBD6, SKP1, RBPMS, DCAF8, SPDEF, PYGO1, DDX31, TGIF1, ZFP513, CAMTA1, HMGB2, SRSF10, UBA6, MYBL1, LIN28A, MIR210, TK2, ARNT, OAZ2, CERS2, CNOT6L, TEF, ANKIB1, EIF3J, PABPC…	265	9551	17486	1.16757	0.2208	0.0307047	2.03338
GOTERM_BP_2	GO:0006807~nitrogen compound metabolic process	117	37.6206	0.00230894	RALY, ADCY3, HIST2H2AA3, ILKAP, MRPL41, VAPB, FAM20C, EIF5, EIF5B, CNOT3, SART3, S1PR1, H2AFV, SLC25A24, HOXC5, ENOPH1, TWIST2, TBPL1, PHOX2A, MTA2, RBPMS, PYGO1, SPDEF, DDX31, TGIF1, ZFP513, CAMTA1, HMGB2, SRSF10, MYBL1, LIN28A, TK2, MIR210, ARNT, OAZ2, CERS2, CNOT6L, TEF, PABPC1, EIF3J, PPP2R2D, PLAGL2, KLF5, EEF1A1, UAP1, MRPS24, AK3, MPC1, HDDC3, AK4, AK8, SRSF2, SMARCC1, HIVEP2, RNPC3, KCTD1…	265	6185	17486	1.24822	0.283138	0.0363102	2.70372
GOTERM_BP_2	GO:0048856~anatomical structure development	105	33.7621	0.00549587	DLC1, FAM20C, PDLIM3, CNOT3, SART3, RAB1A, HOOK3, ATP2B1, SEZ6L2, S1PR1, HOXC5, NEGR1, TBPL1, TWIST2, PHOX2A, PTPRM, ROCK1, TTC7A, CSNK1G2, BTBD6, CECR2, PYGO1, SPDEF, TGIF1, ADAMTS5, ZFP513, ORAI1, HMGB2, PABPC4, UBA6, ARF6, ARPC5, LIN28A, ARNT, NPHP4, CERS2, DNAAF1, TEF, SCARB2, DDIAS, PLAGL2, KLF5, EEF1A1, CRIP2, UST, OMP, AK3, RHD, AK4, AK8, SMARCC1, HIVEP2, GPATCH4, CLSTN2, ATL1, HEXA, EZH2,…	265	5571	17486	1.24366	0.547781	0.0762916	6.32565
GOTERM_BP_2	GO:0044767~single-organism developmental process	106	34.0836	0.0058971	DLC1, FAM20C, PDLIM3, CNOT3, SART3, RAB1A, HOOK3, ATP2B1, SEZ6L2, S1PR1, HOXC5, NEGR1, TBPL1, TWIST2, PHOX2A, PTPRM, ROCK1, TTC7A, CSNK1G2, BTBD6, CECR2, PYGO1, SPDEF, TGIF1, ADAMTS5, ZFP513, ORAI1, HMGB2, PABPC4, UBA6, ARF6, ARPC5, LIN28A, ARNT, NPHP4, CERS2, DNAAF1, TEF, SCARB2, DDIAS, PLAGL2, KLF5, EEF1A1, CRIP2, UST, OMP, AK3, RHD, AK4, AK8, SMARCC1, HIVEP2, GPATCH4, CLSTN2, ATL1, HEXA, EZH2,…	265	5646	17486	1.23882	0.573309	0.0745054	6.77279
GOTERM_BP_2	GO:0019882~antigen processing and presentation	7	2.2508	0.0101572	RT1-CE15, RT1-CE2, RT1-CE1, RT1-CE6, RT1-CE4, FCGR2A, AP3B1	265	121	17486	3.81731	0.770101	0.115303	11.4013
GOTERM_BP_2	GO:1903046~meiotic cell cycle process	8	2.57235	0.0230781	ADCY3, TUBGCP3, ING2, BAG6, MUS81, AGO4, UBB, UBE2B	265	186	17486	2.83806	0.965341	0.227892	24.1833
GOTERM_BP_2	GO:0009056~catabolic process	36	11.5756	0.0386353	HEXA, RNPEPL1, PRKAG2, CNOT3, UBA6, LIN28A, PTEN, PLBD2, BAG5, OAZ2, ZFP36L2, KLHL8, BAG6, PEX2, CNOT6L, MUS81, ETFDH, ANKIB1, NEDD4L, PABPC1, AGO4, AGAP2, PPP2R2D, ECI2, EXOSC7, BTBD6, UBE2I, SKP1, UBE2B, RHBDD3, SMARCC1, UBC, KHSRP, DHPS, UBB, KCTD13	265	1708	17486	1.39078	0.996565	0.333204	37.3241
GOTERM_BP_2	GO:0007289~spermatid nucleus differentiation	3	0.96463	0.0394911	HMGB2, PYGO1, TBPL1	265	21	17486	9.42642	0.996979	0.320775	37.9825
GOTERM_BP_2	GO:0048522~positive regulation of cellular process	86	27.6527	0.0427517	DLC1, CLSTN2, VAPB, EZH2, FAM20C, PRKAG2, FOXK2, RHOQ, CTCF, ITSN1, SART3, PTEN, RAB1A, LSM14A, CD47, ACVR1B, BAG6, TNFRSF11A, S1PR1, AAK1, SLC4A1, BRD4, MAPKBP1, AGAP2, NEGR1, TWIST2, SCAMP5, AP3B1, PHOX2A, RAP2A, ADAM10, ROCK1, C2CD5, FOXJ1, MTA2, PKN2, ADNP, ARHGEF16, MINK1, UBE2I, INCA1, ECT2, UBE2B, RBPMS, ARPC5L, ASH1L, KHSRP, SPDEF, PYGO1, TGIF1, DHPS, UBB, CAMTA1, HMGB2, ING2, ARPC4, ARF6…	265	4770	17486	1.18966	0.998148	0.325128	40.4334
GOTERM_BP_2	GO:0051321~meiotic cell cycle	8	2.57235	0.0460149	ADCY3, TUBGCP3, ING2, BAG6, MUS81, AGO4, UBB, UBE2B	265	216	17486	2.44389	0.998868	0.329027	42.797
GOTERM_BP_2	GO:0007623~circadian rhythm	8	2.57235	0.0469632	TNFRSF11A, FBXL21, MAT2A, GFPT1, NR2F6, SRD5A1, SLC4A1, PTEN	265	217	17486	2.43262	0.999019	0.319423	43.4676
GOTERM_BP_2	GO:0022402~cell cycle process	24	7.71704	0.0491068	ADCY3, ILKAP, ING2, MAU2, E2F6, EZH2, PKN2, UBE2I, PTEN, UBE2B, ECT2, SRSF2, ZFP36L2, TUBGCP3, ACVR1B, BAG6, MUS81, CALM3, AGO4, UBB, BRD4, DDIAS, KPNB1, PPP2R2D	265	1053	17486	1.50393	0.99929	0.31725	44.9571
GOTERM_BP_2	GO:0009893~positive regulation of metabolic process	57	18.328	0.0496482	DLC1, VAPB, PRKAG2, EZH2, FOXK2, RHOQ, CTCF, SART3, ITSN1, PTEN, RAB1A, ACVR1B, BAG6, TNFRSF11A, S1PR1, BRD4, MAPKBP1, AGAP2, PHOX2A, RAP2A, FOXJ1, MTA2, ADNP, MINK1, UBE2I, UBE2B, ECT2, RHBDD3, RBPMS, ASH1L, PYGO1, SPDEF, KHSRP, UBB, CAMTA1, HMGB2, ING2, MYBL1, LIN28A, ARNT, OAZ2, ZFP36L2, MAP3K2, TEF, ANKIB1, NEDD4L, PABPC1, PLAGL2, KLF5, ZFP384, EEF1A1, SMARCC1, CALM3, PTCH1, FCGR2A, KCTD13, S…	265	3001	17486	1.2533	0.999346	0.306945	45.3275
GOTERM_BP_2	GO:0098727~maintenance of cell number	6	1.92926	0.072292	EIF4ENIF1, ZFP36L2, EZH2, JMJD1C, LIN28A, HOOK3	265	147	17486	2.69326	0.99998	0.402229	58.9241
GOTERM_BP_2	GO:0051674~localization of cell	28	9.00322	0.0740685	ADCY3, DLC1, HMGB2, ING2, ARHGAP35, ARPC5, PTEN, RAB1A, DRGX, CD47, ACVR1B, NPHP4, S1PR1, PEX2, CERS2, RAP2A, ADAM10, PTPRM, ROCK1, FOXJ1, MTA2, ARHGEF16, PKN2, MINK1, COL5A1, ARPC5L, FCGR2A, KCTD13	265	1336	17486	1.38292	0.999985	0.395713	59.8472
GOTERM_BP_2	GO:0048870~cell motility	28	9.00322	0.0740685	ADCY3, DLC1, HMGB2, ING2, ARHGAP35, ARPC5, PTEN, RAB1A, DRGX, CD47, ACVR1B, NPHP4, S1PR1, PEX2, CERS2, RAP2A, ADAM10, PTPRM, ROCK1, FOXJ1, MTA2, ARHGEF16, PKN2, MINK1, COL5A1, ARPC5L, FCGR2A, KCTD13	265	1336	17486	1.38292	0.999985	0.395713	59.8472
GOTERM_BP_2	GO:0050793~regulation of developmental process	43	13.8264	0.0926562	DLC1, CLDN18, HMGB2, ING2, CLSTN2, FAM20C, EZH2, CNOT3, RHOQ, ARHGAP35, ARF6, LIN28A, PTEN, HOOK3, BAG5, ZFP36L2, ACVR1B, S1PR1, CERS2, CAMSAP1, PALM2, SCARB2, NEDD4L, AGO4, NEGR1, AGAP2, TWIST2, AP3B1, EIF4ENIF1, EEF1A1, RAP2A, PTPRM, ADAM10, ROCK1, FOXJ1, CSNK1G2, UST, ADNP, ECT2, COL5A1, NRAS, TGIF1, PTCH1	265	2268	17486	1.25104	0.999999	0.455979	68.4289
GOTERM_BP_2	GO:0048518~positive regulation of biological process	90	28.9389	0.0976753	DLC1, CLSTN2, VAPB, EZH2, FAM20C, PRKAG2, FOXK2, RHOQ, CTCF, ITSN1, SART3, PTEN, RAB1A, LSM14A, CD47, ACVR1B, BAG6, TNFRSF11A, S1PR1, AAK1, SLC4A1, BRD4, MAPKBP1, AGAP2, NEGR1, TWIST2, AP3B1, SCAMP5, PHOX2A, RAP2A, PTPRM, ADAM10, ROCK1, C2CD5, FOXJ1, MTA2, PKN2, ADNP, ARHGEF16, MINK1, UBE2I, INCA1, ECT2, UBE2B, RHBDD3, RBPMS, ARPC5L, ASH1L, KHSRP, SPDEF, PYGO1, TGIF1, DHPS, UBB, CAMTA1, ORAI1, HM…	265	5226	17486	1.13636	1	0.460269	70.4386
