# Supplementary material for: Genome-wide occupancy reveals the localization of H1T2 (H1fnt) to repeat regions and a subset of transcriptionally active chromatin domains in rat spermatids
Source: Epigenetics Chromatin. 2021 Jan 6;14:3. doi: 10.1186/s13072-020-00376-2 (PMC7788777; doi:10.1186/s13072-020-00376-2)
Supplement: Supplementary file 13 — Additional file 13: Table S11. GO enrichment analysis of the H1T2 IP/MS identified proteins. Excel file related to Fig. 6c: GO analysis_DAVID_ Molecular function. [file 13072_2020_376_MOESM13_ESM.xlsx]

## Sheet: Sheet1
Category	Term	Count	%	PValue	Genes	List Total	Pop Hits	Pop Total	Fold Enrichment	Bonferroni	Benjamini	FDR
GOTERM_MF_DIRECT	GO:0044822~poly(A) RNA binding	133	34.456	3.8023e-62	RALY, MRPL41, RPL13, SNRPD3, SNRPD1, SNRPD2, CCT3, GOT2, SND1, RPLP0, RPN1, PSIP1, PTBP2, H1F0, ALDH6A1, SNRPA1, ACAA2, ACTN4, SUCLG1, PTBP1, DDX39B, HNRNPA2B1, EEF2, MYH9, RPS18, PA2G4, RPS19, RPS16, PTRF, RPS14, ATP5C1, SNRPB, HSPB1, SNRPA, RPS13, MDH2, ALDOA, HSD17B10, FIP1L1, HMGB2, MRPS15, CALR, SERPINH1, HADHB, RPS25, HNRNPA3, HNRNPM, PFN1, HNRNPK, DDX3X, HIST1H4B, RPL6, RPL8, HSPE1, RPL7A,…	365	1134	16650	5.35008	2.26997e-59	2.26997e-59	5.61186e-59
GOTERM_MF_DIRECT	GO:0051082~unfolded protein binding	21	5.44041	1.24759e-16	HSP90AB1, TCP1, GRPEL1, HSP90AA1, CRYAB, HSPA1A, CCT2, CCT3, CALR, SERPINH1, ERLEC1, HSPA1L, CCT7, HSP90B1, CCT4, HSPA2, CCT8, HSPE1, HSPA5, HSPA8, HSPA9	365	76	16650	12.6045	6.62803e-14	3.30846e-14	1.66533e-13
GOTERM_MF_DIRECT	GO:0003735~structural constituent of ribosome	43	11.1399	1.29923e-16	MRPS34, MRPS15, MRPL41, RPL13, RPLP2, RPL36, RPS15A, RPS2, RPS3, RPS25, MRPL11, RPL30, MRPL12, RPL6, RPS3A, RPL31, RPL9, RPLP0, RPL8, MRPL19, MRPL2, RPSA, RPL35A, SLC25A4, MRPS23, RPL26, RPL27, RPS9, RPL23A, RPS4X, RPS8, RPS18, RPS19, SLC25A31, RPL23, RPS16, RPL13A, RPL21, RPS14, RPS13, MRPL46, UBA52	365	421	16650	4.65916	6.62803e-14	2.20934e-14	1.66533e-13
GOTERM_MF_DIRECT	GO:0098641~cadherin binding involved in cell-cell adhesion	31	8.03109	9.673e-16	HSP90AB1, YWHAZ, LDHA, CAPZA1, TAGLN2, IQGAP1, VCL, PKM, PFN1, HNRNPK, EZR, DDX3X, SND1, RAB11B, HSPA5, AHNAK, PLEC, BAIAP2, ANXA1, YWHAB, EEF2, MYH9, YWHAE, FLNA, PARK7, ANXA2, PRDX6, PKP3, CCT8, EEF1G, TMPO	365	220	16650	6.42777	5.96523e-13	1.49103e-13	1.4766e-12
GOTERM_MF_DIRECT	GO:0005515~protein binding	87	22.5389	1.07091e-15	HSP90AB1, LDHA, PDIA3, PDIA6, PDIA4, CLTC, IQGAP1, YBX1, RPS3, CKB, PKM, ACTR2, DYNLL1, DYNLL2, RPS3A, SLC2A3, SND1, SERPINA1, DYNC1H1, TUBA1A, HSP90AA1, SLC25A4, ACO2, ACTN4, CRYAB, BAIAP2, HNRNPA2B1, ERP29, ACTN1, MYH9, FLNA, STOM, RPS18, PA2G4, RPS19, PTRF, PRDX6, CLPP, KHSRP, RAB14, HSPB1, MDH2, ALDOA, RAB7A, YWHAZ, LMNB1, VIM, HSPA1A, CALR, CAPZB, RACK1, PFN1, HNRNPM, TPI1, EZR, HNRNPK, HSPA…	365	1589	16650	2.49756	6.62803e-13	1.32561e-13	1.64313e-12
GOTERM_MF_DIRECT	GO:0003729~mRNA binding	23	5.95855	1.41885e-12	EEF1A1, HSP90AA1, PTBP1, ELAVL1, CALR, RPS2, HNRNPA1, PARK7, YBX1, YBX2, RPS3, HNRNPA3, EIF4A3, RPL13A, RPS3A, RPL6, FYTTD1, NUDT21, KHSRP, RPS13, PTBP2, PABPC1, HNRNPC	365	149	16650	7.04146	8.47062e-10	1.41177e-10	2.09411e-09
GOTERM_MF_DIRECT	GO:0003723~RNA binding	39	10.1036	2.59087e-12	RALY, FIP1L1, RPL13, PABPC6, SNRPD3, SNRPD1, RPS2, YBX1, RPS3, HNRNPM, HNRNPK, DDX3X, RPL9, PCBP2, NUDT21, RPL7A, PABPC1, RGD1304704, HSPA8, ENO1, PTBP1, HNRNPA2B1, ELAVL1, EEF2, HNRNPA1, FBL, HSP90B1, RPS18, PA2G4, PSMA6, ILF2, RPS16, RPS14, PSPC1, KHSRP, SNRPB, SNRPA, HNRNPH1, MATR3	365	465	16650	3.82589	1.54672e-09	2.2096e-10	3.82382e-09
GOTERM_MF_DIRECT	GO:0019899~enzyme binding	31	8.03109	2.31272e-09	GLUD1, SNRPD3, HSPA1A, RPS2, GSTM5, ACAT1, RPS3, GOT2, RACK1, HSPA2, DYNLL1, ALB, PCBP2, TGM2, H2AFY, CAT, HSPA5, GAPDH, HSPA8, HSPA9, P4HB, SLC25A4, PHB, YWHAB, ILF3, DDX5, YWHAE, PARK7, SOD2, TUBA4A, HNRNPH1	365	389	16650	3.63524	1.38069e-06	1.72587e-07	3.41337e-06
GOTERM_MF_DIRECT	GO:0051287~NAD binding	12	3.10881	2.89458e-08	GAPDHS, HSD17B10, LDHA, AHCY, NDUFV1, DLD, IDH3B, GAPDH, IDH3A, HADHA, HIBADH, HADHB	365	56	16650	9.77495	1.72805e-05	1.72806e-06	4.27215e-05
GOTERM_MF_DIRECT	GO:0051015~actin filament binding	17	4.40415	6.4532e-08	ACTN4, CAPZA1, ACTN1, EEF2, MYH9, TPM2, CAPZB, FLNA, VCL, ESPN, ANXA2, TPM3, ACTR2, ANXA8, EZR, ARPC2, PLS3	365	139	16650	5.57899	3.85248e-05	3.50232e-06	9.52434e-05
GOTERM_MF_DIRECT	GO:0016887~ATPase activity	19	4.92228	7.33359e-08	ACTC1, HSP90AA1, ATP5B, DDX39B, ATP5F1, HSPA1A, MYH9, DDX3X, VCP, EIF4A2, ATP5C1, RUVBL2, ATP5O, HSPA5, RUVBL1, ATP5A1, DYNC1H1, ATP5H, HSPA8	365	178	16650	4.86917	4.37806e-05	3.64845e-06	0.000108237
GOTERM_MF_DIRECT	GO:0031625~ubiquitin protein ligase binding	22	5.69948	2.03837e-06	TCP1, YWHAZ, UQCRC1, HSPA1A, CCT2, CALR, YWHAE, CKB, VCL, HSPA1L, ACTG1, PA2G4, TPI1, VCP, PRDX6, OTUB1, PCBP2, HSPA5, HSPD1, YOD1, HSPA8, HSPA9	365	293	16650	3.42513	0.00121617	8.69182e-05	0.00300841
GOTERM_MF_DIRECT	GO:0003725~double-stranded RNA binding	11	2.84974	2.38088e-06	HSP90AB1, ILF2, VIM, EIF4A1, ELAVL1, ACTN1, ILF3, MSN, HSPD1, CLTC, TUBB4B	365	69	16650	7.27219	0.00142038	9.47546e-05	0.00351391
GOTERM_MF_DIRECT	GO:0000166~nucleotide binding	23	5.95855	2.55624e-06	RALY, EEF1A1, PABPC6, HNRNPA2B1, PTBP1, ELAVL1, RPL23A, DLAT, VDAC2, HNRNPA1, VDAC3, HNRNPA3, HNRNPM, SFPQ, PSPC1, CPSF7, SNRPA, PTBP2, PABPC1, HNRNPC, HNRNPH1, RBM14, MATR3	365	322	16650	3.25832	0.00152491	9.53751e-05	0.00377271
GOTERM_MF_DIRECT	GO:0032403~protein complex binding	24	6.21762	7.00198e-06	UQCRC2, YWHAZ, UQCRC1, ACTN4, DDX39B, YWHAB, UQCRFS1, RPS2, YWHAE, HADHA, FLNA, IQGAP1, HADHB, RPS19, EZR, PPIB, VCP, RPS3A, ARPC2, PGAM5, ATP5O, HSPD1, UQCRB	365	369	16650	2.96692	0.00417147	0.000232206	0.0103338
GOTERM_MF_DIRECT	GO:0005200~structural constituent of cytoskeleton	10	2.59067	2.61223e-05	ACTG1, ACTR2, ARPC2, TUBB2A, VIM, TUBA4A, TUBA1A, TUBB3, TUBB4B, PLEC	365	72	16650	6.33562	0.0154742	0.000708621	0.0385472
GOTERM_MF_DIRECT	GO:0005525~GTP binding	23	5.95855	3.46695e-05	RAB2A, TUFM, HSP90AB1, RAB7A, EEF1A1, TF, HSP90AA1, TUBB2A, SUCLG1, GLUD1, AK3, EEF2, IRGC, ARF1, RAB18, TGM2, RAB14, RAB11B, TUBA4A, RAB6A, TUBA1A, TUBB3, TUBB4B	365	380	16650	2.76099	0.0204853	0.000862047	0.0511569
GOTERM_MF_DIRECT	GO:0042802~identical protein binding	32	8.29016	3.81867e-05	HSD17B10, LDHA, YWHAZ, IMPA1, AHCY, VIM, CCDC91, PRDX3, GSTM5, ACTG1, DES, ALB, BAG2, SERPINA1, RGD1304704, HNRNPC, GAPDH, ECI1, HSP90AA1, CRYAB, BAIAP2, AK3, NECTIN2, PARK7, SOD2, CCT7, STOM, VCP, CLPP, ALDH2, HSPB1, RUVBL2	365	647	16650	2.25615	0.02254	0.000911499	0.0563453
GOTERM_MF_DIRECT	GO:0019904~protein domain specific binding	20	5.18135	5.30059e-05	HMGB2, YWHAZ, YWHAB, ACTN1, SFN, MYH9, YWHAE, IQGAP1, HNRNPM, EZR, HNRNPK, DYNLL1, VCP, HIST1H4B, TGM2, HSPA5, RAB6A, HNRNPC, TUBA1A, CALM1	365	309	16650	2.95252	0.0311499	0.00121639	0.0782035
GOTERM_MF_DIRECT	GO:0003924~GTPase activity	15	3.88601	0.000119817	RAB2A, TUFM, EEF1A1, RAB7A, TUBB2A, EEF2, IRGC, DDX3X, RAB11B, RAB14, TUBA4A, RAB6A, TUBA1A, TUBB3, TUBB4B	365	198	16650	3.45579	0.0690363	0.00246369	0.176694
GOTERM_MF_DIRECT	GO:0042803~protein homodimerization activity	32	8.29016	0.00166997	GRPEL1, IMPA1, CPQ, PRDX4, ACAT1, GSTM5, PRDX1, RACK1, GOT2, DYNLL1, NUDT21, CAT, HSD17B4, ENO1, HSP90AA1, ACTN4, CRYAB, ERP29, ANXA1, ACTN1, ELAVL1, NECTIN2, TPD52L2, MYH9, PARK7, FLNA, STOM, RPS19, ARF1, RUVBL2, PDCD6IP, SCP2	365	805	16650	1.81332	0.631313	0.024043	2.43662
GOTERM_MF_DIRECT	GO:0005524~ATP binding	48	12.4352	0.00216189	HSP90AB1, ATP5B, GLUD1, CCT2, HSPA1A, CCT3, ATP6V1B2, CKB, ACTG1, PKM, HSPA1L, ACTR2, HSPA2, DDX3X, DDX3Y, HSPE1, HSPA5, DYNC1H1, SUCLA2, HSPA8, HSPA9, TCP1, ACTC1, HSP90AA1, DDX39B, AK3, AK2, MYH9, DDX5, CCT7, ATP6V1A, HYOU1, EIF4A3, HSP90B1, CCT4, ILF2, VCP, UBA1, EIF4A2, EIF4A1, CCT8, HARS, RUVBL2, ATP5A1, RUVBL1, HSPD1, PGK1, PGK2	365	1403	16650	1.56065	0.725292	0.0283039	3.14374
GOTERM_MF_DIRECT	GO:0019901~protein kinase binding	20	5.18135	0.00371066	HSP90AB1, EEF1A1, YWHAZ, HSP90AA1, VIM, PGAM1, ELAVL1, EEF2, PRDX3, SFN, MYH9, CLTC, IQGAP1, RPS3, RPS18, RPS19, H2AFY, HSPB1, MSN, CALM1	365	438	16650	2.08294	0.891324	0.042584	5.33898
